# Supplementary material for: Mechanosynthesis of sulfonamides via a telescopic, environmentally friendly, and cost-effective process
Source: Royal Society of Chemistry journal article supplement (doi:10.1039/d3gc01894f), 2024-01-01
Supplement: d3gc01894f1.pdf [file d3gc01894f1.pdf]

# **Mechanosynthesis of sulfonamides via a telescopic, environmentally friendly, and cost-effective process**

Federico Cuccu,<sup>a</sup> Andrea Porcheddu <sup>\*a</sup>

<sup>a</sup>Dipartimento di Scienze Chimiche e Geologiche, Università degli Studi di Cagliari, Cittadella Universitaria, Monserrato, 09042 Cagliari, Italy

Number of pages: 113

Number of figures: 2

Number of schemes: 1

Number of tables: 2

## Table of Content

|                                                               |     |
|---------------------------------------------------------------|-----|
| <b>1. General information</b> .....                           | 3   |
| <b>2. List of Compounds</b> .....                             | 4   |
| <b>3. Mechanochemical synthesis of 2a-n and 3-15a-n</b> ..... | 5   |
| <b>4. Screening</b> .....                                     | 6   |
| <b>5. Compounds</b> .....                                     | 8   |
| <b>6. Green Metrics Calculations</b> .....                    | 35  |
| <b>7. Spectra</b> .....                                       | 39  |
| <b>8. References</b> .....                                    | 113 |

## 1. General information

Commercially available reagents were purchased from Acros, Aldrich, Strem Chemicals, Alfa-Aesar, TCI Europe and used as received. All reactions were monitored by thin-layer chromatography (TLC) performed on glass-backed silica gel 60 F254, 0.2 mm plates (Merck), and compounds were visualized under UV light (254 nm) or using cerium ammonium molybdate solution with subsequent heating. The eluents were technical grade. Mechanochemical reactions were carried out using a FormTech FTS-1000 Shaker Mill® apparatus. The reagents were milled using a zirconia SmartSnap™ grinding jar (15 mL) equipped with balls ( $\phi = 8$  mm) of the same material. Precisely, the zirconium oxide of the vessels and balls used for all reactions accomplished in the mixer mill is yttrium oxide stabilized ( $\text{ZrO}_2\text{-Y}$ ). These parameters were applied if not stated otherwise.  $^1\text{H}$  and  $^{13}\text{C}$  liquid NMR spectra were recorded on a Varian 500 MHz and Bruker Avance III HD 600 MHz NMR spectrometer at 298 K and were calibrated using trimethylsilyl silane (TMS). Proton chemical shifts are expressed in parts per million (ppm,  $\delta$  scale) and are referred to the residual hydrogen in the solvent ( $\text{CHCl}_3$ , 7.27 ppm or DMSO 2.54 ppm). Data are represented as follows: chemical shift, multiplicity (s = singlet, d = doublet, t = triplet, q = quartet, m = multiplet and/or multiple resonances, bs = broad singlet, and combination of thereof), coupling constant (J) in Hertz (Hz) and integration. Carbon chemical shifts are expressed in parts per million (ppm,  $\delta$  scale) and are referenced to the carbon resonances of the NMR solvent ( $\text{CDCl}_3$ ,  $\delta$  77.0 ppm or  $\delta$  DMSO- $d_6$   $\delta$  39.5 ppm). Deuterated NMR solvents were obtained from Aldrich. Samples were analyzed using an Agilent 5977B MS interfaced to the GC 7890B equipped with a DB-5ms column (J & W), injector temperature at 230 °C, detector temperature at 280 °C, helium carrier gas flow rate of 1 ml/min. The GC oven temperature program was 60°C initial temperature with 4 min hold time and ramping at 15°C/min to a final temperature of 270°C with 7 min hold time. 1  $\mu\text{L}$  of each sample was injected in split (1:20) mode. After a solvent delay of 3 minutes mass spectra were acquired in full scan mode using 2.28 scans/s with a mass range of 50–500 Amu. Retention times of different compounds were determined by injecting pure compound under identical conditions. All the experiments were carried out in duplicate to ensure reproducibility of the experimental data. Yields refer to pure isolated materials.

## 2. List of Compounds

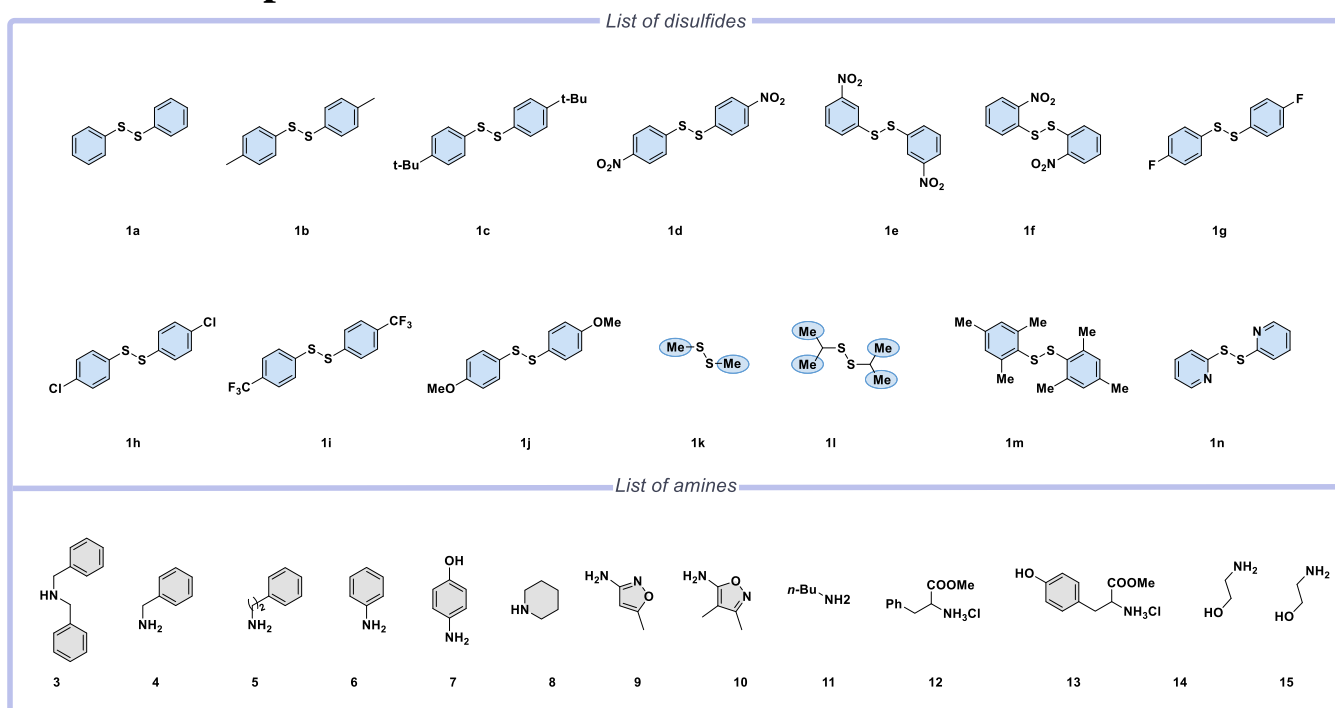

**Figure F1.** List of the used organic reagents.

### 3. Mechanochemical synthesis of 2a-n and 3-15a-n

**General Procedure A for the preparation of sulfonyl chloride (2a-n):** a 15 mL ZrO<sub>2</sub> jar equipped with two ZrO<sub>2</sub> balls ( $\Phi = 8$  mm,  $mass_{tot} = 3.22$  g) was charged with NaHSO<sub>4</sub> (10 mol%, 0.1 mmol), followed by disulfide (**1a-n**) (1.0 mmol) and NaOCl\*5 H<sub>2</sub>O (6 mmol). (*Attention!* It is crucial to add the reagents in the written order for the success of the reaction since a variable loss of gas could affect the yields). The jar was then closed and the mechanochemical reaction was conducted for 40 min at a frequency of 30 Hz. At the end of the reaction, the crude was recovered with 5 mL of AcOEt, filtered and concentrated under reduced pressure to afford the desired product **2a-n**. For the synthesis of **2h**, the amount of NaOCl\*5H<sub>2</sub>O had to be raised up to 7 mmol. For the synthesis of **2d-f** and **2i** the reaction time raised up to 180 min, and a short silica pad (Hexane/AcOEt: 3/7) was required for further purification.

**General Procedure B for the preparation of sulfonamides (3-15 a-n):** a 15 mL ZrO<sub>2</sub> jar equipped with two ZrO<sub>2</sub> balls ( $\Phi = 8$  mm,  $mass_{tot} = 3.22$  g) was charged with sulphonyl chloride **2a-n** (1 mmol), amine **3-15** (1.1 mmol) and MgO (4 mmol) The jar was then closed, and the reaction was conducted for 120 min at a frequency of 30 Hz. At the end of the reaction, the crude was recovered with AcOEt (5 ml) from the jar and filtered. The filtrate was washed with an aqueous solution of citric acid 3x5 mL (10% w/w), to obtain the desired sulphonamide product **3-15a-n**. In some cases, a further extraction with AcOEt of the aqueous phase was required to improve the yields. A short silica pad (Hexane/AcOEt: 3/7) was required for compound **6k**. For the synthesis of sulfonamides **9d** and **10d**, *N*-methyl imidazole was added as LAG ( $\eta = 0.6$   $\mu$ L/mg) and the reaction was conducted for 180 min.

**General One Pot Procedure C for the preparation of sulfonamides (3-15a-n):** a 15 mL ZrO<sub>2</sub> jar equipped with two ZrO<sub>2</sub> balls ( $\Phi = 8$  mm,  $mass_{tot} = 3.22$  g) was charged with NaHSO<sub>4</sub> (10 mol%, 0.1 mmol), followed by disulfide (**1a-n**) (1.0 mmol) and NaOCl\*5H<sub>2</sub>O (6 mmol). (*Attention!* It is crucial to add the reagents in the written order for the success of the reaction since a variable loss of gas could affect the yields). The jar was then closed and the mechanochemical reaction was conducted for 40 min at a frequency of 30 Hz (for the synthesis of **2h**, the amount of NaOCl\*5 H<sub>2</sub>O had to be raised up to 7 mmol. For the synthesis of **2d-f** and **2i** the reaction time raised up to 180 min). At the end of the first step, the jar was opened and the amine **3-15** (2.2 mmol) and MgO (4 mmol) were added to the mixture. The jar was then closed, and the reaction was conducted for 90-120 min at a milling frequency of 30 Hz. Once the second step was ended, the crude was recovered from the jar with 10 mL of AcOEt and filtered. The filtrate was washed with an aqueous solution of citric acid 3x5 mL (10% w/w), to obtain the desired sulphonamide product **3-15a-n**. In some cases, a further extraction with AcOEt of the aqueous phase was required to improve the yields. A short silica pad (Hexane/AcOEt: 3/7) was required for compound **6k**. For the synthesis of sulfonamides **9d** and **10d**, *N*-methyl imidazole was added as LAG ( $\eta = 0.6$   $\mu$ L/mg) and the reaction was conducted for 3h.

*Please note:* for the preparation of the non-commercially available compounds **1c**, **1g**, **1i** and **1m** a solution-based methodology has been used. Please see this link to the following paper to know more about it: <https://pubs.rsc.org/en/content/articlelanding/2017/CC/C7CC02652H>.

## 4. Screening

**Table T1.** Reaction optimization for base.

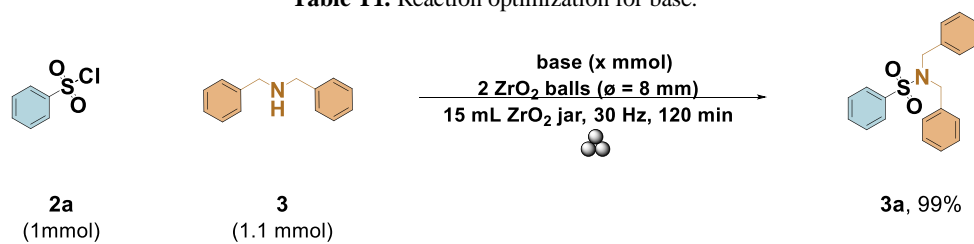

| Entry | Base                            | Amount        | Conversion (%) <sup>a</sup> |
|-------|---------------------------------|---------------|-----------------------------|
| 1     | Na <sub>2</sub> CO <sub>3</sub> | 1 mmol        | 9                           |
| 2     | Na <sub>2</sub> CO <sub>3</sub> | 2 mmol        | 19                          |
| 3     | Na <sub>2</sub> CO <sub>3</sub> | 4 mmol        | 65                          |
| 5     | K <sub>2</sub> CO <sub>3</sub>  | 1 mmol        | 7                           |
| 6     | K <sub>2</sub> CO <sub>3</sub>  | 2 mmol        | 20                          |
| 7     | K <sub>2</sub> CO <sub>3</sub>  | 4 mmol        | 62                          |
| 9     | Cs <sub>2</sub> CO <sub>3</sub> | 1 mmol        | 14                          |
| 10    | Cs <sub>2</sub> CO <sub>3</sub> | 2 mmol        | 30                          |
| 11    | Cs <sub>2</sub> CO <sub>3</sub> | 4 mmol        | 66                          |
| 12    | MgO                             | 1 mmol        | 5                           |
| 13    | MgO                             | 2 mmol        | 32                          |
| 14    | <b>MgO</b>                      | <b>4 mmol</b> | <b>99</b>                   |
| 15    | none                            | -             | < 1                         |

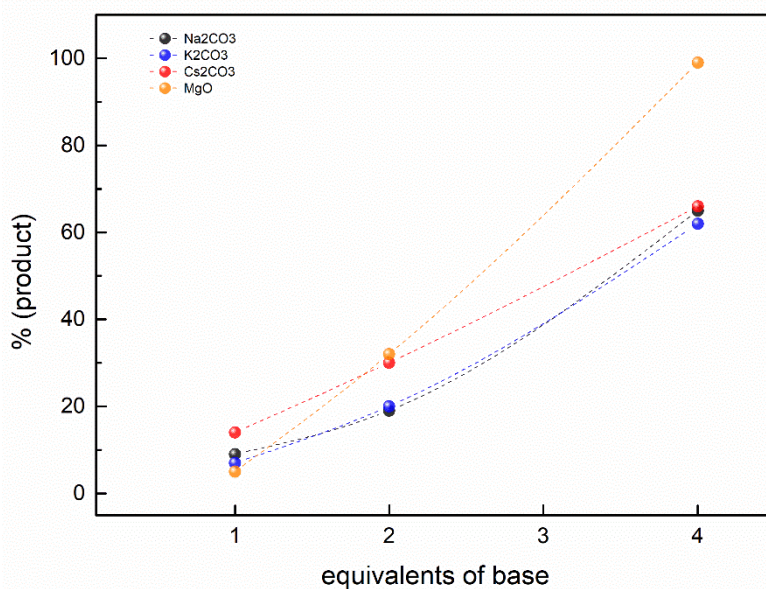

**Figure F2.** Plotted screening of bases used in relation to their equivalents.

**Table T2.** Reaction optimization for the pharmaceutical scope.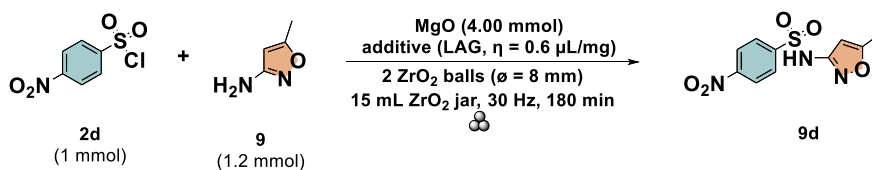

| Entry | Additive (LAG)             | Amount ( $\mu\text{L}/\text{mg}$ ) | Conversion (%) <sup>a</sup> |
|-------|----------------------------|------------------------------------|-----------------------------|
| 1     | <i>N</i> -methyl imidazole | 0.6 $\mu\text{L}/\text{mg}$        | 75                          |
| 2     | Acetone                    | 0.6 $\mu\text{L}/\text{mg}$        | n.d.                        |
| 3     | Acetonitrile               | 0.6 $\mu\text{L}/\text{mg}$        | traces                      |
| 5     | Methanol                   | 0.6 $\mu\text{L}/\text{mg}$        | 4                           |
| 6     | <i>tert</i> -Butanol       | 0.6 $\mu\text{L}/\text{mg}$        | < 1                         |
| 7     | Ethyl Acetate              | 0.6 $\mu\text{L}/\text{mg}$        | n.d.                        |
| 9     | Dioxane                    | 0.6 $\mu\text{L}/\text{mg}$        | n.d.                        |
| 10    | Toluene                    | 0.6 $\mu\text{L}/\text{mg}$        | n.d.                        |
| 11    | Hexane                     | 0.6 $\mu\text{L}/\text{mg}$        | n.d.                        |

Mechanochemical conditions for this screening: Reaction conditions: sulfonyl chloride **2d** (1 mmol), amine **9** (1.1 equiv.), MgO (4.00 mmol) and a solvent (LAG,  $\eta = 0.6 \mu\text{L}/\text{mg}$ ) were placed in a 15 mL zirconia jar equipped with two zirconia balls ( $\Phi = 8 \text{ mm}$ , 3.22 g) at a frequency of 30 Hz for 180 min.

## CONSISTENCY WITH LITERATURE

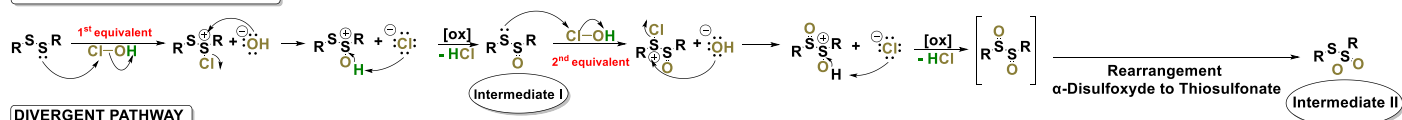

## DIVERGENT PATHWAY

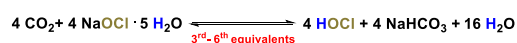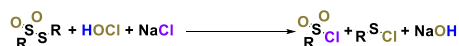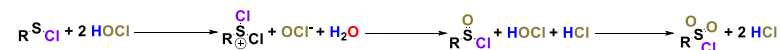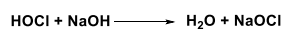

**Scheme S1.** Mechanochemical oxidation reaction of disulfides mediated by  $\text{NaOCl} \cdot 5\text{H}_2\text{O}$  and divergent chlorination pathway promoted by atmospheric  $\text{CO}_2$ .

## 5. Compounds

### Benzenesulphonyl chloride (**2a**)

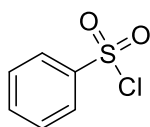

The title compound was synthesized according to the general procedure A stated above. **1a** (218.33 mg, 1.00 mmol), NaOCl\*5H<sub>2</sub>O (987.12 mg, 6.00 mmol), NaHSO<sub>4</sub> (12.01 mg, 0.10 mmol) were used, to afford **2a** as a yellowish oil (349.69 mg, 0.99 mmol, 99%).

<sup>1</sup>H NMR (600 MHz, CDCl<sub>3</sub>): δ 8.06 – 8.04 (m, 2H), 7.77 – 7.74 (m, 1H), 7.65 – 7.62 (m, 2H).

<sup>13</sup>C NMR (151 MHz, CDCl<sub>3</sub>): δ 144.6, 135.4, 129.8, 127.1.

The spectroscopic data closely match the ones previously reported in the literature.<sup>1</sup>

### 4-(Methyl)benzenesulphonyl chloride (**2b**)

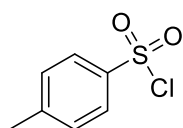

The title compound was synthesized according to the general procedure A stated above. **1b** (246.39 mg, 1.00 mmol), NaOCl\*5H<sub>2</sub>O (987.12 mg, 6.00 mmol), NaHSO<sub>4</sub> (12.01 mg, 0.10 mmol) were used, to afford **2b** as a white solid. (369.84 mg, 0.97 mmol, 97%).

<sup>1</sup>H NMR (600 MHz, CDCl<sub>3</sub>) δ 7.92-7.90 (d, *J* = 8.3 Hz, 2H), 7.41-7.40 (d, *J* = 8.3 Hz, 2H), 2.49 (s, 3H).

<sup>13</sup>C NMR (151 MHz, CDCl<sub>3</sub>) δ 147.0, 141.8, 130.4, 127.1, 21.9.

**M.P.:** 69-71 °C.

The spectroscopic data closely match the ones previously reported in the literature.<sup>1</sup>

### 4-(*tert*-Butyl)benzenesulphonyl chloride (**2c**)

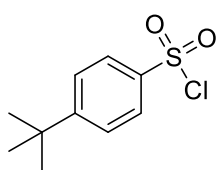

The title compound was synthesized according to the general procedure A stated above. **1c** (330.55 mg, 1.00 mmol), NaOCl\*5H<sub>2</sub>O (987.12 mg, 6.00 mmol), NaHSO<sub>4</sub> (12.01 mg, 0.10 mmol) were used, to afford **2c** as a white solid. (442.17 mg, 0.95 mmol, 95%).

<sup>1</sup>H NMR (600 MHz, CDCl<sub>3</sub>): δ 7.97 – 7.95 (m, 2H), 7.63 – 7.61 (m, 2H), 1.37 (s, 9H).

<sup>13</sup>C NMR (151 MHz, CDCl<sub>3</sub>): δ 159.8, 141.7, 127.1, 126.8, 35.7, 31.1.

**M.P.:** 80-82 °C.

The spectroscopic data closely match the ones previously reported in the literature.<sup>2</sup>

### 4-(Nitro)benzenesulphonyl chloride (**2d**)

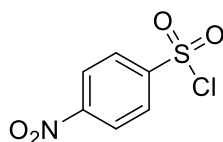

The title compound was synthesized according to the general procedure A stated above. **1d** (308.33 mg, 1.00 mmol), NaOCl\*5H<sub>2</sub>O (987.12 mg, 6.00 mmol), NaHSO<sub>4</sub> (12.01 mg, 0.10 mmol) were used, to afford **2d** as a yellow solid. (345.71 mg, 0.78 mmol, 78%).

<sup>1</sup>H NMR (600 MHz, CDCl<sub>3</sub>) δ 8.49 – 8.47 (m, 2H), 8.27 – 8.26 (m, 2H).



$^{13}\text{C}$  NMR (151 MHz,  $\text{CDCl}_3$ )  $\delta$  151.5, 148.8, 128.7, 125.2.

**M.P.:** 78 °C.

The spectroscopic data closely match the ones previously reported in the literature.<sup>2</sup>

### 3-(Nitro)benzenesulphonyl chloride (**2e**)

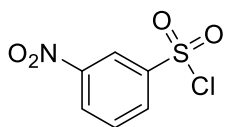

The title compound was synthesized according to the general procedure A stated above. **1e** (308.33 mg, 1.00 mmol),  $\text{NaOCl}\cdot 5\text{H}_2\text{O}$  (987.12 mg, 6.00 mmol),  $\text{NaHSO}_4$  (12.01 mg, 0.10 mmol) were used, to afford **2e** as a yellow solid. (354.58 mg, 0.80 mmol, 80%).

$^1\text{H}$  NMR (600 MHz,  $\text{CDCl}_3$ )  $\delta$  8.88-8.86 (t,  $J = 2.0$  Hz, 1H), 8.62-8.60 (ddd,  $J = 8.3, 2.2, 1.0$  Hz, 1H), 8.39-8.37 (ddd,  $J = 7.9, 1.9, 1.0$  Hz, 1H), 7.93-7.90 (t,  $J = 8.1$  Hz, 1H).

$^{13}\text{C}$  NMR (151 MHz,  $\text{CDCl}_3$ )  $\delta$  148.5, 145.6, 132.4, 131.5, 129.7, 122.5.

**M.P.:** 60-62 °C.

The spectroscopic data closely match the ones previously reported in the literature.<sup>2</sup>

### 2-(Nitro)benzenesulphonyl chloride (**2f**)

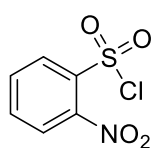

The title compound was synthesized according to the general procedure A stated above. **1f** (308.33 mg, 1.00 mmol),  $\text{NaOCl}\cdot 5\text{H}_2\text{O}$  (987.12 mg, 6.00 mmol), and  $\text{NaHSO}_4$  (12.01 mg, 0.10 mmol) were used to afford **2f** as a yellow solid. (332.42 mg, 0.75 mmol, 75%).

$^1\text{H}$  NMR (600 MHz,  $\text{CDCl}_3$ )  $\delta$  8.27 (dd,  $J = 8.0, 1.4$  Hz, 1H), 7.93 (ddd,  $J = 8.6, 7.3, 1.4$  Hz, 1H), 7.90 – 7.87 (m, 1H), 7.86 – 7.84 (m, 1H).

$^{13}\text{C}$  NMR (151 MHz,  $\text{CDCl}_3$ )  $\delta$  146.2, 136.6, 136.2, 133.0, 130.6, 125.4.

**M.P.:** 65-67 °C.

The spectroscopic data closely match the ones previously reported in the literature.<sup>3</sup>

### 4-(Fluoro)benzenesulphonyl chloride (**2g**)

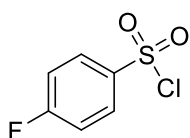

The title compound was synthesized according to the general procedure A stated above. **1g** (254.31 mg, 1.00 mmol),  $\text{NaOCl}\cdot 5\text{H}_2\text{O}$  (987.12 mg, 6.00 mmol),  $\text{NaHSO}_4$  (12.01 mg, 0.10 mmol) were used to afford **2g** as a white solid. (350.28 mg, 0.90 mmol, 90%).

$^1\text{H}$  NMR (600 MHz,  $\text{CDCl}_3$ )  $\delta$  8.10 – 8.07 (m, 2H), 7.32 – 7.29 (m, 2H).

$^{13}\text{C}$  NMR (151 MHz,  $\text{CDCl}_3$ )  $\delta$  166.4 (d,  $J_{\text{C-F}} = 260.6$  Hz), 140.3 (d,  $J_{\text{C-F}} = 3.0$  Hz), 130.1 (d,  $J_{\text{C-F}} = 10.1$  Hz), 117.1 (d,  $J_{\text{C-F}} = 23.2$  Hz).

**M.P.:** 30-31 °C.

The spectroscopic data closely match the ones previously reported in the literature.<sup>2</sup>

4-(Chloro)benzenesulphonyl chloride (**2h**)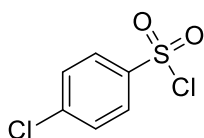

The title compound was synthesized according to the general procedure A stated above. **1h** (287.22 mg, 1.00 mmol), NaOCl\*5H<sub>2</sub>O (1151.64 mg, 7.00 mmol), NaHSO<sub>4</sub> (12.01 mg, 0.10 mmol) were used, to afford **2h** as a white solid. (405.24 mg, 0.98 mmol, 98%).

<sup>1</sup>H NMR (600 MHz, CDCl<sub>3</sub>) δ 8.00 – 7.98 (m, 2H), 7.62 – 7.59 (m, 2H).

<sup>13</sup>C NMR (151 MHz, CDCl<sub>3</sub>) δ 142.8, 142.4, 130.2, 128.6.

M.P.: 54-56 °C.

The spectroscopic data closely match the ones previously reported in the literature.<sup>2</sup>

4-(Trifluoromethyl)benzenesulphonyl chloride (**2i**)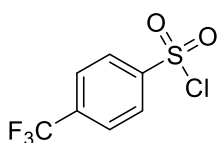

The title compound was synthesized according to the general procedure A stated above. **1i** (354.33 mg, 1.00 mmol), NaOCl 5H<sub>2</sub>O (987.12 mg, 6.00 mmol), NaHSO<sub>4</sub> (12.01 mg, 0.10 mmol) were used, to afford **2i** as a white solid. (484.33 mg, 0.99 mmol, 99%).

<sup>1</sup>H NMR (600 MHz, CDCl<sub>3</sub>) δ 8.20 – 8.19 (m, 2H), 7.92 – 7.91 (m, 2H).

<sup>13</sup>C NMR (151 MHz, CDCl<sub>3</sub>) δ 147.3, 137.0 (q, *J*<sub>C-F</sub> = 33.3 Hz), 136.7, 127.0 (q, *J*<sub>C-F</sub> = 3.7 Hz), 121.9 (q, *J*<sub>C-F</sub> = 273.7 Hz).

M.P.: 31-33 °C.

The spectroscopic data closely match the ones previously reported in the literature.<sup>2</sup>

4-(Methoxy)benzenesulphonyl chloride (**2j**)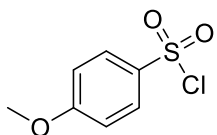

The title compound was synthesized according to the general procedure A stated above. **1j** (354.33 mg, 1.00 mmol), NaOCl\*5H<sub>2</sub>O (987.12 mg, 6.00 mmol), NaHSO<sub>4</sub> (12.01 mg, 0.10 mmol) were used, to afford **2j** as a white solid. (409.15 mg, 0.99 mmol, 99%).

<sup>1</sup>H NMR (600 MHz, CDCl<sub>3</sub>) δ 7.99 – 7.97 (m, 2H), 7.06 – 7.04 (m, 2H), 3.92 (s, 3H).

<sup>13</sup>C NMR (151 MHz, CDCl<sub>3</sub>) δ 165.0, 136.3, 129.7, 114.9, 56.1.

M.P.: 40-41 °C

The spectroscopic data closely match the ones previously reported in the literature.<sup>1,2</sup>

Dimethylsulfonyl chloride (**2k**)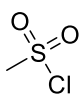

The title compound was synthesized according to the general procedure A stated above. **1k** (94.19 mg, 1.00 mmol), NaOCl\*5H<sub>2</sub>O (987.12 mg, 6.00 mmol), NaHSO<sub>4</sub> (12.01 mg, 0.10 mmol) were used, to afford **2k** as a colourless oil. (GC-MS conversion: 99%).

2-Isopropylsulfonyl chloride (**2l**)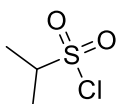

The title compound was synthesized according to the general procedure A stated above. **1l** (150.30 mg, 1.00 mmol), NaOCl\*5H<sub>2</sub>O (987.12 mg, 6.00 mmol), NaHSO<sub>4</sub> (12.01 mg, 0.10 mmol) were used, to afford **2l** as a white solid. (282.35 mg, 0.99 mmol, 99%).

$^1\text{H NMR}$  (600 MHz,  $\text{CDCl}_3$ )  $\delta$  3.80 – 3.70 (hept,  $J = 6.7$  Hz, 1H), 1.61 – 1.58 (dd,  $J = 6.7, 1.1$  Hz, 6H).

$^{13}\text{C NMR}$  (151 MHz,  $\text{CDCl}_3$ )  $\delta$  67.5, 17.4.

The spectroscopic data closely match the ones previously reported in the literature.<sup>4</sup>

#### 2,4,6-Trimethylbenzenesulfonyl chloride (**2m**)

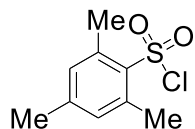

The title compound was synthesized according to the general procedure A stated above. **1m** (302,49 mg, 1.00 mmol),  $\text{NaOCl}\cdot 5\text{H}_2\text{O}$  (987.12 mg, 6.00 mmol),  $\text{NaHSO}_4$  (12.01 mg, 0.10 mmol) were used, to afford **2n** as a pale yellow solid. (411,12 mg, 0.94 mmol, 94%).

$^1\text{H NMR}$  (600 MHz,  $\text{CDCl}_3$ )  $\delta$  7.03 (s, 2H), 2.73 (s, 6H), 2.35 (s, 3H).

$^{13}\text{C NMR}$  (151 MHz,  $\text{CDCl}_3$ )  $\delta$  145.6, 140.1, 139.6, 132.4, 23.0, 21.3.

**M.P.:** 58 °C

#### Pyridine-2-sulfonyl chloride (**2n**)

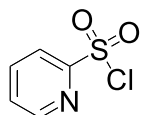

The title compound was synthesized according to the general procedure A stated above. **1n** (220,31 mg, 1.00 mmol),  $\text{NaOCl}\cdot 5\text{H}_2\text{O}$  (987.12 mg, 6.00 mmol),  $\text{NaHSO}_4$  (12.01 mg, 0.10 mmol) were used, to afford **2n** as a viscous yellow oil. (310,13 mg, 0.87 mmol, 87%).

$^1\text{H NMR}$  (600 MHz,  $\text{CDCl}_3$ )  $\delta$  8.81 (d,  $J = 4.7$  Hz, 1H), 8.12 – 8.03 (m, 2H), 7.72 – 7.66 (m, 1H).

$^{13}\text{C NMR}$  (151 MHz,  $\text{CDCl}_3$ )  $\delta$  159.2, 150.8, 139.2, 129.3, 122.0.

*N,N*-dibenzyl-benzenesulphonamide (**3a**)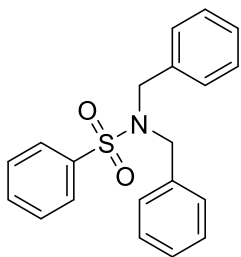

The title compound was synthesized according to the general procedure B stated above. **2a** (176.61 mg, 1.00 mmol), **3** (217.01 mg, 1.1 mmol) and MgO (161.20 mg, 4.00 mmol) were used, to afford **3a** as a white solid (303.70 mg, 0.90 mmol, 90%).

The title compound was synthesized according to the general procedure C stated above. **1a** (218.33 mg, 1.00 mmol), NaOCl\*5H<sub>2</sub>O (987.12 mg, 6.00 mmol), NaHSO<sub>4</sub> (12.01 mg, 0.10 mmol), **3** (434.02 mg, 2.2 mmol), MgO (161.20 mg, 4.00 mmol) were used, to afford **3a** as a white solid (607.40 mg, 1.8 mmol, 90%).

<sup>1</sup>H NMR (600 MHz, CDCl<sub>3</sub>): δ 7.87 – 7.85 (m, 2H), 7.59 – 7.58 (m, 1H), 7.53 – 7.50 (m, 2H), 7.22 – 7.21 (m, 6H), 7.05 – 7.04 (m, 4H), 4.34 (s, 4H).

<sup>13</sup>C NMR (151 MHz, CDCl<sub>3</sub>): δ 141.0, 135.7, 132.6, 129.3, 129.2, 128.7, 128.6, 127.8, 50.6.

M.P.: 74-76 °C

The spectroscopic data closely match the ones previously reported in the literature.<sup>5</sup>

*N,N*-Dibenzyl-4-(methyl)benzenesulphonamide (**3b**)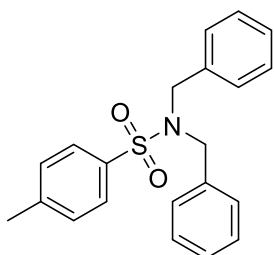

The title compound was synthesized according to the general procedure B stated above. **2b** (190.64 mg, 1.00 mmol), **3** (217.01 mg, 1.1 mmol) and MgO (161.20 mg, 4.00 mmol) were used, to afford **3b** as a white solid (309.28 mg, 0.88 mmol, 88%).

The title compound was synthesized according to the general procedure C stated above. **1b** (246.39 mg, 1.00 mmol), NaOCl\*5H<sub>2</sub>O (987.12 mg, 6.00 mmol), NaHSO<sub>4</sub> (12.01 mg, 0.10 mmol), **3** (434.02 mg, 2.2 mmol), MgO (161.20 mg, 4.00 mmol) were used, to afford **3b** as a white solid (618.57 mg, 1.76 mmol, 88%).

<sup>1</sup>H NMR (600 MHz, CDCl<sub>3</sub>): δ 7.76 – 7.75 (d, *J* = 7.9 Hz, 2H), 7.32 (d, *J* = 7.9 Hz, 2H), 7.23 – 7.22 (m, 6H), 7.08 – 7.06 (dd, *J* = 6.5, 3.1 Hz, 4H), 4.33 (s, 4H), 2.45 (s, 3H).

<sup>13</sup>C NMR (151 MHz, CDCl<sub>3</sub>): δ 143.4, 137.8, 135.8, 128.7, 128.6, 128.4, 127.8, 127.7, 50.7, 21.6.

M.P.: 75-77 °C

The spectroscopic data closely match the ones previously reported in the literature.<sup>6</sup>

*N,N*-Dibenzyl-4-(tert-butyl)benzenesulphonamide (**3c**)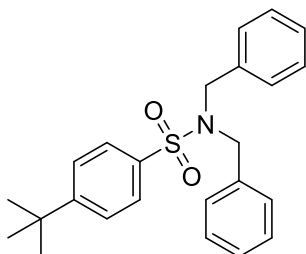

The title compound was synthesized according to the general procedure B stated above. **2c** (232.72 mg, 1.00 mmol), **3** (217.01 mg, 1.1 mmol) and MgO (161.20 mg, 4.00 mmol) were used, to afford **3c** as a white solid (334.52 mg, 0.85 mmol, 85%).

The title compound was synthesized according to the general procedure C stated above. **1c** (330.55 mg, 1.00 mmol), NaOCl\*5H<sub>2</sub>O (987.12 mg, 6.00 mmol), NaHSO<sub>4</sub> (12.01 mg, 0.10 mmol), **3** (434.02 mg, 2.2 mmol), MgO (161.20 mg, 4.00 mmol) were used, to afford **3c** as a white solid (669.04 mg, 1.70 mmol, 85%).

<sup>1</sup>H NMR (600 MHz, CDCl<sub>3</sub>) δ 7.78 – 7.76 (m, 2H), 7.52 – 7.50 (m, 2H), 7.22 – 7.18 (m, 6H), 7.04 – 7.01 (m, 4H), 4.33 (s, 4H), 1.37 (s, 9H).

<sup>13</sup>C NMR (151 MHz, CDCl<sub>3</sub>) δ 156.5, 137.9, 135.9, 128.7, 128.5, 127.8, 127.2, 126.2, 50.6, 35.3, 31.3.

**M.P.:** 79-81 °C

*N,N*-Dibenzyl-4-(nitro)benzenesulphonamide (**3d**)

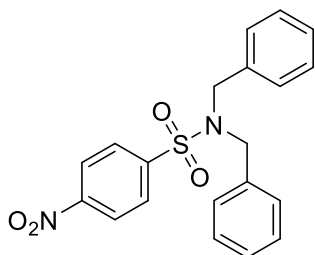

The title compound was synthesized according to the general procedure B stated above. **2d** (221.61 mg, 1.00 mmol), **3** (217.01 mg, 1.1 mmol) and MgO (161.20 mg, 4.00 mmol) were used, to afford **3d** as a brown solid (378.61 mg, 0.99 mmol, 99%).

The title compound was synthesized according to the general procedure C stated above. **1d** (308.33 mg, 1.00 mmol), NaOCl\*5H<sub>2</sub>O (987.12 mg, 6.00 mmol), NaHSO<sub>4</sub> (12.01 mg, 0.10 mmol), **3** (434.02 mg, 2.2 mmol), MgO (161.20 mg, 4.00 mmol) were used, to afford **3d** as a brown solid (757.21 mg, 1.98 mmol, 99%).

<sup>1</sup>H NMR (600 MHz, CDCl<sub>3</sub>) δ 8.29 – 8.27 (m, 2H), 7.92 – 7.91 (m, 2H), 7.26 – 7.25 (m, 6H), 7.10 – 7.08 (m, 4H), 4.35 (s, 4H).

<sup>13</sup>C NMR (151 MHz, CDCl<sub>3</sub>) δ 149.8, 146.8, 134.9, 128.7, 128.6, 128.3, 128.1, 124.2, 50.8.

**M.P.:** 126 – 127 °C

The spectroscopic data closely match the ones previously reported in the literature.<sup>7</sup>

*N,N*-Dibenzyl-3-(nitro)benzenesulphonamide (**3e**)

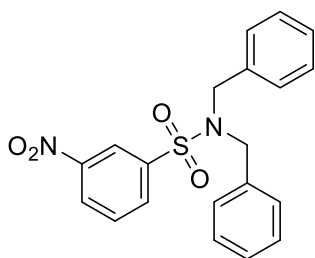

The title compound was synthesized according to the general procedure B stated above. **2e** (221.61 mg, 1.00 mmol), **3** (217.01 mg, 1.1 mmol) and MgO (161.20 mg, 4.00 mmol) were used, to afford **3e** as a brown solid (370.96 mg, 0.97 mmol, 97%).

The title compound was synthesized according to the general procedure C stated above. **1e** (308.33 mg, 1.00 mmol), NaOCl\*5H<sub>2</sub>O (987.12 mg, 6.00 mmol), NaHSO<sub>4</sub> (12.01 mg, 0.10 mmol), **3** (434.02 mg, 2.2 mmol), MgO (161.20 mg, 4.00 mmol) were used, to afford **3e** as a brown solid (741.91 mg, 1.94 mmol, 97%).

<sup>1</sup>H NMR (600 MHz, CDCl<sub>3</sub>) δ 8.55 – 8.52 (t, *J* = 2.0 Hz, 1H), 8.38 – 8.37 (ddd, *J* = 8.0, 2.0, 1.0 Hz, 1H), 8.07 – 8.06 (ddd, *J* = 8.0, 2.0, 1.0 Hz, 1H), 7.67 – 7.64 (t, *J* = 8.0 Hz, 1H), 7.28 – 7.26 (m, 6H), 7.15 – 7.13 (m, 4H), 4.44 (s, 4H).

<sup>13</sup>C NMR (151 MHz, CDCl<sub>3</sub>) δ 148.3, 143.3, 135.0, 132.6, 130.4, 128.8, 128.7, 128.3, 126.9, 122.4, 51.0.

**M.P.:** 105-106°C

*N,N*-Dibenzyl-4-(fluoro)benzenesulphonamide (**3g**)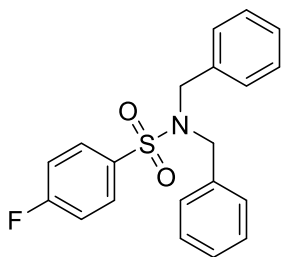

The title compound was synthesized according to the general procedure B stated above. **2g** (194.60 mg, 1.00 mmol), **3** (217.01 mg, 1.1 mmol) and MgO (161.20 mg, 4.00 mmol) were used, to afford **3g** as a white solid (351.88 mg, 0.99 mmol, 99%).

The title compound was synthesized according to the general procedure C stated above. **1g** (254.31 mg, 1.00 mmol), NaOCl\*5H<sub>2</sub>O (987.12 mg, 6.00 mmol), NaHSO<sub>4</sub> (12.01 mg, 0.10 mmol), **3** (434.02 mg, 2.2 mmol), MgO (161.20 mg, 4.00 mmol) were used, to afford **3g** as a white solid (703.75 mg, 1.98 mmol, 99%).

<sup>1</sup>H NMR (600 MHz, CDCl<sub>3</sub>): δ 7.84 – 7.81 (m, 2H), 7.26 – 7.22 (m, 6H), 7.18 – 7.14 (m, 2H), 7.07 – 7.06 (m, 4H), 4.34 (s, 4H).

<sup>13</sup>C NMR (151 MHz, CDCl<sub>3</sub>): δ 165.1 (d, *J*<sub>C-F</sub> = 255.2 Hz), 137.1, 137.0, 135.5, 130.0 (d, *J*<sub>C-F</sub> = 15.1 Hz), 128.7, 127.9, 116.4 (d, *J*<sub>C-F</sub> = 30.2 Hz), 50.6.

**M.P.:** 89-90 °C

The spectroscopic data closely match the ones previously reported in the literature.<sup>8</sup>

*N,N*-dibenzyl-4-(chloro)benzenesulphonamide (**3h**)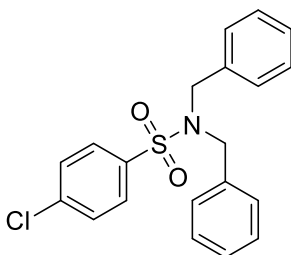

The title compound was synthesized according to the general procedure B stated above. **2h** (211.06 mg, 1.00 mmol), **3** (217.01 mg, 1.1 mmol) and MgO (161.20 mg, 4.00 mmol) were used, to afford **3h** as a white solid (345.85 mg, 0.93 mmol, 93%).

The title compound was synthesized according to the general procedure C stated above. **1h** (287.22 mg, 1.00 mmol), NaOCl\*5H<sub>2</sub>O (987.12 mg, 6.00 mmol), NaHSO<sub>4</sub> (12.01 mg, 0.10 mmol), **3** (434.02 mg, 2.2 mmol), MgO (161.20 mg, 4.00 mmol) were used, to afford **3h** as a white solid (691.70 mg, 1.86 mmol, 93%).

<sup>1</sup>H NMR (600 MHz, CDCl<sub>3</sub>) δ 7.75 – 7.73 (m, 2H), 7.46 – 7.45 (m, 2H), 7.26 – 7.23 (m, 6H), 7.07 – 7.06 (m, 4H), 4.33 (s, 4H).

<sup>13</sup>C NMR (151 MHz, CDCl<sub>3</sub>) δ 139.2, 138.8, 135.3, 129.3, 128.7, 128.6, 128.5, 127.9, 50.6.

**M.P.:** 92 °C

The spectroscopic data closely match the ones previously reported in the literature.<sup>9</sup>

*N,N*-Dibenzyl-4-(trifluoromethyl)benzenesulphonamide (**3i**)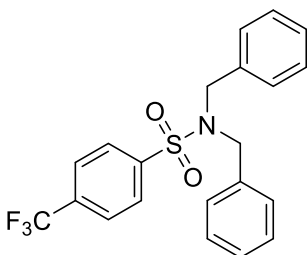

The title compound was synthesized according to the general procedure B stated above. **2i** (244.61 mg, 1.00 mmol), **3** (217.01 mg, 1.1 mmol) and MgO (161.20 mg, 4.00 mmol) were used, to afford **3i** as a white solid (381.11 mg, 0.94 mmol, 94%).

The title compound was synthesized according to the general procedure C stated above. **1i** (354.33 mg, 1.00 mmol), NaOCl\*5H<sub>2</sub>O (987.12 mg, 6.00 mmol), NaHSO<sub>4</sub> (12.01 mg, 0.10 mmol), **3** (434.02 mg, 2.2 mmol), MgO (161.20 mg, 4.00 mmol) were used, to afford **3i** as a white solid (762.23 mg, 1.88 mmol, 94%).

<sup>1</sup>H NMR (600 MHz, CDCl<sub>3</sub>) δ 7.90 – 7.89 (d, *J* = 8.1 Hz, 2H), 7.72 – 7.71 (d, *J* = 8.1 Hz, 2H), 7.24 – 7.20 (dd, *J* = 5.1, 2.0 Hz, 6H), 7.07 – 7.05 (m, 4H), 4.37 (s, 4H).

$^{13}\text{C}$  NMR (151 MHz,  $\text{CDCl}_3$ )  $\delta$  144.6, 135.2, 134.2 (q,  $J_{\text{C-F}} = 287$  Hz), 128.3 (q,  $J_{\text{C-F}} = 136$  Hz), 126.3, 126.1, 126.0, 124.3, 122.5, 50.8.

**M.P.:** 91 - 92 °C

*N,N*-Dibenzyl-4-(methoxy)benzenesulphonamide (**3j**)

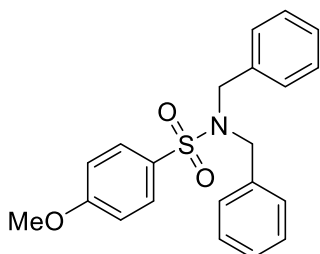

The title compound was synthesized according to the general procedure B stated above. **2j** (206.64 mg, 1.00 mmol), **3** (217.01 mg, 1.1 mmol) and MgO (161.20 mg, 4.00 mmol) were used, to afford **3j** as a white solid (304.99 mg, 0.94 mmol, 94%).

The title compound was synthesized according to the general procedure C stated above. **1j** (278.38 mg, 1.00 mmol), NaOCl\*5H<sub>2</sub>O (987.12 mg, 6.00 mmol), NaHSO<sub>4</sub> (12.01 mg, 0.10 mmol), **3** (434.02 mg, 2.2 mmol), MgO (161.20 mg, 4.00 mmol) were used, to afford **3j** as a white solid (609.98 mg, 1.66 mmol, 94%).

$^1\text{H}$  NMR (600 MHz,  $\text{CDCl}_3$ )  $\delta$  7.79 – 7.78 (m, 2H), 7.26 – 7.21 (m, 6H), 7.07 – 7.06 (m, 4H), 6.98 – 6.96 (m, 2H), 4.31 (s, 4H), 3.89 (s, 3H).

$^{13}\text{C}$  NMR (151 MHz,  $\text{CDCl}_3$ )  $\delta$  162.9, 135.9, 132.6, 129.5, 128.7, 128.5, 127.9, 114.4, 55.8, 50.6.

**M.P.:** 63-65 °C

The spectroscopic data closely match the ones previously reported in the literature.<sup>10</sup>

*N*-Benzyl-benzenesulphonamide (**4a**)

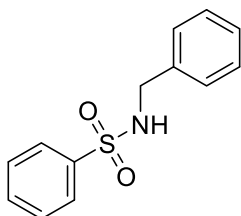

The title compound was synthesized according to the general procedure B stated above. **2a** (176.61 mg, 1.00 mmol), **4** (117.87 mg, 1.1 mmol) and MgO (161.20 mg, 4.00 mmol) were used, to afford **4a** as a white solid (244.84 mg, 0.99 mmol, 99%).

The title compound was synthesized according to the general procedure C stated above. **1a** (218.33 mg, 1.00 mmol), NaOCl\*5H<sub>2</sub>O (987.12 mg, 6.00 mmol), NaHSO<sub>4</sub> (12.01 mg, 0.10 mmol), **4** (235.73 mg, 2.2 mmol), MgO (161.20 mg, 4.00 mmol) were used, to afford **4a** as a white solid (489.68 mg, 1.98 mmol, 99%).

$^1\text{H}$  NMR (600 MHz,  $\text{CDCl}_3$ )  $\delta$  7.85 – 7.83 (m, 2H), 7.56 – 7.54 (m, 1H), 7.53 – 7.51 (m, 2H), 7.50 – 7.47 (m, 3H), 7.46 – 7.45 (m, 2H), 5.23 – 5.21 (t,  $J = 6.3$  Hz, 1H), 4.11 – 4.10 (d,  $J = 6.3$  Hz, 2H).

$^{13}\text{C}$  NMR (151 MHz,  $\text{CDCl}_3$ )  $\delta$  140.0, 136.4, 132.7, 129.2, 128.7, 127.9, 127.8, 127.1, 47.3.

**M.P.:** 85-86 °C

The spectroscopic data closely match the ones previously reported in the literature.<sup>11</sup>

*N*-benzyl-4-(methyl)benzenesulphonamide (**4b**)

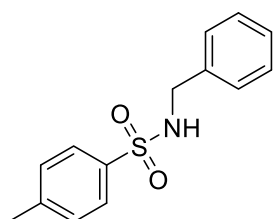

The title compound was synthesized according to the general procedure B stated above. **2b** (190.64 mg, 1.00 mmol), **4** (117.87 mg, 1.1 mmol) and MgO (161.20 mg, 4.00 mmol) were used, to afford **4b** as a white solid (240.43 mg, 0.92 mmol, 92%).

The title compound was synthesized according to the general procedure C stated above. **1b** (246.39 mg, 1.00 mmol), NaOCl\*5H<sub>2</sub>O (987.12 mg, 6.00 mmol), NaHSO<sub>4</sub>

(12.01 mg, 0.10 mmol), **4** (235.73 mg, 2.2 mmol), MgO (161.20 mg, 4.00 mmol) were used, to afford **4b** as a white solid (480.87 mg, 1.84 mmol, 92%).

<sup>1</sup>H NMR (600 MHz, CDCl<sub>3</sub>) δ 7.79 – 7.77 (m, 2H), 7.34 – 7.32 (m, 3H), 7.30 – 7.29 (m, 2H), 7.28 – 7.27 (m, 2H), 4.63 – 4.61 (s, 1H), 4.15 – 4.14 (d, *J* = 5.9 Hz, 2H), 2.46 (s, 3H).

<sup>13</sup>C NMR (151 MHz, CDCl<sub>3</sub>) δ 143.7, 137.0, 136.4, 129.9, 128.8, 128.1, 128.0, 127.4, 47.5, 21.7.

**M.P.:** 112 – 113 °C

The spectroscopic data closely match the ones previously reported in the literature.<sup>11</sup>

#### *N*-Benzyl-4-(*tert*-butyl)benzenesulphonamide (**4c**)

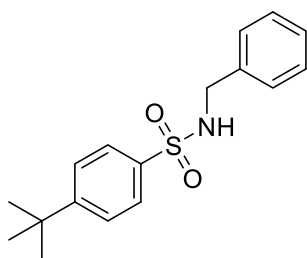

The title compound was synthesized according to the general procedure B stated above. **2c** (232.72 mg, 1.00 mmol), **4** (117.87 mg, 1.1 mmol) and MgO (161.20 mg, 4.00 mmol) were used, to afford **4c** as a white solid (276.11 mg, 0.91 mmol, 91%).

The title compound was synthesized according to the general procedure C stated above. **1c** (330.55 mg, 1.00 mmol), NaOCl\*5H<sub>2</sub>O (987.12 mg, 6.00 mmol), NaHSO<sub>4</sub> (12.01 mg, 0.10 mmol), **4** (235.73 mg, 2.2 mmol), MgO (161.20 mg, 4.00 mmol) were used, to afford **4c** as a white solid (552.22 mg, 1.82 mmol, 91%).

<sup>1</sup>H NMR (600 MHz, CDCl<sub>3</sub>) δ 7.82 – 7.79 (m, 2H), 7.54 – 7.52 (m, 2H), 7.30 – 7.29 (m, 3H), 7.28 – 7.26 (m, 2H), 4.63 (s, 1H), 4.18 – 4.17 (d, *J* = 4.8 Hz, 2H), 1.37 (s, 9H).

<sup>13</sup>C NMR (151 MHz, CDCl<sub>3</sub>) δ 156.7, 137.0, 136.4, 128.8, 128.0, 127.9, 127.1, 126.3, 47.5, 35.3, 31.2.

**M.P.:** 110 °C

The spectroscopic data closely match the ones previously reported in the literature.<sup>12</sup>

#### *N*-benzyl-4-(nitro)benzenesulphonamide (**4d**)

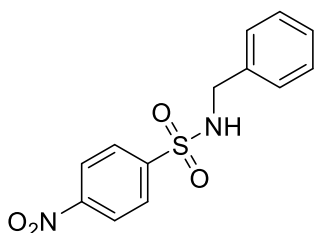

The title compound was synthesized according to the general procedure B stated above. **2d** (221.61 mg, 1.00 mmol), **4** (117.87 mg, 1.1 mmol) and MgO (161.20 mg, 4.00 mmol) were used, to afford **4d** as a brown solid (289.39 mg, 0.99 mmol, 99%).

The title compound was synthesized according to the general procedure C stated above. **1d** (308.33 mg, 1.00 mmol), NaOCl\*5H<sub>2</sub>O (987.12 mg, 6.00 mmol), NaHSO<sub>4</sub> (12.01 mg, 0.10 mmol), **4** (235.73 mg, 2.2 mmol), MgO (161.20 mg, 4.00 mmol) were used, to afford **4d** as a brown solid (578.77 mg, 1.98 mmol, 99%).

<sup>1</sup>H NMR (600 MHz, CDCl<sub>3</sub>) δ 8.31 – 8.30 (m, 2H), 8.00 – 7.99 (m, 2H), 7.27 – 7.26 (m, 3H), 7.18 – 7.16 (m, 2H), 4.97 (t, *J* = 6.0 Hz, 1H), 4.24 – 4.23 (d, *J* = 6.0 Hz, 2H).

<sup>13</sup>C NMR (151 MHz, CDCl<sub>3</sub>) δ 150.1, 146.2, 135.6, 129.0, 128.5, 128.4, 128.0, 124.5, 47.6.

**M.P.:** 124-126 °C.

The spectroscopic data closely match the ones previously reported in the literature.<sup>13</sup>



*N*-Benzyl-2-nitrobenzenesulfonamide (**4f**)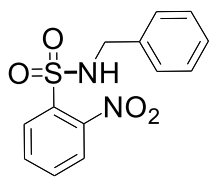

The title compound was synthesized according to the general procedure B stated above. **2f** (221.61 mg, 1.00 mmol), **4** (117.87 mg, 1.1 mmol) and MgO (161.20 mg, 4.00 mmol) were used, to afford **4d** as a brown solid (222.16 mg, 0.76 mmol, 76%).

The title compound was synthesized according to the general procedure C stated above. **1d** (308.33 mg, 1.00 mmol), NaOCl\*5H<sub>2</sub>O (987.12 mg, 6.00 mmol), NaHSO<sub>4</sub> (12.01 mg, 0.10 mmol), **4** (235.73 mg, 2.2 mmol), MgO (161.20 mg, 4.00 mmol) were used, to afford **4d** as a brown solid (444.31 mg, 1.52 mmol, 76%).

<sup>1</sup>H NMR (600 MHz, CDCl<sub>3</sub>) δ 8.05 – 8.03 (dd, *J* = 7.7, 1.6 Hz, 1 H), 7.86 – 7.84 (dd, *J* = 7.7, 1.6 Hz, 1 H), 7.68 – 7.65 (dd, *J* = 7.7, 1.6 Hz, 2 H), 7.25–7.18 (m, 5 H), 5.72 (t, *J* = 6.0 Hz, 1 H), 4.32 (d, *J* = 6.0 Hz, 2 H).

<sup>13</sup>C NMR (151 MHz, CDCl<sub>3</sub>) δ 147.6, 135.9, 134.1, 133.6, 133.4, 129.8, 128.9, 127.7, 127.6, 125.2, 47.7.

**M.P.:** 43-44 °C.

*N*-Benzyl-4-(fluoro)benzenesulphonamide (**4g**)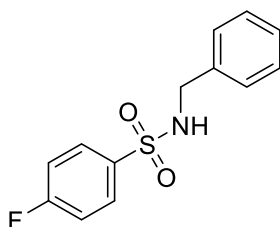

The title compound was synthesized according to the general procedure B stated above. **2g** (194.60 mg, 1.00 mmol), **4** (117.87 mg, 1.1 mmol) and MgO (161.20 mg, 4.00 mmol) were used, to afford **4g** as a white solid (257.34 mg, 0.97 mmol, 97%).

The title compound was synthesized according to the general procedure C stated above. **1g** (254.31 mg, 1.00 mmol), NaOCl\*5H<sub>2</sub>O (987.12 mg, 6.00 mmol), NaHSO<sub>4</sub> (12.01 mg, 0.10 mmol), **4** (235.73 mg, 2.2 mmol), MgO (161.20 mg, 4.00 mmol) were used, to afford **4g** as a white solid (514.68 mg, 1.94 mmol, 97%).

<sup>1</sup>H NMR (600 MHz, CDCl<sub>3</sub>) δ 7.88 – 7.86 (m, 2H), 7.28 – 7.26 (m, 3H), 7.19 – 7.16 (m, 4H), 4.74 – 4.72 (t, *J* = 6.1 Hz, 1H), 4.17 – 4.16 (d, *J* = 6.1 Hz, 2H).

<sup>13</sup>C NMR (151 MHz, CDCl<sub>3</sub>) δ 166.3 (d, *J*<sub>C-F</sub> = 256.7 Hz), 136.1, 130.0, 129.9 (d, *J*<sub>C-F</sub> = 15.1 Hz), 128.1 (d, *J*<sub>C-F</sub> = 30.2 Hz), 127.9, 116.5, 116.4, 47.5.

**M.P.:** 99 °C

The spectroscopic data closely match the ones previously reported in the literature.<sup>11,12</sup>

*N*-Benzyl-4-(chloro)benzenesulphonamide (**4h**)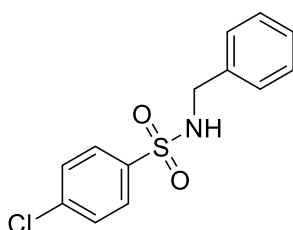

The title compound was synthesized according to the general procedure B stated above. **2h** (194.60 mg, 1.00 mmol), **4** (117.87 mg, 1.1 mmol) and MgO (161.20 mg, 4.00 mmol) were used, to afford **4h** as a white solid (267.66 mg, 0.95 mmol, 95%).

The title compound was synthesized according to the general procedure C stated above. **1h** (254.31 mg, 1.00 mmol), NaOCl\*5H<sub>2</sub>O (987.12 mg, 6.00 mmol), NaHSO<sub>4</sub> (12.01 mg, 0.10 mmol), **4** (235.73 mg, 2.2 mmol), MgO (161.20 mg, 4.00 mmol) were used, to afford **4h** as a white solid (535.33 mg, 1.90 mmol, 95%).

<sup>1</sup>H NMR (600 MHz, CDCl<sub>3</sub>) δ 7.79 – 7.77 (m, 2H), 7.47 – 7.46 (m, 2H), 7.28 – 7.26 (m, 3H), 7.19 – 7.17 (m, 2H), 4.76 (m, 1H), 4.16 – 4.15 (d, *J* = 6.2 Hz, 2H).

<sup>13</sup>C NMR (151 MHz, CDCl<sub>3</sub>) δ 139.2, 138.6, 135.9, 129.4, 128.8, 128.6, 128.1, 127.9, 47.3.

**M.P.:** 108-109 °C

The spectroscopic data closely match the ones previously reported in the literature.<sup>11</sup>

*N*-Benzyl-4-(trifluoromethyl)benzenesulphonamide (**4i**)

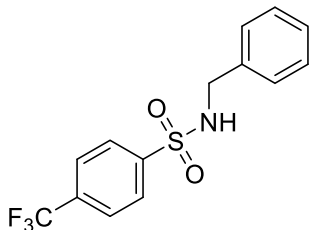

The title compound was synthesized according to the general procedure B stated above. **2i** (244.61 mg, 1.00 mmol), **4** (117.87 mg, 1.1 mmol) and MgO (161.20 mg, 4.00 mmol) were used, to afford **4i** as a white solid (302.70 mg, 0.96 mmol, 96%).

The title compound was synthesized according to the general procedure C stated above. **1i** (354.33 mg, 1.00 mmol), NaOCl\*5H<sub>2</sub>O (987.12 mg, 6.00 mmol), NaHSO<sub>4</sub> (12.01 mg, 0.10 mmol), **4** (235.73 mg, 2.2 mmol), MgO (161.20 mg, 4.00 mmol) were used, to afford **4i** as a white solid (605.40 mg, 1.92 mmol, 96%).

<sup>1</sup>H NMR (600 MHz, CDCl<sub>3</sub>) δ 7.97 – 7.95 (m, 2H), 7.76 – 7.74 (m, 2H), 7.29 – 7.25 (m, 3H), 7.18 – 7.16 (m, 2H), 4.79 – 4.77 (t, *J* = 6.0 Hz, 1H), 4.21 – 4.20 (d, *J* = 6.0 Hz, 2H).

<sup>13</sup>C NMR (151 MHz, CDCl<sub>3</sub>) δ 143.9, 135.8, 134.6 (q, *J*<sub>C-F</sub> = 35.0 Hz), 128.9, 128.4, 128.0, 127.7, 126.3 (q, *J*<sub>C-F</sub> = 135.9 Hz), 124.3, 47.6.

**M.P.:** 121 - 122 °C

The spectroscopic data closely match the ones previously reported in the literature.<sup>8,11,12</sup>

*N*-Benzyl-4-(methoxy)benzenesulphonamide (**4j**)

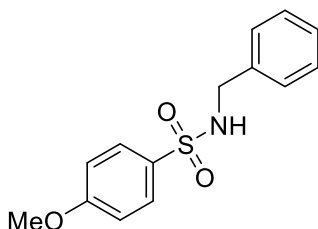

The title compound was synthesized according to the general procedure B stated above. **2j** (206.64 mg, 1.00 mmol), **4** (117.87 mg, 1.1 mmol) and MgO (161.20 mg, 4.00 mmol) were used, to afford **4j** as a white solid (246.83 mg, 0.89 mmol, 89%).

The title compound was synthesized according to the general procedure C stated above. **1j** (278.38 mg, 1.00 mmol), NaOCl\*5H<sub>2</sub>O (987.12 mg, 6.00 mmol), NaHSO<sub>4</sub> (12.01 mg, 0.10 mmol), **4** (235.73 mg, 2.2 mmol), MgO (161.20 mg, 4.00 mmol) were used, to afford **4j** as a white solid (605.40 mg, 1.78 mmol, 89%).

<sup>1</sup>H NMR (600 MHz, CDCl<sub>3</sub>) δ 7.82 – 7.81 (m, 2H), 7.30 – 7.21 (m, 3H), 7.20 – 7.19 (m, 2H), 6.99 – 6.97 (m, 2H), 4.57 – 4.56 (t, *J* = 6.3 Hz, 1H), 4.13 – 4.12 (d, *J* = 6.3 Hz, 2H), 3.88 (s, 3H).

<sup>13</sup>C NMR (151 MHz, CDCl<sub>3</sub>) δ 163.1, 136.4, 131.6, 129.5, 128.9, 128.1, 128.0, 114.5, 55.9, 47.4.

**M.P.:** 108-109 °C.

The spectroscopic data closely match the ones previously reported in the literature.<sup>13</sup>

*N*-Benzylpropane-2-sulfonamide (**4l**)

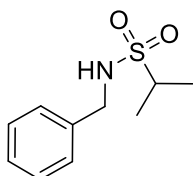

The title compound was synthesized according to the general procedure B stated above. **2l** (142.60 mg, 1.00 mmol), **4** (117.87 mg, 1.1 mmol) and MgO (161.20 mg, 4.00 mmol) were used, to afford **4l** as a white solid (196.24 mg, 0.92 mmol, 92%).

The title compound was synthesized according to the general procedure C stated above. **1l** (150.30 mg, 1.00 mmol), NaOCl\*5H<sub>2</sub>O (987.12 mg, 6.00 mmol), NaHSO<sub>4</sub> (12.01 mg, 0.10

mmol), **4** (235.73 mg, 2.2 mmol), MgO (161.20 mg, 4.00 mmol) were used, to afford **4l** as a white solid (392.47 mg, 1.84 mmol, 92%).

<sup>1</sup>H NMR (600 MHz, CDCl<sub>3</sub>) δ 7.27 – 7.19 (m, 5H), 4.82 (s, 1H), 4.21 (s, 2H), 3.01 – 2.94 (p, *J* = 6.8 Hz, 1H), 1.25 – 1.24 (d, *J* = 6.8 Hz, 6H).

<sup>13</sup>C NMR (151 MHz, CDCl<sub>3</sub>) δ 137.5, 128.8, 128.0, 127.9, 53.9, 47.5, 16.6.

**M.P.:** 98-100 °C.

The spectroscopic data closely match the ones previously reported in the literature.<sup>13</sup>

#### *N*-Benzyl-2,4,6-trimethylbenzenesulfonamide (**4m**)

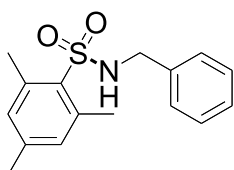

The title compound was synthesized according to the general procedure B stated above. **2m** (218.70 mg, 1.00 mmol), **4** (117.87 mg, 1.1 mmol) and MgO (161.20 mg, 4.00 mmol) were used, to afford **4m** as a white solid (252.01 mg, 0.87 mmol, 87%).

The title compound was synthesized according to the general procedure C stated above.

**1m** (302.49 mg, 1.00 mmol), NaOCl\*5H<sub>2</sub>O (987.12 mg, 6.00 mmol), NaHSO<sub>4</sub> (12.01 mg, 0.10 mmol), **4** (235.73 mg, 2.2 mmol), MgO (161.20 mg, 4.00 mmol) were used, to afford **4m** as a white solid (504.02 mg, 1.74 mmol, 87%).

<sup>1</sup>H NMR (600 MHz, CDCl<sub>3</sub>) δ 7.28 – 7.24 (m, 3H), 7.19 – 7.18 (m, 2H), 6.97 (s, 2H), 4.84 (t, *J* = 6.4 Hz, 1H), 4.08 (d, *J* = 6.4 Hz, 2H), 2.65 (s, 6H), 2.33 (s, 3H).

<sup>13</sup>C NMR (151 MHz, CDCl<sub>3</sub>) δ 142.4, 139.3, 136.52, 132.1, 128.7, 128.0, 127.9, 46.9, 23.0, 21.0.

**M.P.:** 98-100 °C.

#### *N*-Benzylpyridine-2-sulfonamide (**4n**)

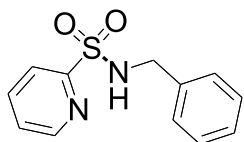

The title compound was synthesized according to the general procedure B stated above. **2n** (177.60 mg, 1.00 mmol), **4** (117.87 mg, 1.1 mmol) and MgO (161.20 mg, 4.00 mmol) were used, to afford **4n** as a white solid (252.01 mg, 0.87 mmol, 61%).

The title compound was synthesized according to the general procedure C stated above.

**1m** (302.49 mg, 1.00 mmol), NaOCl\*5H<sub>2</sub>O (987.12 mg, 6.00 mmol), NaHSO<sub>4</sub> (12.01 mg, 0.10 mmol), **4** (235.73 mg, 2.2 mmol), MgO (161.20 mg, 4.00 mmol) were used, to afford **4n** as a white solid (504.02 mg, 1.74 mmol, 61%).

<sup>1</sup>H NMR (600 MHz, CDCl<sub>3</sub>) δ 8.67 – 8.66 (m, 1H), 7.99 – 7.98 (d, *J* = 7.8 Hz, 1H), 7.90 – 7.88 (t, *J* = 7.8 Hz, 1H), 7.49 – 7.47 (m, 1H), 7.27 (s, 2H), 7.26 – 7.24 (m, 3H), 5.21 (bs, 1H), 4.27 (s, 2H).

<sup>13</sup>C NMR (151 MHz, CDCl<sub>3</sub>) δ 157.7, 150.2, 138.1, 136.4, 128.8, 128.1, 127.5, 126.8, 122.4, 48.0.

**M.P.:** 99 °C.

*N*-Phenylethyl-benzenesulphonamide (**5a**)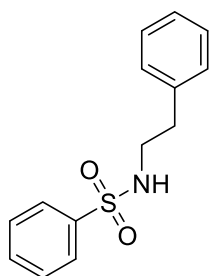

The title compound was synthesized according to the general procedure B stated above. **2a** (176.61 mg, 1.00 mmol), **5** (133.30 mg, 1.1 mmol) and MgO (161.20 mg, 4.00 mmol) were used, to afford **5a** as a white solid (237.82 mg, 0.91 mmol, 91%).

The title compound was synthesized according to the general procedure C stated above. **1a** (218.33 mg, 1.00 mmol), NaOCl\*5H<sub>2</sub>O (987.12 mg, 6.00 mmol), NaHSO<sub>4</sub> (12.01 mg, 0.10 mmol), **5** (266.60 mg, 2.2 mmol), MgO (161.20 mg, 4.00 mmol) were used, to afford **5a** as a white solid (475.64 mg, 1.82 mmol, 91%).

<sup>1</sup>H NMR (600 MHz, CDCl<sub>3</sub>) δ 7.82 – 7.80 (m, 2H), 7.59 – 7.56 (m, 1H), 7.52 – 7.49 (m, 2H), 7.29 – 7.22 (m, 2H), 7.08 – 7.07 (m, 3H), 4.33 (s, 1H), 3.26 – 3.23 (q, *J* = 6.7 Hz, 2H), 2.78 – 2.76 (t, *J* = 6.7 Hz, 2H).

<sup>13</sup>C NMR (151 MHz, CDCl<sub>3</sub>) δ 140.1, 137.7, 132.8, 129.3, 128.9, 128.8, 127.2, 127.0, 44.3, 36.0.

**M.P.:** 63-66 °C.

The spectroscopic data closely match the ones previously reported in the literature.<sup>14</sup>

*N*-Phenylethyl-4-(methyl)benzenesulphonamide (**5b**)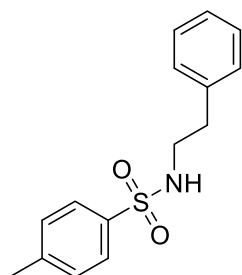

The title compound was synthesized according to the general procedure B stated above. **2b** (190.64 mg, 1.00 mmol), **5** (133.30 mg, 1.1 mmol) and MgO (161.20 mg, 4.00 mmol) were used, to afford **5b** as a white solid (247.83 mg, 0.90 mmol, 90%).

The title compound was synthesized according to the general procedure C stated above. **1b** (246.39 mg, 1.00 mmol), NaOCl\*5H<sub>2</sub>O (987.12 mg, 6.00 mmol), NaHSO<sub>4</sub> (12.01 mg, 0.10 mmol), **5** (266.60 mg, 2.2 mmol), MgO (161.20 mg, 4.00 mmol) were used, to afford **5b** as a white solid (495.67 mg, 1.80 mmol, 90%).

<sup>1</sup>H NMR (600 MHz, CDCl<sub>3</sub>) δ 7.70 – 7.69 (d, *J* = 7.9 Hz, 2H), 7.27 – 7.25 (d, *J* = 7.9 Hz, 4H), 7.23 – 7.18 (t, *J* = 7.3 Hz, 1H), 7.07 – 7.06 (d, *J* = 7.3 Hz, 2H), 4.88 (d, *J* = 6.8 Hz, 1H), 3.19 – 3.18 (q, *J* = 6.8 Hz, 2H), 2.75 – 2.74 (t, *J* = 6.8 Hz, 2H), 2.40 (s, 3H).

<sup>13</sup>C NMR (151 MHz, CDCl<sub>3</sub>) δ 143.4, 137.9, 137.0, 129.8, 128.8, 128.7, 127.1, 126.7, 44.3, 35.9, 21.5.

**M.P.:** 63-66 °C.

The spectroscopic data closely match the ones previously reported in the literature.<sup>14</sup>

*N*-Phenylethyl-4-(tert-butyl)benzenesulphonamide (**5c**)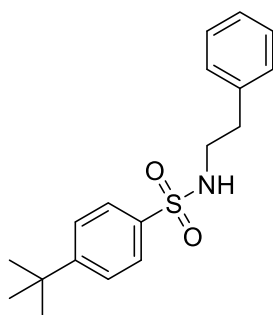

The title compound was synthesized according to the general procedure B stated above. **2c** (232.72 mg, 1.00 mmol), **5** (133.30 mg, 1.1 mmol) and MgO (161.20 mg, 4.00 mmol) were used, to afford **5c** as a white solid (279.36 mg, 0.88 mmol, 88%).

The title compound was synthesized according to the general procedure C stated above. **1c** (330.55 mg, 1.00 mmol), NaOCl\*5H<sub>2</sub>O (987.12 mg, 6.00 mmol), NaHSO<sub>4</sub> (12.01 mg, 0.10 mmol), **5** (266.60 mg, 2.2 mmol), MgO (161.20 mg, 4.00 mmol) were used, to afford **5c** as a white solid (558.71 mg, 1.76 mmol, 88%).

**<sup>1</sup>H NMR** (600 MHz, CDCl<sub>3</sub>) δ 7.74 – 7.72 (d, *J* = 8.2 Hz, 2H), 7.49 – 7.48 (d, *J* = 8.2 Hz, 2H), 7.26 – 7.25 (d, *J* = 7.3 Hz, 2H), 7.24 – 7.20 (t, *J* = 7.3 Hz, 1H), 7.08 – 7.07 (m, 1H), 4.72 – 4.71 (t, *J* = 6.2 Hz, 2H), 3.23 – 3.20 (q, *J* = 6.8 Hz, 2H), 2.78 – 2.76 (t, *J* = 6.8 Hz, 2H), 1.34 (s, 9H).

**<sup>13</sup>C NMR** (151 MHz, CDCl<sub>3</sub>) δ 156.5, 137.9, 136.9, 128.8, 128.7, 127.0, 126.8, 126.1, 44.3, 35.9, 35.2, 31.2.

**M.P.:** 112 °C.

The spectroscopic data closely match the ones previously reported in the literature.<sup>15</sup>

#### *N*-Phenylethyl-4-(nitro)benzenesulphonamide (**5d**)

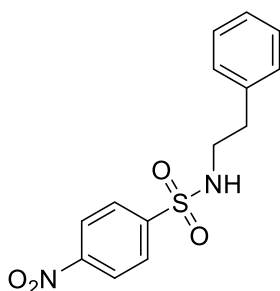

The title compound was synthesized according to the general procedure B stated above. **2d** (221.61 mg, 1.00 mmol), **5** (133.30 mg, 1.1 mmol) and MgO (161.20 mg, 4.00 mmol) were used, to afford **5d** as a brown solid (303.28 mg, 0.99 mmol, 99%).

The title compound was synthesized according to the general procedure C stated above. **1d** (308.33 mg, 1.00 mmol), NaOCl·5H<sub>2</sub>O (987.12 mg, 6.00 mmol), NaHSO<sub>4</sub> (12.01 mg, 0.10 mmol), **5** (266.60 mg, 2.2 mmol), MgO (161.20 mg, 4.00 mmol) were used, to afford **5d** as a brown solid (606.55 mg, 1.76 mmol, 99%).

**<sup>1</sup>H NMR** (600 MHz, CDCl<sub>3</sub>) δ 8.28 – 8.26 (m, 2H), 7.95 – 7.93 (m, 2H), 7.25 – 7.24 (m, 3H), 7.23 – 7.18 (m, 2H), 5.14 – 5.12 (t, *J* = 6.0 Hz, 1H), 3.30 – 3.27 (q, *J* = 6.7 Hz, 2H), 2.80 – 2.78 (t, *J* = 6.9 Hz, 2H).

**<sup>13</sup>C NMR** (151 MHz, CDCl<sub>3</sub>) δ 150.0, 145.8, 137.4, 128.8, 128.7, 128.3, 127.0, 124.4, 44.4, 35.9.

**M.P.:** 95°C.

The spectroscopic data closely match the ones previously reported in the literature.<sup>16</sup>

#### *N*-Phenylethyl-4-(fluoro)benzenesulphonamide (**5g**)

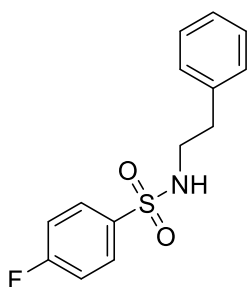

The title compound was synthesized according to the general procedure B stated above. **2g** (232.72 mg, 1.00 mmol), **5** (133.30 mg, 1.1 mmol) and MgO (161.20 mg, 4.00 mmol) were used, to afford **5g** as a white solid (273.74 mg, 0.98 mmol, 98%).

The title compound was synthesized according to the general procedure C stated above. **1g** (330.55 mg, 1.00 mmol), NaOCl·5H<sub>2</sub>O (987.12 mg, 6.00 mmol), NaHSO<sub>4</sub> (12.01 mg, 0.10 mmol), **5** (266.60 mg, 2.2 mmol), MgO (161.20 mg, 4.00 mmol) were used, to afford **5c** as a white solid (547.49 mg, 1.96 mmol, 98%).

**<sup>1</sup>H NMR** (600 MHz, CDCl<sub>3</sub>) δ 7.82 – 7.80 (m, 2H), 7.27 – 7.26 (m, 3H), 7.16 – 7.13 (t, *J* = 8.5 Hz, 2H), 7.09 – 7.07 (m, 2H), 4.80 (s, 1H), 3.23 – 3.21 (t, *J* = 7.0 Hz, 2H), 2.78 – 2.76 (t, *J* = 7.0 Hz, 2H).

**<sup>13</sup>C NMR** (151 MHz, CDCl<sub>3</sub>) δ 165.1 (d, *J*<sub>C-F</sub> = 135.9 Hz), 137.7, 136.1, 129.8 (d, *J*<sub>C-F</sub> = 271.8 Hz), 128.9, 128.8, 126.9, 116.5 (d, *J*<sub>C-F</sub> = 15.1 Hz), 44.3, 35.9.

**M.P.:** 81-83 °C.

The spectroscopic data closely match the ones previously reported in the literature.<sup>14</sup>

*N*-Phenylethyl-4-(chloro)benzenesulphonamide (**5h**)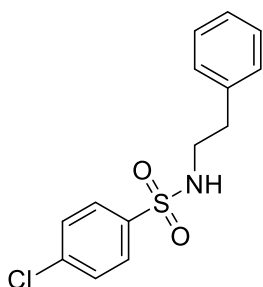

The title compound was synthesized according to the general procedure B stated above. **2h** (211.06 mg, 1.00 mmol), **5** (133.30 mg, 1.1 mmol) and MgO (161.20 mg, 4.00 mmol) were used, to afford **5h** as a white solid (275.10 mg, 0.93 mmol, 93%).

The title compound was synthesized according to the general procedure C stated above. **1h** (287.22 mg, 1.00 mmol), NaOCl\*5H<sub>2</sub>O (987.12 mg, 6.00 mmol), NaHSO<sub>4</sub> (12.01 mg, 0.10 mmol), **5** (266.60 mg, 2.2 mmol), MgO (161.20 mg, 4.00 mmol) were used, to afford **5h** as a white solid (550.20 mg, 1.86 mmol, 93%).

<sup>1</sup>H NMR (600 MHz, CDCl<sub>3</sub>) δ 7.72 – 7.71 (m, 2H), 7.42 – 7.40 (m, 2H), 7.24 – 7.20 (m, 2H), 7.19 – 7.18 (m, 1H), 7.07 – 7.05 (m, 2H), 5.14 – 5.13 (t, *J* = 6.3 Hz, 1H), 3.21 – 3.17 (q, *J* = 6.7 Hz, 2H), 2.76 – 2.74 (t, *J* = 6.9 Hz, 2H).

<sup>13</sup>C NMR (151 MHz, CDCl<sub>3</sub>) δ 139.0, 138.4, 137.9, 129.4, 128.7, 128.5, 126.8, 44.4, 44.3 35.8.

**M.P.:** 101 °C

The spectroscopic data closely match the ones previously reported in the literature.<sup>14</sup>

*N*-Phenylethyl-4-(trifluoromethyl)benzenesulphonamide (**5i**)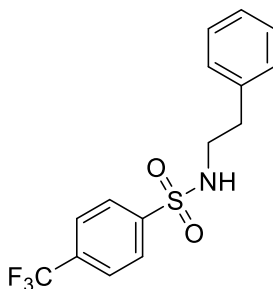

The title compound was synthesized according to the general procedure B stated above. **2h** (244.61 mg, 1.00 mmol), **5** (133.30 mg, 1.1 mmol) and MgO (161.20 mg, 4.00 mmol) were used, to afford **5h** as a white solid (312.87 mg, 0.95 mmol, 95%).

The title compound was synthesized according to the general procedure C stated above. **1h** (354.33 mg, 1.00 mmol), NaOCl\* 5H<sub>2</sub>O (987.12 mg, 6.00 mmol), NaHSO<sub>4</sub> (12.01 mg, 0.10 mmol), **5** (266.60 mg, 2.2 mmol), MgO (161.20 mg, 4.00 mmol) were used, to afford **5h** as a white solid (625.75 mg, 1.90 mmol, 95%).

<sup>1</sup>H NMR (600 MHz, CDCl<sub>3</sub>) δ 7.91 – 7.89 (m, 2H), 7.74 – 7.73 (d, *J* = 8.3 Hz, 2H), 7.27 – 7.21 (m, 2H), 7.08 – 7.06 (m, 3H), 4.70 – 4.69 (t, *J* = 5.9 Hz, 1H), 3.29 – 3.25 (q, *J* = 6.5 Hz, 2H), 2.79 – 2.78 (t, *J* = 6.9 Hz, 2H).

<sup>13</sup>C NMR (151 MHz, CDCl<sub>3</sub>) δ 143.6, 137.3, 134.3 (q, *J*<sub>C-F</sub> = 30.2 Hz), 128.8 (d, *J*<sub>C-F</sub> = 15.1 Hz), 127.5, 126.4, 126.3, 126.2, 123.3 (q, *J*<sub>C-F</sub> = 135.9 Hz), 44.3, 35.8.

**M.P.:** 93-94 °C

The spectroscopic data closely match the ones previously reported in the literature.<sup>17</sup>

*N*-Phenylethyl-4-(methoxy)benzenesulphonamide (**5j**)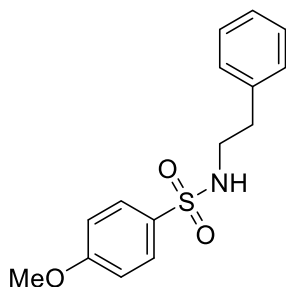

The title compound was synthesized according to the general procedure B stated above. **2j** (206.64 mg, 1.00 mmol), **5** (133.30 mg, 1.1 mmol) and MgO (161.20 mg, 4.00 mmol) were used, to afford **5j** as a white solid (262.23 mg, 0.90 mmol, 90%).

The title compound was synthesized according to the general procedure C stated above. **1j** (278.38 mg, 1.00 mmol), NaOCl\*5H<sub>2</sub>O (987.12 mg, 6.00 mmol), NaHSO<sub>4</sub> (12.01 mg, 0.10 mmol), **5** (266.60 mg, 2.2 mmol), MgO (161.20 mg, 4.00 mmol) were used, to afford **5j** as a white solid (524.47 mg, 1.80 mmol, 90%).

<sup>1</sup>H NMR (600 MHz, CDCl<sub>3</sub>) δ 7.76 – 7.73 (m, 2H), 7.26 – 7.25 (m, 2H), 7.24 – 7.18 (m, 1H), 7.08 – 7.07 (m, 2H), 6.94 – 6.93 (m, 2H), 4.79 – 4.77 (t, *J* = 6.2 Hz, 1H), 3.84 (s, 3H), 3.19 – 3.16 (t, *J* = 7.1 Hz, 2H), 2.76 – 2.74 (t, *J* = 7.1 Hz, 2H).

$^{13}\text{C}$  NMR (151 MHz,  $\text{CDCl}_3$ )  $\delta$  162.9, 137.9, 131.3, 129.2, 128.8, 128.7, 126.7, 114.3, 55.7, 44.3, 35.8.

**M.P.:** 52-53 °C

The spectroscopic data closely match the ones previously reported in the literature.<sup>18</sup>

*N*-(Phenyl)benzenesulfonamide (**6a**)

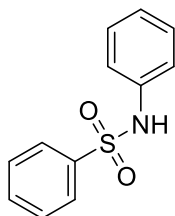

The title compound was synthesized according to the general procedure B stated above. **2a** (176.61 mg, 1.00 mmol), **6** (102.44 mg, 1.1 mmol) and MgO (161.20 mg, 4.00 mmol) were used, to afford **6a** as a white solid (198.30 mg, 0.86 mmol, 86%).

The title compound was synthesized according to the general procedure C stated above. **1a** (218.33 mg, 1.00 mmol), NaOCl\*5H<sub>2</sub>O (987.12 mg, 6.00 mmol), NaHSO<sub>4</sub> (12.01 mg, 0.10 mmol), **6** (204.89 mg, 2.2 mmol), MgO (161.20 mg, 4.00 mmol) were used, to afford **6a** as a white solid (396.59 mg, 1.72 mmol, 86%).

$^1\text{H}$  NMR (600 MHz,  $\text{CDCl}_3$ )  $\delta$  7.74 – 7.72 (m, 2H), 7.44 – 7.43 (m, 2H), 7.42 – 7.40 (m, 2H), 7.33 – 7.30 (m, 2H), 7.14 – 7.10 (m, 2H), 7.03 – 6.98 (m, 1H).

$^{13}\text{C}$  NMR (151 MHz,  $\text{CDCl}_3$ )  $\delta$  139.0, 136.6, 133.1, 129.3, 129.1, 127.3, 125.4, 121.7.

**M.P.:** 110 °C

The spectroscopic data closely match the ones previously reported in the literature.<sup>19</sup>

*N*-Phenyl-4-(methyl)benzenesulfonamide (**6b**)

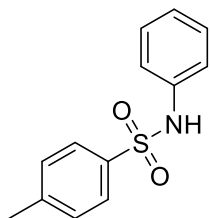

The title compound was synthesized according to the general procedure B stated above. **2b** (190.64 mg, 1.00 mmol), **6** (102.44 mg, 1.1 mmol) and MgO (161.20 mg, 4.00 mmol) were used, to afford **6b** as a white solid (205.27 mg, 0.83 mmol, 83%).

The title compound was synthesized according to the general procedure C stated above. **1b** (246.39 mg, 1.00 mmol), NaOCl\*5H<sub>2</sub>O (987.12 mg, 6.00 mmol), NaHSO<sub>4</sub> (12.01 mg, 0.10 mmol), **6** (204.89 mg, 2.2 mmol), MgO (161.20 mg, 4.00 mmol) were used, to afford **6b** as a white solid (410.54 mg, 1.66 mmol, 83%).

$^1\text{H}$  NMR (600 MHz,  $\text{CDCl}_3$ )  $\delta$  7.71 – 7.70 (d,  $J$  = 7.9 Hz, 2H), 7.55 (t,  $J$  = 8.1 Hz, 1H), 7.22 – 7.19 (d,  $J$  = 7.9 Hz, 4H), 7.12 – 7.06 (m, 3H), 2.35 (s, 3H).

$^{13}\text{C}$  NMR (151 MHz,  $\text{CDCl}_3$ )  $\delta$  143.9, 136.8, 136.1, 129.7, 129.3, 127.4, 125.2, 121.4, 21.6.

**M.P.:** 103 °C

The spectroscopic data closely match the ones previously reported in the literature.<sup>20</sup>

*N*-Phenyl-4-(*tert*-butyl)benzenesulfonamide (**6c**)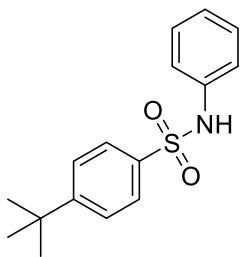

The title compound was synthesized according to the general procedure B stated above. **2c** (190.64 mg, 1.00 mmol), **6** (102.44 mg, 1.1 mmol) and MgO (161.20 mg, 4.00 mmol) were used, to afford **6c** as a white solid (231.51 mg, 0.80 mmol, 80%).

The title compound was synthesized according to the general procedure C stated above. **1c** (246.39 mg, 1.00 mmol), NaOCl\*5H<sub>2</sub>O (987.12 mg, 6.00 mmol), NaHSO<sub>4</sub> (12.01 mg, 0.10 mmol), **6** (204.89 mg, 2.2 mmol), MgO (161.20 mg, 4.00 mmol) were used, to afford **6c** as a white solid (460.02 mg, 1.60 mmol, 80%).

<sup>1</sup>H NMR (600 MHz, CDCl<sub>3</sub>) δ 7.77 – 7.76 (m, 2H), 7.47 – 7.42 (m, 3H), 7.24 – 7.21 (m, 2H), 7.14 – 7.07 (m, 2H), 1.29 (s, 9H).

<sup>13</sup>C NMR (151 MHz, CDCl<sub>3</sub>) δ 156.9, 136.9, 136.2, 129.4, 127.2, 126.2, 125.1, 121.3, 35.2, 31.1.

**M.P.:** 118-119 °C

The spectroscopic data closely match the ones previously reported in the literature.<sup>21</sup>

*N*-Phenyl-4-(nitro)benzenesulfonamide (**6d**)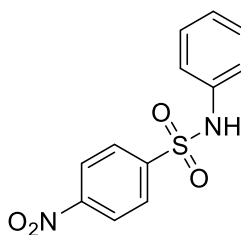

The title compound was synthesized according to the general procedure B stated above. **2d** (221.61 mg, 1.00 mmol), **6** (102.44 mg, 1.1 mmol) and MgO (161.20 mg, 4.00 mmol) were used, to afford **6d** as a brown solid (256.02 mg, 0.92 mmol, 92%).

The title compound was synthesized according to the general procedure C stated above. **1d** (308.33 mg, 1.00 mmol), NaOCl\*5H<sub>2</sub>O (987.12 mg, 6.00 mmol), NaHSO<sub>4</sub> (12.01 mg, 0.10 mmol), **6** (204.89 mg, 2.2 mmol), MgO (161.20 mg, 4.00 mmol) were used, to afford **6d** as a brown solid (512.04 mg, 1.84 mmol, 92%).

<sup>1</sup>H NMR (600 MHz, CDCl<sub>3</sub>) δ 8.29 – 8.26 (m, 2H), 7.94 – 7.92 (m, 2H), 7.29 – 7.26 (m, 2H), 7.20 – 7.18 (m, 1H), 7.09 – 7.07 (m, 2H), 6.80 (s, 1H).

<sup>13</sup>C NMR (151 MHz, CDCl<sub>3</sub>) δ 150.4, 144.8, 135.4, 129.8, 128.7, 126.7, 124.4, 122.6.

**M.P.:** 135-136 °C

The spectroscopic data closely match the ones previously reported in the literature.<sup>22</sup>

*N*-Phenyl 4-(fluoro)benzenesulfonamide (**6g**)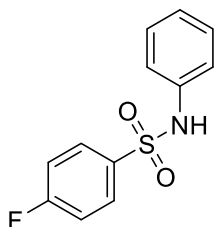

The title compound was synthesized according to the general procedure B stated above. **2g** (194.60 mg, 1.00 mmol), **6** (102.44 mg, 1.1 mmol) and MgO (161.20 mg, 4.00 mmol) were used, to afford **6g** as a white solid (226.15 mg, 0.90 mmol, 90%).

The title compound was synthesized according to the general procedure C stated above. **1c** (254.31 mg, 1.00 mmol), NaOCl\*5H<sub>2</sub>O (987.12 mg, 6.00 mmol), NaHSO<sub>4</sub> (12.01 mg, 0.10 mmol), **6** (204.89 mg, 2.2 mmol), MgO (161.20 mg, 4.00 mmol) were used, to afford **6g** as a white solid (452.30 mg, 1.80 mmol, 90%).

<sup>1</sup>H NMR (600 MHz, CDCl<sub>3</sub>) δ 7.81 – 7.78 (m, 2H), 7.26 – 7.23 (m, 2H), 7.14 – 7.07 (m, 5H), 7.03 (s, 1H)

<sup>13</sup>C NMR (151 MHz, CDCl<sub>3</sub>) δ 165.1 (d, *J*<sub>C-F</sub> = 252.5 Hz), 136.3, 135.0 (d, *J*<sub>C-F</sub> = 328.9 Hz), 130.3, 129.9, 125.6, 121.8, 116.2 (d, *J*<sub>C-F</sub> = 22.9 Hz).

**M.P.:** 109-111 °C



The spectroscopic data closely match the ones previously reported in the literature.<sup>23</sup>

*N*-Phenyl-4-(chloro)benzenesulfonamide (**6h**)

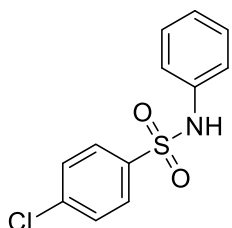

The title compound was synthesized according to the general procedure B stated above. **2h** (211.06 mg, 1.00 mmol), **6** (102.44 mg, 1.1 mmol) and MgO (161.20 mg, 4.00 mmol) were used, to afford **6h** as a white solid (232.93 mg, 0.87 mmol, 87%).

The title compound was synthesized according to the general procedure C stated above. **1h** (287.22 mg, 1.00 mmol), NaOCl\*5H<sub>2</sub>O (987.12 mg, 6.00 mmol), NaHSO<sub>4</sub> (12.01 mg, 0.10 mmol), **6** (204.89 mg, 2.2 mmol), MgO (161.20 mg, 4.00 mmol) were used, to afford **6h** as a white solid (465.85 mg, 1.74 mmol, 87%).

<sup>1</sup>H NMR (600 MHz, CDCl<sub>3</sub>) δ 7.72 – 7.71 (m, 2H), 7.40 – 7.38 (m, 2H), 7.26 – 7.23 (m, 2H), 7.14 (m, 1H), 7.13 – 7.08 (m, 2H).

<sup>13</sup>C NMR (151 MHz, CDCl<sub>3</sub>) δ 139.7, 137.5, 136.2, 129.6, 129.5, 128.8, 125.9, 122.0.

**M.P.:** 103-105 °C

The spectroscopic data closely match the ones previously reported in the literature.<sup>23</sup>

*N*-Phenyl-4-(trifluoromethyl)benzenesulfonamide (**6i**)

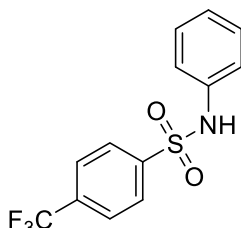

The title compound was synthesized according to the general procedure B stated above. **2i** (211.06 mg, 1.00 mmol), **6** (102.44 mg, 1.1 mmol) and MgO (161.20 mg, 4.00 mmol) were used, to afford **6i** as a white solid (268.14 mg, 0.89 mmol, 89%).

The title compound was synthesized according to the general procedure C stated above. **1i** (287.22 mg, 1.00 mmol), NaOCl\*5H<sub>2</sub>O (987.12 mg, 6.00 mmol), NaHSO<sub>4</sub> (12.01 mg, 0.10 mmol), **6** (204.89 mg, 2.2 mmol), MgO (161.20 mg, 4.00 mmol) were used, to afford **6i** as a white solid (536.28 mg, 1.78 mmol, 89%).

<sup>1</sup>H NMR (600 MHz, CDCl<sub>3</sub>) δ 7.90 – 7.89 (d, *J* = 8.2 Hz, 2H), 7.71 – 7.70 (d, *J* = 8.2 Hz, 2H), 7.29 – 7.25 (m, 2H), 7.18 – 7.15 (m, 1H), 7.10 – 7.07 (m, 2H), 6.95 (s, 1H).

<sup>13</sup>C NMR (151 MHz, CDCl<sub>3</sub>) δ 142.7, 135.8, 133.5 (q, *J*<sub>C-F</sub> = 32.9 Hz), 127.8, 126.3 (q, *J*<sub>C-F</sub> = 3.8 Hz), 124.2, 122.4, 122.3 (d, *J*<sub>C-F</sub> = 272.1 Hz), 121.5.

**M.P.:** 121-123 °C

The spectroscopic data closely match the ones previously reported in the literature.<sup>23</sup>

*N*-Phenyl-4-(methoxy)benzenesulfonamide (**6j**)

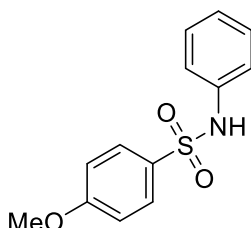

The title compound was synthesized according to the general procedure B stated above. **2j** (206.64 mg, 1.00 mmol), **6** (102.44 mg, 1.1 mmol) and MgO (161.20 mg, 4.00 mmol) were used, to afford **6j** as a white solid (208.02 mg, 0.79 mmol, 79%).

The title compound was synthesized according to the general procedure C stated above. **1j** (278.38 mg, 1.00 mmol), NaOCl\*5H<sub>2</sub>O (987.12 mg, 6.00 mmol), NaHSO<sub>4</sub> (12.01 mg, 0.10 mmol), **6** (204.89 mg, 2.2 mmol), MgO (161.20 mg, 4.00 mmol) were used, to afford **6j** as a white solid (416.03 mg, 1.58 mmol, 79%).

$^1\text{H NMR}$  (600 MHz,  $\text{CDCl}_3$ )  $\delta$  7.73 – 7.71 (m, 2H), 7.26 – 7.21 (m, 2H), 7.11 – 7.07 (m, 3H), 6.94 – 6.93 (m, 1H), 6.89 – 6.87 (m, 2H), 3.82 (s, 3H).

$^{13}\text{C NMR}$  (151 MHz,  $\text{CDCl}_3$ )  $\delta$  163.1, 136.8, 130.5, 129.5, 129.3, 125.1, 121.4, 114.2, 55.6.

**M.P.:** 108-109 °C

The spectroscopic data closely match the ones previously reported in the literature.<sup>23</sup>

#### *N*-phenyl-methanesulfonamide (**6k**)

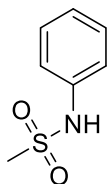

The title compound was synthesized according to the general procedure B stated above. **2k** (114.54 mg, 1.00 mmol), **6** (102.44 mg, 1.1 mmol) and MgO (161.20 mg, 4.00 mmol) were used, to afford **6k** as a white solid (107.86 mg, 0.63 mmol, 63%).

The title compound was synthesized according to the general procedure C stated above. **1k** (94.19 mg, 1.00 mmol), NaOCl  $5\text{H}_2\text{O}$  (987.12 mg, 6.00 mmol),  $\text{NaHSO}_4$  (12.01 mg, 0.10 mmol), **6** (204.89 mg, 2.2 mmol), MgO (161.20 mg, 4.00 mmol) were used, to afford **6k** as a white solid (215.73 mg, 1.26 mmol, 63%).

$^1\text{H NMR}$  (600 MHz,  $\text{CDCl}_3$ )  $\delta$  7.37 – 7.36 (m, 2H), 7.35 – 7.34 (m, 2H), 7.33 (s, 1H), 3.02 (s, 3H).

$^{13}\text{C NMR}$  (151 MHz,  $\text{CDCl}_3$ )  $\delta$  136.9, 129.9, 125.6, 120.9, 39.4.

**M.P.:** 98-100 °C

The spectroscopic data closely match the ones previously reported in the literature.<sup>24</sup>

#### *N*-(4-Hydroxyphenyl)-benzenesulfonamide (**7a**)

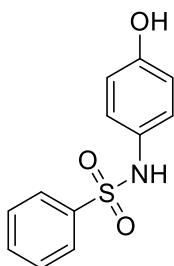

The title compound was synthesized according to the general procedure B stated above. **2a** (176.61 mg, 1.00 mmol), **7** (120.04 mg, 1.1 mmol) and MgO (161.20 mg, 4.00 mmol) were used, to afford **7a** as a brown solid (221.86 mg, 0.89 mmol, 89%).

The title compound was synthesized according to the general procedure C stated above. **1a** (218.33 mg, 1.00 mmol), NaOCl $\cdot$ 5 $\text{H}_2\text{O}$  (987.12 mg, 6.00 mmol),  $\text{NaHSO}_4$  (12.01 mg, 0.10 mmol), **7** (240.09 mg, 2.2 mmol), MgO (161.20 mg, 4.00 mmol) were used, to afford **7a** as a brown solid (443.72 mg, 1.78 mmol, 89%).

$^1\text{H NMR}$  (600 MHz, DMSO)  $\delta$  9.71 (s, 1H), 9.30 (s, 1H), 7.66 – 7.64 (m, 2H), 7.60 – 7.57 (m, 1H), 7.53 – 7.50 (m, 2H), 6.83 – 6.81 (m, 2H), 6.60 – 6.58 (m, 2H).

$^{13}\text{C NMR}$  (151 MHz, DMSO)  $\delta$  155.6, 139.9, 133.5, 129.8, 129.1, 127.5, 125.2, 116.4.

**M.P.:** 155-156 °C

The spectroscopic data closely match the ones previously reported in the literature.<sup>25</sup>

*N*-(4-Hydroxyphenyl)-4-(methyl)benzenesulfonamide (**7b**)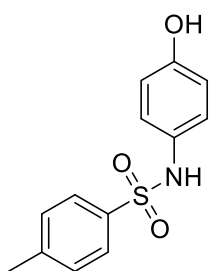

The title compound was synthesized according to the general procedure B stated above. **2b** (190.64 mg, 1.00 mmol), **7** (120.04 mg, 1.1 mmol) and MgO (161.20 mg, 4.00 mmol) were used, to afford **7b** as a brown solid (229.08 mg, 0.87 mmol, 87%).

The title compound was synthesized according to the general procedure C stated above. **1b** (218.33 mg, 1.00 mmol), NaOCl·5H<sub>2</sub>O (987.12 mg, 6.00 mmol), NaHSO<sub>4</sub> (12.01 mg, 0.10 mmol), **7** (240.09 mg, 2.2 mmol), MgO (161.20 mg, 4.00 mmol) were used, to afford **7b** as a brown solid (458.16 mg, 1.74 mmol, 87%).

<sup>1</sup>H NMR (600 MHz, DMSO) δ 9.65 (s, 1H), 7.56 – 7.54 (m, 2H), 7.30 – 7.28 (m, 2H), 6.87 – 6.85 (m, 2H), 6.63 – 6.60 (m, 2H), 2.30 (s, 3H).

<sup>13</sup>C NMR (151 MHz, DMSO) δ 154.9, 142.9, 136.8, 129.5, 128.7, 126.8, 124.0, 115.6, 21.0.

**M.P.:** 148-150 °C

The spectroscopic data closely match the ones previously reported in the literature.<sup>26</sup>

*N*-(4-Hydroxyphenyl)-4-(*tert*-butyl)benzenesulfonamide (**7c**)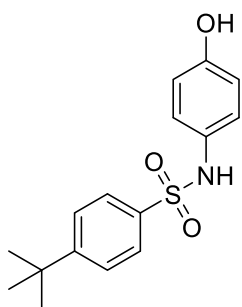

The title compound was synthesized according to the general procedure B stated above. **2c** (232.72 mg, 1.00 mmol), **7** (120.04 mg, 1.1 mmol), and MgO (161.20 mg, 4.00 mmol) were used to afford **7c** as a brown solid (253.47 mg, 0.83 mmol, 83%).

The title compound was synthesized according to the general procedure C stated above. **1c** (330.55 mg, 1.00 mmol), NaOCl·5H<sub>2</sub>O (987.12 mg, 6.00 mmol), NaHSO<sub>4</sub> (12.01 mg, 0.10 mmol), **7** (240.09 mg, 2.2 mmol), MgO (161.20 mg, 4.00 mmol) were used, to afford **7c** as a brown solid (506.95 mg, 1.66 mmol, 83%).

<sup>1</sup>H NMR (600 MHz, DMSO) δ 9.72 (s, 1H), 7.62 – 7.60 (m, 2H), 7.54 – 7.52 (m, 2H), 6.88 – 6.87 (m, 2H), 6.62 – 6.60 (m, 2H), 1.25 (s, 9H).

<sup>13</sup>C NMR (151 MHz, DMSO) δ 172.0, 155.5, 154.7, 137.0, 128.7, 126.6, 126.2, 115.6, 34.8, 30.8.

**M.P.:** 159-161 °C

The spectroscopic data closely match the ones previously reported in the literature.<sup>26</sup>

*N*-(4-Hydroxyphenyl)-4-(nitro)benzenesulfonamide (**7d**)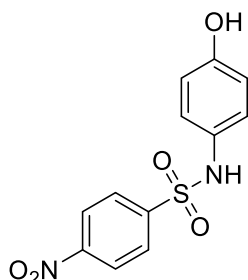

The title compound was synthesized according to the general procedure B stated above. **2d** (221.61 mg, 1.00 mmol), **7** (120.04 mg, 1.1 mmol) and MgO (161.20 mg, 4.00 mmol) were used, to afford **7d** as a brown solid (276.62 mg, 0.94 mmol, 94%).

The title compound was synthesized according to the general procedure C stated above. **1d** (308.33 mg, 1.00 mmol), NaOCl·5H<sub>2</sub>O (987.12 mg, 6.00 mmol), NaHSO<sub>4</sub> (12.01 mg, 0.10 mmol), **7** (240.09 mg, 2.2 mmol), MgO (161.20 mg, 4.00 mmol) were used, to afford **7d** as a brown solid (553.25 mg, 1.88 mmol, 94%).

<sup>1</sup>H NMR (600 MHz, DMSO) δ 10.04 (s, 1H), 9.38 (s, 1H), 8.36 – 8.34 (m, 2H), 7.89 – 7.87 (m, 2H), 6.84 – 6.82 (m, 2H), 6.63 – 6.60 (m, 2H).

<sup>13</sup>C NMR (151 MHz, DMSO) δ 155.6, 150.0, 145.2, 128.6, 127.7, 125.1, 124.7, 116.0.

**M.P.:** 186 °C

The spectroscopic data closely match the ones previously reported in the literature.<sup>27</sup>

*N*-(4-Hydroxyphenyl)-4-(fluoro)benzenesulfonamide (**7g**)

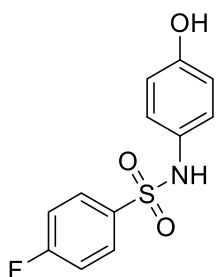

The title compound was synthesized according to the general procedure B stated above. **2g** (194.60 mg, 1.00 mmol), **7** (120.04 mg, 1.1 mmol) and MgO (161.20 mg, 4.00 mmol) were used, to afford **7g** as a brown solid (245.89 mg, 0.92 mmol, 92%).

The title compound was synthesized according to the general procedure C stated above. **1g** (254.31 mg, 1.00 mmol), NaOCl\*5H<sub>2</sub>O (987.12 mg, 6.00 mmol), NaHSO<sub>4</sub> (12.01 mg, 0.10 mmol), **7** (240.09 mg, 2.2 mmol), MgO (161.20 mg, 4.00 mmol) were used, to afford **7g** as a brown solid (491.78 mg, 1.84 mmol, 92%).

<sup>1</sup>H NMR (600 MHz, DMSO) δ 9.72 (s, 1H), 9.33 (s, 1H), 7.70 – 7.68 (m, 2H), 7.38 – 7.35 (m, 2H), 6.83 – 6.81 (m, 2H), 6.62 – 6.59 (m, 2H).

<sup>13</sup>C NMR (151 MHz, DMSO) δ 164.0 (d, *J*<sub>C-F</sub> = 135.9 Hz), 155.1, 135.9, 130.2 (d, *J*<sub>C-F</sub> = 30.2 Hz), 128.7, 124.4, 116.7 (d, *J*<sub>C-F</sub> = 15.1 Hz), 116.0.

**M.P.:** 171-172 °C

The spectroscopic data closely match the ones previously reported in the literature.<sup>28</sup>

*N*-(4-Hydroxyphenyl)-4-(chloro)benzenesulfonamide (**7h**)

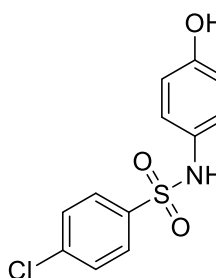

The title compound was synthesized according to the general procedure B stated above. **2h** (211.06 mg, 1.00 mmol), **7** (120.04 mg, 1.1 mmol) and MgO (161.20 mg, 4.00 mmol) were used, to afford **7h** as a brown solid (258.19 mg, 0.91 mmol, 91%).

The title compound was synthesized according to the general procedure C stated above. **1h** (287.22 mg, 1.00 mmol), NaOCl\*5H<sub>2</sub>O (987.12 mg, 6.00 mmol), NaHSO<sub>4</sub> (12.01 mg, 0.10 mmol), **7** (240.09 mg, 2.2 mmol), MgO (161.20 mg, 4.00 mmol) were used, to afford **7h** as a brown solid (516.39 mg, 1.82 mmol, 91%).

<sup>1</sup>H NMR (600 MHz, DMSO) δ 10.50 (s, 1H), 7.79 – 7.71 (m, 2H), 7.70 – 7.63 (m, 2H), 7.05 – 7.04 (m, 2H), 6.95 – 6.93 (m, 2H).

<sup>13</sup>C NMR (151 MHz, CDCl<sub>3</sub>) δ 135.1, 133.6, 129.9, 129.6, 129.5, 128.7, 123.4, 122.9.

**M.P.:** 178 °C

The spectroscopic data closely match the ones previously reported in the literature.<sup>29</sup>

*N*-(4-Hydroxyphenyl)-4-(trifluoromethyl)benzenesulfonamide (**7i**)

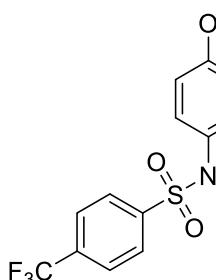

The title compound was synthesized according to the general procedure B stated above. **2i** (244.61 mg, 1.00 mmol), **7** (120.04 mg, 1.1 mmol) and MgO (161.20 mg, 4.00 mmol) were used, to afford **7i** as a brown solid (298.24 mg, 0.94 mmol, 94%).

The title compound was synthesized according to the general procedure C stated above. **1i** (354.33 mg, 1.00 mmol), NaOCl\*5H<sub>2</sub>O (987.12 mg, 6.00 mmol), NaHSO<sub>4</sub> (12.01 mg, 0.10 mmol), **7** (240.09 mg, 2.2 mmol), MgO (161.20 mg, 4.00 mmol) were used, to afford **7i** as a brown solid (596.49 mg, 1.88 mmol, 94%).

**<sup>1</sup>H NMR** (600 MHz, DMSO)  $\delta$  9.96 (s, 1H), 9.38 (s, 1H), 7.93 – 7.92 (d,  $J$  = 8.3 Hz, 2H), 7.86 – 7.84 (d,  $J$  = 8.3 Hz, 2H), 6.85 – 6.83 (m, 2H), 6.63 – 6.61 (m, 2H).

**<sup>13</sup>C NMR** (151 MHz, DMSO)  $\delta$  155.3, 143.4, (q,  $J_{C-F}$  = 30.2 Hz), 132.0, 127.8, 127.7, 126.4, 126.3, 124.4 (q,  $J_{C-F}$  = 135.9 Hz), 115.7.

**M.P.:** 181-182 °C

*N*-(4-Hydroxyphenyl)-4-(methoxy)benzenesulfonamide (**7j**)

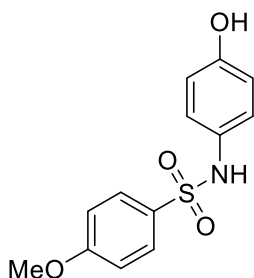

The title compound was synthesized according to the general procedure B stated above. **2j** (206.64 mg, 1.00 mmol), **7** (120.04 mg, 1.1 mmol) and MgO (161.20 mg, 4.00 mmol) were used, to afford **7j** as a brown solid (223.45 mg, 0.80 mmol, 80%).

The title compound was synthesized according to the general procedure C stated above. **1j** (278.38 mg, 1.00 mmol), NaOCl\*5H<sub>2</sub>O (987.12 mg, 6.00 mmol), NaHSO<sub>4</sub> (12.01 mg, 0.10 mmol), **7** (240.09 mg, 2.2 mmol), MgO (161.20 mg, 4.00 mmol) were used, to afford **7j** as a brown solid (446.90 mg, 1.60 mmol, 80%).

**<sup>1</sup>H NMR** (600 MHz, DMSO):  $\delta$  9.56 (s, 1H), 7.58 – 7.57 (m, 2H), 7.03 – 7.02 (m, 2H), 6.84 – 6.82 (m, 2H), 6.60 – 6.59 (m, 2H), 3.79 (s, 3H).

**<sup>13</sup>C NMR** (151 MHz, DMSO):  $\delta$  172.0, 162.2, 154.7, 131.2, 128.7, 123.9, 115.5, 114.1, 55.6.

**M.P.:** 185 °C

The spectroscopic data closely match the ones previously reported in the literature.<sup>28</sup>

*N*-phenylsulfonylpiperidine (**8a**)

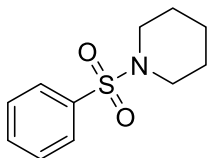

The title compound was synthesized according to the general procedure B stated above. **2a** (176.61 mg, 1.00 mmol), **8** (93.67 mg, 1.1 mmol) and MgO (161.20 mg, 4.00 mmol) were used, to afford **8a** as a white solid (220.80 mg, 0.98 mmol, 98%).

The title compound was synthesized according to the general procedure C stated above. **1a** (218.33 mg, 1.00 mmol), NaOCl\*5H<sub>2</sub>O (987.12 mg, 6.00 mmol), NaHSO<sub>4</sub> (12.01 mg, 0.10 mmol), **8** (187.34 mg, 2.2 mmol), MgO (161.20 mg, 4.00 mmol) were used, to afford **7a** as a white solid (441.61 mg, 1.96 mmol, 98%).

**<sup>1</sup>H NMR** (600 MHz, CDCl<sub>3</sub>)  $\delta$  7.76 – 7.74 (m, 2H), 7.60 – 7.57 (t,  $J$  = 7.4 Hz, 1H), 7.53 – 7.51 (t,  $J$  = 7.5 Hz, 2H), 2.99 – 2.97 (t,  $J$  = 5.7 Hz, 4H), 1.65 – 1.61 (p,  $J$  = 5.7 Hz, 4H), 1.43 – 1.39 (m, 2H).

**<sup>13</sup>C NMR** (151 MHz, CDCl<sub>3</sub>)  $\delta$  136.5, 132.7, 129.0, 127.8, 47.1, 25.3, 23.6.

**M.P.:** 95-97 °C

The spectroscopic data closely match the ones previously reported in the literature.<sup>27</sup>

*N*-(4-(Methyl)phenylsulfonyl) piperidine (**8b**)

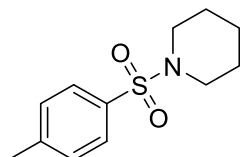

The title compound was synthesized according to the general procedure B stated above. **2b** (190.64 mg, 1.00 mmol), **8** (93.67 mg, 1.1 mmol) and MgO (161.20 mg, 4.00 mmol) were used, to afford **8b** as a white solid (229.76 mg, 0.96 mmol, 96%).

The title compound was synthesized according to the general procedure C stated above. **1b** (246.39 mg, 1.00 mmol), NaOCl\*5H<sub>2</sub>O (987.12 mg, 6.00 mmol), NaHSO<sub>4</sub> (12.01 mg, 0.10 mmol), **8** (187.34 mg, 2.2 mmol), MgO (161.20 mg, 4.00 mmol) were used, to afford **8b** as a white solid (469.51 mg, 1.96 mmol, 96%).

<sup>1</sup>H NMR (600 MHz, CDCl<sub>3</sub>) δ 7.64 – 7.63 (m, 2H), 7.32 – 7.31 (m, 2H), 2.98 – 2.96 (m, 4H), 2.43 (s, 3H), 1.65 – 1.62 (m, 4H), 1.42 – 1.40 (qd, *J* = 7.1, 4.7 Hz, 2H).

<sup>13</sup>C NMR (151 MHz, CDCl<sub>3</sub>) δ 143.4, 133.5, 129.7, 127.9, 47.1, 25.3, 23.7, 21.7.

**M.P.:** 97-99 °C

The spectroscopic data closely match the ones previously reported in the literature.<sup>6,20</sup>

#### *N*-(4-(*tert*-Butyl)phenylsulfonyl) piperidine (**8c**)

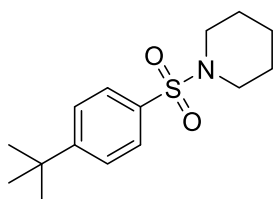

The title compound was synthesized according to the general procedure B stated above. **2c** (232.72 mg, 1.00 mmol), **8** (93.67 mg, 1.1 mmol) and MgO (161.20 mg, 4.00 mmol) were used, to afford **8c** as a white solid (261.71 mg, 0.93 mmol, 93%).

The title compound was synthesized according to the general procedure C stated above. **1c** (330.55 mg, 1.00 mmol), NaOCl\*5H<sub>2</sub>O (987.12 mg, 6.00 mmol), NaHSO<sub>4</sub> (12.01 mg, 0.10 mmol), **8** (187.34 mg, 2.2 mmol), MgO (161.20 mg, 4.00 mmol) were used, to afford **8c** as a white solid (523.43 mg, 1.86 mmol, 93%).

<sup>1</sup>H NMR (600 MHz, CDCl<sub>3</sub>) δ 7.68 – 7.66 (m, 2H), 7.52 – 7.51 (m, 2H), 3.00 – 2.98 (m, 4H), 1.66 – 1.63 (m, 4H), 1.44 – 1.40 (m, 2H), 1.34 (s, 9H).

<sup>13</sup>C NMR (151 MHz, CDCl<sub>3</sub>) δ 156.3, 133.5, 127.7, 126.0, 47.1, 35.3, 31.3, 25.4, 23.7.

**M.P.:** 129 – 130 °C

The spectroscopic data closely match the ones previously reported in the literature.<sup>30</sup>

#### *N*-(4-(Nitro)phenylsulfonyl) piperidine (**8d**)

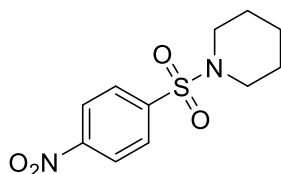

The title compound was synthesized according to the general procedure B stated above. **2d** (232.72 mg, 1.00 mmol), **8** (93.67 mg, 1.1 mmol) and MgO (161.20 mg, 4.00 mmol) were used, to afford **8d** as a pale-yellow solid. (261.71 mg, 0.99 mmol, 99%).

The title compound was synthesized according to the general procedure C stated above. **1d** (330.55 mg, 1.00 mmol), NaOCl\*5H<sub>2</sub>O (987.12 mg, 6.00 mmol), NaHSO<sub>4</sub> (12.01 mg, 0.10 mmol), **8** (187.34 mg, 2.2 mmol), MgO (161.20 mg, 4.00 mmol) were used, to afford **8d** as a pale-yellow solid (523.43 mg, 1.98 mmol, 99%).

<sup>1</sup>H NMR (600 MHz, CDCl<sub>3</sub>) δ 8.38 – 8.37 (m, 2H), 7.95 – 7.93 (m, 2H), 3.07 – 3.05 (m, 4H), 1.68 – 1.64 (m, 4H), 1.48 – 1.44 (m, 2H).

<sup>13</sup>C NMR (151 MHz, CDCl<sub>3</sub>) δ 162.0, 142.9, 128.9, 124.4, 47.1, 25.3, 23.5.

**M.P.:** 168-170 °C

The spectroscopic data closely match the ones previously reported in the literature.<sup>27,30</sup>

*N*-(4-(Fluoro)phenylsulfonyl) piperidine (**8g**)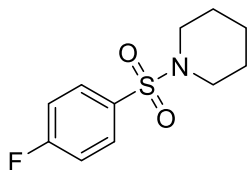

The title compound was synthesized according to the general procedure B stated above. **2g** (194.60 mg, 1.00 mmol), **8** (93.67 mg, 1.1 mmol) and MgO (161.20 mg, 4.00 mmol) were used, to afford **8g** as a white solid. (218.97 mg, 0.90 mmol, 90%).

The title compound was synthesized according to the general procedure C stated above.

**1g** (254.31 mg, 1.00 mmol), NaOCl\*5H<sub>2</sub>O (987.12 mg, 6.00 mmol), NaHSO<sub>4</sub> (12.01 mg, 0.10 mmol), **8** (187.34 mg, 2.2 mmol), MgO (161.20 mg, 4.00 mmol) were used, to afford **8g** as a white solid (437.94 mg, 1.80 mmol, 90%).

<sup>1</sup>H NMR (600 MHz, CDCl<sub>3</sub>) δ 7.78 – 7.76 (m, 2H), 7.22 – 7.19 (m, 2H), 3.00 – 2.98 (m, 4H), 1.67 – 1.63 (p, *J* = 5.8 Hz, 4H), 1.45 – 1.41 (m, 2H).

<sup>13</sup>C NMR (151 MHz, CDCl<sub>3</sub>) δ 165.3 (d, *J*<sub>C-F</sub> = 135.9 Hz), 130.5, 130.4, 116.2 (d, *J*<sub>C-F</sub> = 15.1 Hz), 47.1, 25.3, 23.6.

**M.P.:** 76–77 °C

The spectroscopic data closely match the ones previously reported in the literature.<sup>31</sup>

*N*-(4-(Chloro)phenylsulfonyl) piperidine (**8h**)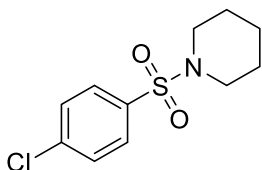

The title compound was synthesized according to the general procedure B stated above. **2h** (211.06 mg, 1.00 mmol), **8** (93.67 mg, 1.1 mmol) and MgO (161.20 mg, 4.00 mmol) were used, to afford **8h** as a white solid. (225.37 mg, 0.87 mmol, 87%).

The title compound was synthesized according to the general procedure C stated above. **1h** (287.22 mg, 1.00 mmol), NaOCl\*5H<sub>2</sub>O (987.12 mg, 6.00 mmol), NaHSO<sub>4</sub>

(12.01 mg, 0.10 mmol), **8** (187.34 mg, 2.2 mmol), MgO (161.20 mg, 4.00 mmol) were used, to afford **8h** as a white solid (450.73 mg, 1.74 mmol, 87%).

<sup>1</sup>H NMR (600 MHz, CDCl<sub>3</sub>) δ 7.71 – 7.68 (m, 2H), 7.51 – 7.49 (m, 2H), 3.00 – 2.98 (t, *J* = 5.5 Hz, 4H), 1.67 – 1.63 (q, *J* = 5.5 Hz, 4H), 1.46 – 1.42 (m, 2H).

<sup>13</sup>C NMR (151 MHz, CDCl<sub>3</sub>) δ 139.1, 135.0, 129.3, 129.1, 46.9, 25.2, 23.5.

**M.P.:** 92-93 °C

The spectroscopic data closely match the ones previously reported in the literature.<sup>31</sup>

*N*-(4-(Trifluoromethyl)phenylsulfonyl) piperidine (**8i**)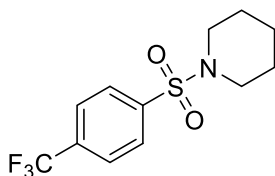

The title compound was synthesized according to the general procedure B stated above. **2i** (244.61 mg, 1.00 mmol), **8** (93.67 mg, 1.1 mmol) and MgO (161.20 mg, 4.00 mmol) were used, to afford **8i** as a white solid. (269.84 mg, 0.92 mmol, 92%).

The title compound was synthesized according to the general procedure C stated above. **1i** (354.33 mg, 1.00 mmol), NaOCl\*5H<sub>2</sub>O (987.12 mg, 6.00 mmol), NaHSO<sub>4</sub>

(12.01 mg, 0.10 mmol), **8** (187.34 mg, 2.2 mmol), MgO (161.20 mg, 4.00 mmol) were used, to afford **8i** as a white solid (539.67 mg, 1.84 mmol, 92%).

<sup>1</sup>H NMR (600 MHz, CDCl<sub>3</sub>) δ 7.89 – 7.88 (d, *J* = 8.3 Hz, 2H), 7.81 – 7.79 (d, *J* = 8.3 Hz, 2H), 3.03 – 3.01 (t, *J* = 5.5 Hz, 4H), 1.68 – 1.64 (p, *J* = 5.8 Hz, 4H), 1.47 – 1.43 (m, 2H).

$^{13}\text{C}$  NMR (151 MHz,  $\text{CDCl}_3$ )  $\delta$  152.2, 140.3, 134.3 (q  $J_{\text{C-F}} = 32.9$  Hz), 126.2 (q  $J_{\text{C-F}} = 15.1$  Hz), 122.4, 46.9, 25.2, 23.4.

**M.P.:** 95–96 °C

The spectroscopic data closely match the ones previously reported in the literature.<sup>30</sup>

*N*-(4-(Methoxy)phenylsulfonyl) piperidine (**8j**)

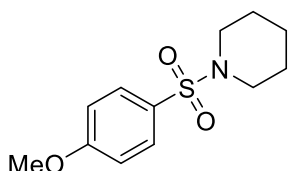

The title compound was synthesized according to the general procedure B stated above. **2j** (206.64 mg, 1.00 mmol), **8** (93.67 mg, 1.1 mmol) and MgO (161.20 mg, 4.00 mmol) were used, to afford **8j** as a white solid. (217.03 mg, 0.85 mmol, 85%).

The title compound was synthesized according to the general procedure C stated above. **1j** (278.38 mg, 1.00 mmol), NaOCl\*5H<sub>2</sub>O (987.12 mg, 6.00 mmol), NaHSO<sub>4</sub> (12.01 mg, 0.10 mmol), **8** (187.34 mg, 2.2 mmol), MgO (161.20 mg, 4.00 mmol) were used, to afford **8j** as a white solid (434.06 mg, 1.7 mmol, 85%).

$^1\text{H}$  NMR (600 MHz,  $\text{CDCl}_3$ )  $\delta$  7.64 – 7.62 (m, 2H), 6.95 – 6.94 (m, 2H), 3.82 (s, 3H), 2.91 – 2.89 (m, 4H), 1.60 – 1.56 (m, 4H), 1.37 – 1.34 (m, 2H).

$^{13}\text{C}$  NMR (151 MHz,  $\text{CDCl}_3$ )  $\delta$  162.9, 129.7, 127.8, 114.1, 55.6, 46.9, 25.1, 23.5.

**M.P.:** 105-108 °C

The spectroscopic data closely match the ones previously reported in the literature.<sup>10,31</sup>

*N*-(5-Methylisoxazol-3-yl)-4-(nitro)benzenesulfonamide (**9d**)

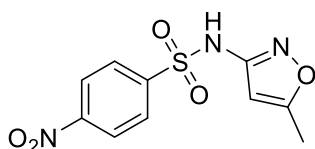

The title compound was synthesized according to the general procedure B stated above. **2d** (221.61 mg, 1.00 mmol), **9** (107.86 mg, 1.10 mmol) and MgO (161.20 mg, 4.00 mmol) were used, to afford **9d** as an orange solid. (212.45 mg, 0.75 mmol, 75%).

The title compound was synthesized according to the general procedure C stated above. **1d** (308.33 mg, 1.00 mmol), NaOCl\*5H<sub>2</sub>O (987.12 mg, 6.00 mmol), NaHSO<sub>4</sub> (12.01 mg, 0.10 mmol), **9** (215.72 mg, 2.2 mmol), MgO (161.20 mg, 4.00 mmol) were used, to afford **9d** as an orange solid (424.89 mg, 1.50 mmol, 75%).

$^1\text{H}$  NMR (600 MHz, DMSO)  $\delta$  8.44 – 8.43 (m, 2H), 8.13 – 8.11 (m, 2H), 2.31 (s, 3H).

$^{13}\text{C}$  NMR (151 MHz, DMSO)  $\delta$  171.2, 157.5, 150.6, 145.1, 128.9, 125.3, 96.0, 12.5.

**M.P.:** 194-195 °C

The spectroscopic data closely match the ones previously reported in the literature.<sup>32</sup>

*N*-(3,4-dimethylisoxazol-5-yl)-4-(nitro)benzenesulfonamide (**10d**)

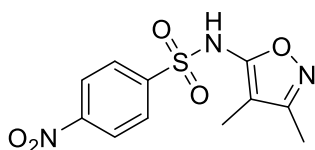

The title compound was synthesized according to the general procedure B stated above. **2d** (221.61 mg, 1.00 mmol), **10** (107.86 mg, 1.10 mmol) and MgO (161.20 mg, 4.00 mmol) were used, to afford **10d** as an orange solid. (196.21 mg, 0.66 mmol, 66%).



The title compound was synthesized according to the general procedure C stated above. **1d** (308.33 mg, 1.00 mmol), NaOCl\*5H<sub>2</sub>O (987.12 mg, 6.00 mmol), NaHSO<sub>4</sub> (12.01 mg, 0.10 mmol), **10** (215.72 mg, 2.2 mmol), MgO (161.20 mg, 4.00 mmol) were used, to afford **10d** as an orange solid (392.42 mg, 1.32 mmol, 66%).

<sup>1</sup>H NMR (600 MHz, CDCl<sub>3</sub>) δ 8.33 – 8.32 (d, *J* = 8.7 Hz, 2H), 8.02 – 8.01 (d, *J* = 8.7 Hz, 2H), 4.15 (s, 1H), 2.19 (s, 3H), 1.93 (s, 3H).

<sup>13</sup>C NMR (151 MHz, DMSO) δ 164.6, 162.3, 154.7, 150.5, 145.8, 128.7, 124.6, 11.0, 6.8.

**M.P.:** 205-207 °C

The spectroscopic data closely match the ones previously reported in the literature.<sup>33</sup>

#### *N*-Butyl-4-nitrobenzenesulfonamide (**11d**)

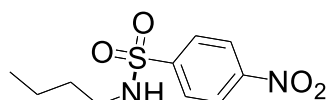

The title compound was synthesized according to the general procedure B stated above. **2d** (221.61 mg, 1.00 mmol), **11** (80.45 mg, 1.10 mmol) and MgO (161.20 mg, 4.00 mmol) were used, to afford **11d** as a white solid. (100.62 mg, 0.39 mmol, 39%).

The title compound was synthesized according to the general procedure C stated above. **1d** (308.33 mg, 1.00 mmol), NaOCl\*5H<sub>2</sub>O (987.12 mg, 6.00 mmol), NaHSO<sub>4</sub> (12.01 mg, 0.10 mmol), **11** (160.91 mg, 2.2 mmol), MgO (161.20 mg, 4.00 mmol) were used, to afford **11d** as a white solid (201.24 mg, 0.78 mmol, 39%).

<sup>1</sup>H NMR (600 MHz, CDCl<sub>3</sub>) δ 8.36 (d, *J* = 8.3 Hz, 2H), 8.05 (d, *J* = 8.3 Hz, 2H), 4.55 (bs, 1H), 3.03 (q, *J* = 6.9 Hz, 2H), 1.47 (t, *J* = 7.5 Hz, 2H), 1.31 (p, *J* = 7.5 Hz, 2H), 0.89 – 0.85 (m, 3H).

<sup>13</sup>C NMR (151 MHz, CDCl<sub>3</sub>) δ 150.2, 146.2, 128.4, 124.5, 43.3, 31.8, 19.8, 13.6.

**M.P.:** 75 °C

#### Methyl ((4-nitrophenyl)sulfonyl)phenylalaninate (**12d**)

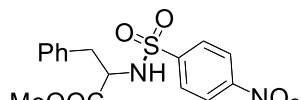

The title compound was synthesized according to the general procedure B stated above. **2d** (221.61 mg, 1.00 mmol), **12** (237.25 mg, 1.10 mmol) and MgO (161.20 mg, 4.00 mmol) were used, to afford **12d** as a white solid. (236.84 mg, 0.65 mmol, 65%).

The title compound was synthesized according to the general procedure C stated above. **1d** (308.33 mg, 1.00 mmol), NaOCl 5H<sub>2</sub>O (987.12 mg, 6.00 mmol), NaHSO<sub>4</sub> (12.01 mg, 0.10 mmol), **12** (474.50 mg, 2.2 mmol), MgO (161.20 mg, 4.00 mmol) were used, to afford **12d** as a white solid (473.68 mg, 1.30 mmol, 65%).

<sup>1</sup>H NMR (600 MHz, CDCl<sub>3</sub>) δ 8.28 – 8.22 (m, 2H), 7.90 – 7.84 (m, 2H), 7.35 – 7.31 (m, 1H), 7.26 (m, 2H), 7.10 (m, 2H), 5.59 (d, *J* = 9.3 Hz, 1H), 4.30 (q, *J* = 7.0 Hz, 1H), 3.66 (s, 3H), 3.19 – 2.98 (m, 2H).

<sup>13</sup>C NMR (151 MHz, CDCl<sub>3</sub>) δ 171.3, 150.1, 145.7, 128.9, 128.7, 128.3, 127.6, 125.2, 124.3, 57.3, 52.9, 39.3.

**M.P.:** 153-155°C

#### Methyl ((4-nitrophenyl)sulfonyl)tyrosinate (**13d**)

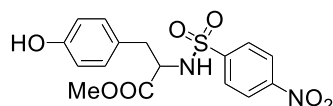

The title compound was synthesized according to the general procedure B stated above. **2d** (221.61 mg, 1.00 mmol), **13** (254.85 mg, 1.10 mmol) and MgO (161.20 mg, 4.00 mmol) were used, to afford **13d** as a white solid. (167.36 mg, 0.44 mmol, 44%).

The title compound was synthesized according to the general procedure C stated above. **1d** (308.33 mg, 1.00 mmol), NaOCl\*5H<sub>2</sub>O (987.12 mg, 6.00 mmol), NaHSO<sub>4</sub> (12.01 mg, 0.10 mmol), **13** (509.70 mg, 2.2 mmol), MgO (161.20 mg, 4.00 mmol) were used, to afford **13d** as a white solid (334.73 mg, 0.88 mmol, 44%).

<sup>1</sup>H NMR (600 MHz, CDCl<sub>3</sub>) δ 8.38 – 8.32 (m, 2H), 8.05 – 7.97 (m, 2H), 7.17 – 7.06 (m, 2H), 6.96 – 6.88 (m, 2H), 4.18 (bs, 1H), 3.74 (s, 3H), 3.15 – 2.99 (m, 2H), 2.96 – 2.79 (m, 2H).

<sup>13</sup>C NMR (151 MHz, CDCl<sub>3</sub>) δ 174.9, 155.6, 134.9, 131.1, 130.8, 130.1, 129.9, 128.3, 128.2, 56.9, 55.4, 38.6.

**M.P.:** 169 °C

*N*-(2-Hydroxyethyl)-4-nitrobenzenesulfonamide (**14d**)

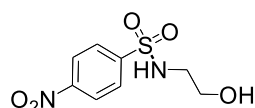

The title compound was synthesized according to the general procedure B stated above. **2d** (221.61 mg, 1.00 mmol), **14** (67.19 mg, 1.10 mmol) and MgO (161.20 mg, 4.00 mmol) were used, to afford **14d** as a white solid. (128.05 mg, 0.52 mmol, 52%).

The title compound was synthesized according to the general procedure C stated above. **1d** (308.33 mg, 1.00 mmol), NaOCl\*5H<sub>2</sub>O (987.12 mg, 6.00 mmol), NaHSO<sub>4</sub> (12.01 mg, 0.10 mmol), **14** (134.38 mg, 2.2 mmol), MgO (161.20 mg, 4.00 mmol) were used, to afford **14d** as a white solid (256.09 mg, 1.04 mmol, 52%).

<sup>1</sup>H NMR (600 MHz, CDCl<sub>3</sub>) δ 8.37 (d, *J* = 8.3 Hz, 2H), 8.07 (d, *J* = 8.3 Hz, 2H), 5.11 (bs, 1H), 3.74 (t, *J* = 5.2 Hz, 2H), 3.19 (q, *J* = 5.2 Hz, 2H).

<sup>13</sup>C NMR (151 MHz, CDCl<sub>3</sub>) δ 156.6, 146.0, 128.5, 124.6, 61.3, 45.3.

**M.P.:** 124 °C

*N*-(2-mercaptoethyl)-4-nitrobenzenesulfonamide (**15d**)

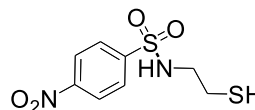

The title compound was synthesized according to the general procedure B stated above. **2d** (221.61 mg, 1.00 mmol), **15** (84.87 mg, 1.10 mmol) and MgO (161.20 mg, 4.00 mmol) were used, to afford **15d** as a white solid. (170.50 mg, 0.65 mmol, 65%).

The title compound was synthesized according to the general procedure C stated above. **1d** (308.33 mg, 1.00 mmol), NaOCl\*5H<sub>2</sub>O (987.12 mg, 6.00 mmol), NaHSO<sub>4</sub> (12.01 mg, 0.10 mmol), **15** (169.73 mg, 2.2 mmol), MgO (161.20 mg, 4.00 mmol) were used, to afford **15d** as a white solid (341.00 mg, 1.30 mmol, 65%).

<sup>1</sup>H NMR (600 MHz, CDCl<sub>3</sub>) δ 8.44 – 8.32 (m, 2H), 8.13 – 8.04 (m, 2H), 3.34 (m, 2H), 3.03 (m, 1H), 2.83 – 2.73 (m, 2H).

<sup>13</sup>C NMR (151 MHz, CDCl<sub>3</sub>) δ 150.4, 145.8, 128.5, 124.7, 41.9, 38.3.

**M.P.:** 131-133 °C

## 6. Green Metrics Calculations

### Calculation of Green Chemistry Metrics (*this mechanochemical method*)

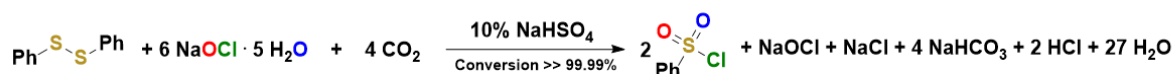

|                                     |                                     |                                    |                                    |                             |                                                                                                                                                     |
|-------------------------------------|-------------------------------------|------------------------------------|------------------------------------|-----------------------------|-----------------------------------------------------------------------------------------------------------------------------------------------------|
| M.W. 218.33 g/mol<br>Used 218.33 mg | M.W. 164.52 g/mol<br>Used 987.12 mg | M.W. 44.01 g/mol<br>Used 176.04 mg | M.W. 138.07 g/mol<br>Used 13.81 mg | M.W. 176.61<br>Prod. 349.69 | <b>Waste by-products</b><br>74.44 mg + 58.44 mg + 336.04 mg + 72.92 mg + 486.54 mg<br><b>Purification</b><br>5 mL AcOEt (d = 0.902 g/mL)<br>4510 mg |
|-------------------------------------|-------------------------------------|------------------------------------|------------------------------------|-----------------------------|-----------------------------------------------------------------------------------------------------------------------------------------------------|

$$\text{Atom Economy} = \frac{\text{Mass of desired useful product}}{\text{Total Mass of all reactants}} \times 100 = \frac{353.22}{372.20 + 18.02 + 88.02 + 218.33} \times 100 = 51.00\%$$

$$\text{Environmental Factor} = \frac{\text{Mass of total waste}}{\text{Mass of desired product}} = \frac{13.81 + 74.44 + 58.44 + 336.04 + 72.92 + 486.54 + 4510.00}{349.69} = 15.88$$

$$\text{Reaction Mass Efficiency} = \frac{\text{actual mass of desired product}}{\text{mass of reactants}} \times 100 = \frac{349.69}{218.33 + 987.12 + 176.04 + 13.81} \times 100 = 25.00 \%$$

It is worth pointing out that we considered in our E-Factor calculations the amount of solvent used for the recovery of the product. If this value is neglected (due to the reusability of the solvent after distillation under reduced pressure), the E-Factor of our procedure should be:

$$\text{Environmental Factor} = \frac{\text{Mass of total waste}}{\text{Mass of desired product}} = \frac{13.81 + 74.44 + 58.44 + 336.04 + 72.92 + 486.54 + \text{(4510.00)}}{349.69} = 2.98$$

**Ecoscale calculator**

| Reagents                            |             |                    |           |           |         |         |          |          |        |        |
|-------------------------------------|-------------|--------------------|-----------|-----------|---------|---------|----------|----------|--------|--------|
| Link                                | identifier* | name               | MF*       | MW        | density | purity* | ml       | g        | mmoles | equiv. |
| <input checked="" type="checkbox"/> |             | Phenyl disulfide   | C12H10S2  | 218.3314  | 1.353   | 100%    | 0.161368 | 0.218331 | 1      | 1      |
|                                     |             | Hypochlorite salts | H10O6ClNa | 164.51857 |         | 100%    | 0        | 0.987111 | 6      | 6      |
|                                     |             | Sodium bisulfate   | HNaO4S    | 120.05531 | 2.1     | 100%    | 0.005717 | 0.012006 | 0.1    | 0.1    |

  

| Products    |                          |           |          |          |        |          |          |  |  |  |
|-------------|--------------------------|-----------|----------|----------|--------|----------|----------|--|--|--|
| identifier* | name                     | MF*       | MW       | g        | mmoles | g theor. | yield    |  |  |  |
|             | Benzenesulfonyl chloride | C6H5ClO2S | 176.6175 | 0.353235 | 2      | 0.176618 | 199.9994 |  |  |  |

  

| Conditions              |                                                                                                                            |                                          |     |      |        |       |      |  |  |  |
|-------------------------|----------------------------------------------------------------------------------------------------------------------------|------------------------------------------|-----|------|--------|-------|------|--|--|--|
| Reagents                | Name                                                                                                                       | mmoles                                   | eq. | Bp   | Hazard | Price |      |  |  |  |
|                         | Phenyl disulfide                                                                                                           | 2.02                                     | 1   | NaN  |        |       |      |  |  |  |
|                         | Hypochlorite salts                                                                                                         | 12.13                                    | 6   | 182  |        |       |      |  |  |  |
|                         | Sodium bisulfate                                                                                                           | 0.2                                      | 0.1 | 3600 |        |       |      |  |  |  |
| Yield                   | 99                                                                                                                         |                                          |     |      |        |       | -0.5 |  |  |  |
| Price / availability    |                                                                                                                            |                                          |     |      |        |       | -3   |  |  |  |
| Safety                  |                                                                                                                            |                                          |     |      |        |       | -5   |  |  |  |
| Technical setup         | Possible items<br>Common set-up<br>Instruments for controlled addition of chemicals<br>Unconventional activation technique | Selected items<br>Common set-up          |     |      |        | 0     |      |  |  |  |
| Temperature / time      | Possible items<br>Room temperature, < 1h<br>Room temperature, < 24h<br>Heating, < 1h                                       | Selected items<br>Room temperature, < 1h |     |      |        | 0     |      |  |  |  |
| Workup and purification | Possible items<br>None<br>Cooling to room temperature<br>Adding solvent                                                    | Selected items<br>Adding solvent         |     |      |        | 0     |      |  |  |  |
| <b>EcoScale</b>         |                                                                                                                            |                                          |     |      |        |       | 91.5 |  |  |  |

### Calculation of Green Chemistry Metrics (*solution method*)<sup>34</sup>

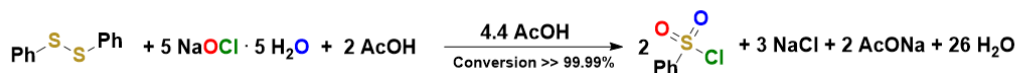

M.W. 218.33 g/mol  
Used 218.33 mg

M.W. 164.52 g/mol  
Used 822.60 mg

M.W. 60.05 g/mol  
Used 120.10 mg

M.W. 60.05 g/mol  
Waste 264.22 mg

M.W. 176.61  
Prod. 310.83

**Waste by-products**  
175.32 mg + 164.07 mg + 468.40 mg

**Purification**  
4 mL H<sub>2</sub>O (d = 1.00 g/mL)  
4000 mg  
45 mL CH<sub>2</sub>Cl<sub>2</sub> (d = 1.33 g/mL)  
59850 mg

$$\text{Atom Economy} = \frac{\text{Mass of desired useful product}}{\text{Total Mass of all reactants}} \times 100 = \frac{353.22}{218.33 + 329.04 + 60.05} \times 100 = 58\%$$

$$\text{Environmental Factor} = \frac{\text{Mass of total waste}}{\text{Mass of desired product}} = \frac{264.22 + 175.32 + 164.07 + 468.40 + 4000 + 59850}{310.83} = 208.87$$

$$\text{Reaction Mass Efficiency} = \frac{\text{actual mass of desired product}}{\text{mass of reactants}} \times 100 = \frac{310.83}{218.33 + 822.60 + 120.10 + 264.22} \times 100 = 21.80 \%$$

Ecoscale calculator

| Reagents |             |                    |           |           |         |         |          |          |             |           |
|----------|-------------|--------------------|-----------|-----------|---------|---------|----------|----------|-------------|-----------|
| Link     | identifier* | name               | MF*       | MW        | density | purity* | ml       | g        | mmoles      | equiv.    |
| 1        |             | Phenyl disulfide   | C12H10S2  | 218.3314  | 1.353   | 100%    | 0.161368 | 0.218331 | 1           | 1         |
| 2        |             | Hypochlorite salts | H10O6ClNa | 164.51857 |         | 100%    | 0        | 0.822593 | 5           | 5         |
| 3        |             | Acetic acid        | C2H4O2    | 60.05256  | 1.048   | 100%    | 0.366718 | 0.38432  | 6.399727123 | 6.3997271 |

  

| Products    |                          |           |          |          |        |          |          |  |  |  |
|-------------|--------------------------|-----------|----------|----------|--------|----------|----------|--|--|--|
| identifier* | name                     | MF*       | MW       | g        | mmoles | g theor  | yield    |  |  |  |
|             | Benzenesulfonyl chloride | C6H5ClO2S | 176.6175 | 0.353235 | 2      | 0.176618 | 199.9994 |  |  |  |

  

| Conditions                                       |        |      |                                       |        |       |    |  |  |  |  |
|--------------------------------------------------|--------|------|---------------------------------------|--------|-------|----|--|--|--|--|
| Reagents                                         |        |      |                                       |        |       |    |  |  |  |  |
| Name                                             | mmoles | eq.  | Bp                                    | Hazard | Price |    |  |  |  |  |
| Phenyl disulfide                                 | 2.83   | 1    | NaN                                   |        |       |    |  |  |  |  |
| Hypochlorite salts                               | 14.15  | 5    |                                       |        |       |    |  |  |  |  |
| Acetic acid                                      | 18.11  | 6.39 | 251                                   |        |       |    |  |  |  |  |
| Yield                                            |        |      |                                       |        |       |    |  |  |  |  |
| 00                                               |        |      |                                       |        |       | -6 |  |  |  |  |
| Price / availability                             |        |      |                                       |        |       |    |  |  |  |  |
|                                                  |        |      |                                       |        |       | -3 |  |  |  |  |
| Safety                                           |        |      |                                       |        |       |    |  |  |  |  |
|                                                  |        |      |                                       |        |       | -5 |  |  |  |  |
| Technical setup                                  |        |      |                                       |        |       |    |  |  |  |  |
| Possible items                                   |        |      | Selected items                        |        |       |    |  |  |  |  |
| Common set-up                                    |        |      | Common set-up                         |        |       |    |  |  |  |  |
| Instruments for controlled addition of chemicals |        |      |                                       |        |       |    |  |  |  |  |
| Unconventional activation technique              |        |      |                                       |        |       |    |  |  |  |  |
| Temperature / time                               |        |      |                                       |        |       |    |  |  |  |  |
| Possible items                                   |        |      | Selected items                        |        |       |    |  |  |  |  |
| Room temperature, < 1h                           |        |      | Room temperature, < 1h                |        |       |    |  |  |  |  |
| Room temperature, < 24h                          |        |      |                                       |        |       |    |  |  |  |  |
| Heating, < 1h                                    |        |      |                                       |        |       |    |  |  |  |  |
| Workup and purification                          |        |      |                                       |        |       |    |  |  |  |  |
| Possible items                                   |        |      | Selected items                        |        |       |    |  |  |  |  |
| None                                             |        |      | Adding solvent                        |        |       |    |  |  |  |  |
| Cooling to room temperature                      |        |      | Liquid - liquid extraction or washing |        |       |    |  |  |  |  |
| Adding solvent                                   |        |      |                                       |        |       |    |  |  |  |  |
| EcoScale                                         |        |      |                                       |        |       | 83 |  |  |  |  |

### Calculation of Green Chemistry Metrics (*this mechanochemical method*)

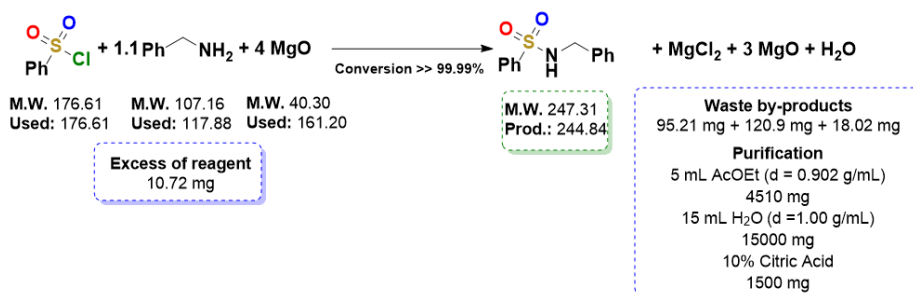

$$\text{Atom Economy} = \frac{\text{Mass of desired useful product}}{\text{Total Mass of all reactants}} \times 100 = \frac{247.31}{176.61 + 107.16 + 40.30} \times 100 = 76\%$$

$$\text{Environmental Factor} = \frac{\text{Mass of total waste}}{\text{Mass of desired product}} = \frac{95.21 + 120.9 + 18.02 + 4510 + 15000 + 1500 + 10.72}{244.84} = 86.81$$

$$\text{Reaction Mass Efficiency} = \frac{\text{actual mass of desired product}}{\text{mass of reactants}} \times 100 = \frac{244.84}{176.61 + 117.88 + 161.20} \times 100 = 53.7\%$$

It is worth pointing out that we considered in our E-Factor calculations the amount of solvent used for the recovery of the product, and both the solvent and the acid mass for the purification washes. If the value for all of this is neglected (due to the reusability of the solvent after distillation under reduced pressure), the E-Factor of our procedure should be:

$$\text{Environmental Factor} = \frac{\text{Mass of total waste}}{\text{Mass of desired product}} = \frac{95.21 + 120.9 + 18.02 + \cancel{(+ 4510 + 15000 + 1500)} + 10.72}{244.84} = 1.00$$

**Ecoscale calculator**

| Reagents |             |                          |           |           |         |         |          |          |        |        |
|----------|-------------|--------------------------|-----------|-----------|---------|---------|----------|----------|--------|--------|
| Link     | identifier* | name                     | MF*       | MW        | density | purity* | ml       | g        | mmoles | equiv. |
|          | 1           | Benzenesulfonyl chloride | C6H5ClO2S | 176.6175  | 1.384   | 100%    | 0.127614 | 0.176618 | 1      | 1      |
|          | 2           | Benzylamine              | C7H9N     | 107.15516 | 0.98    | 100%    | 0.120277 | 0.117871 | 1.1    | 1.1    |
|          | 3           | Magnesium oxide          | MgO       | 40.3044   | 3.58    | 100%    | 0.045033 | 0.161218 | 4      | 4      |

  

| Products    |                                    |            |           |          |        |          |              |
|-------------|------------------------------------|------------|-----------|----------|--------|----------|--------------|
| identifier* | name                               | MF*        | MW        | g        | mmoles | g theor. | yield        |
|             | N-(phenylmethyl)benzenesulfonamide | C13H13NO2S | 247.31172 | 0.494623 | 2      | 0.247312 | 199.99960000 |

  

| Conditions |                          |        |     |      |        |       |
|------------|--------------------------|--------|-----|------|--------|-------|
| Reagents   | Name                     | mmoles | eq. | Bp   | Hazard | Price |
|            | Benzenesulfonyl chloride | 2.83   | 1   | 251  |        |       |
|            | Benzylamine              | 3.11   | 1.1 | 182  |        |       |
|            | Magnesium oxide          | 11.32  | 4   | 3600 |        |       |

  

|                         |                                       |      |
|-------------------------|---------------------------------------|------|
| Yield                   | 99                                    | -0.5 |
| Price / availability    | None                                  | 0    |
| Safety                  | None                                  | 0    |
| Technical setup         | Common set-up                         | 0    |
| Temperature / time      | Room temperature, < 24h               | -1   |
| Workup and purification | Liquid - liquid extraction or washing | -3   |

**EcoScale** 95.5

### Calculation of Green Chemistry Metrics (*solution method*)<sup>35</sup>

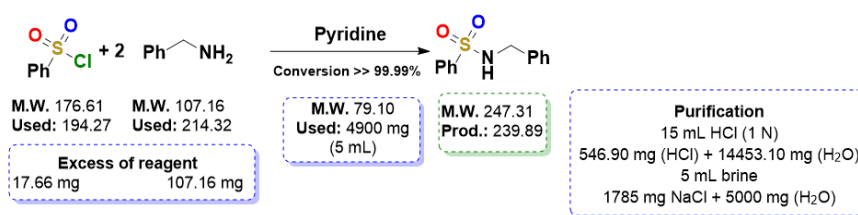

$$\text{Atom Economy} = \frac{\text{Mass of desired useful product}}{\text{Total Mass of all reactants}} \times 100 = \frac{247.31}{176.61 + 107.16 + 79.10} \times 100 = 68.2\%$$

$$\text{Environmental Factor} = \frac{\text{Mass of total waste}}{\text{Mass of desired product}} = \frac{17.66 + 107.16 + 4900 + 546.90 + 14453.10 + 1785 + 5000}{239.89} = 111.76$$

$$\text{Reaction Mass Efficiency} = \frac{\text{actual mass of desired product}}{\text{mass of reactants}} \times 100 = \frac{239.89}{194.27 + 214.32 + 4900} \times 100 = 4.5\%$$

#### Ecoscale calculator

| Reagents                            |             |                          |           |           |         |         |          |          |              |            |
|-------------------------------------|-------------|--------------------------|-----------|-----------|---------|---------|----------|----------|--------------|------------|
| Link                                | identifier* | name                     | MF*       | MW        | density | purity* | ml       | g        | mmoles       | equiv.     |
| <input checked="" type="checkbox"/> |             | Benzenesulfonyl chloride | C6H5ClO2S | 176.6175  | 1.384   | 100%    | 0.127614 | 0.176618 | 1            | 1          |
|                                     |             | Benzylamine              | C7H9N     | 107.15516 | 0.98    | 100%    | 0.218684 | 0.21431  | 2            | 2          |
|                                     |             | Pyridine                 | C5H5N     | 79.1014   | 0.978   | 100%    | 5        | 4.89     | 61.819386256 | 61.8193862 |

  

| Products     |                                    |            |           |          |         |          |              |
|--------------|------------------------------------|------------|-----------|----------|---------|----------|--------------|
| identifier#: | name:                              | MF#:       | MW:       | g:       | mmoles: | g theor: | yield:       |
|              | N-(phenylmethyl)benzenesulfonamide | C13H13NO2S | 247.31172 | 0.494623 | 2       | 0.247312 | 199.99960000 |

  

| Conditions              |                                                                                                                      |        |       |     |        |                                                                                                 |
|-------------------------|----------------------------------------------------------------------------------------------------------------------|--------|-------|-----|--------|-------------------------------------------------------------------------------------------------|
| Reagents                | Name                                                                                                                 | mmoles | eq.   | Bp  | Hazard | Price                                                                                           |
|                         | Benzenesulfonyl chloride                                                                                             | 2.83   | 1     | 251 |        |                                                                                                 |
|                         | Benzylamine                                                                                                          | 5.66   | 2     | 182 |        |                                                                                                 |
|                         | Pyridine                                                                                                             | 175    | 61.81 | 115 |        |                                                                                                 |
| Yield                   |                                                                                                                      |        |       |     |        | 97                                                                                              |
| Price / availability    |                                                                                                                      |        |       |     |        | -1.5                                                                                            |
| Safety                  |                                                                                                                      |        |       |     |        | 0                                                                                               |
| Technical setup         | Possible items: Common set-up, Instruments for controlled addition of chemicals, Unconventional activation technique |        |       |     |        | Selected items: Common set-up                                                                   |
| Temperature / time      | Possible items: Heating, > 1h, Cooling to 0°C, Cooling, < 0°C                                                        |        |       |     |        | Selected items: Room temperature, < 24h, Cooling to 0°C                                         |
| Workup and purification | Possible items: Sublimation, Liquid - liquid extraction or washing, Classical chromatography                         |        |       |     |        | Selected items: Adding solvent, Classical chromatography, Liquid - liquid extraction or washing |
| EcoScale                |                                                                                                                      |        |       |     |        | 75.5                                                                                            |

**Please note:** Since not enough information are provided on the amount of sodium sulfate, silica and solvents used for the separation, they have been neglected in calculations for the purification process. Since neither the amount of hydrochloric acid solution was given, we considered a minimum 5 mL of HCl 1 N (3x5 mL = 15 mL) and a minimum of 5 mL of brine (solubility of NaCl in water: 358 g/L).

## 7. Spectra

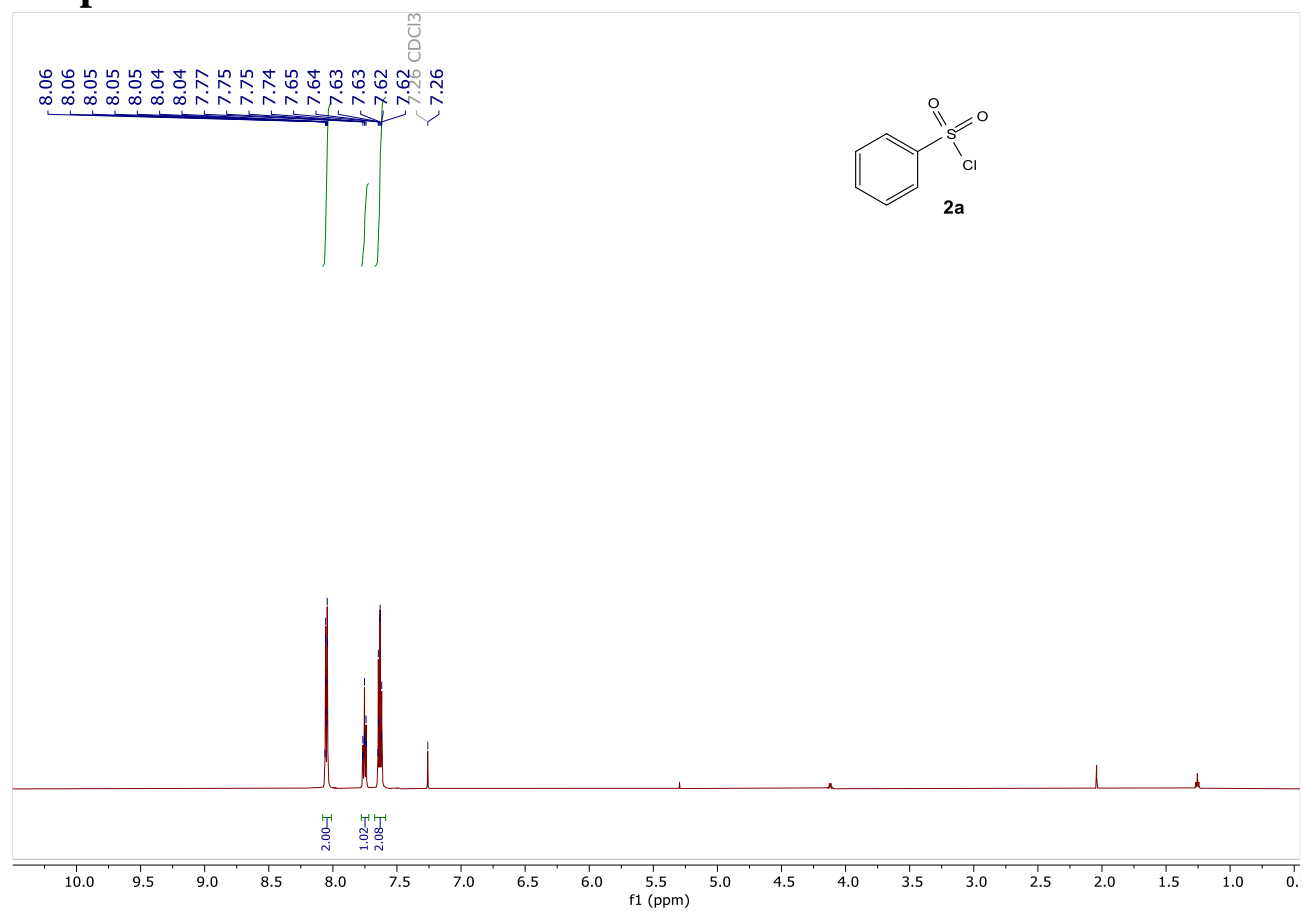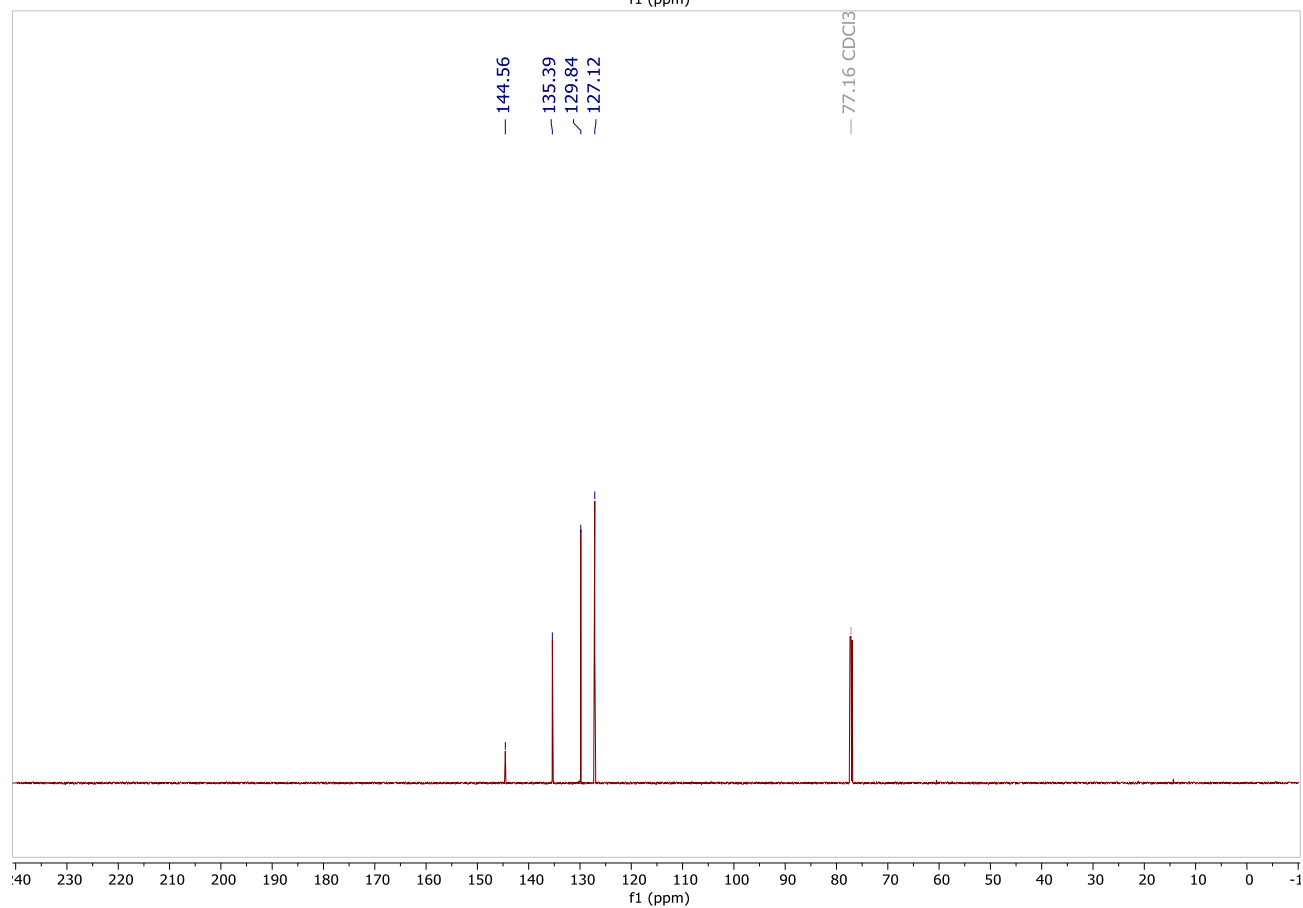

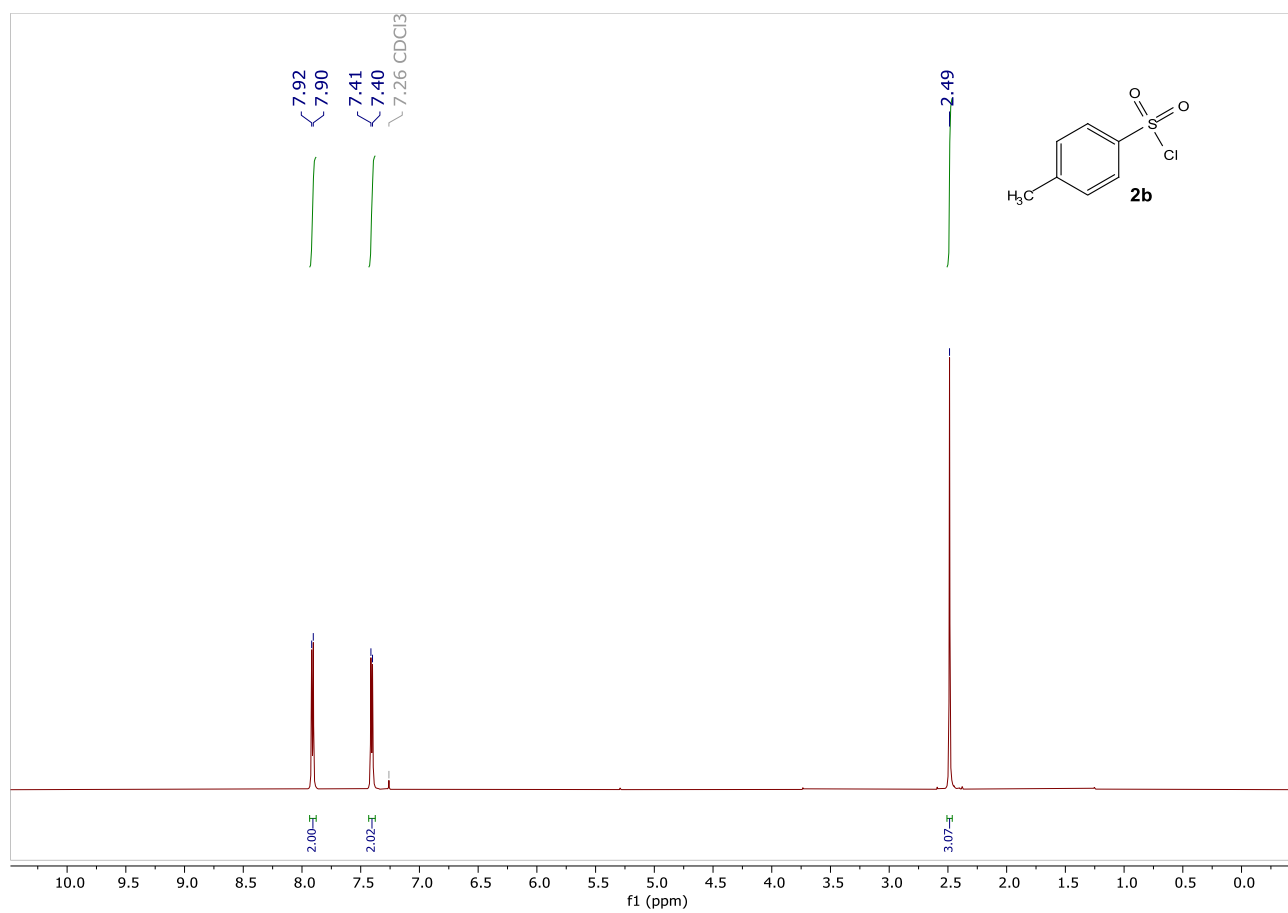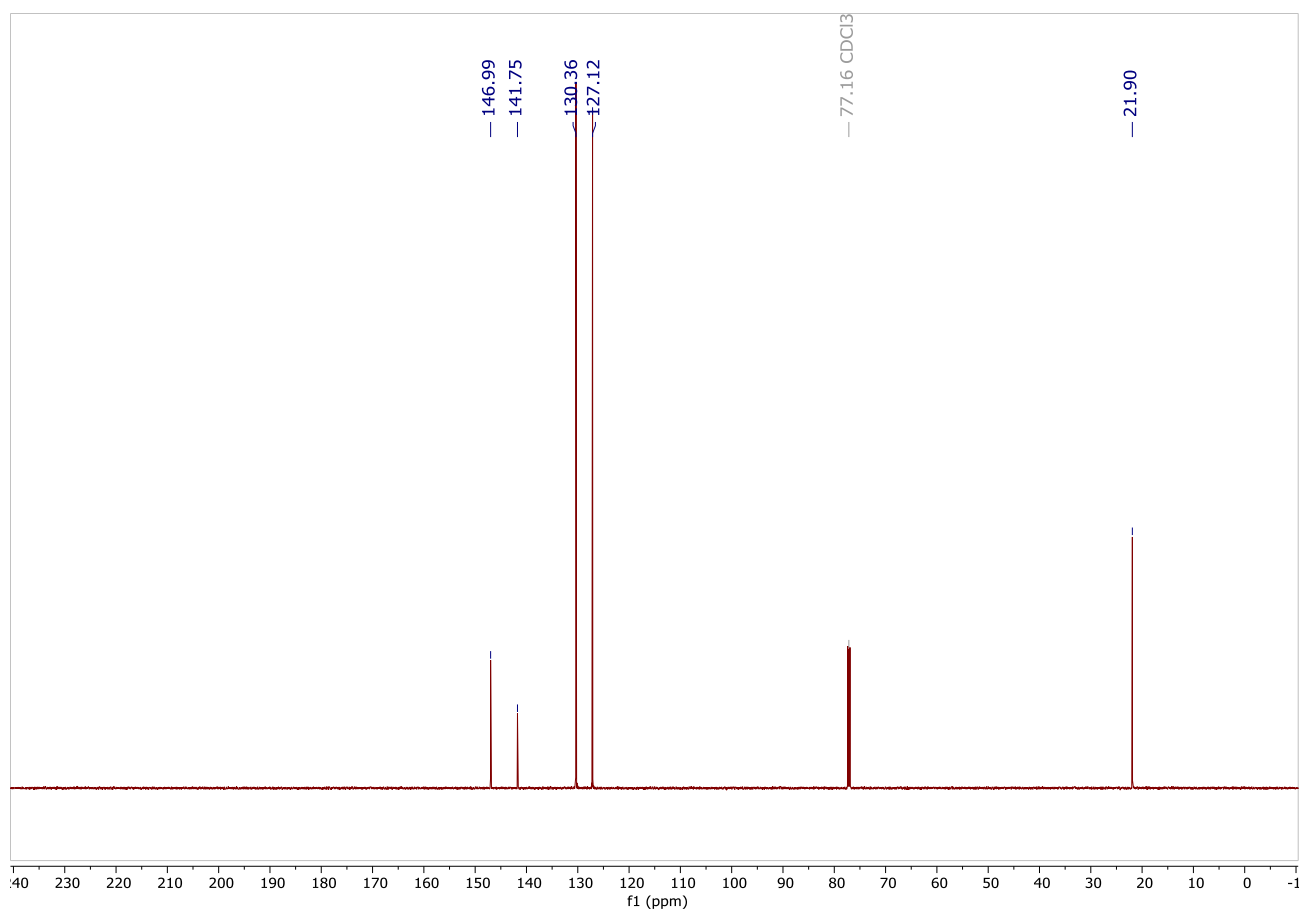



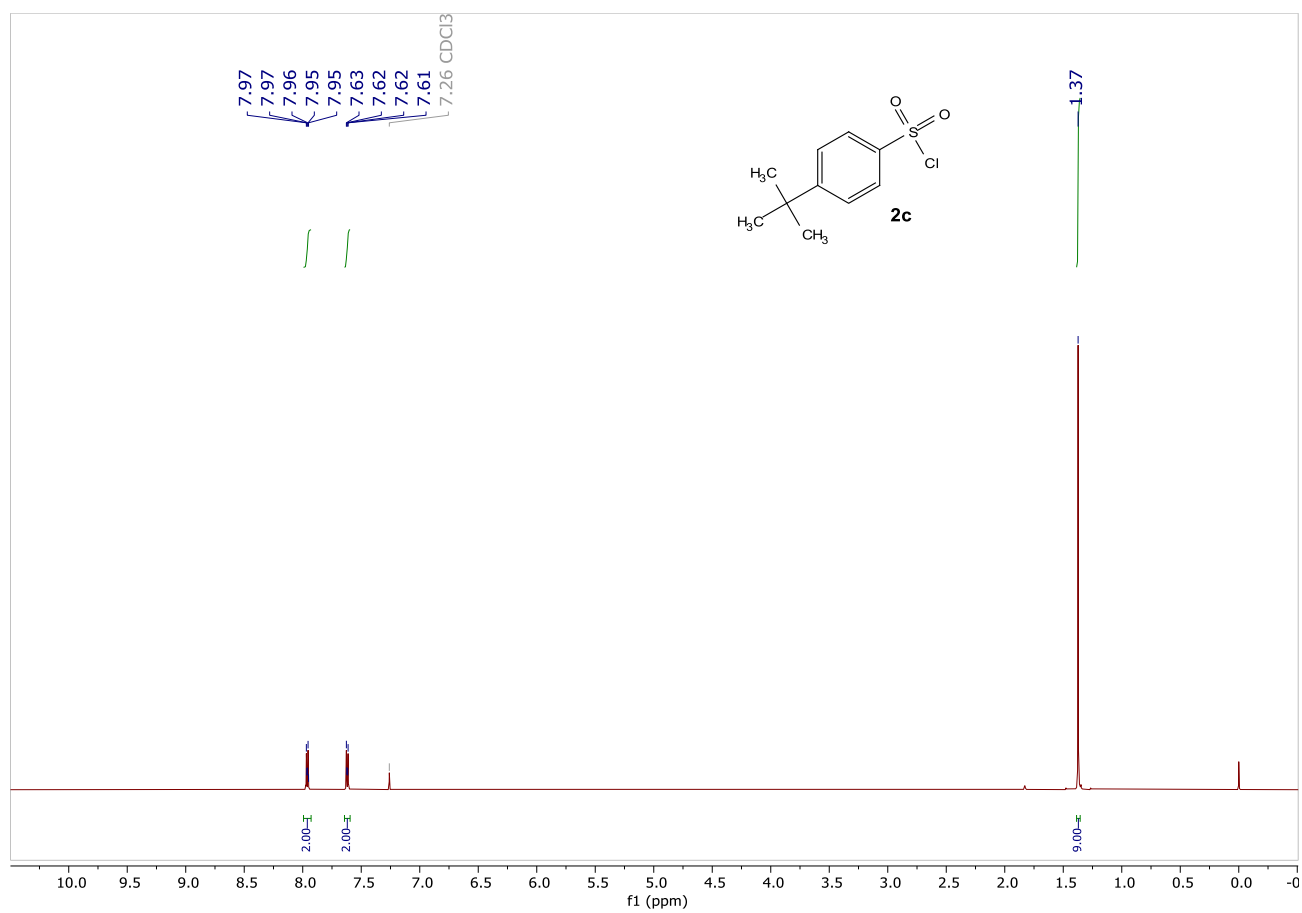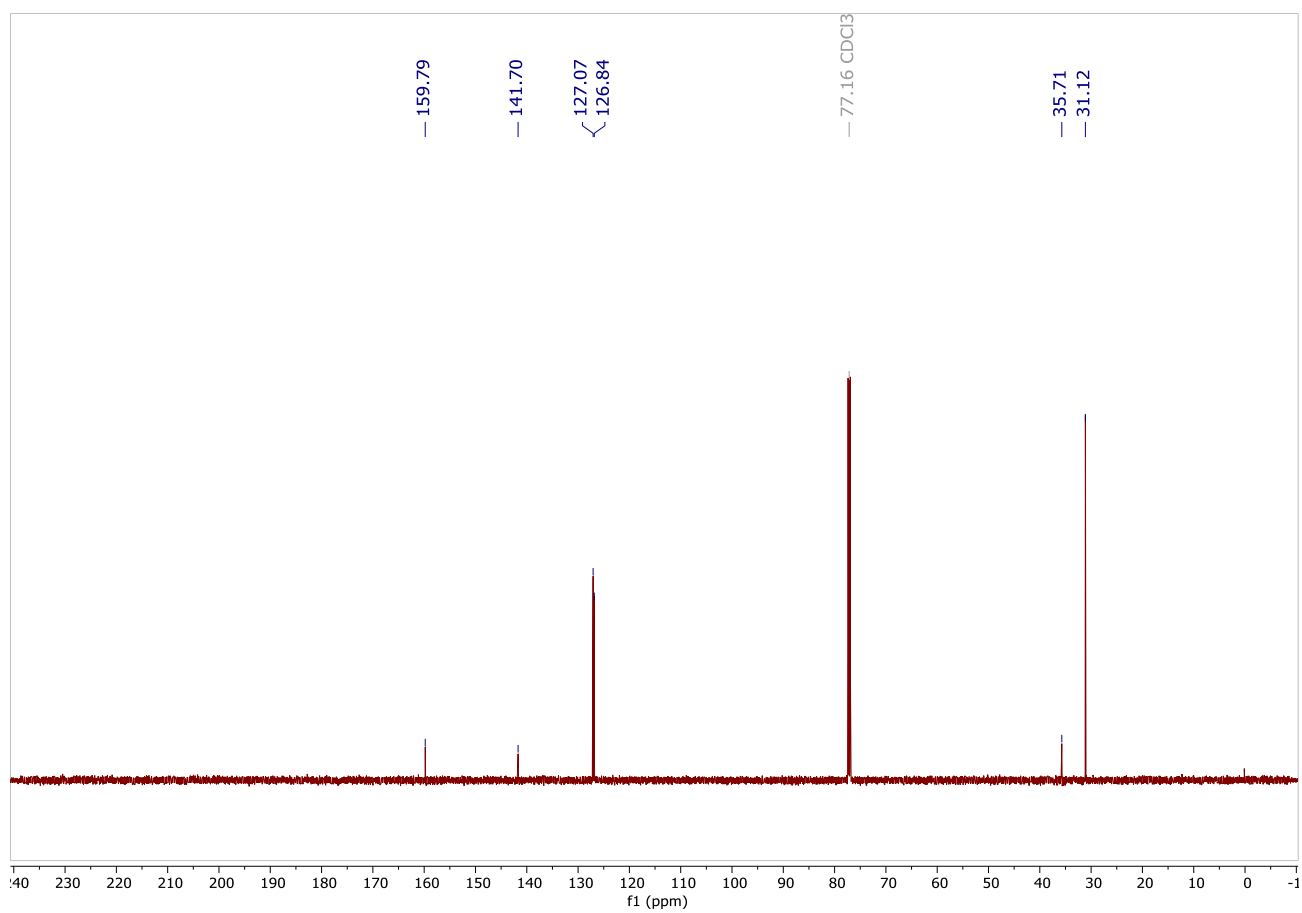

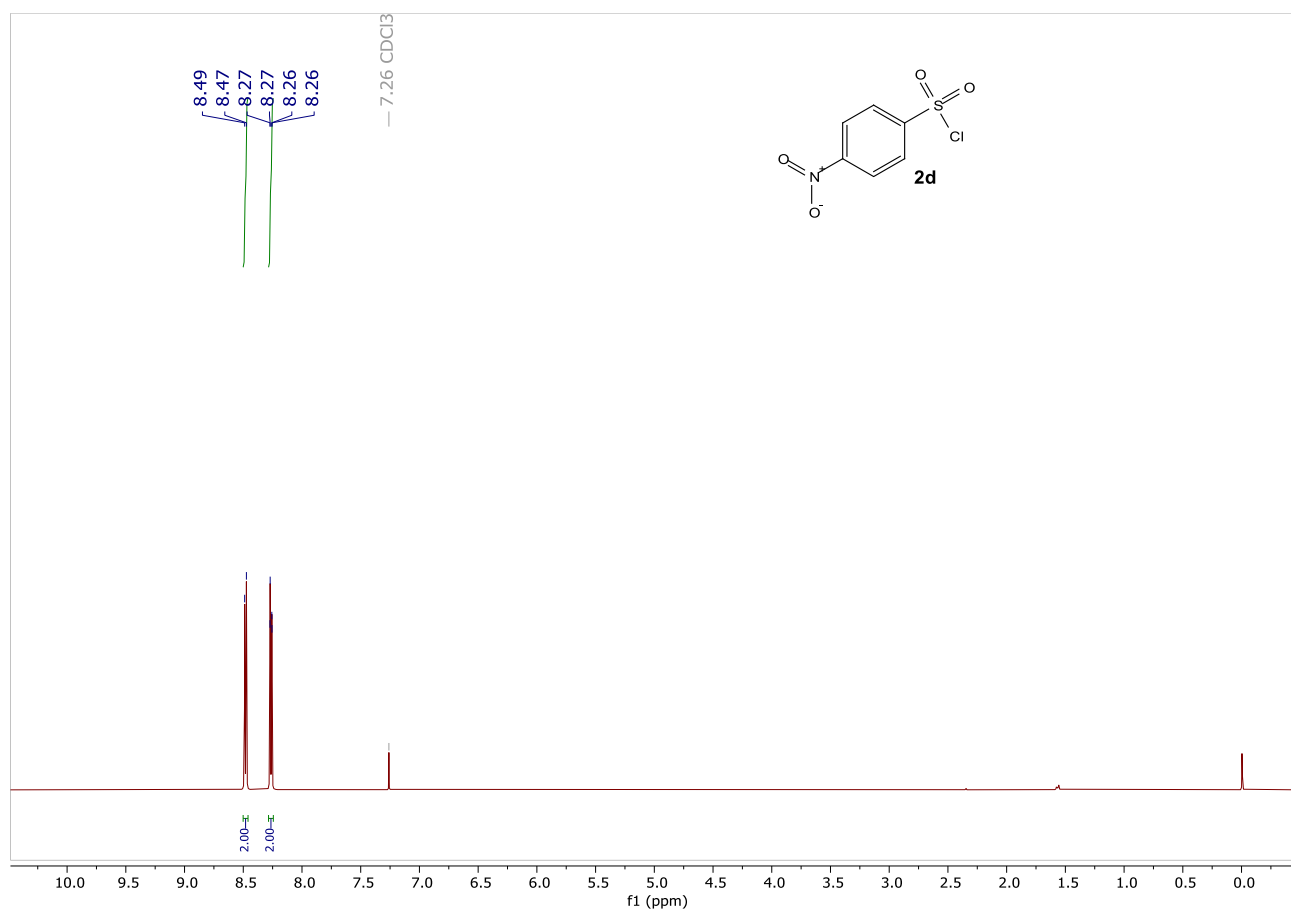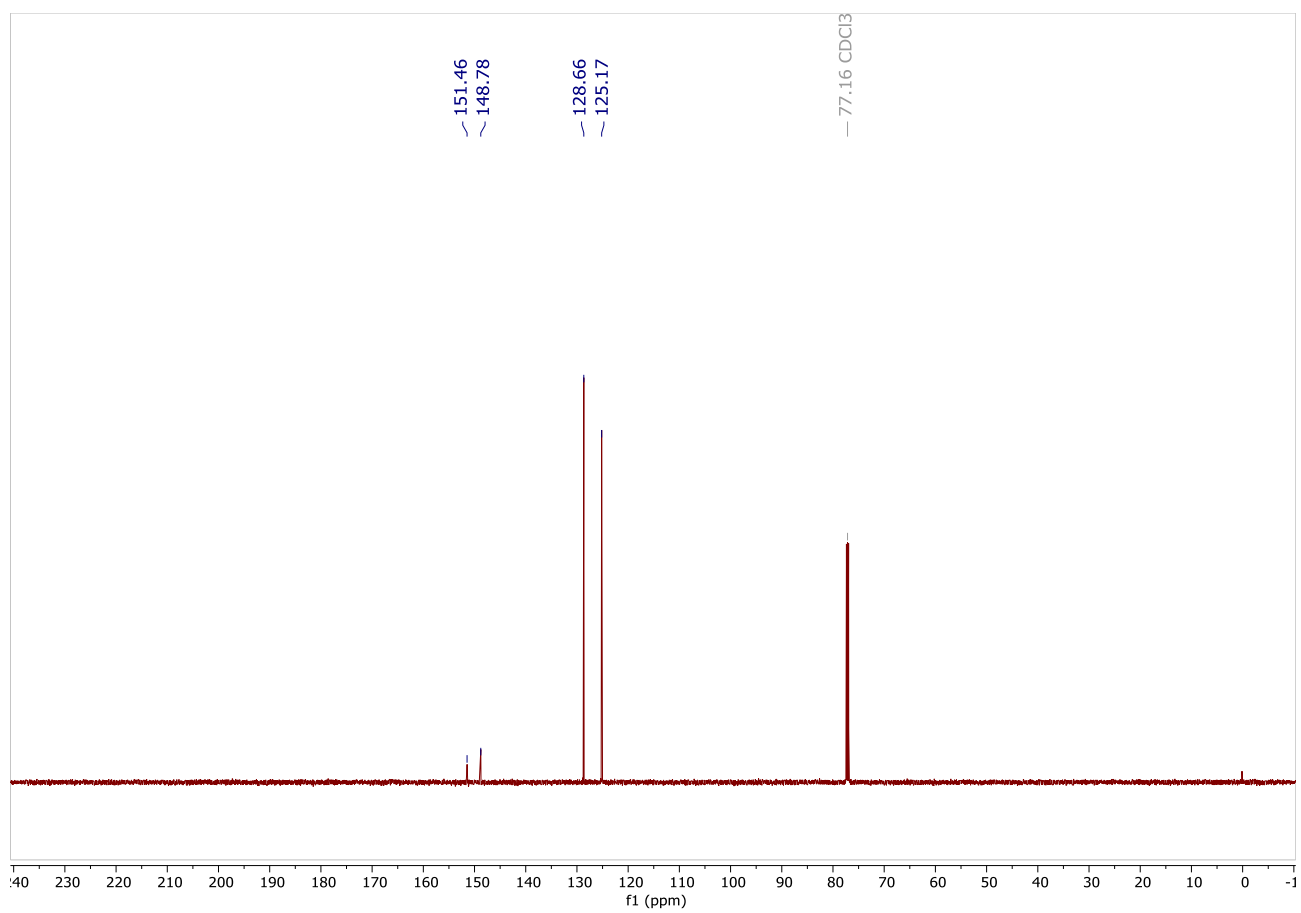

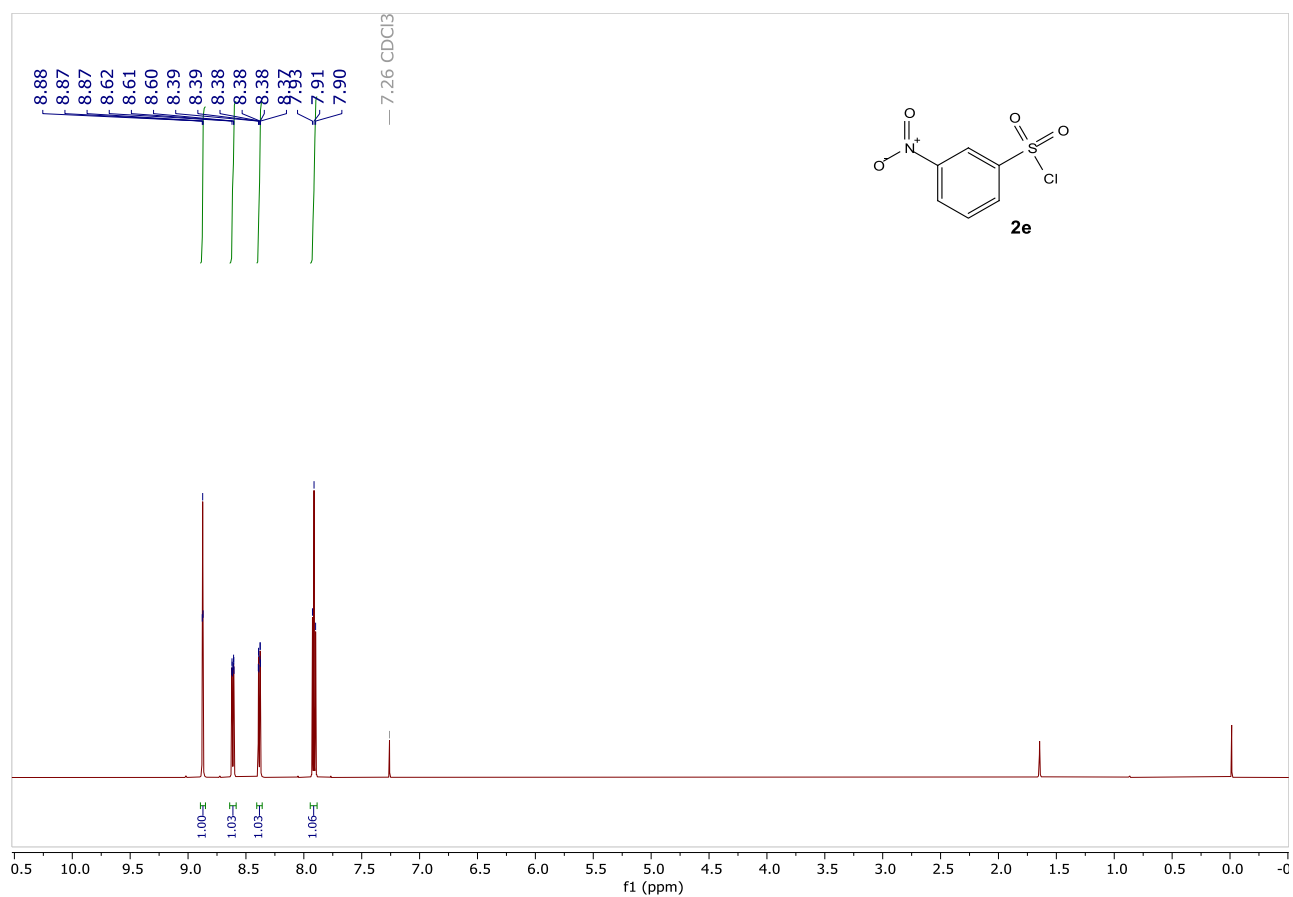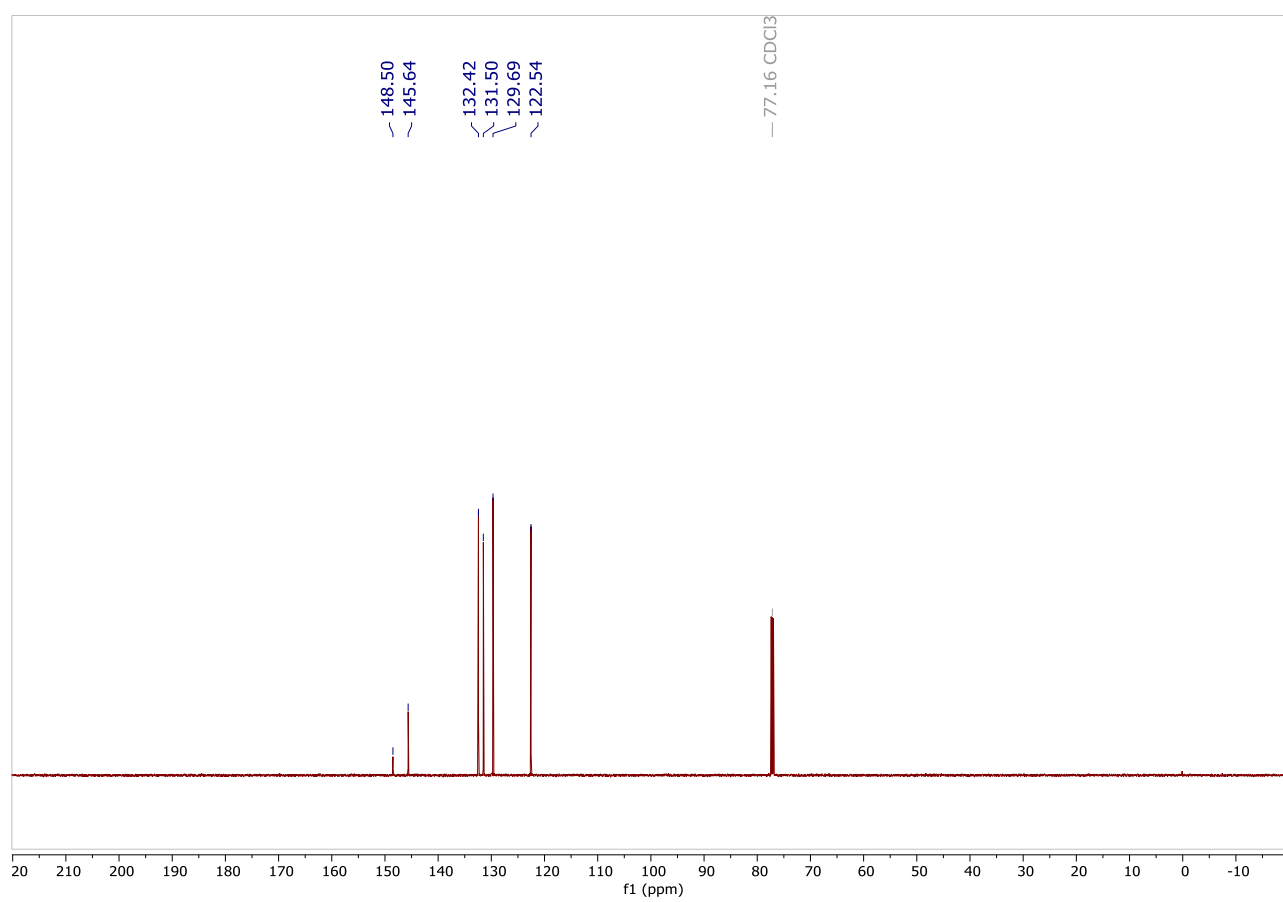

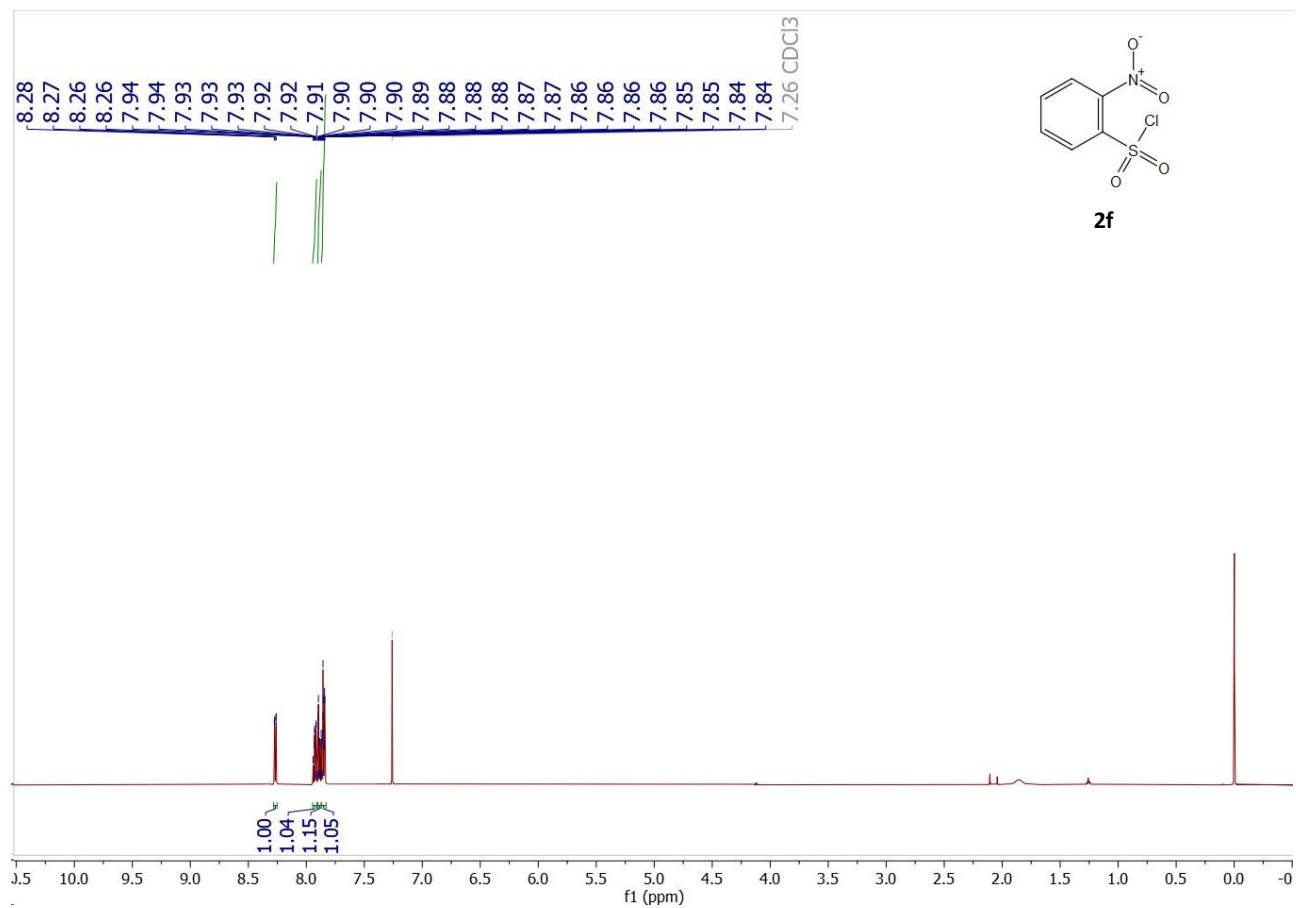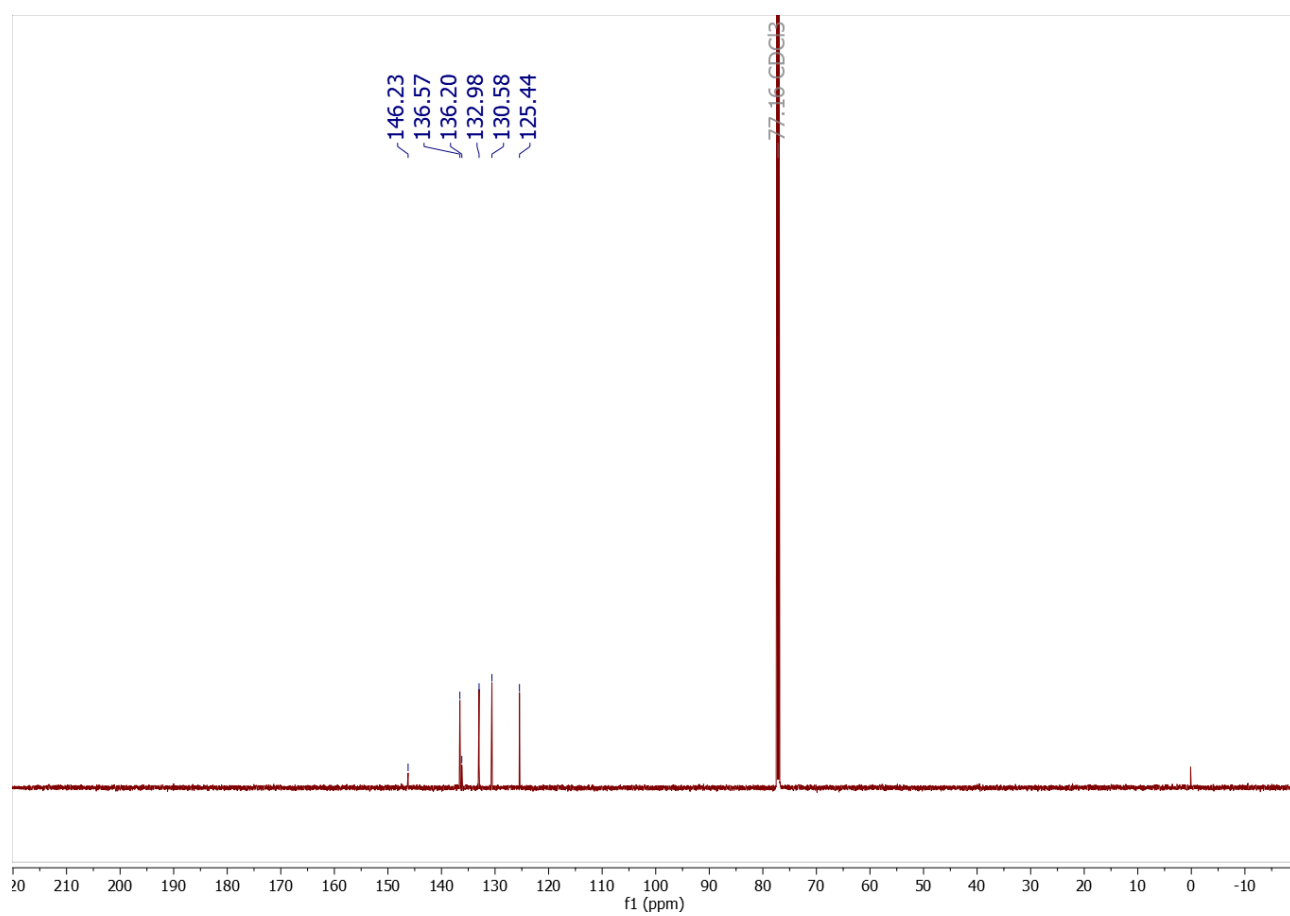

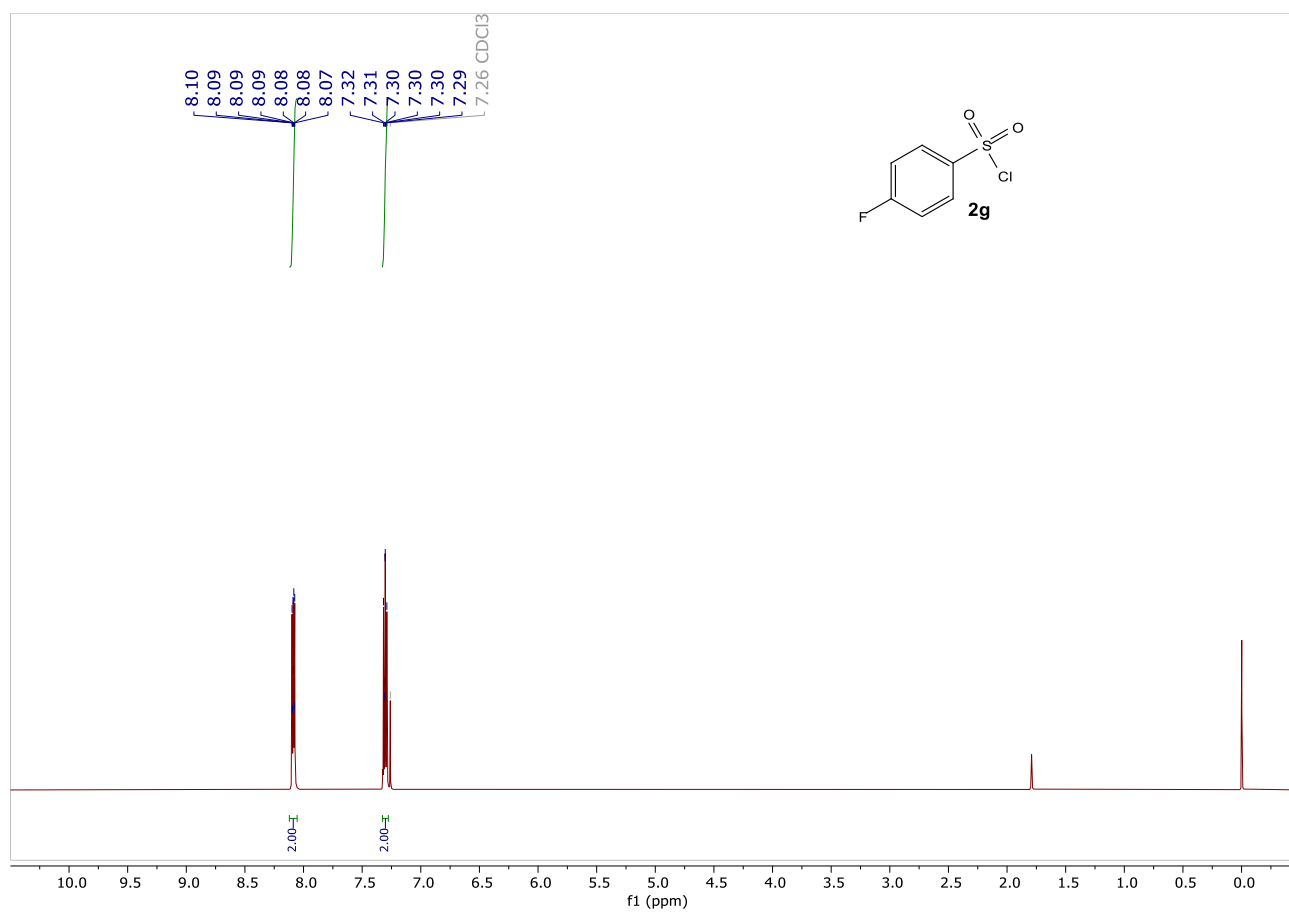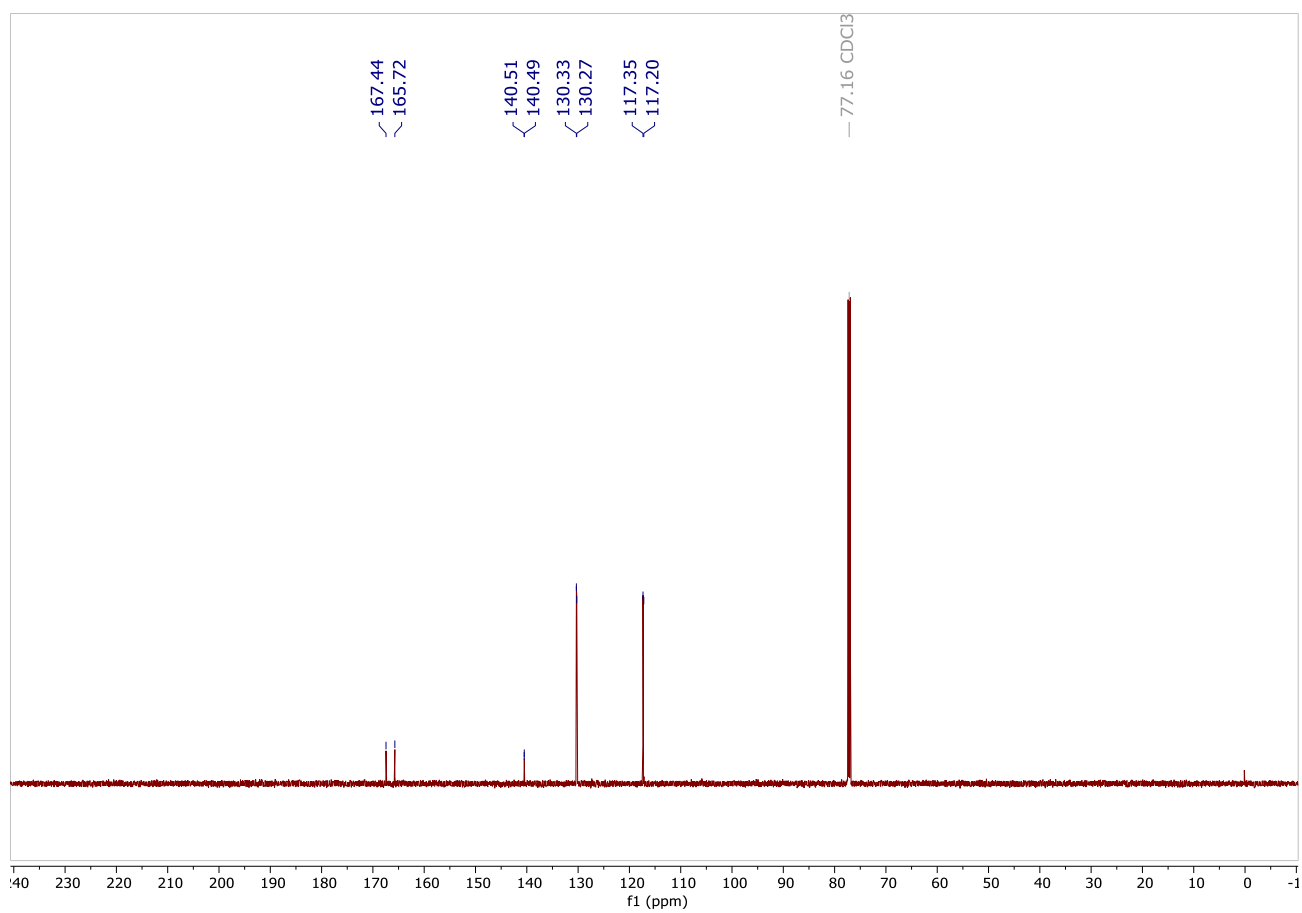

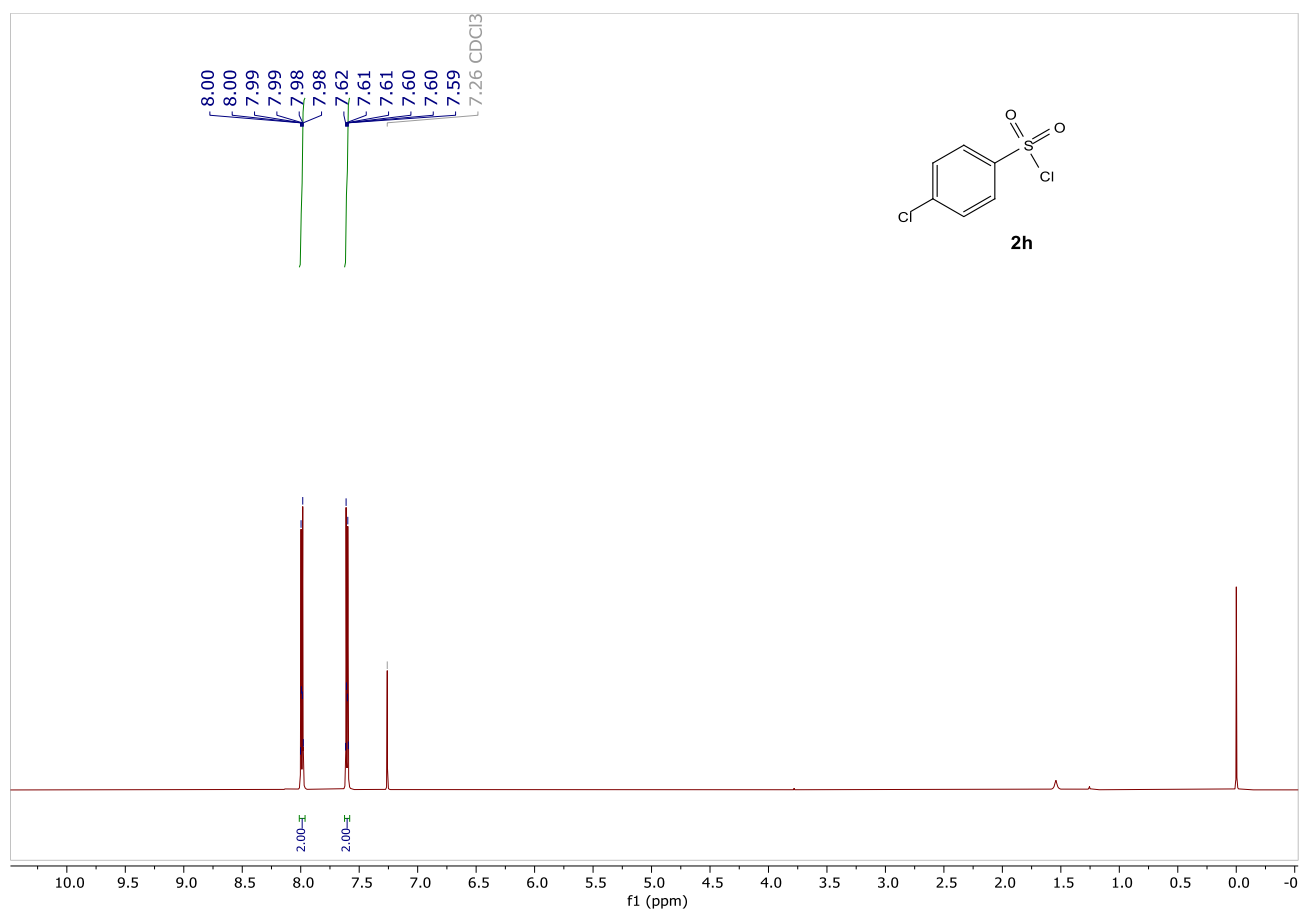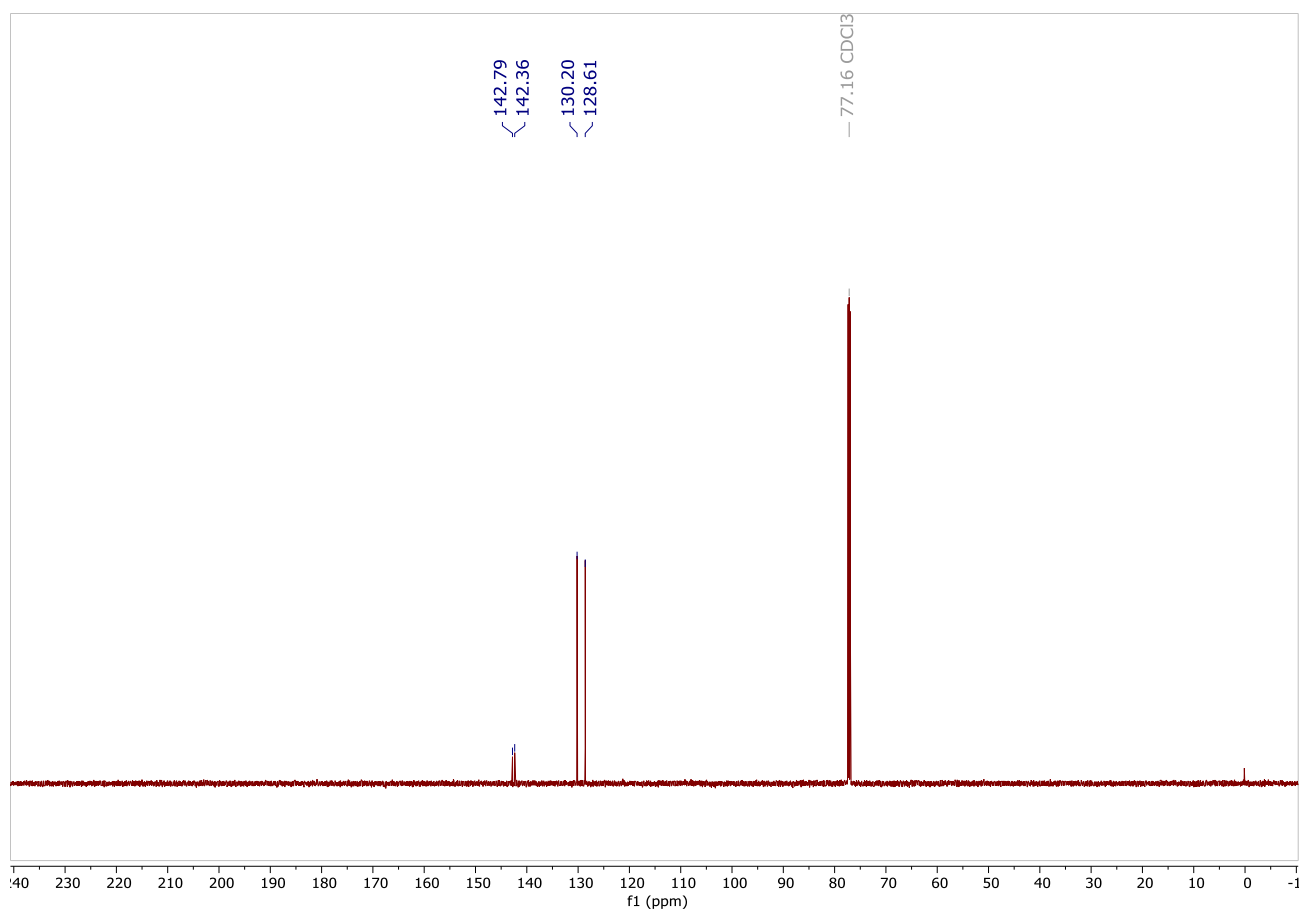

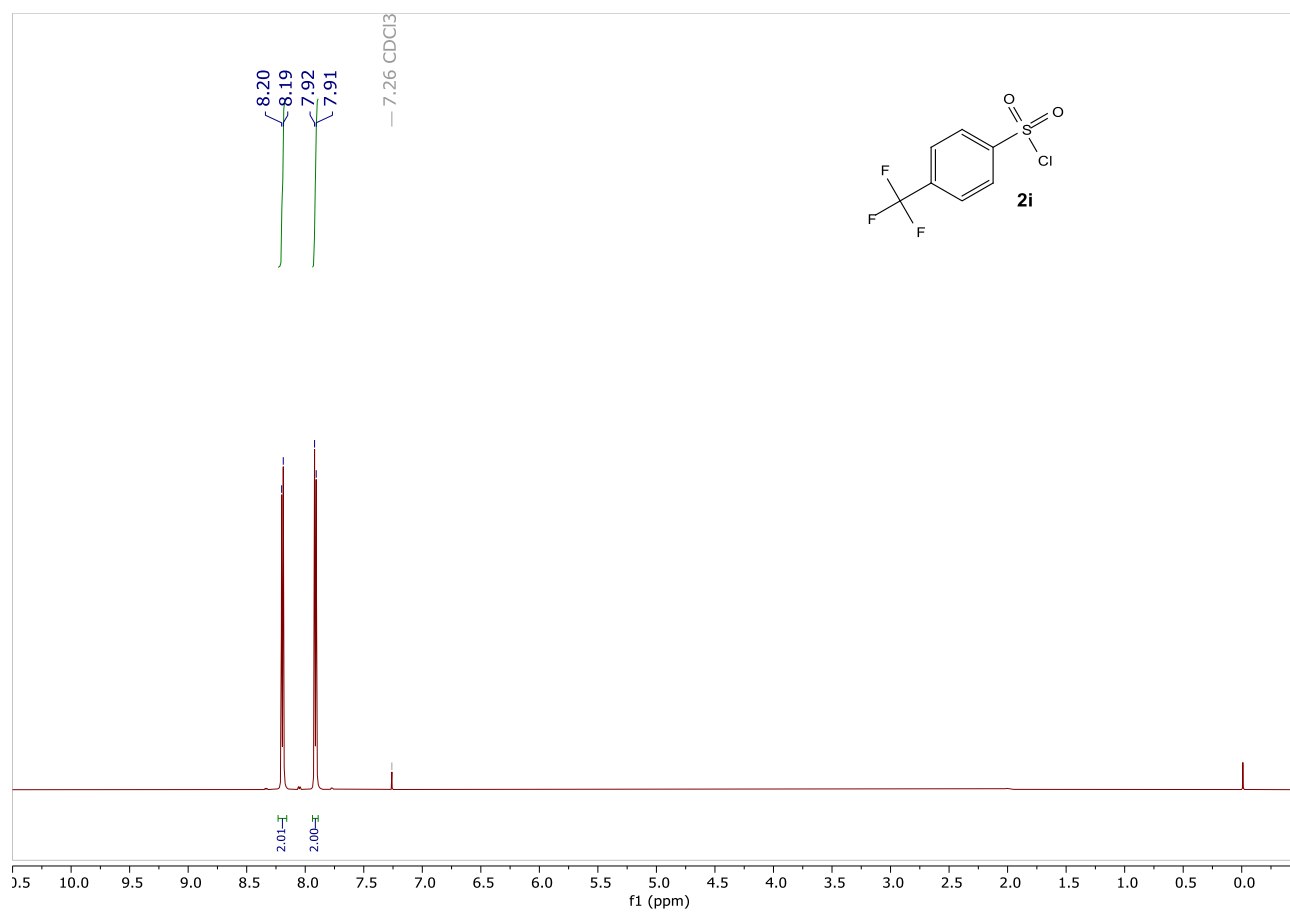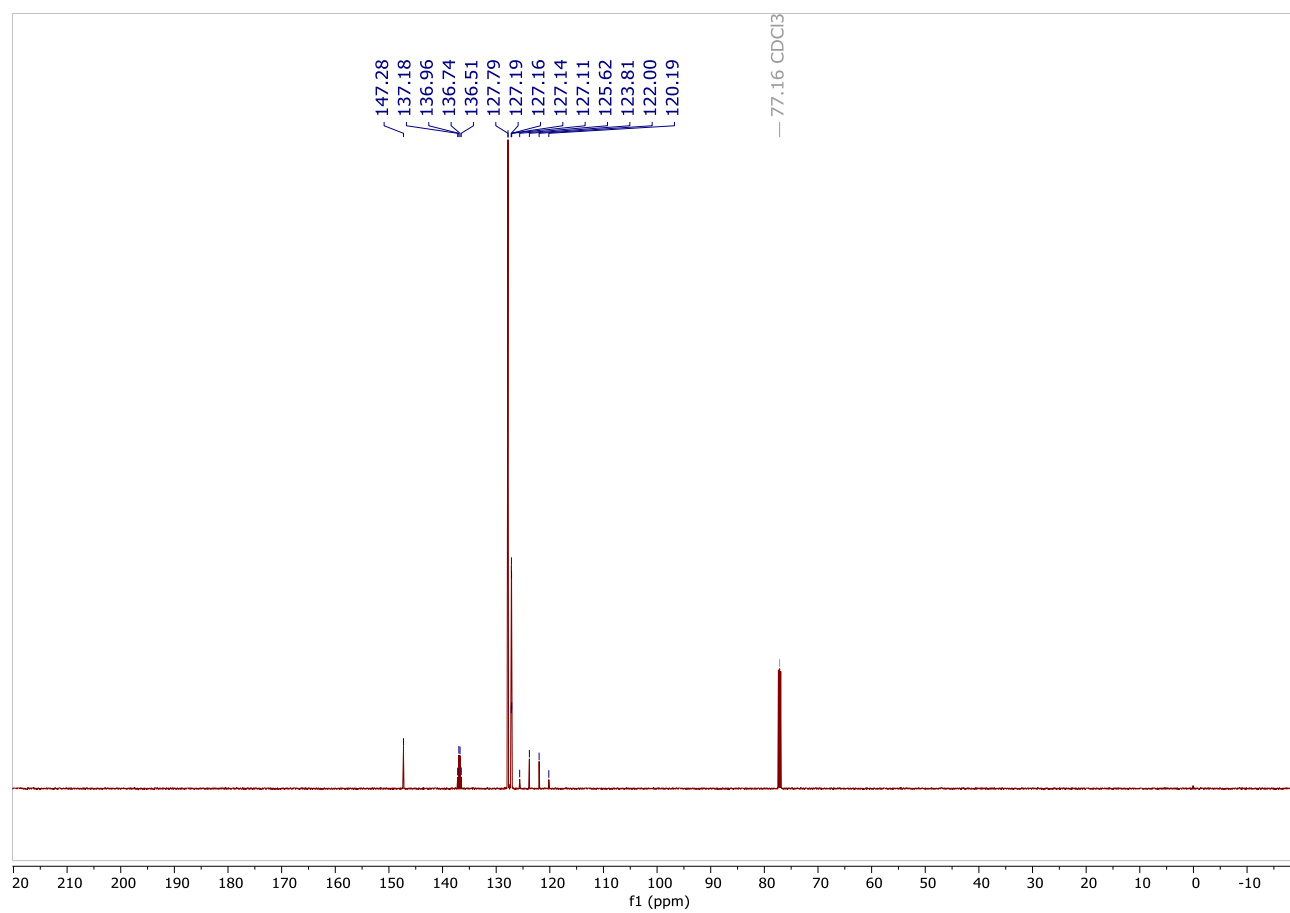

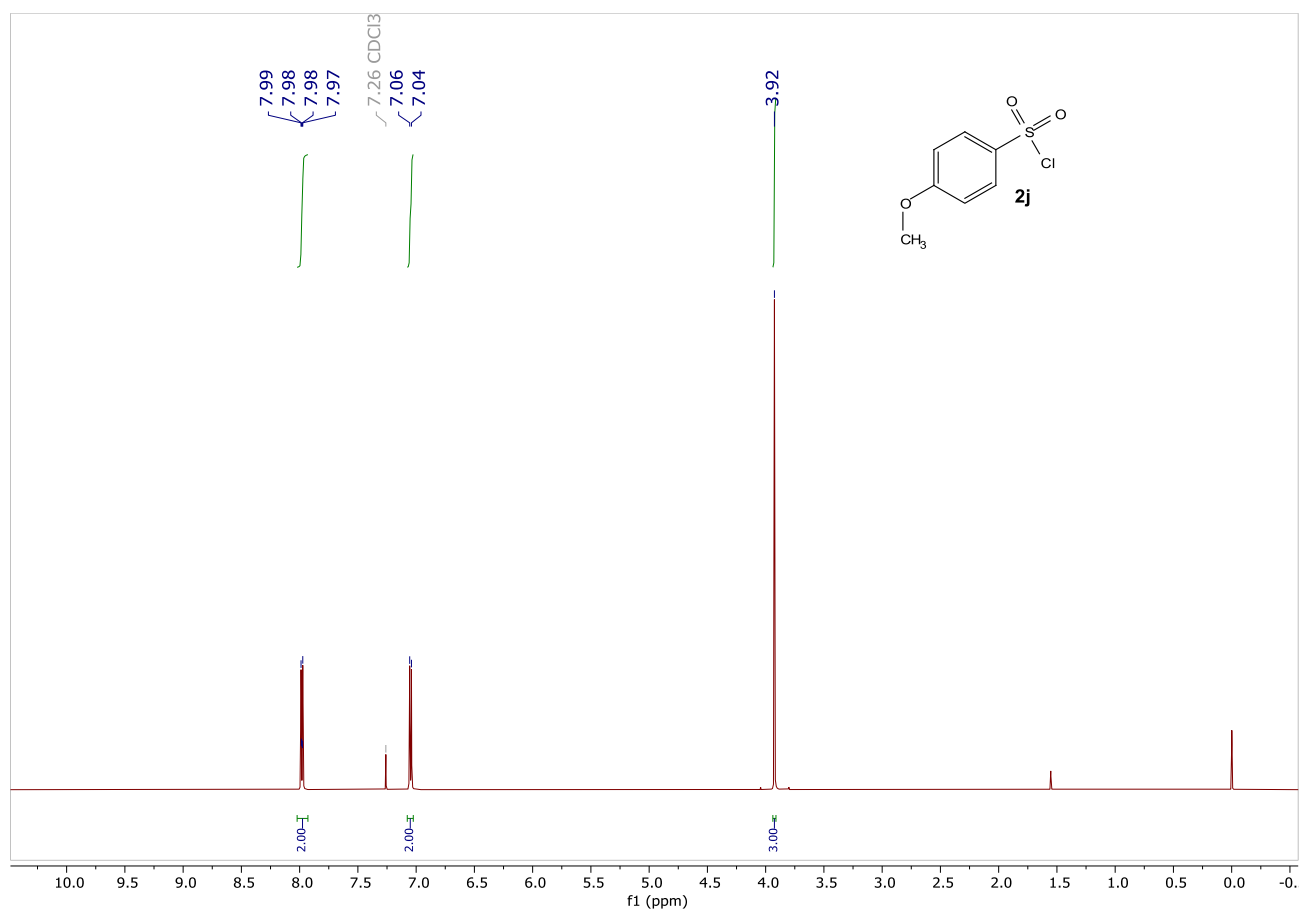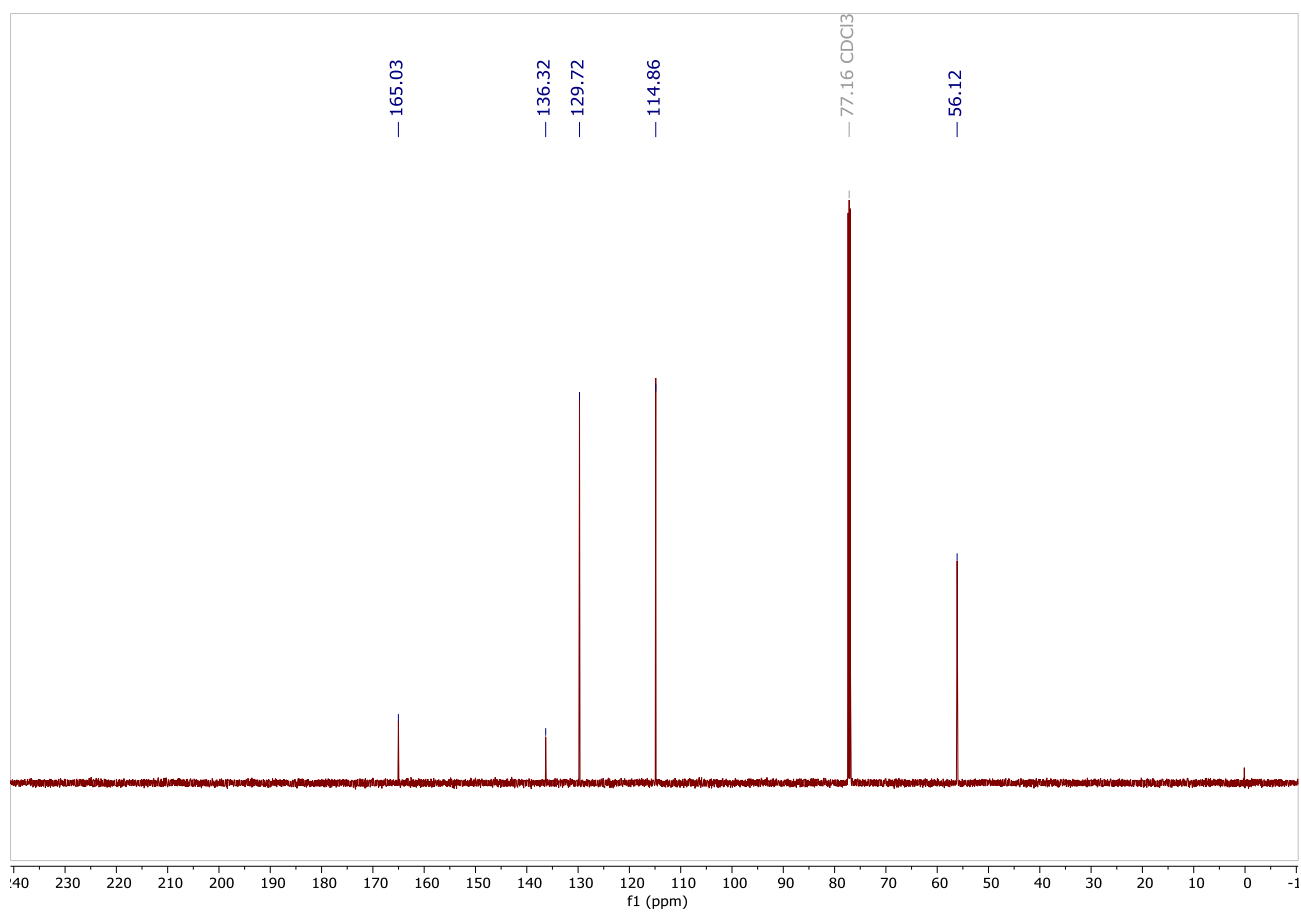



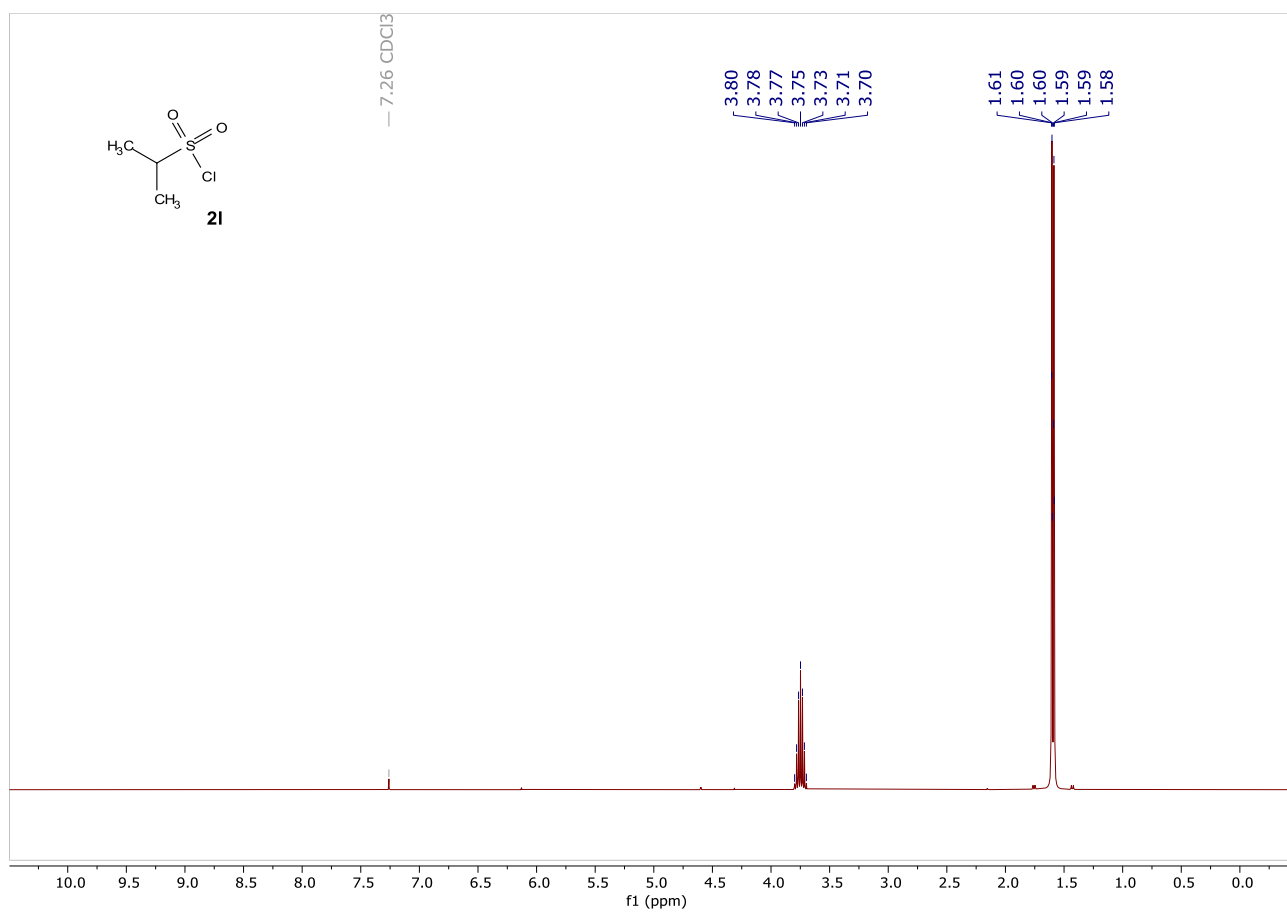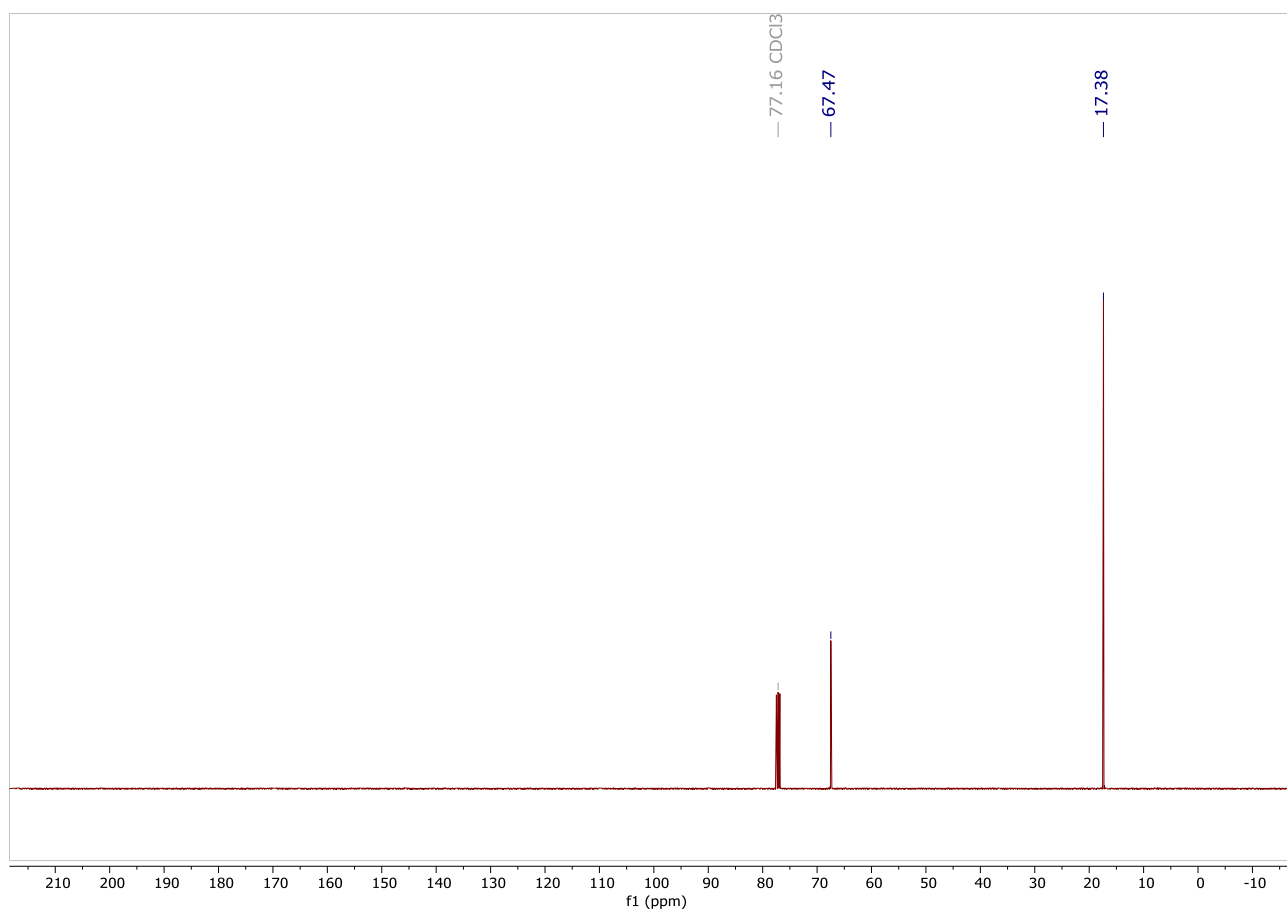

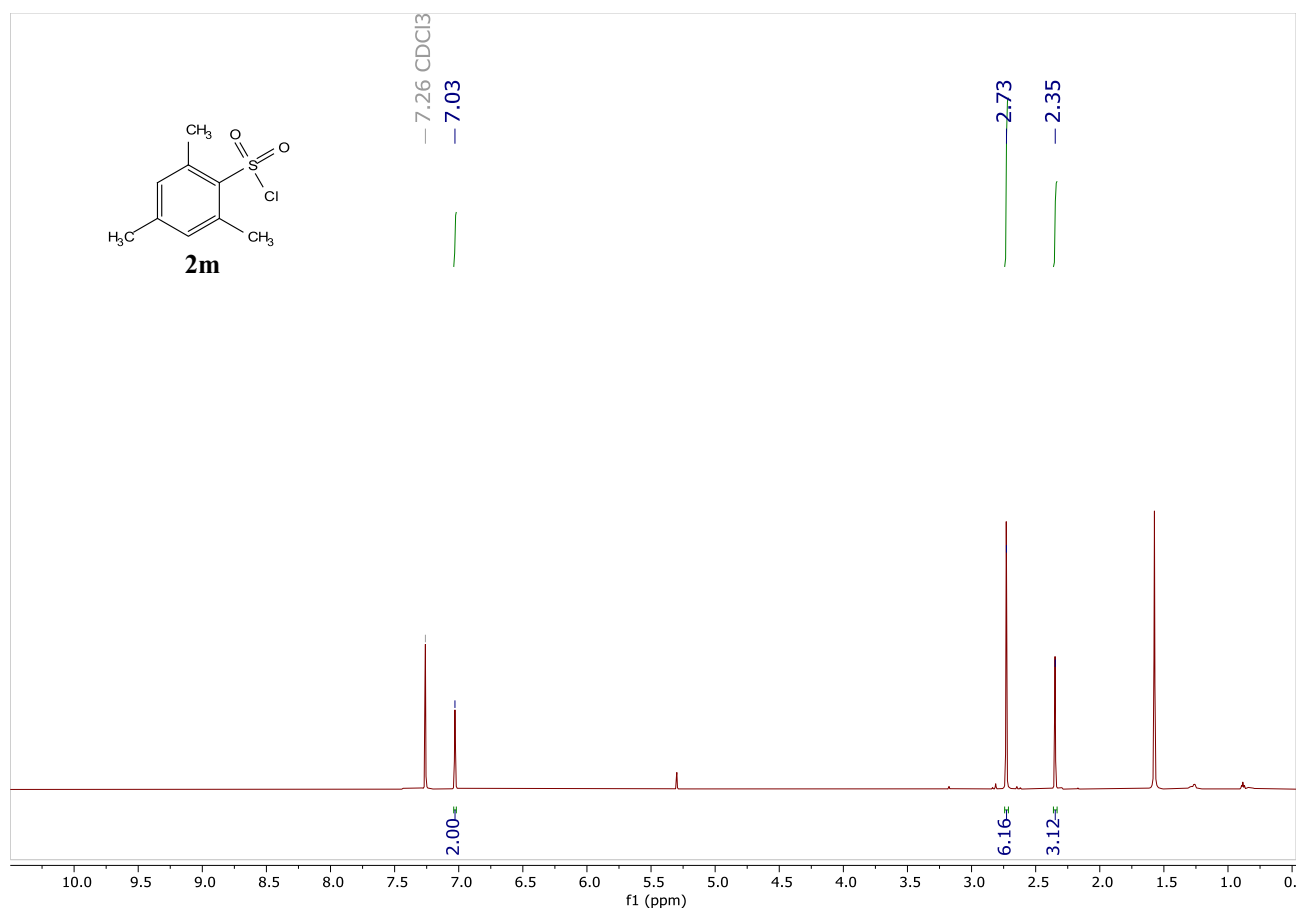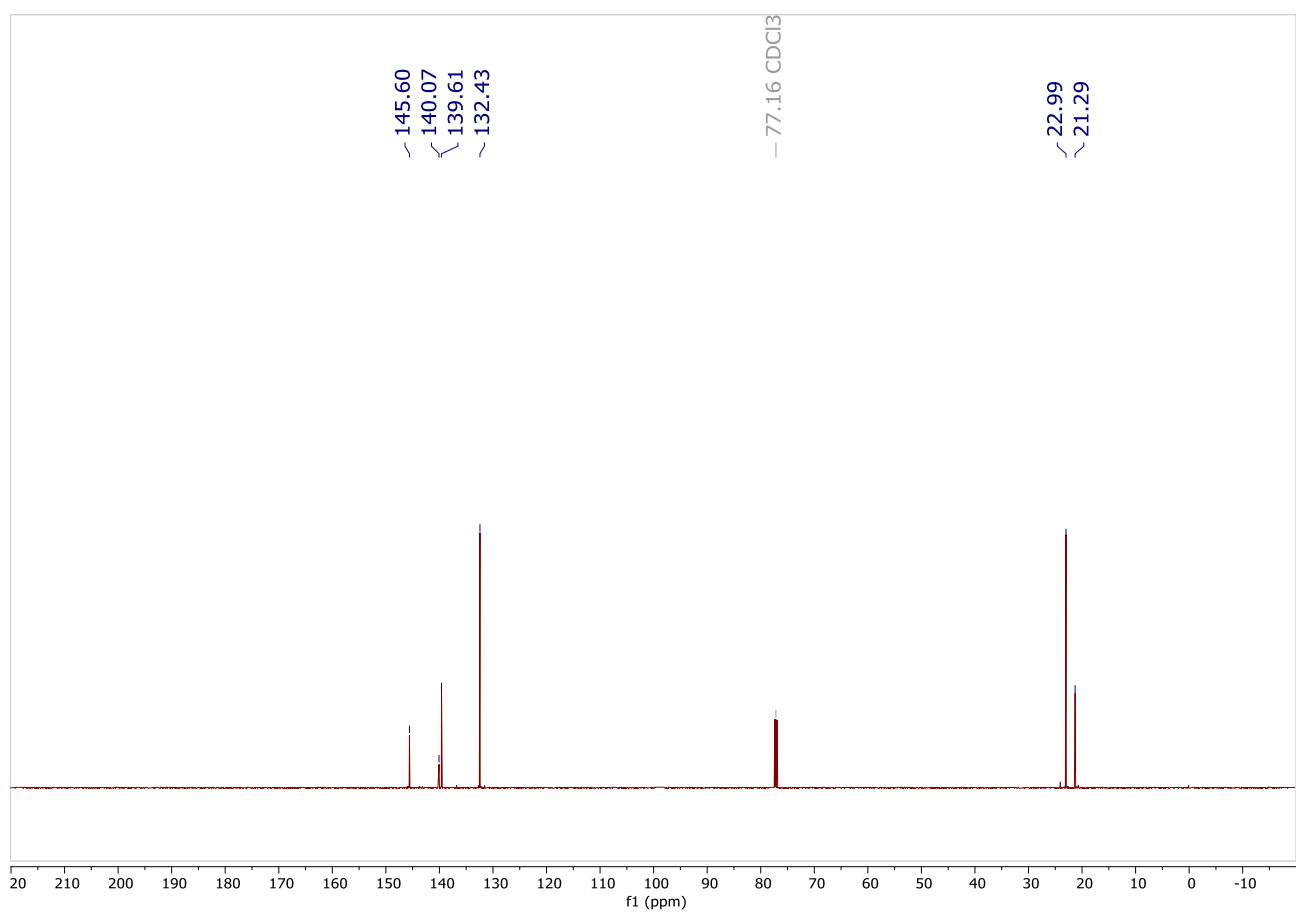

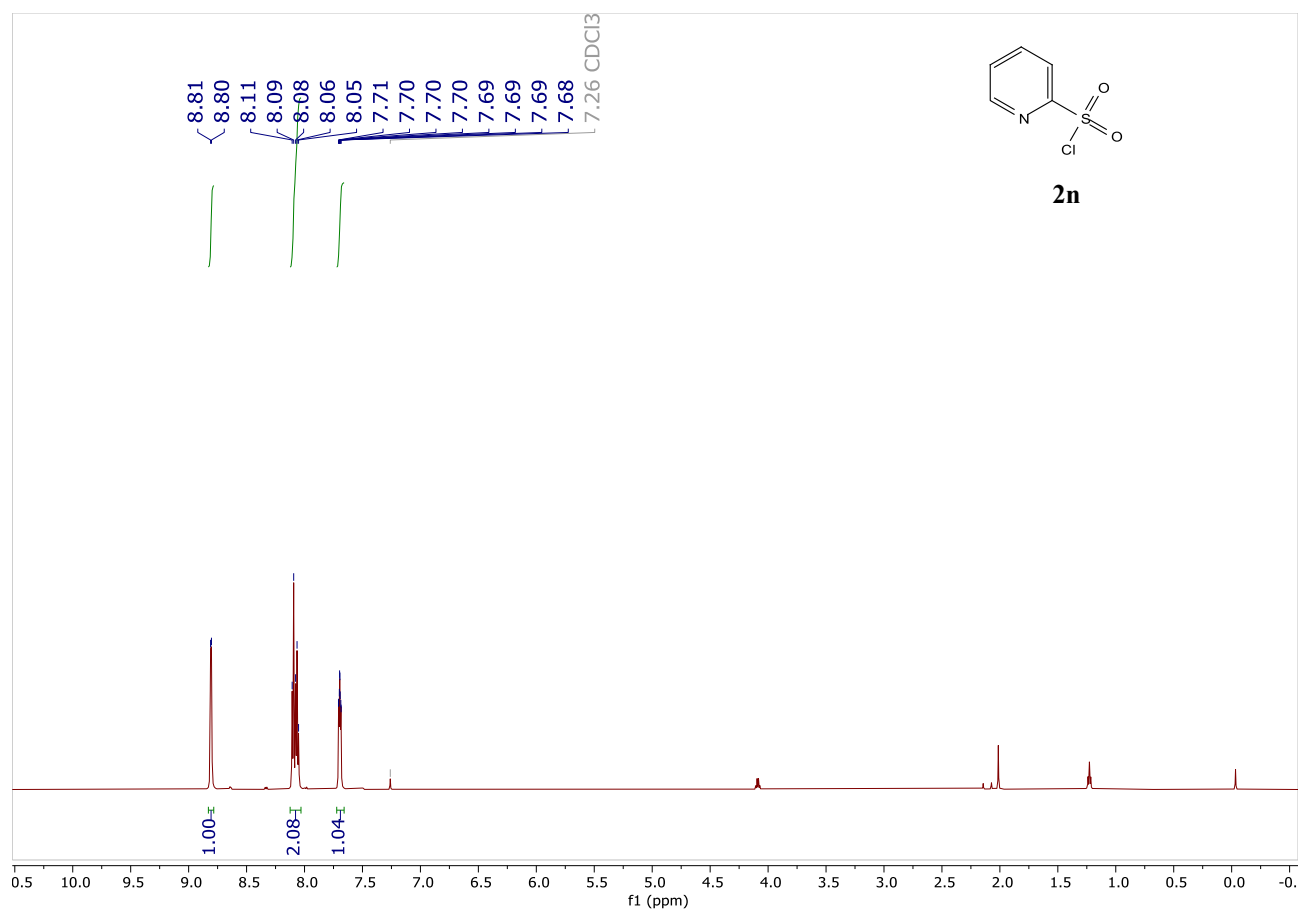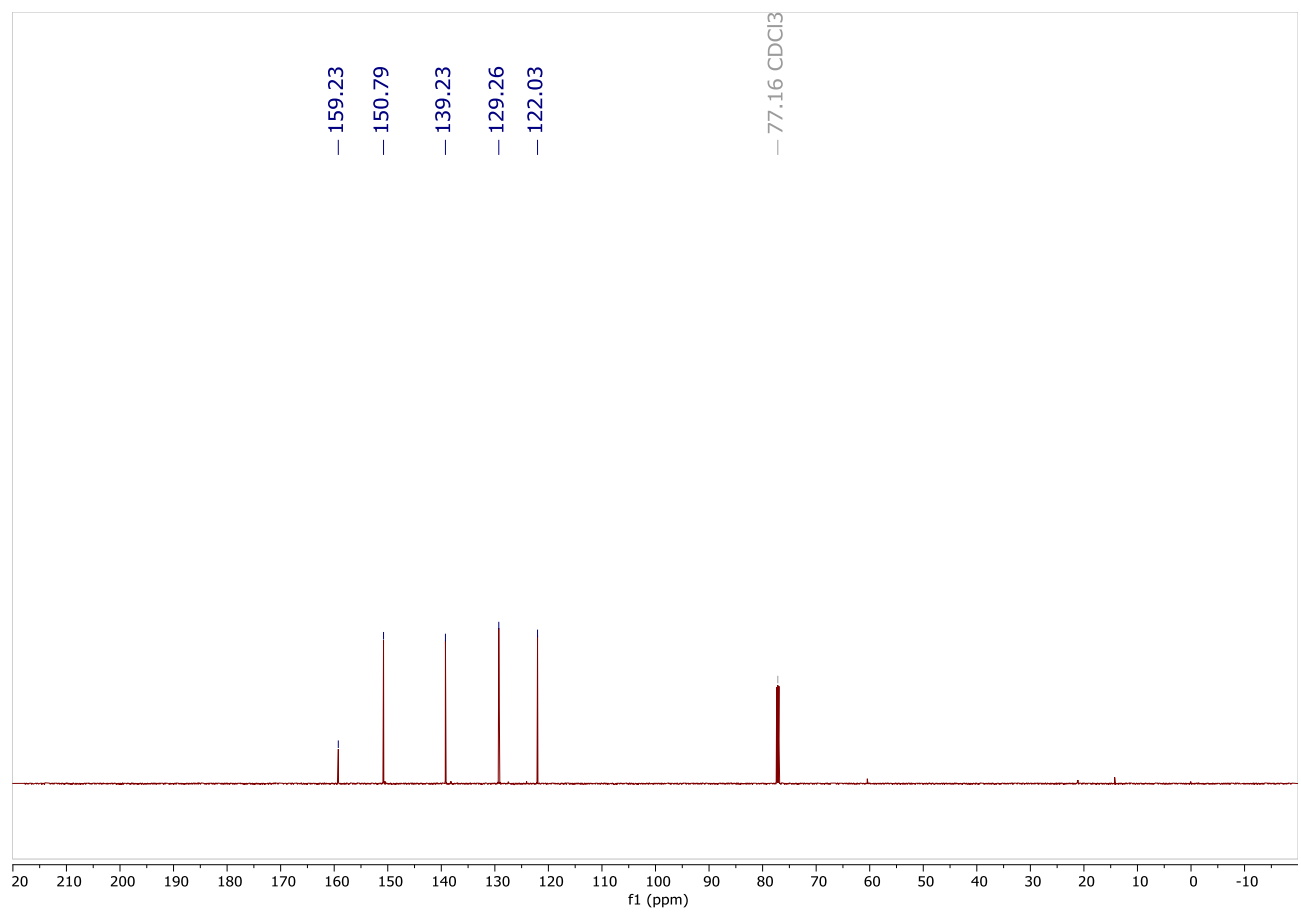

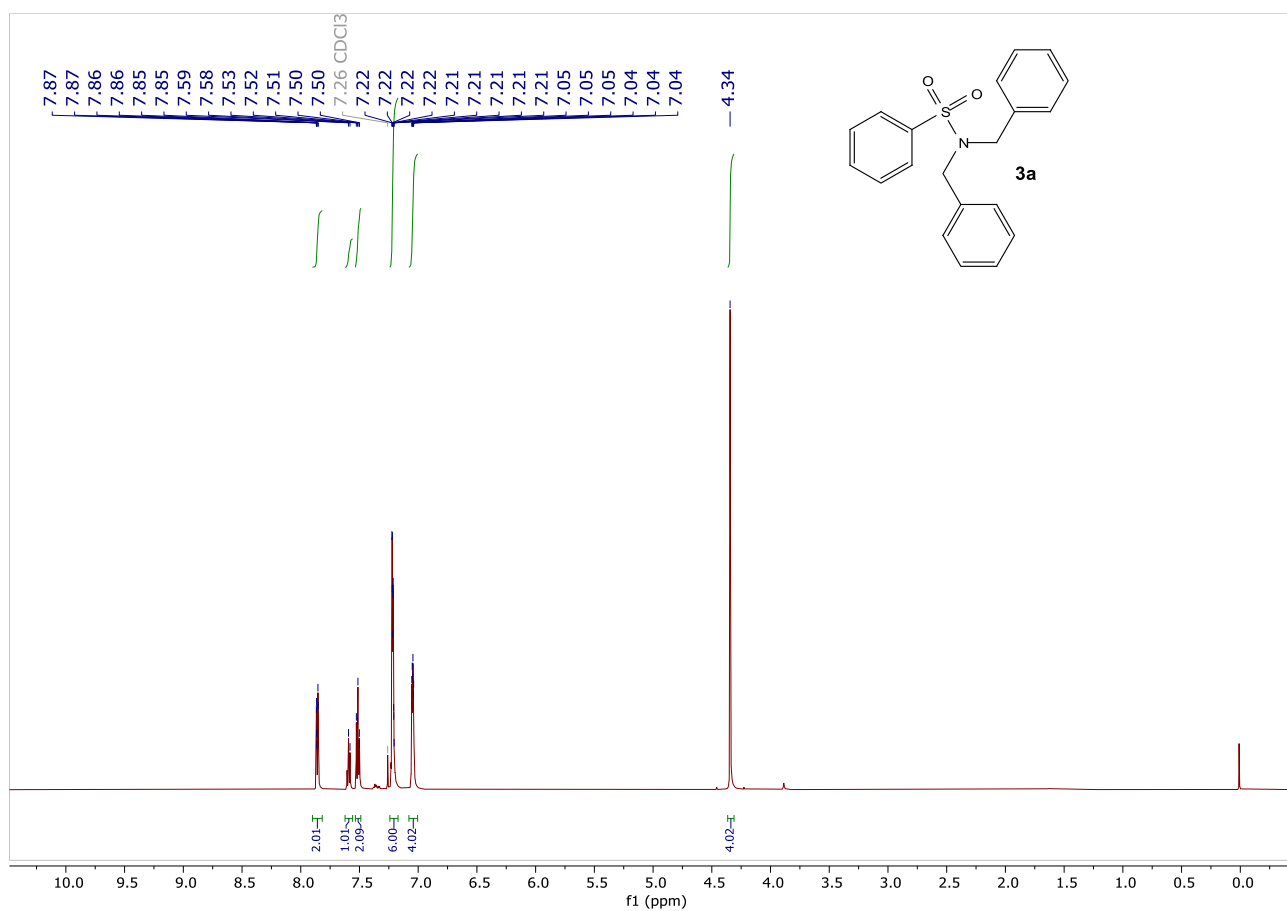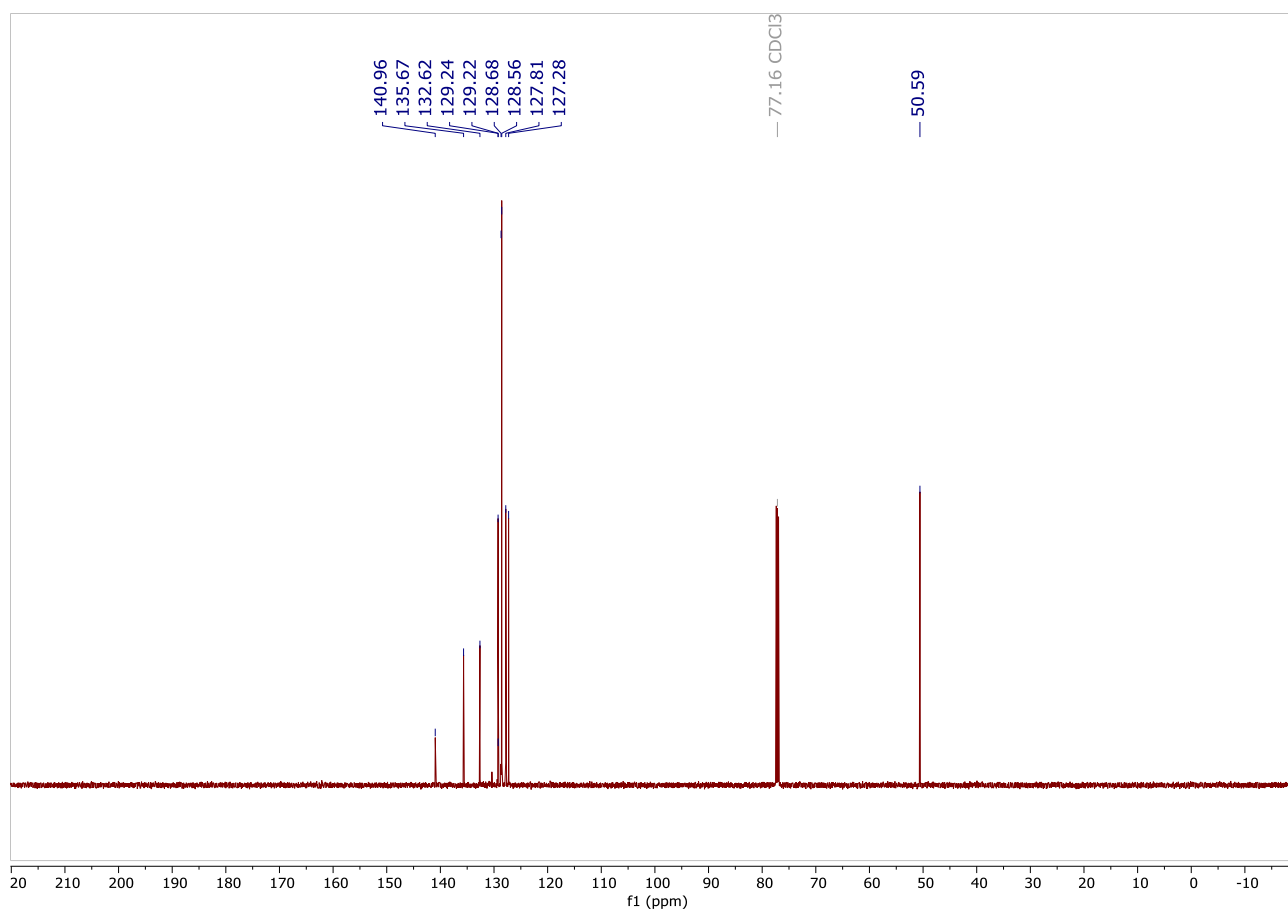

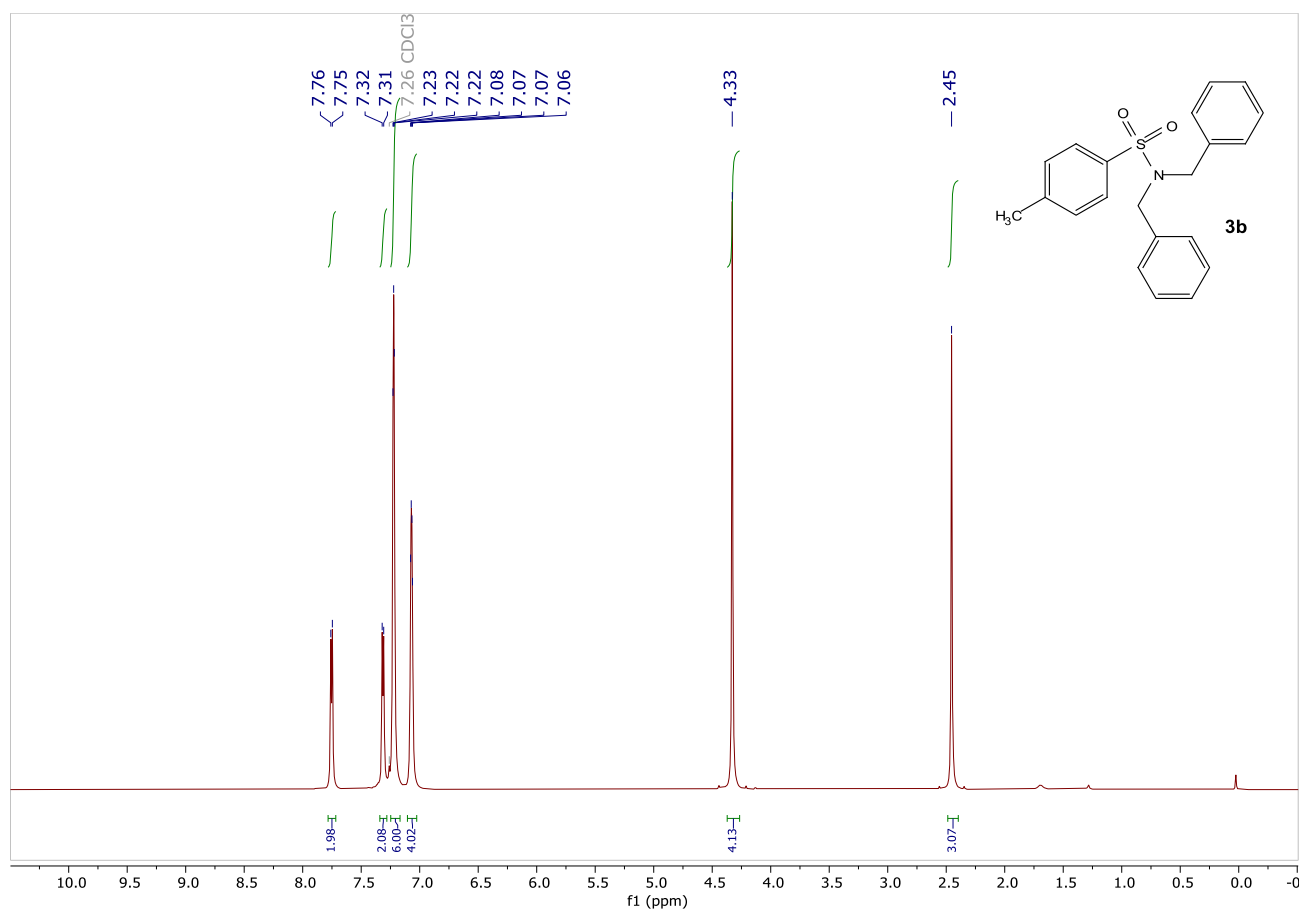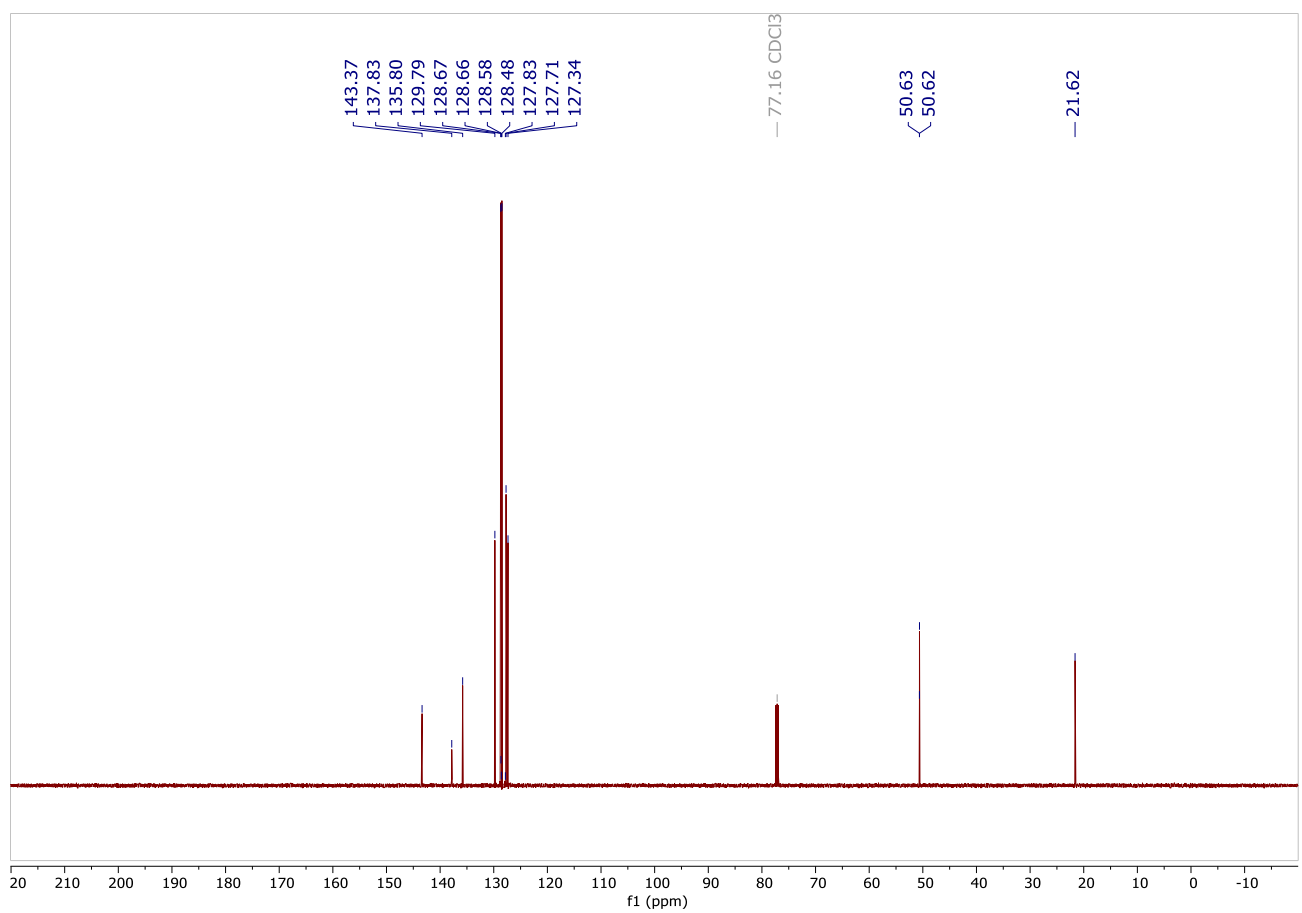

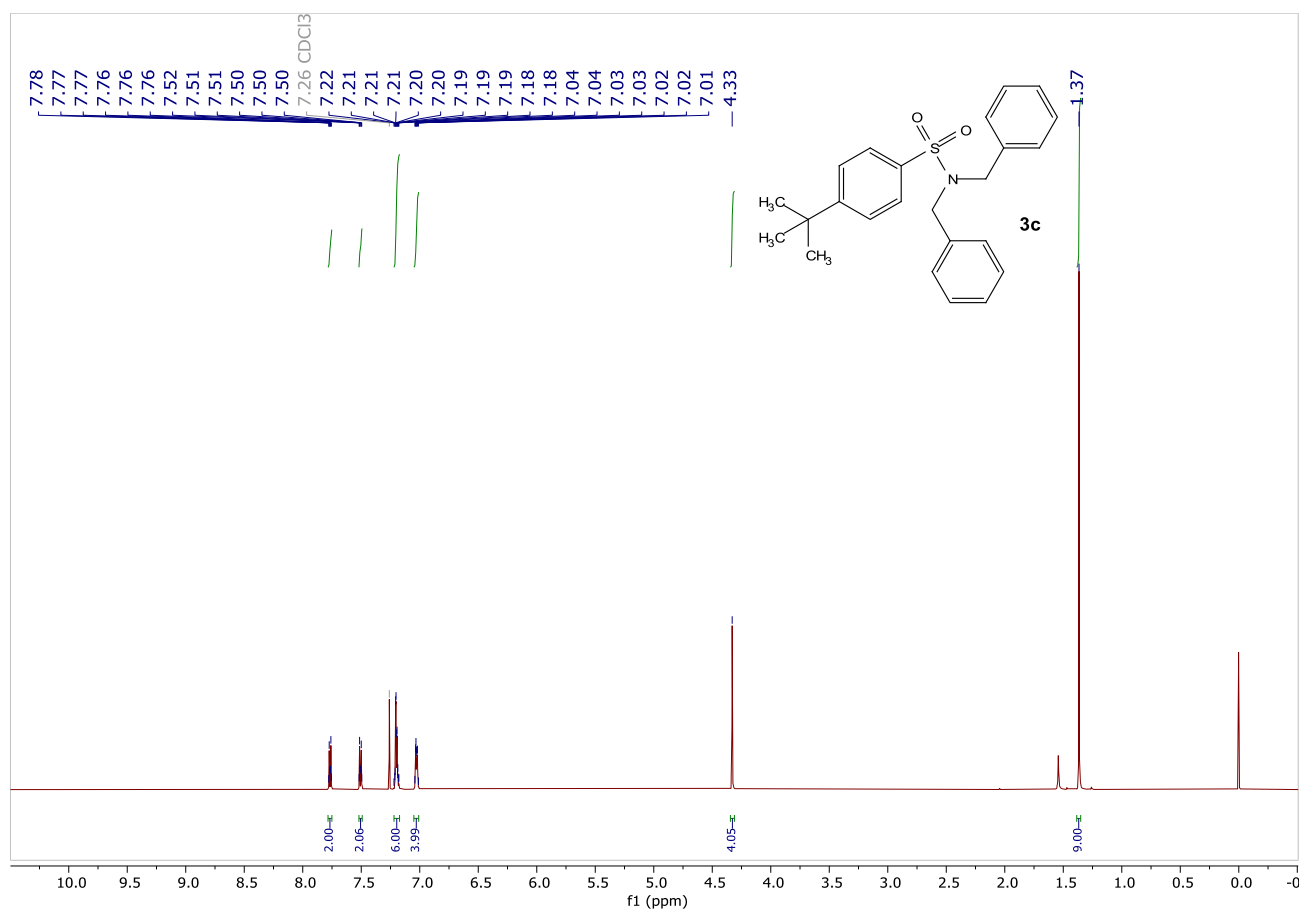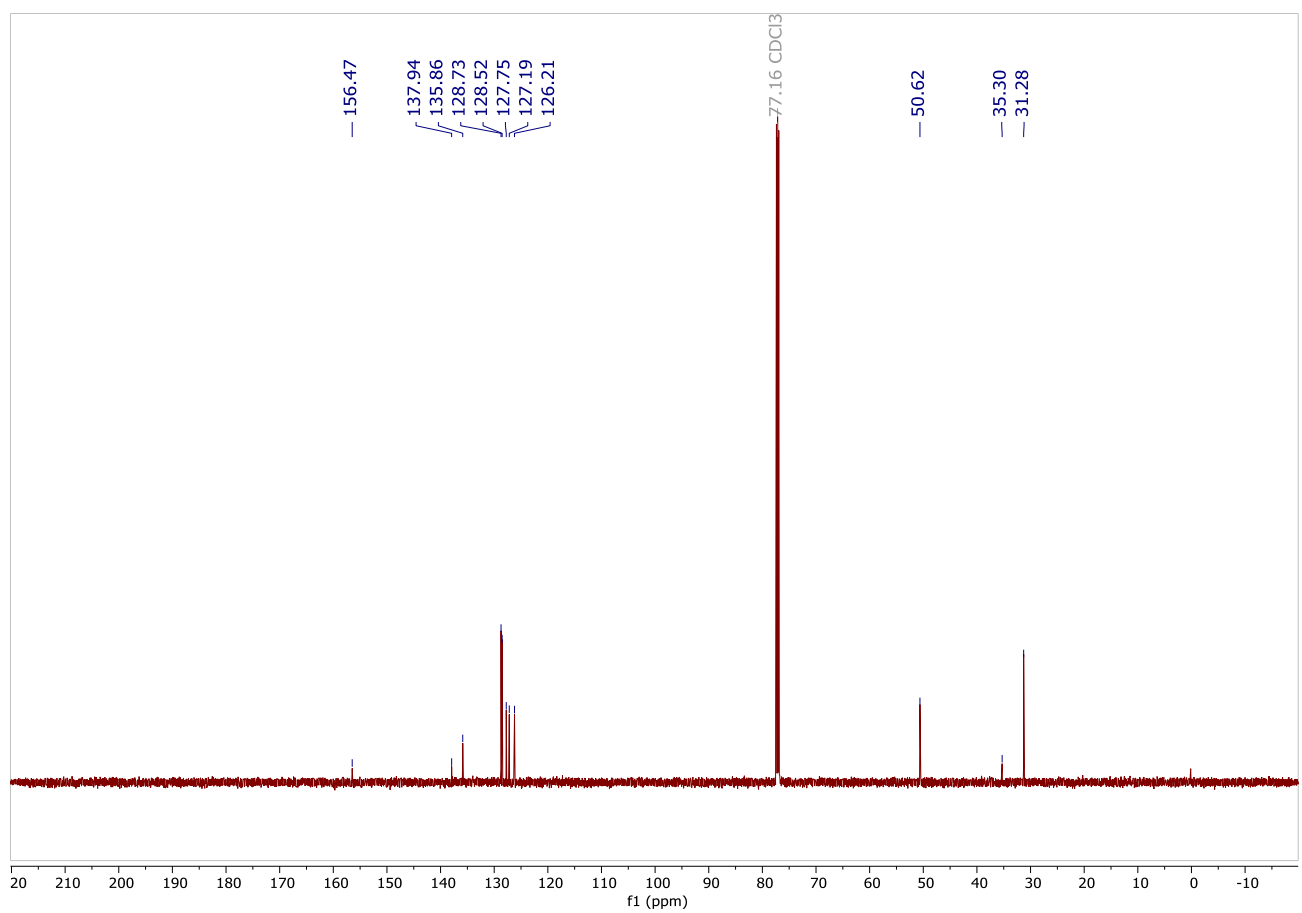

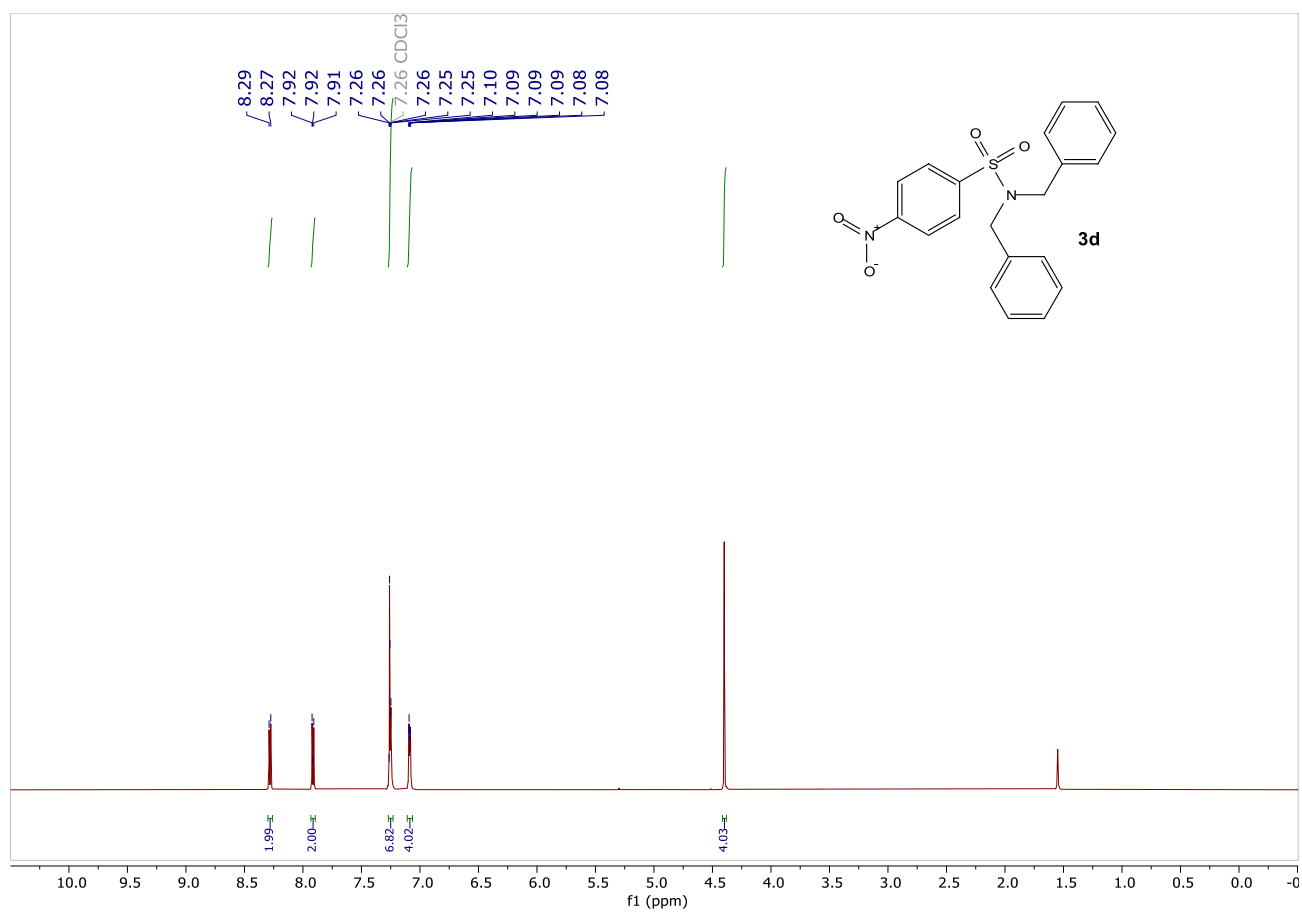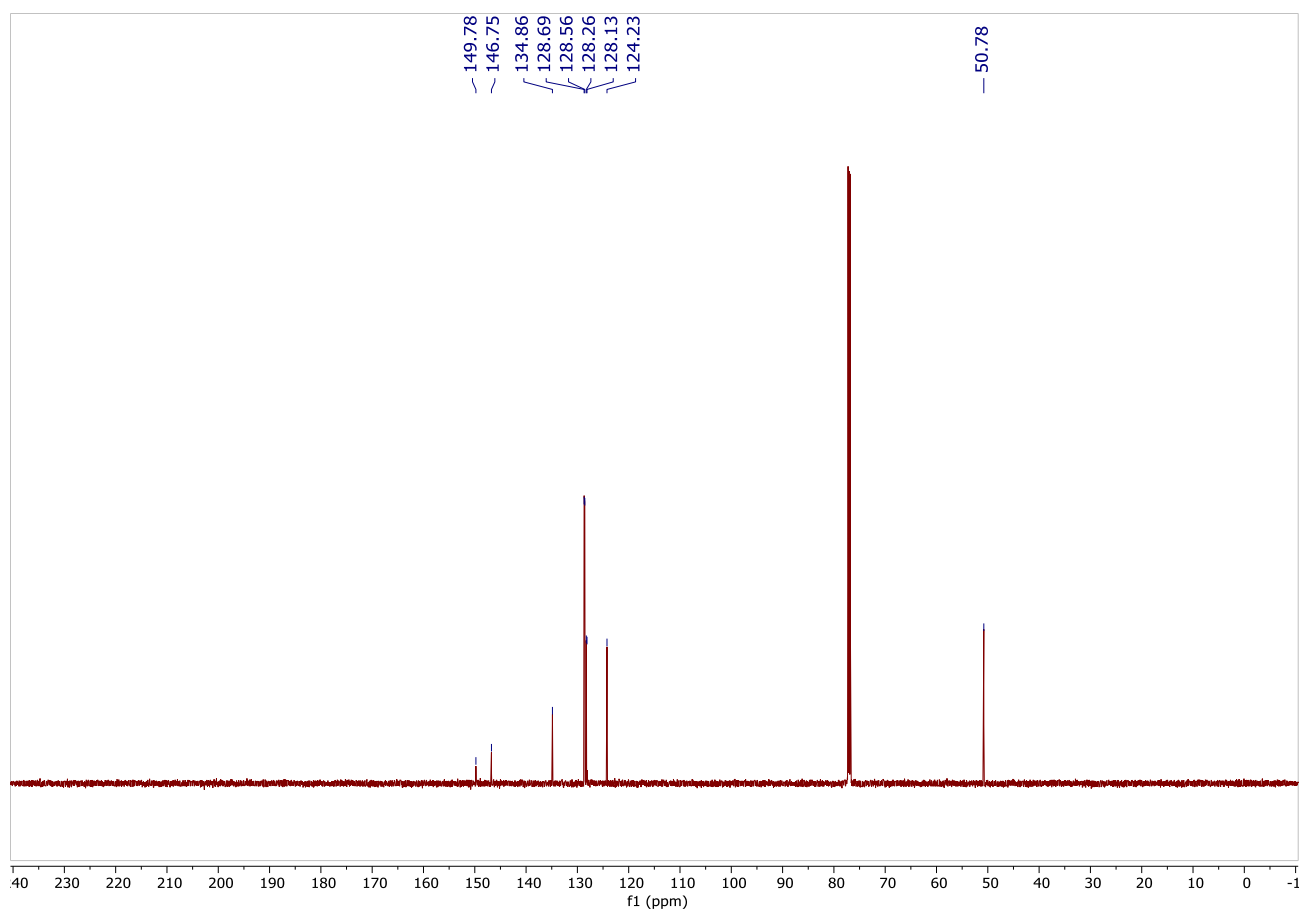

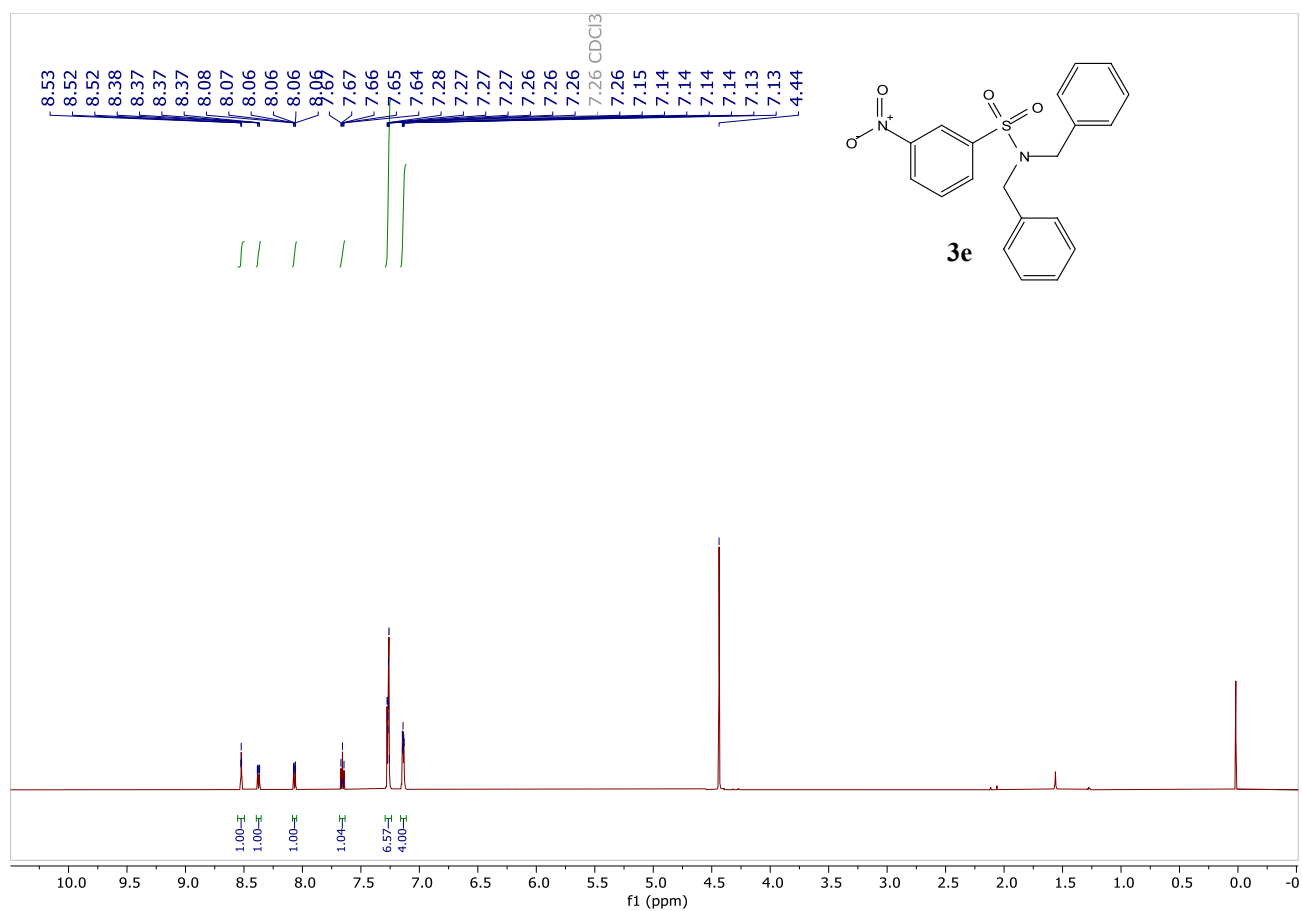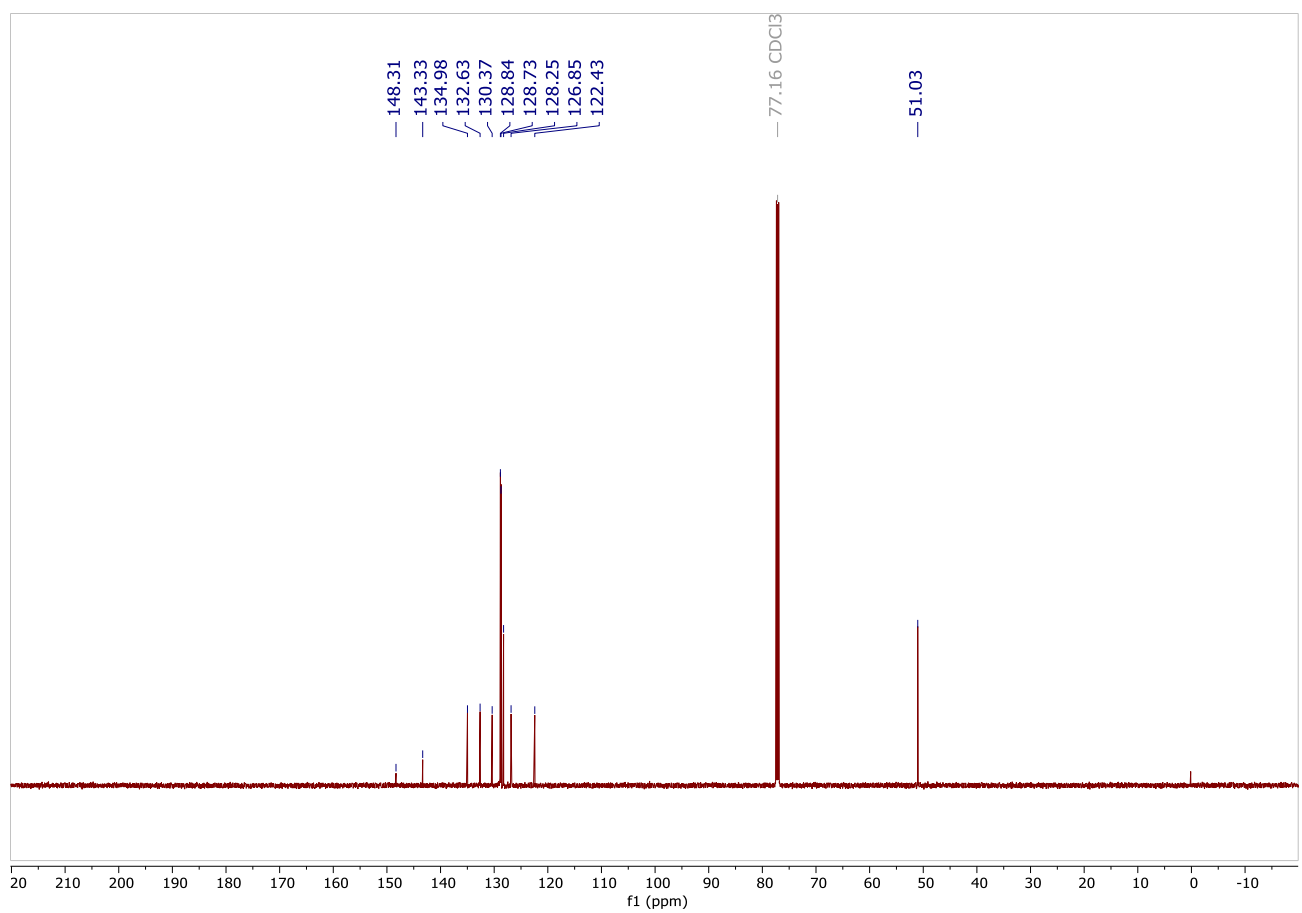



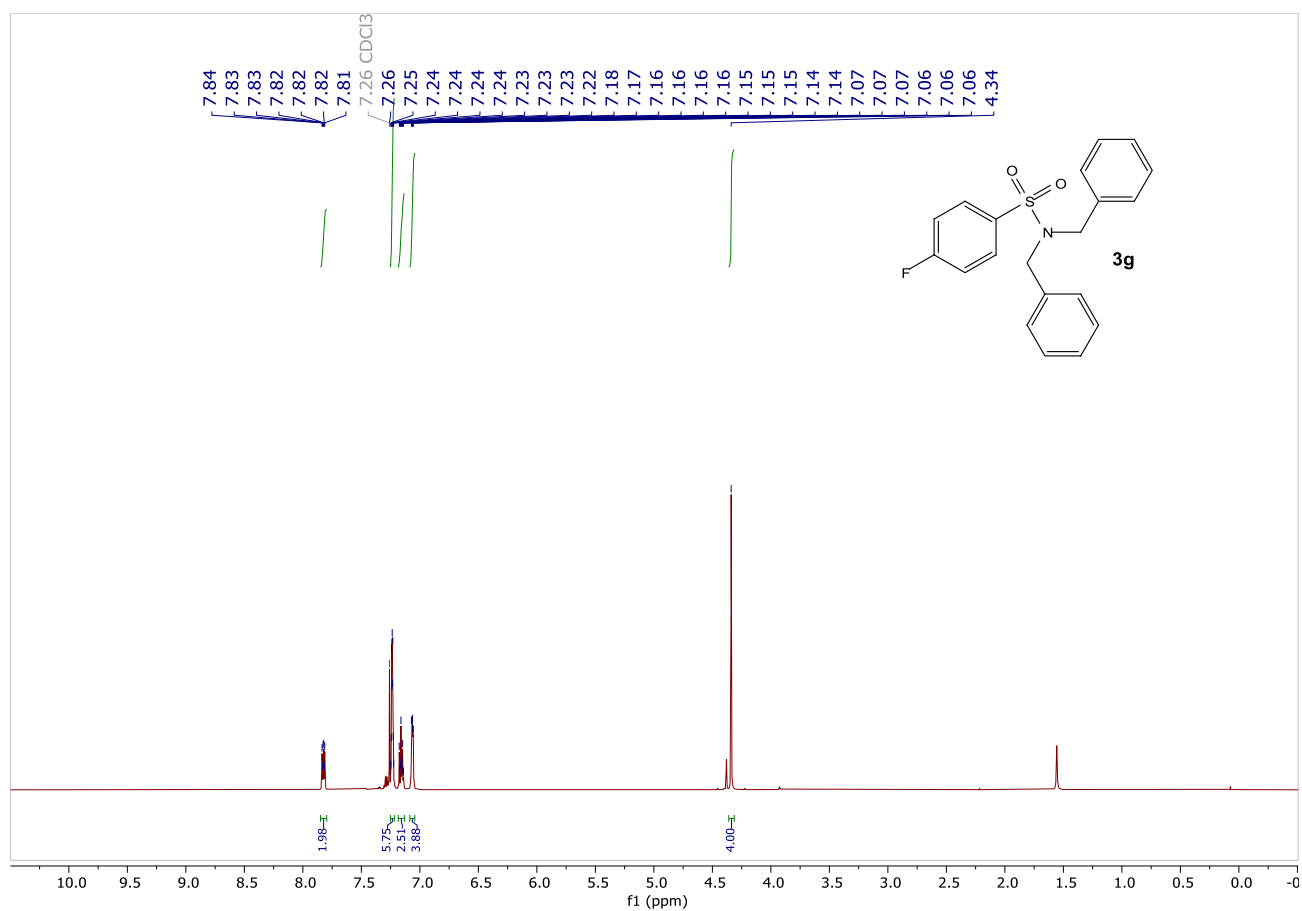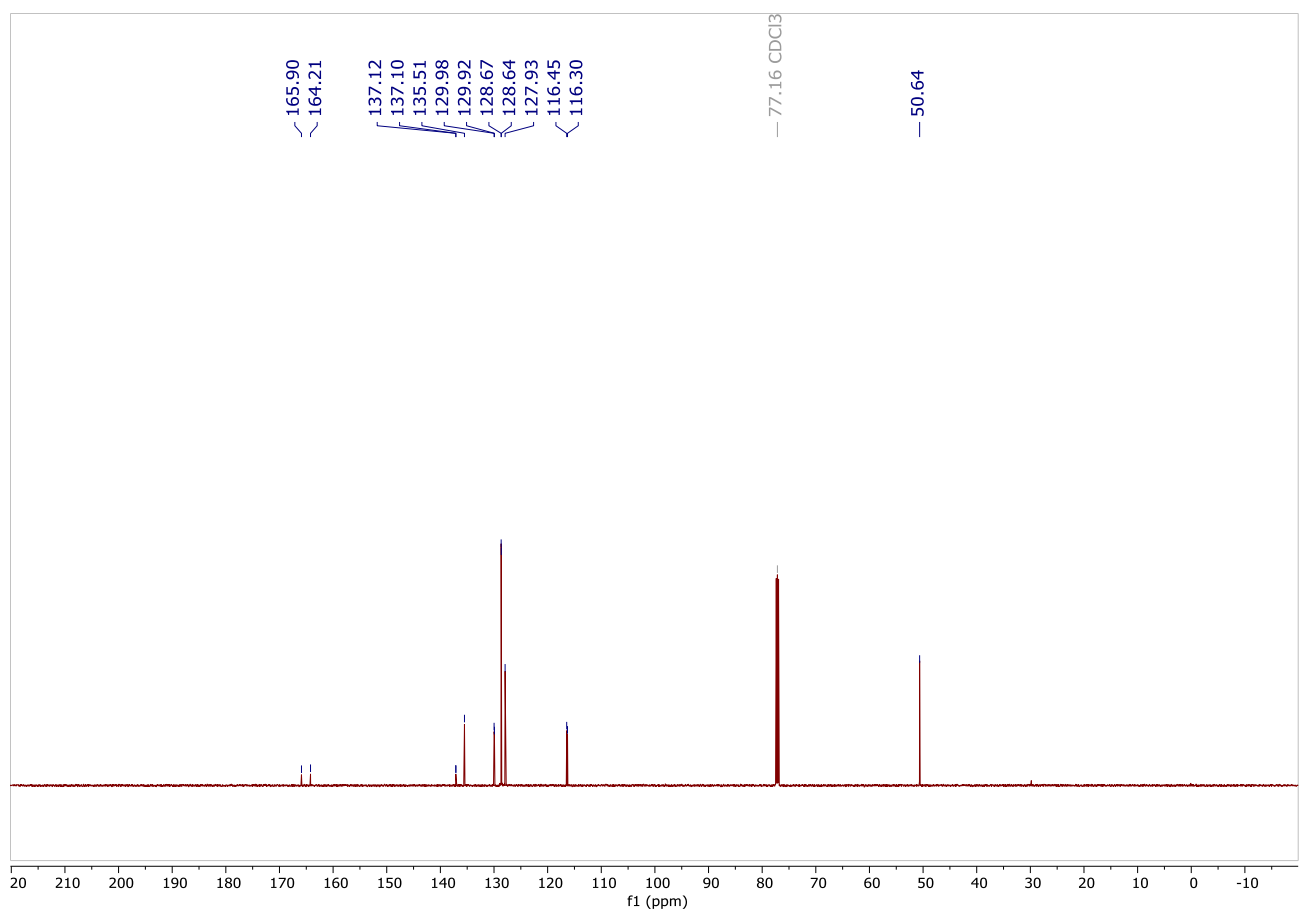

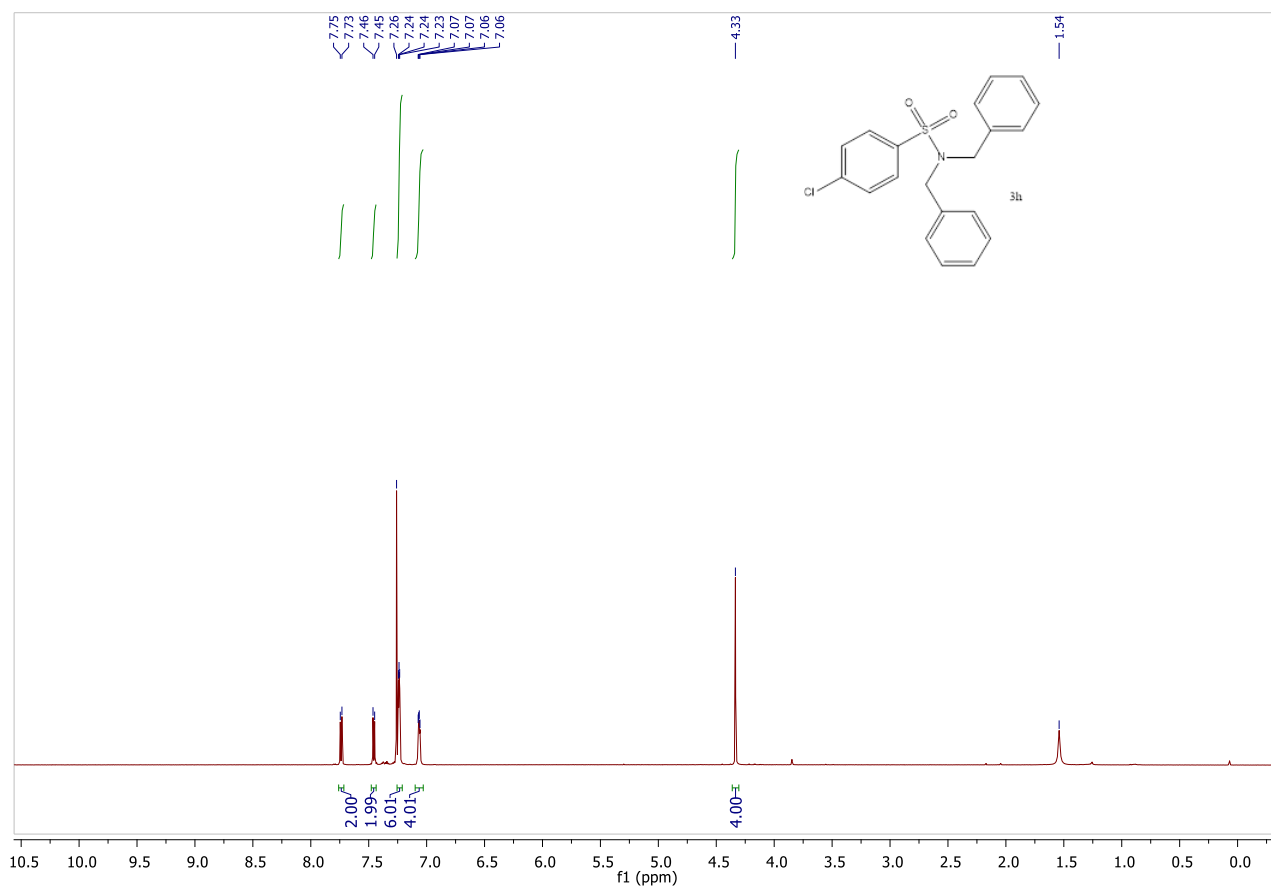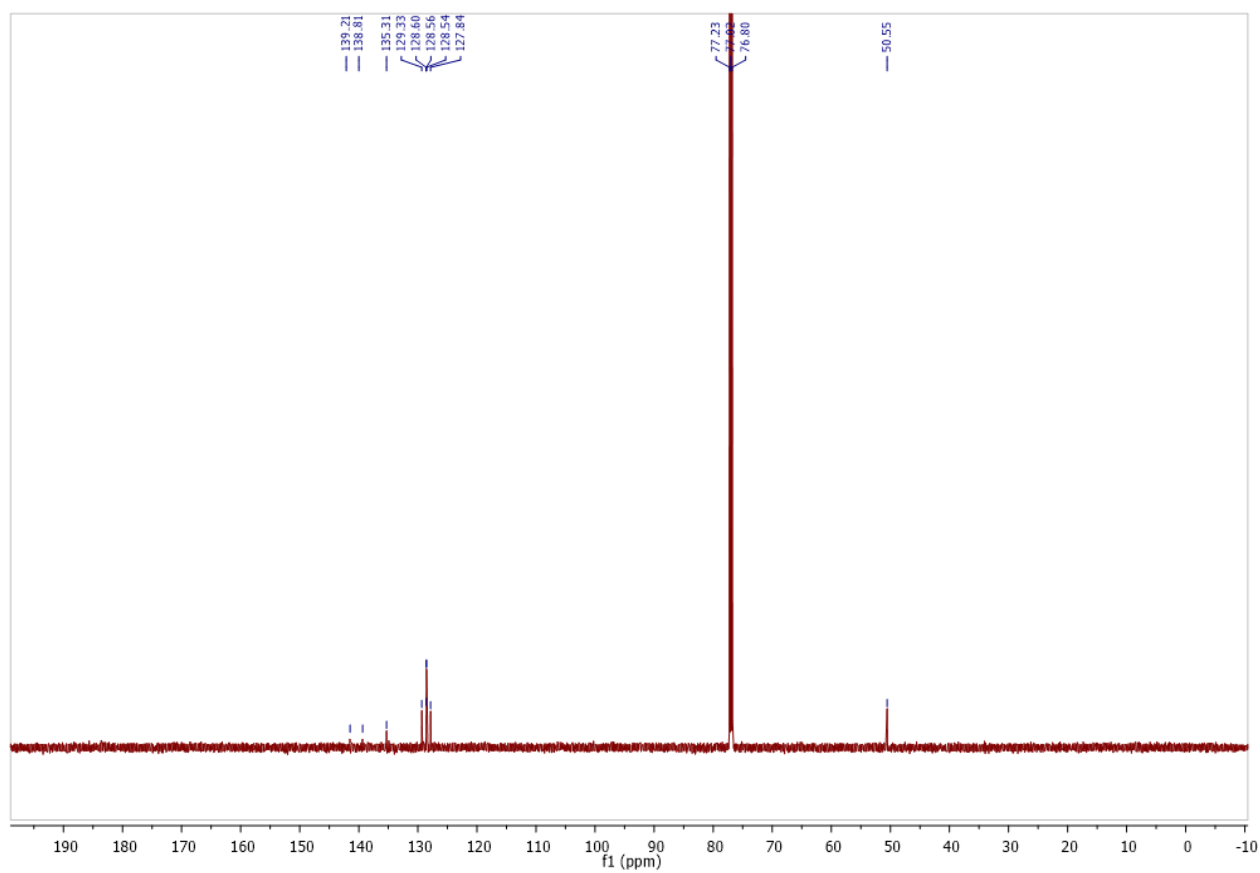

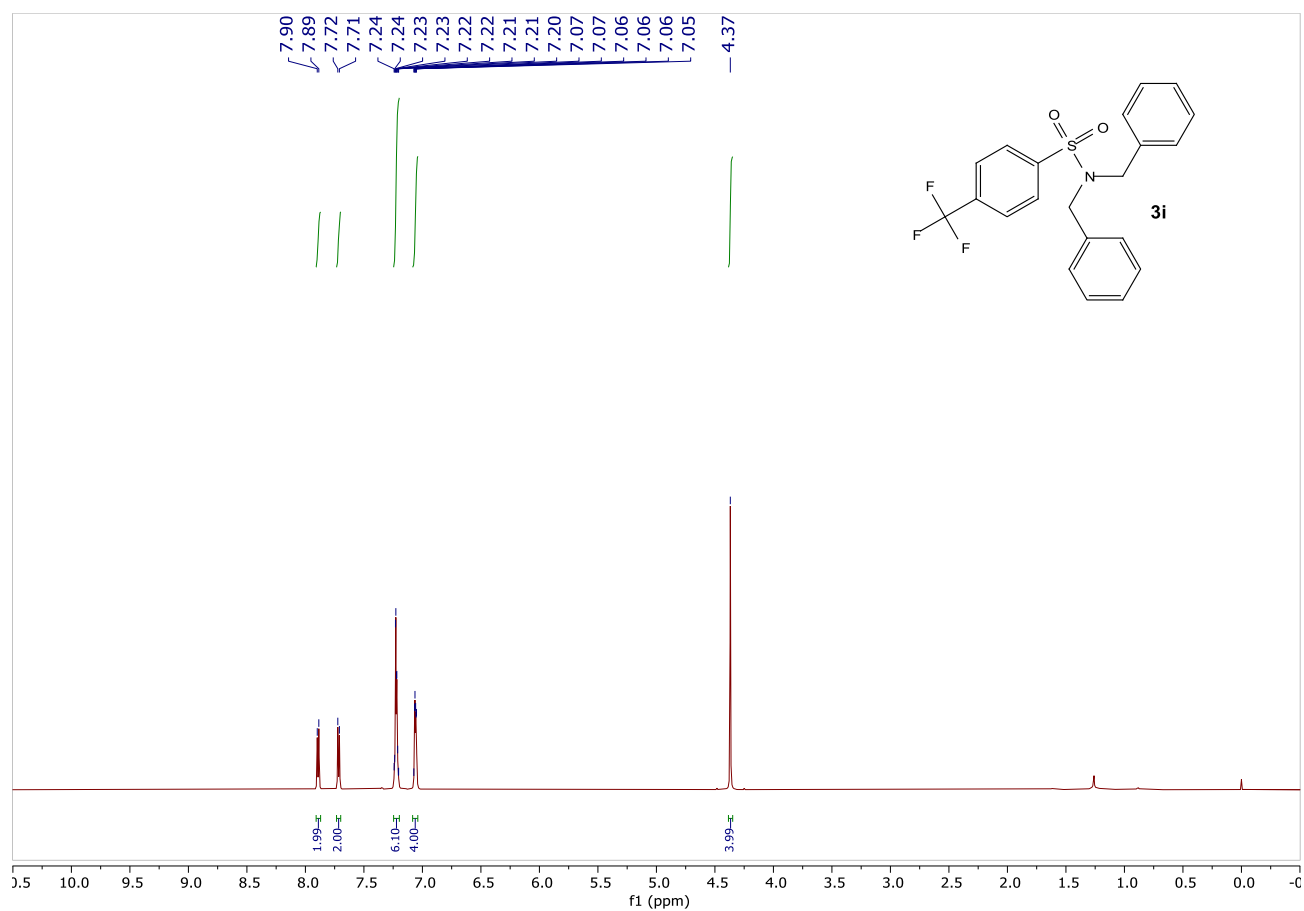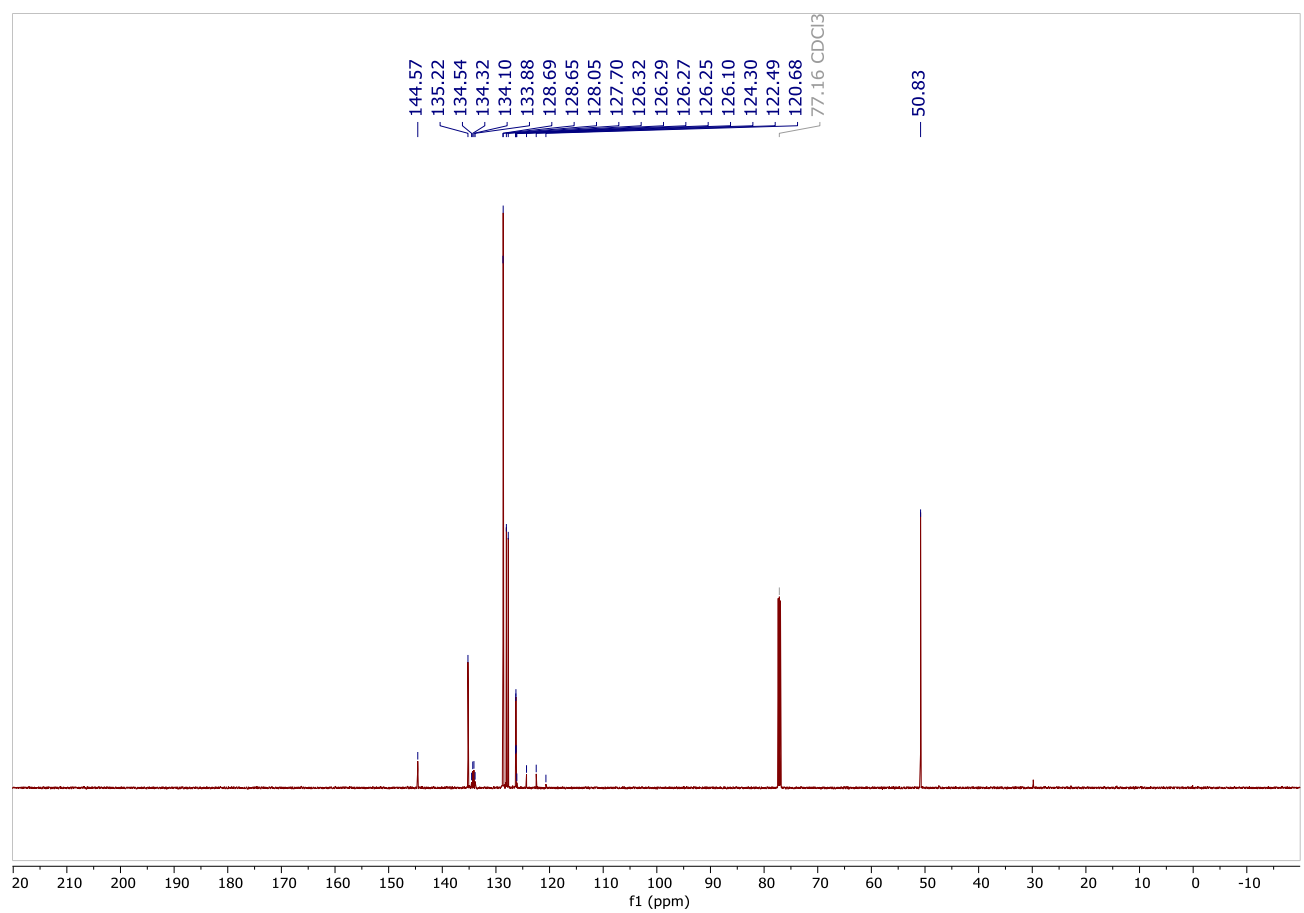

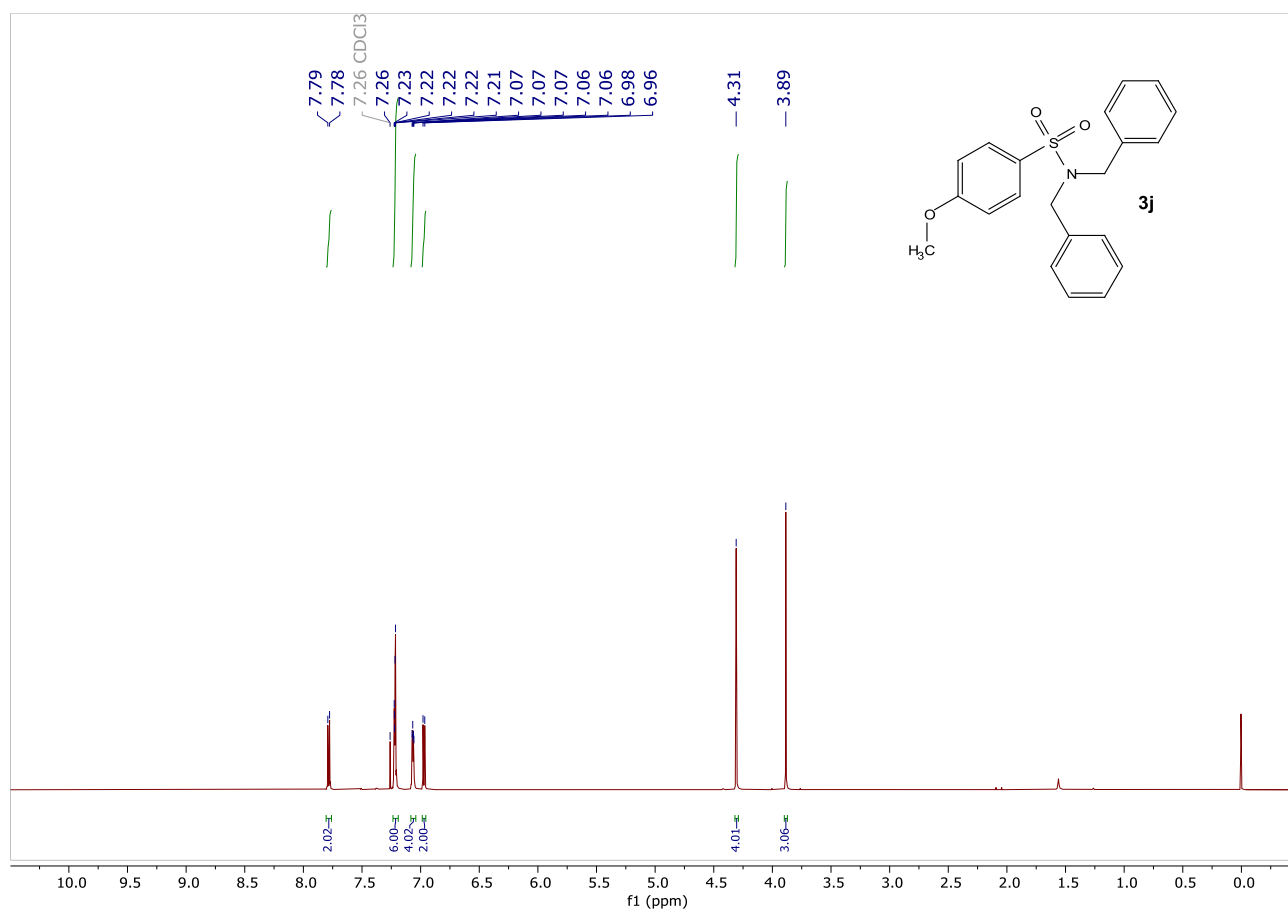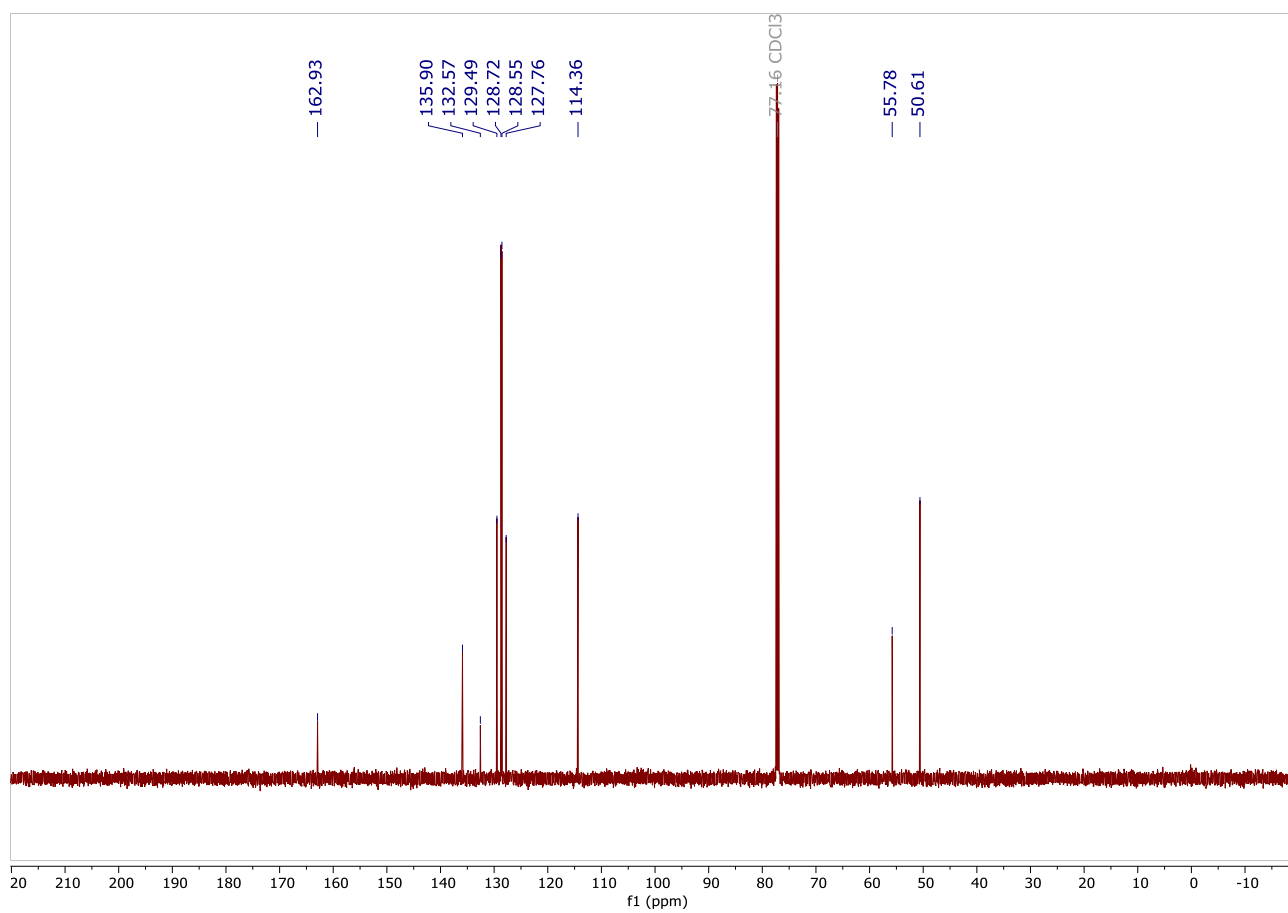

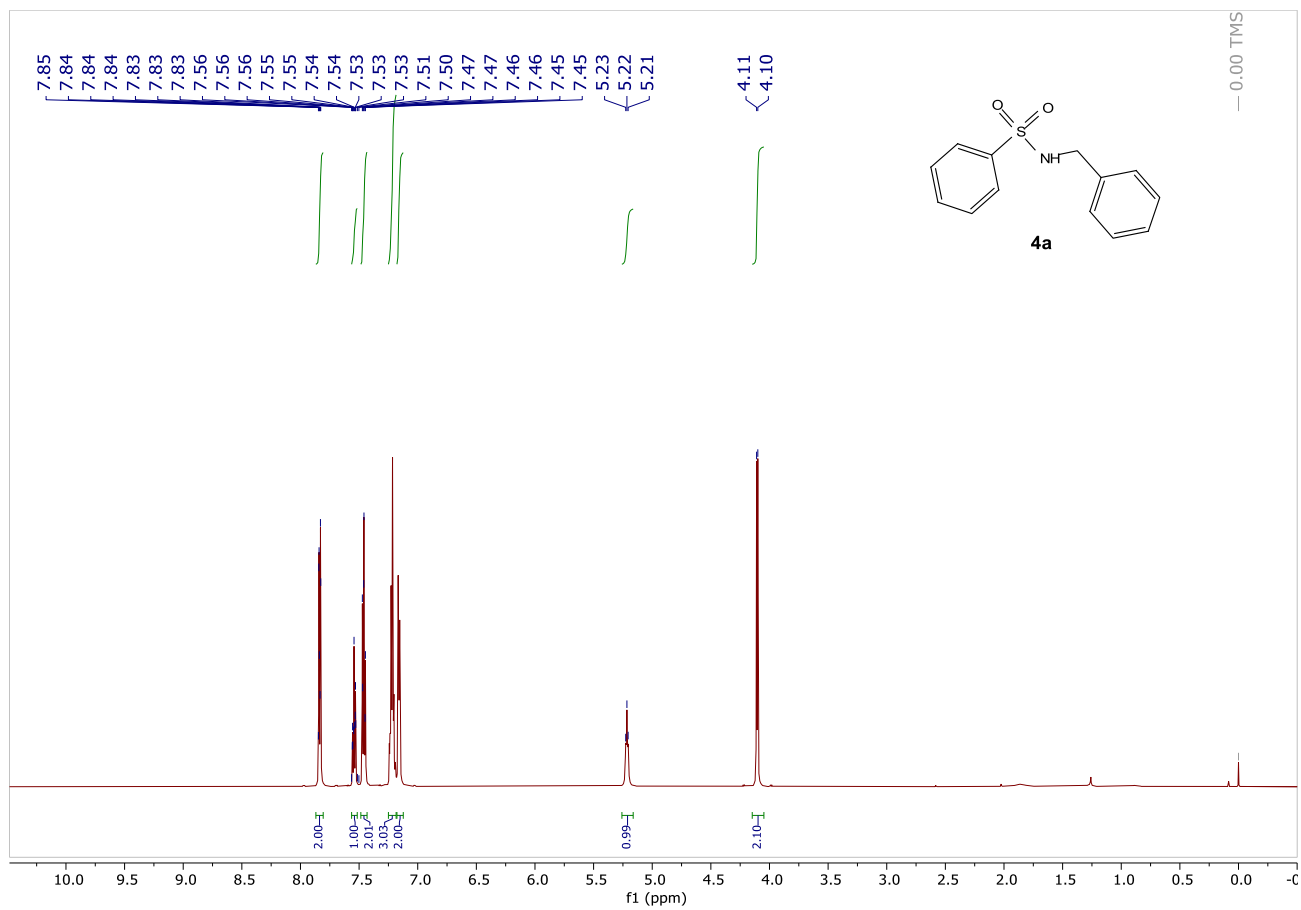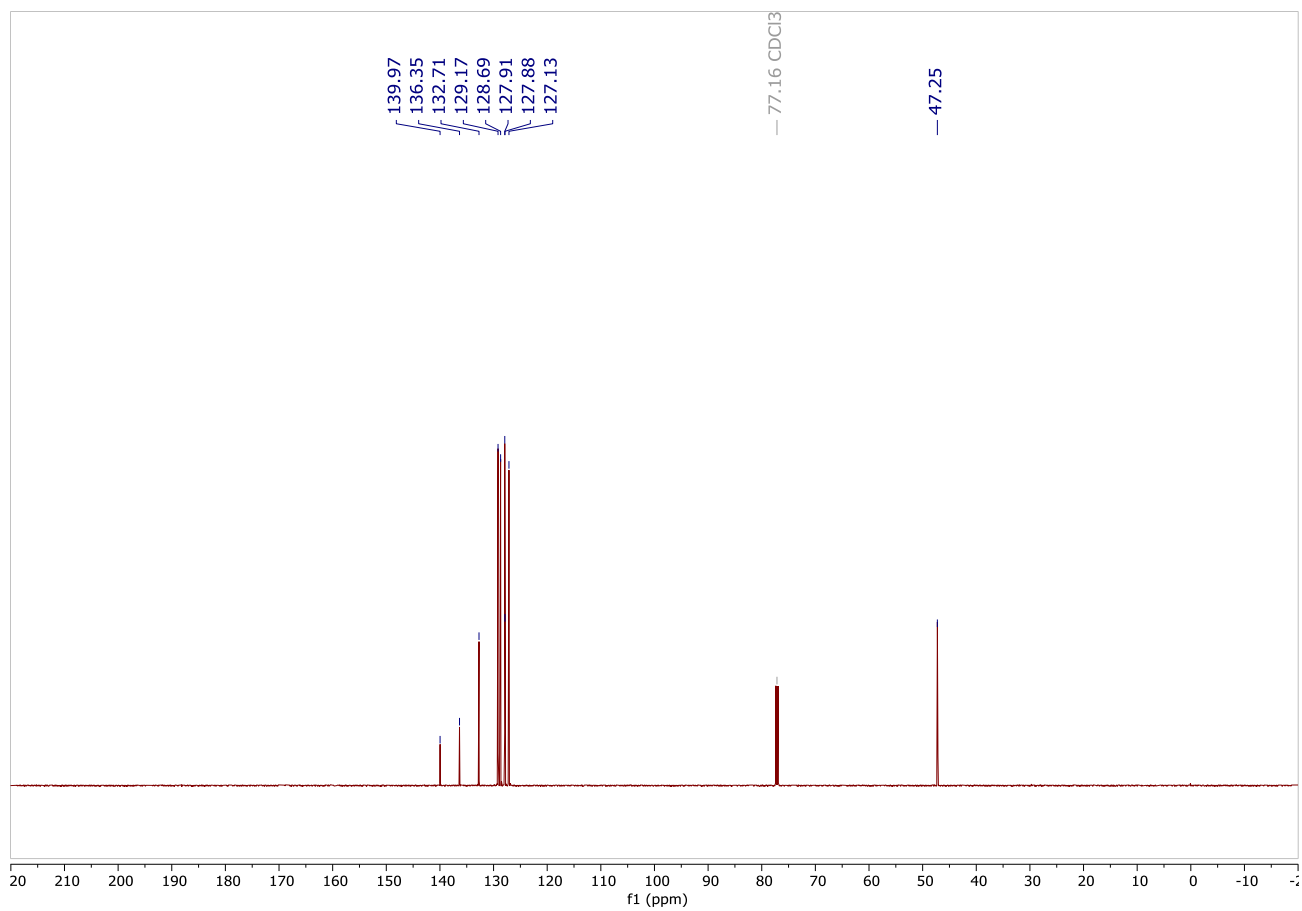

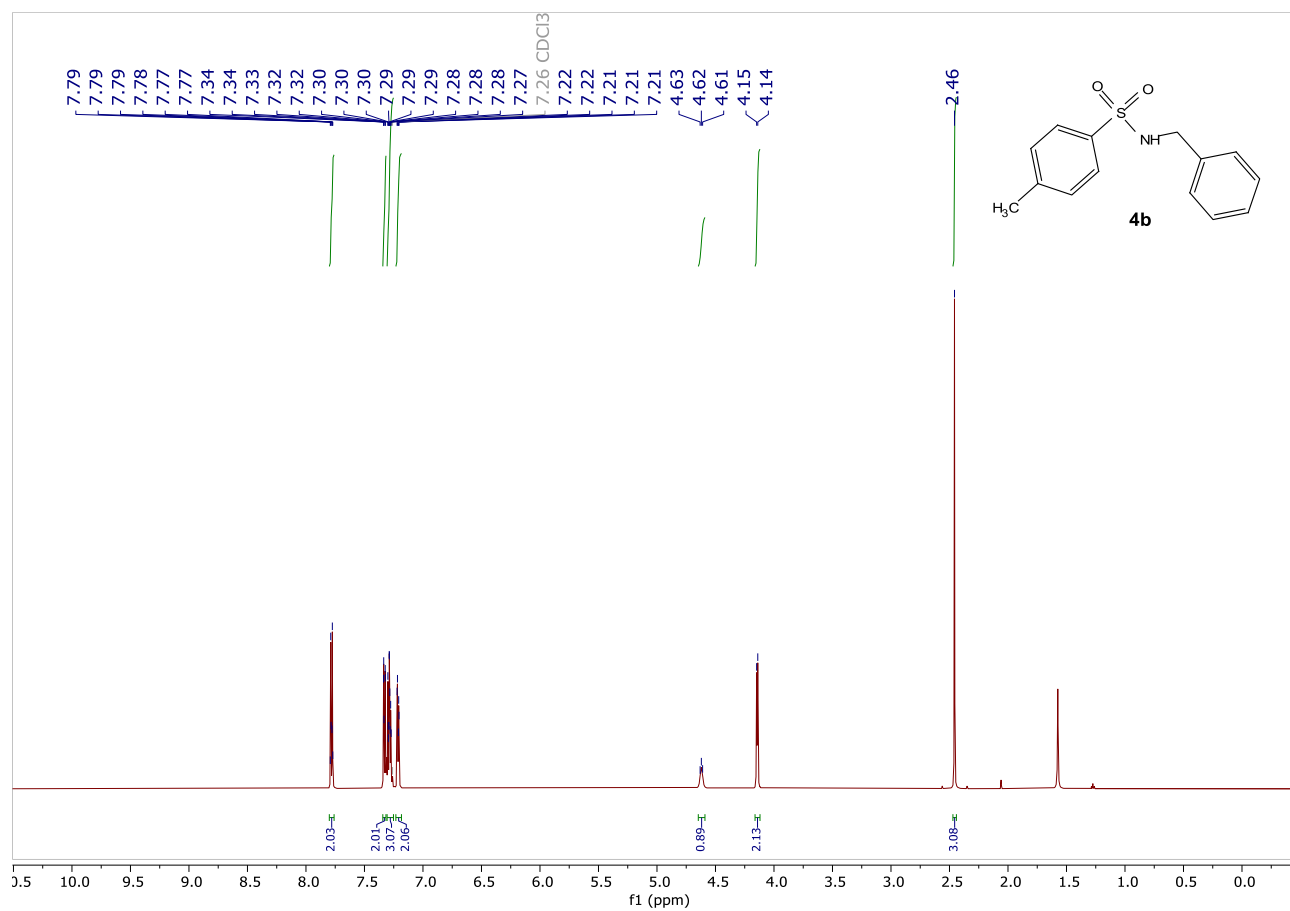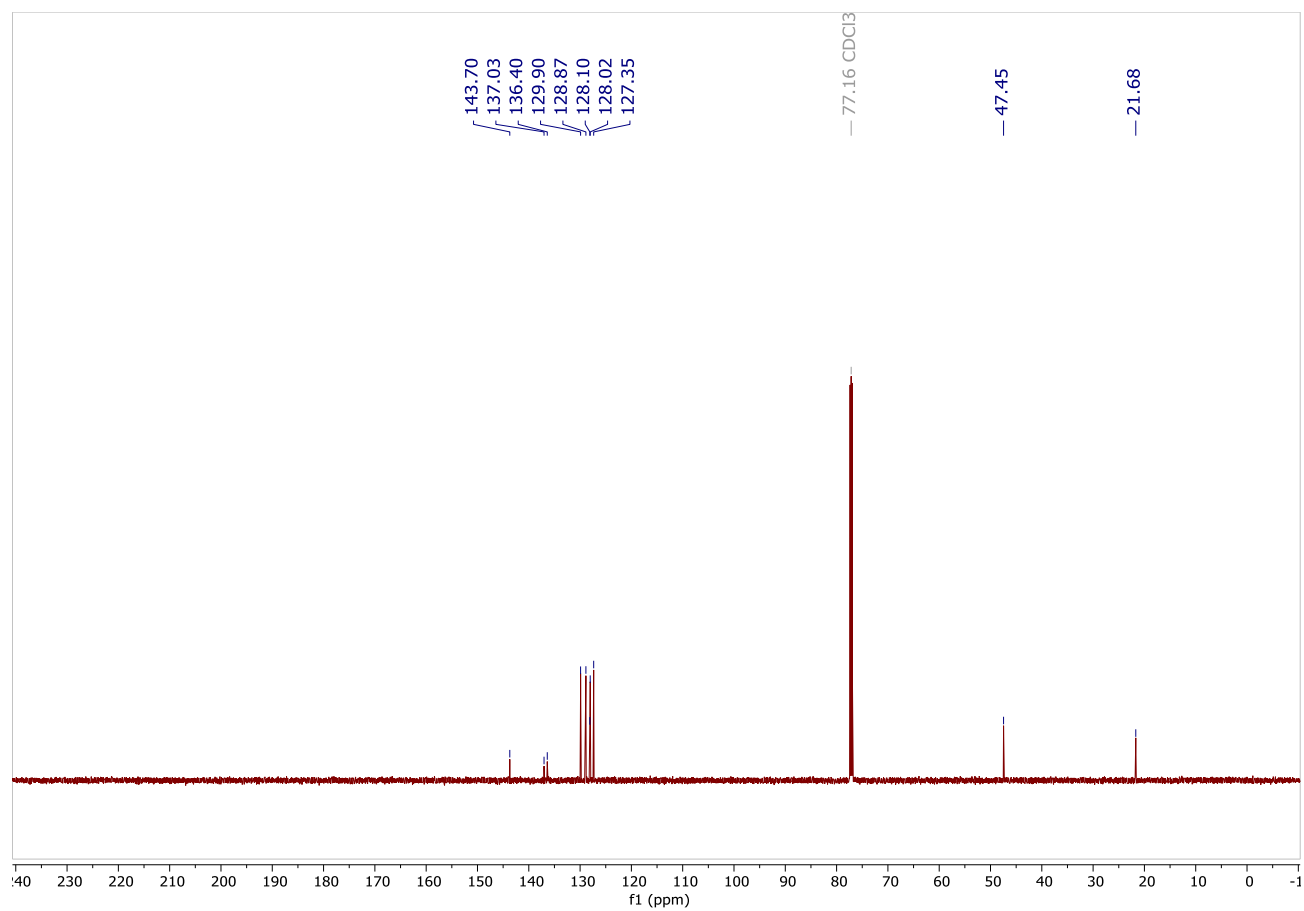

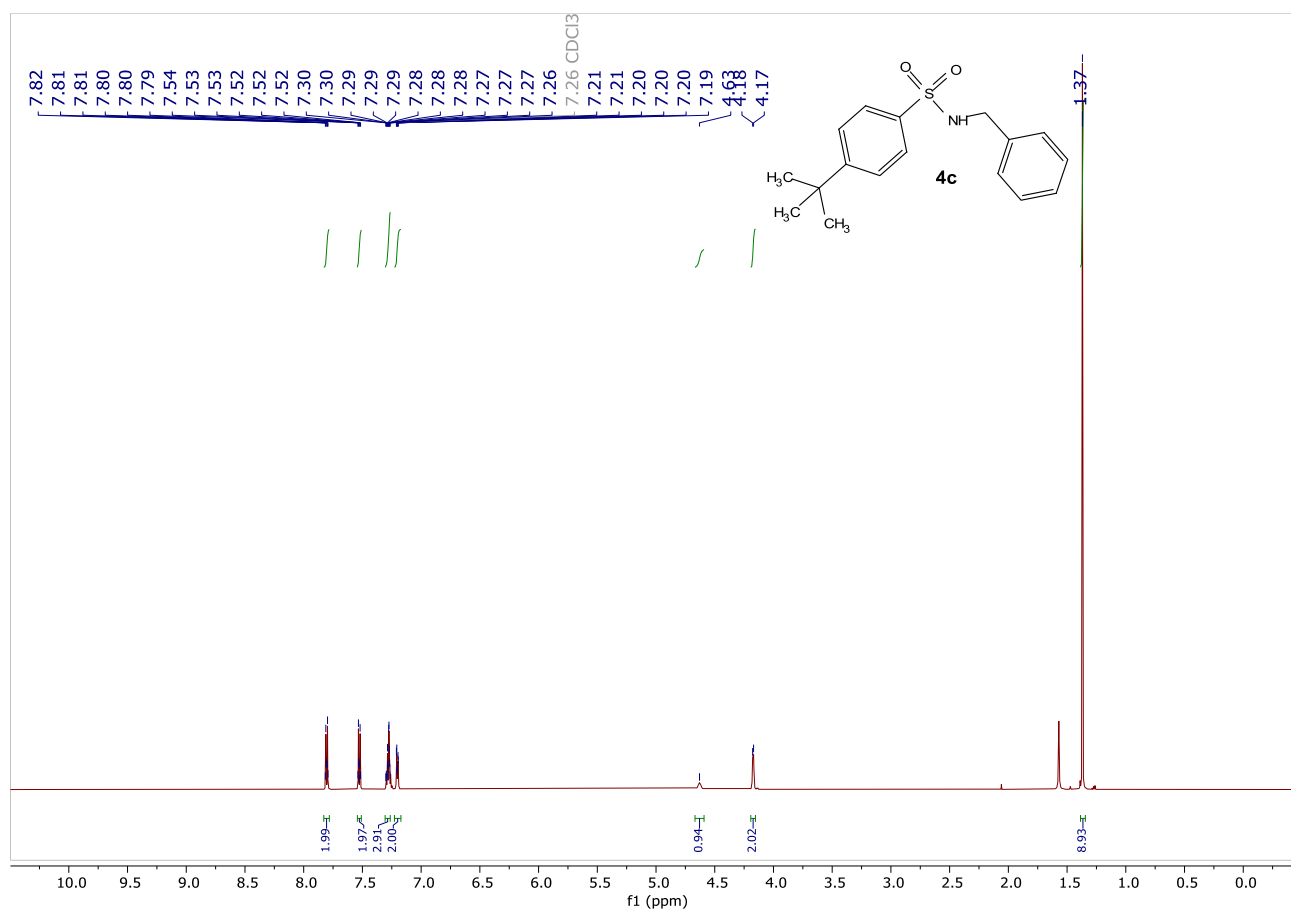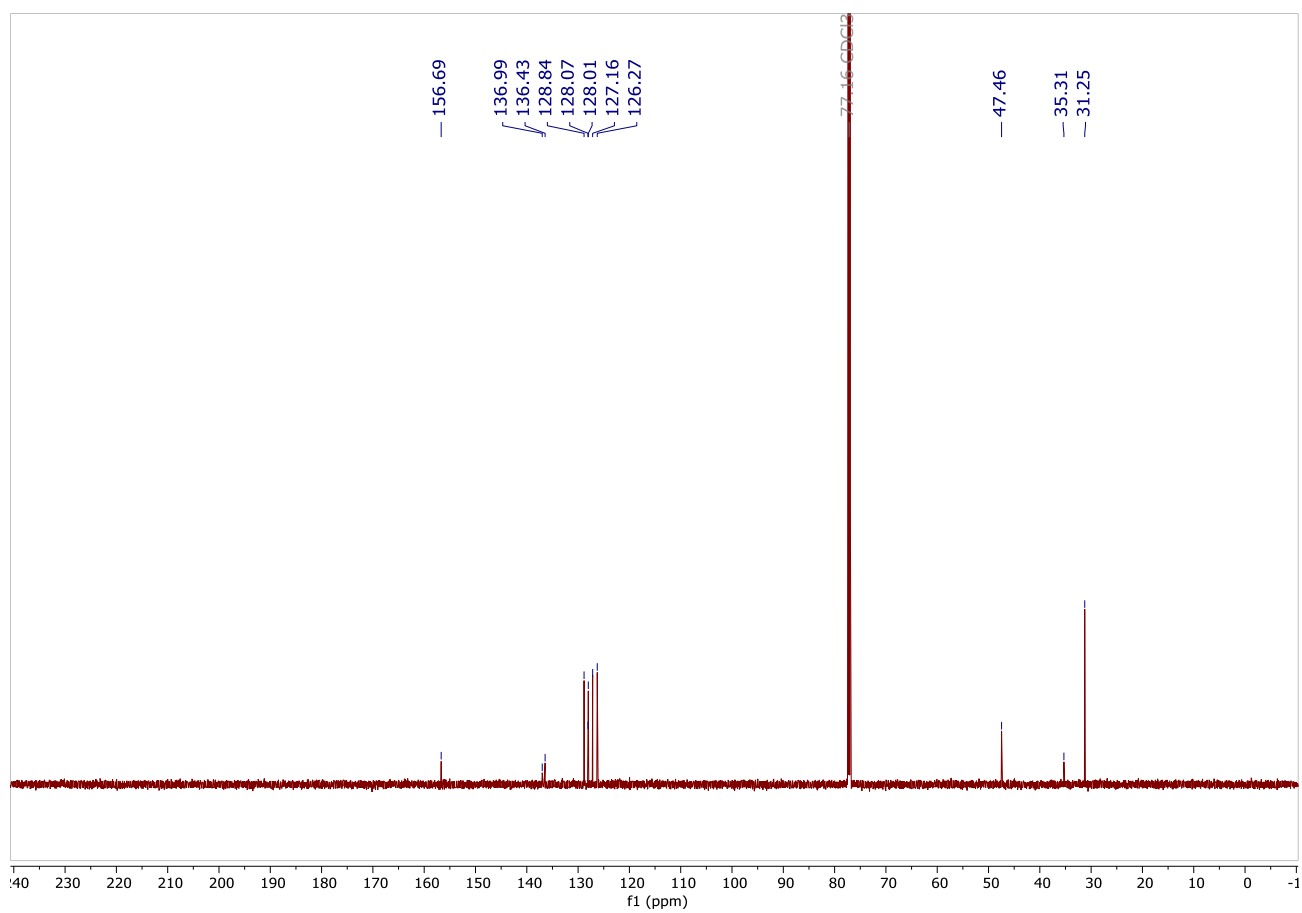

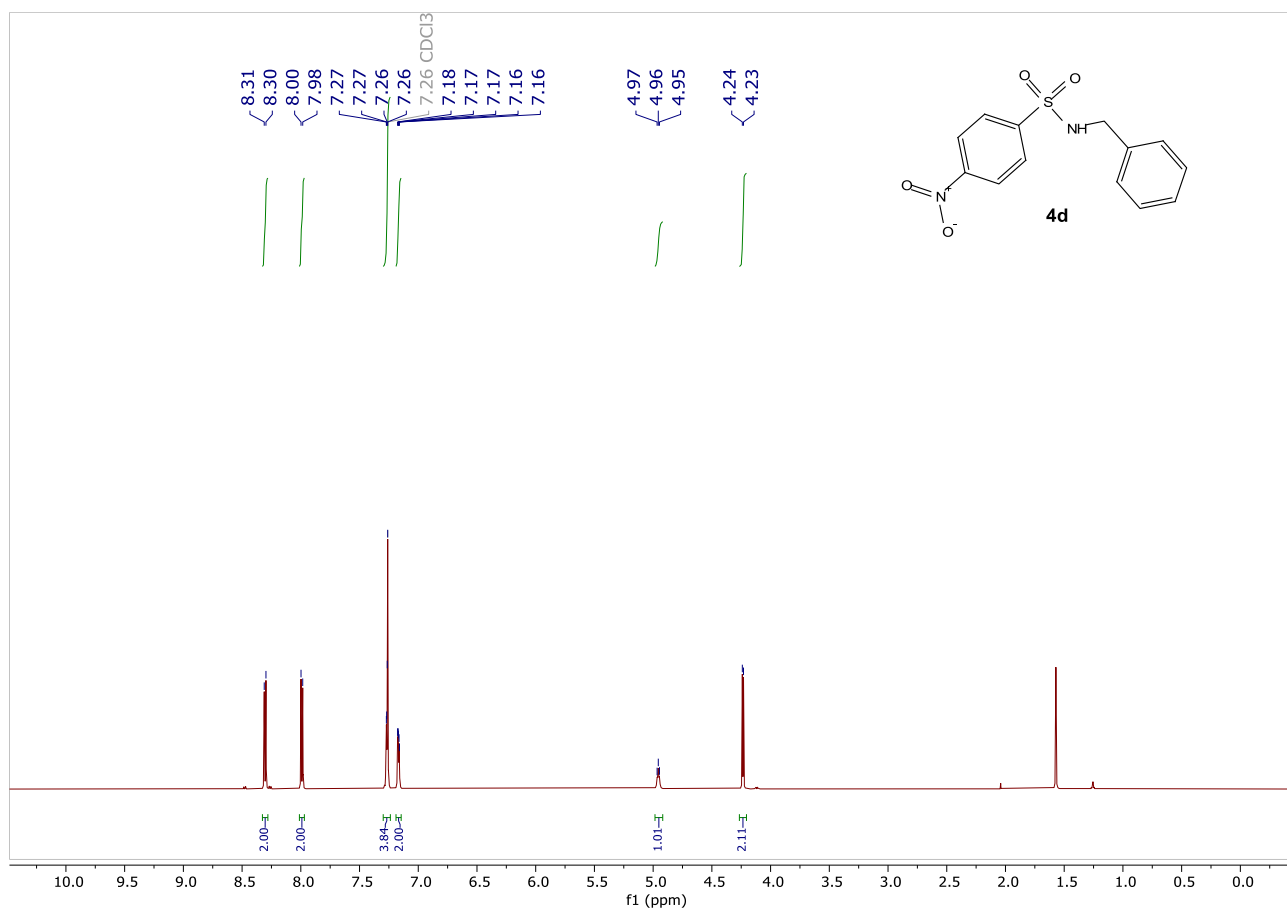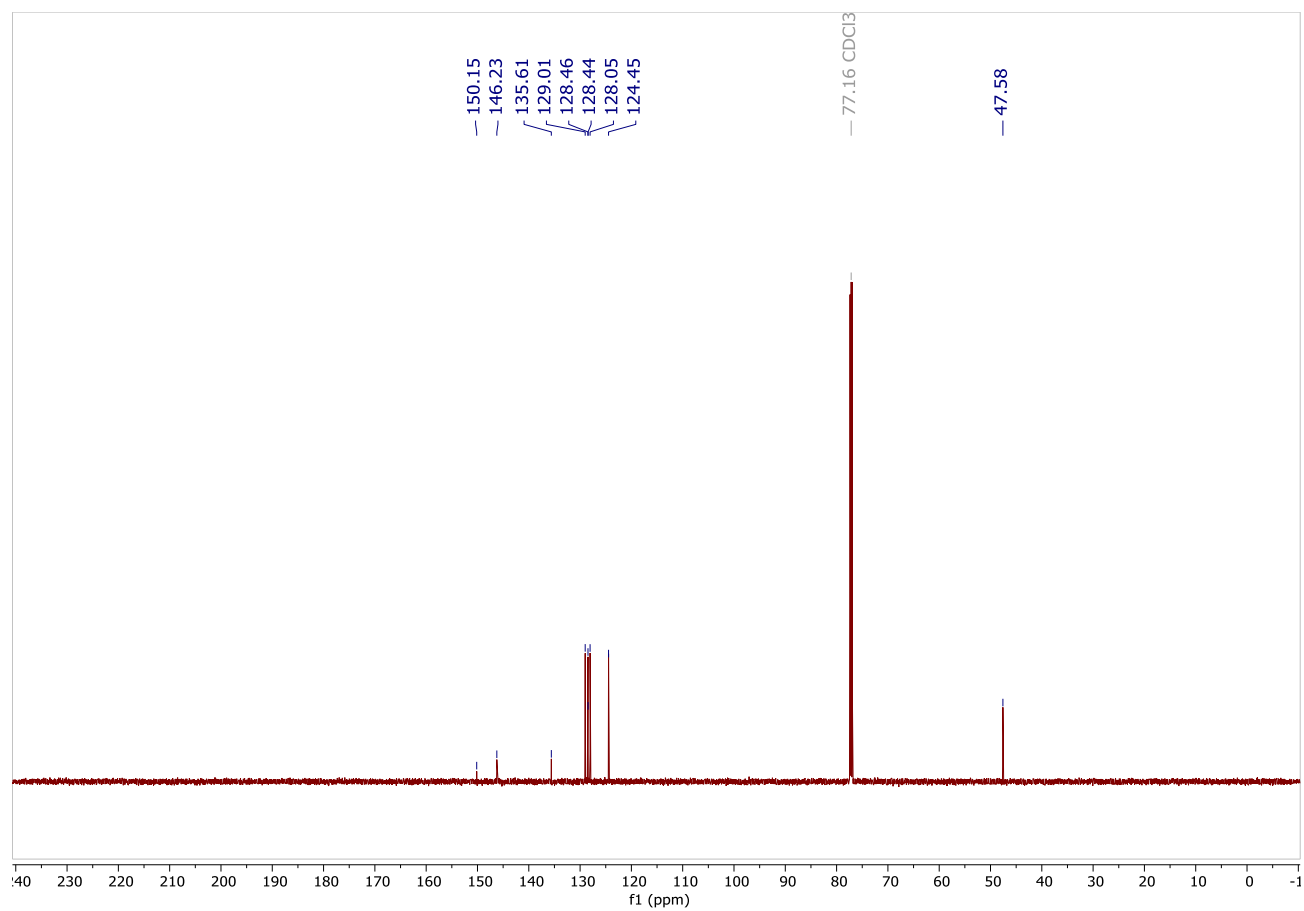



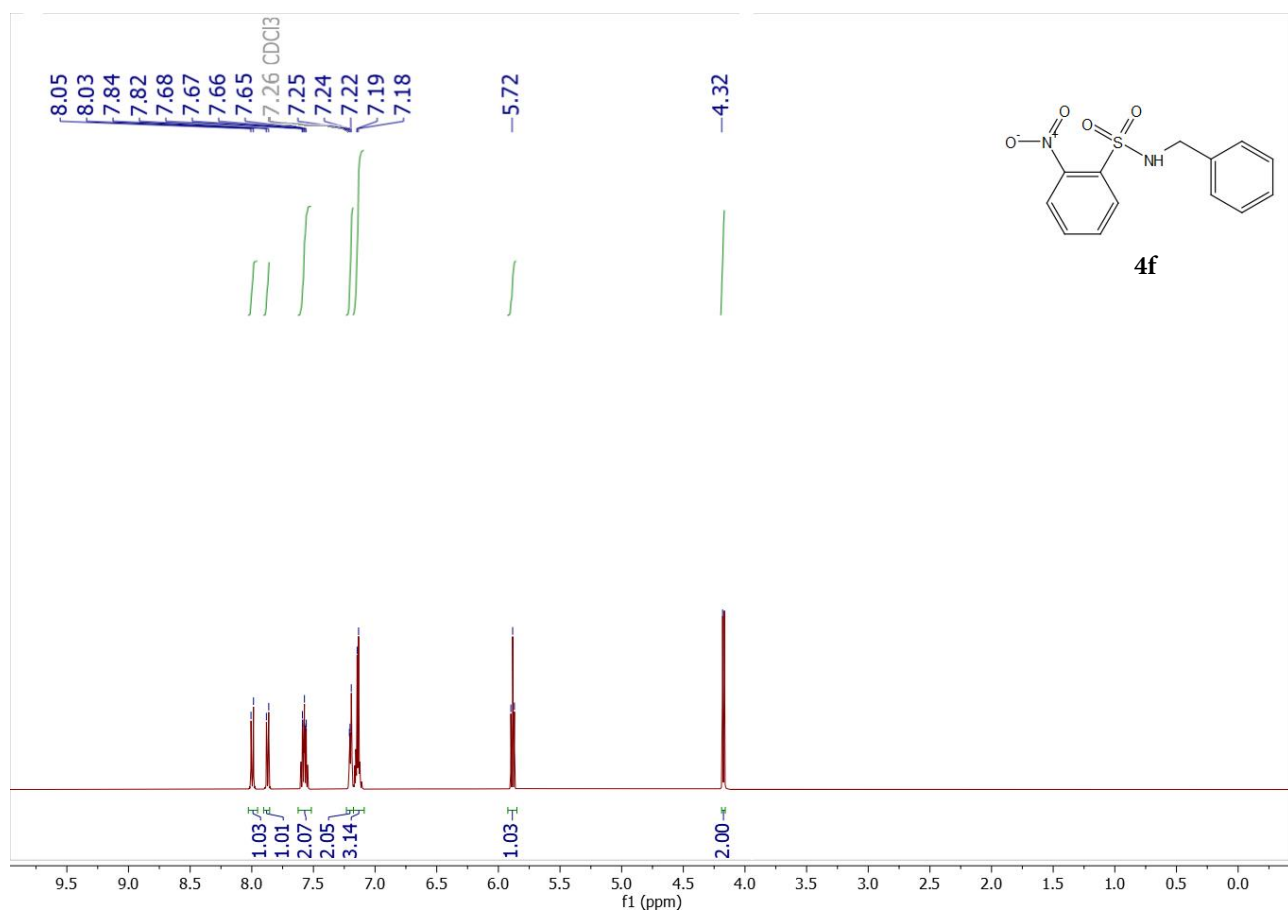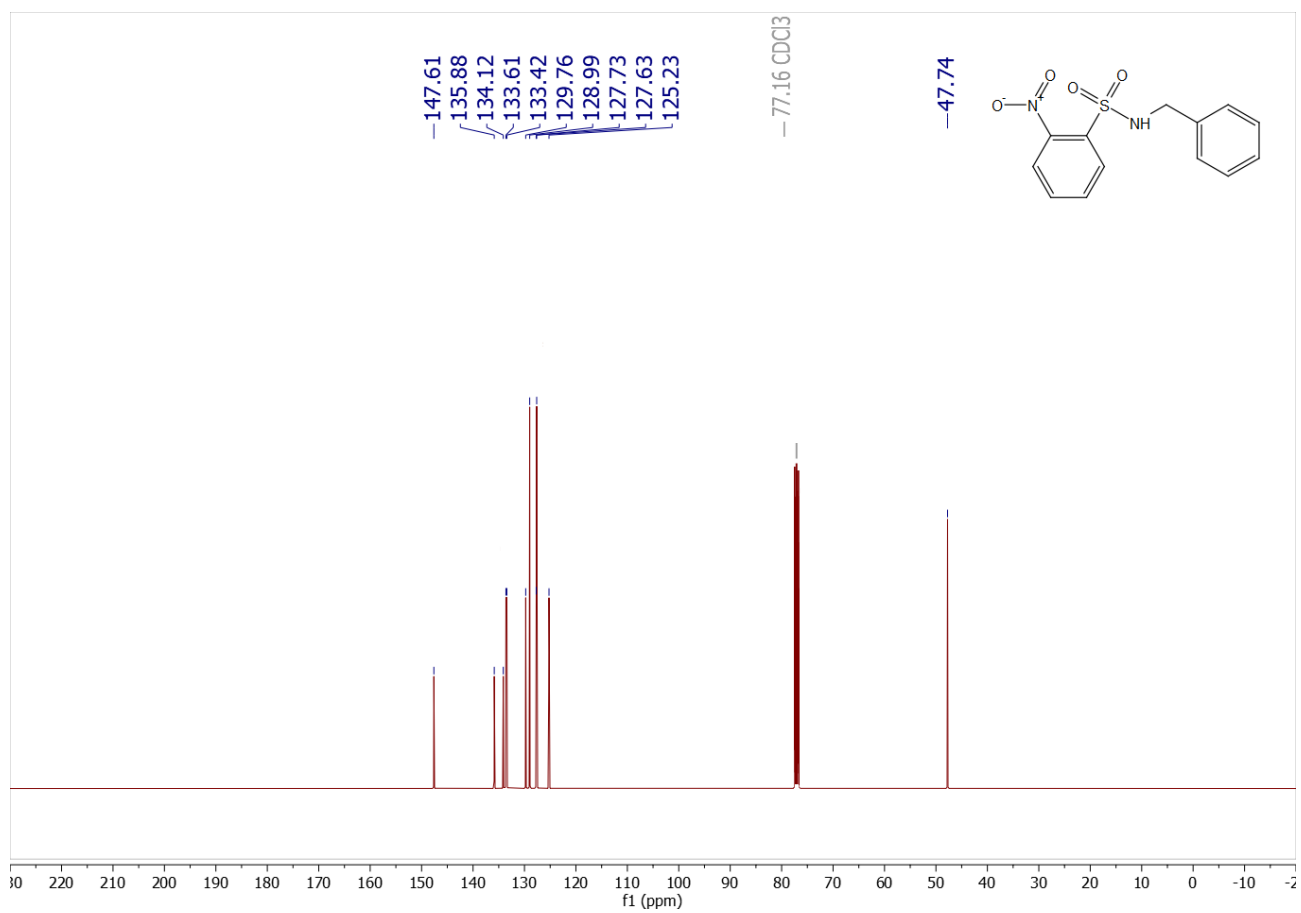

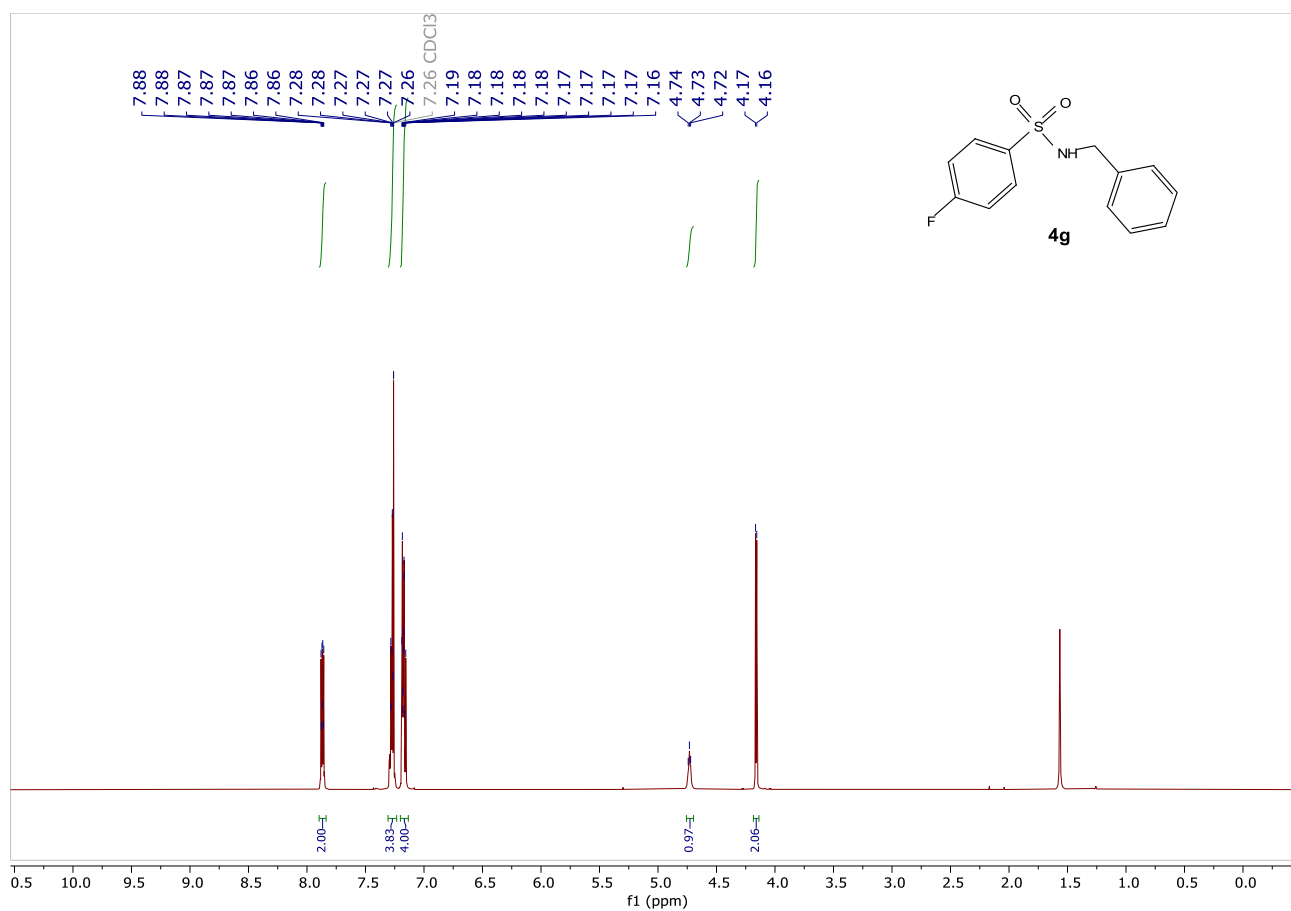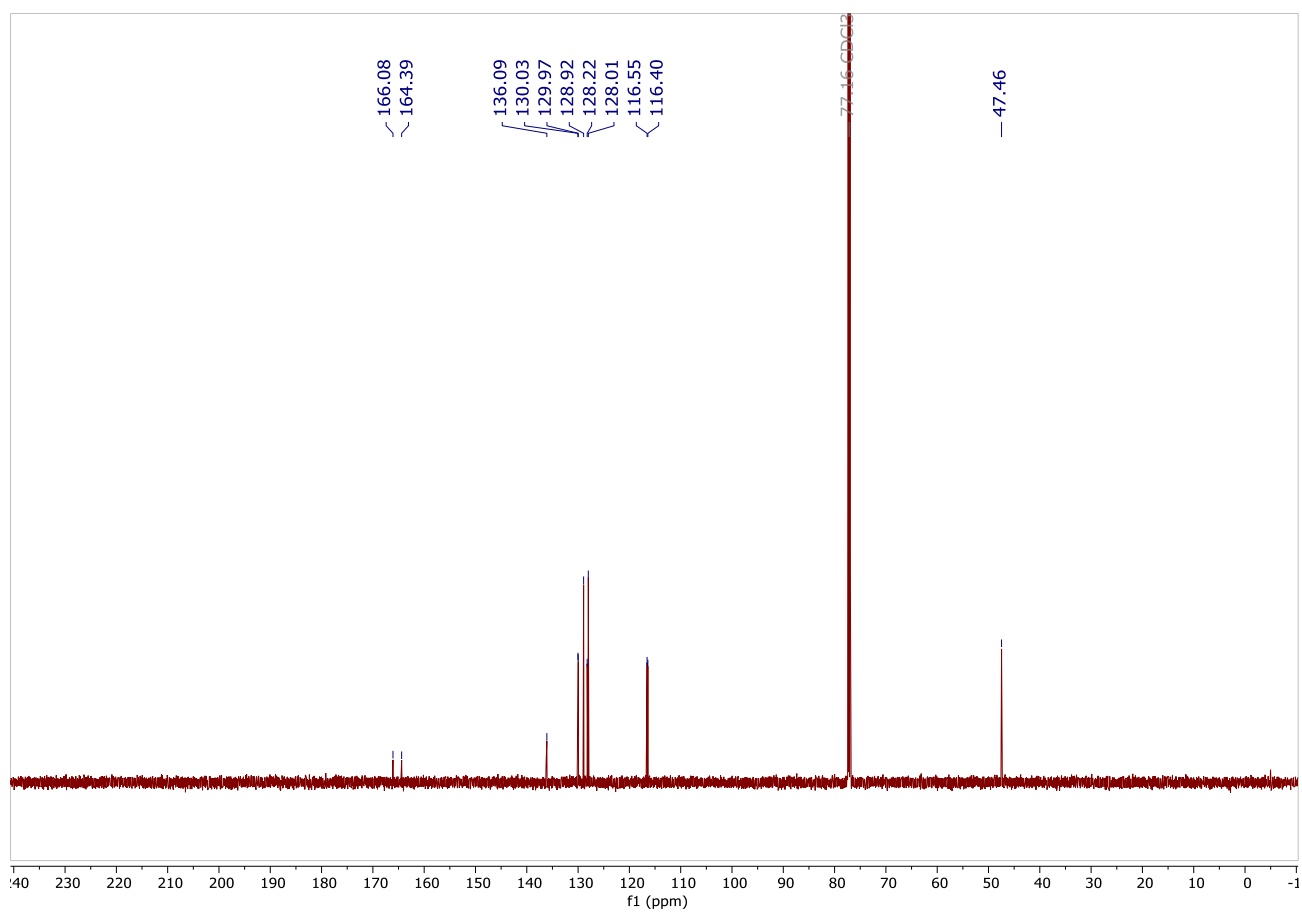

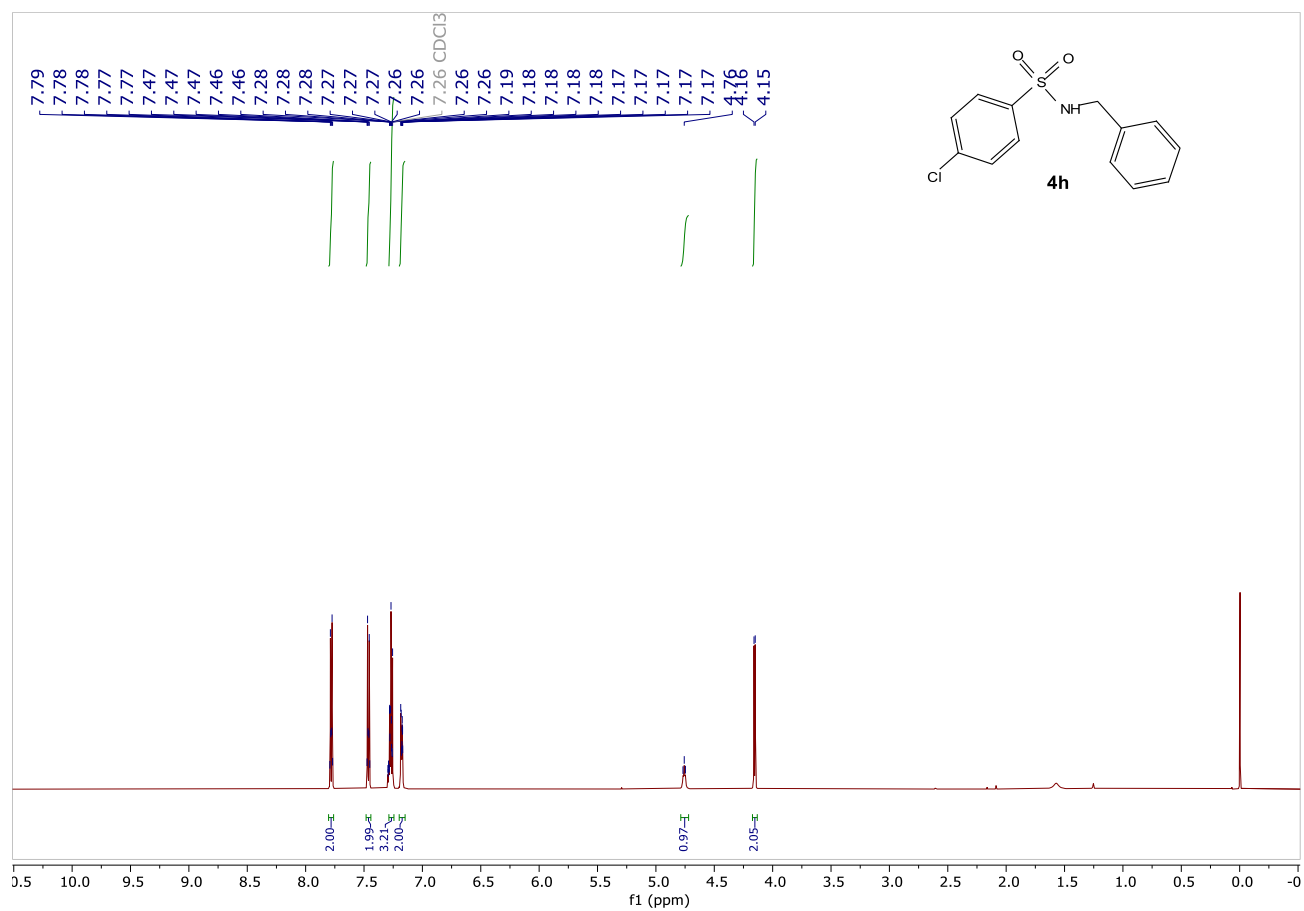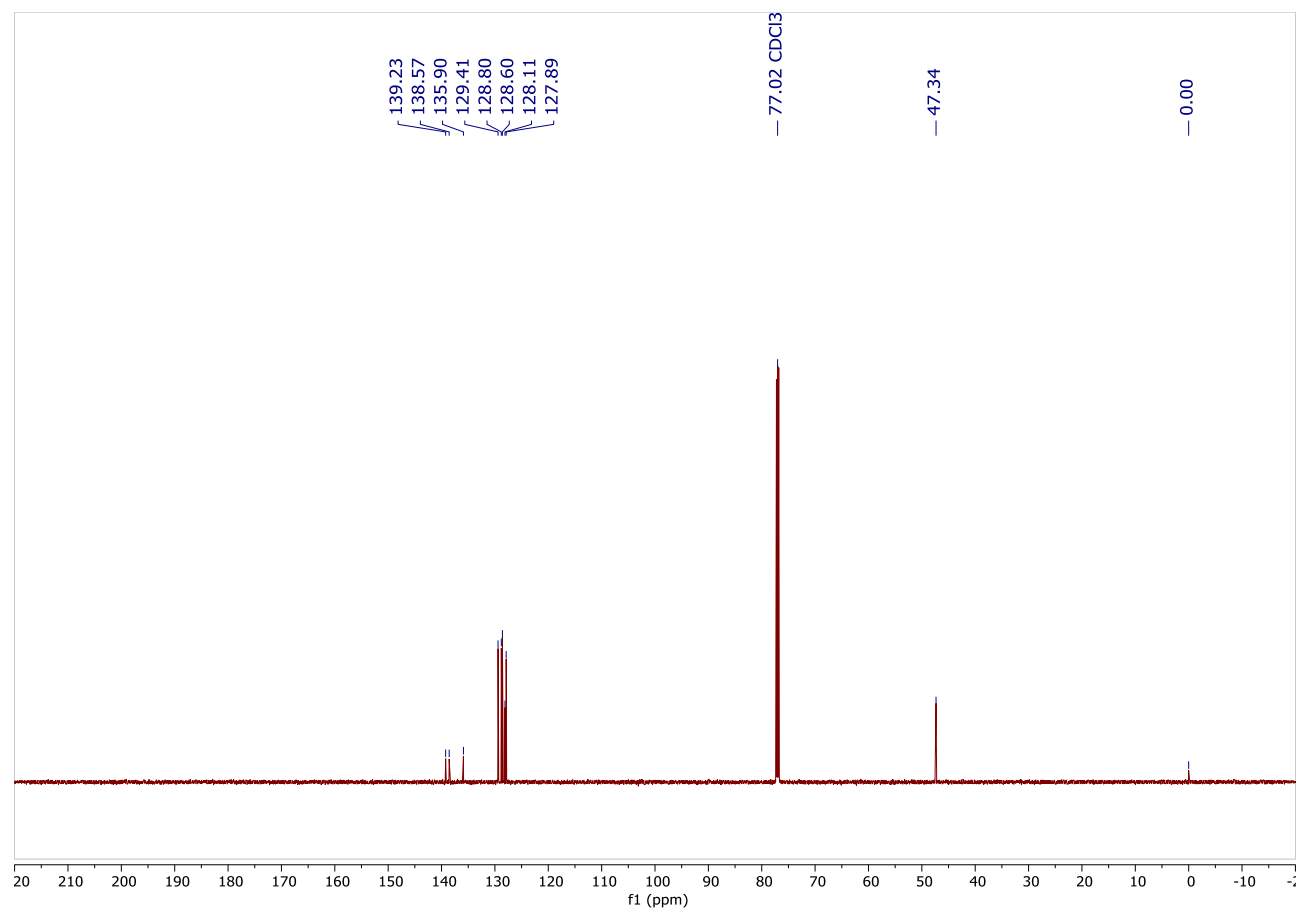

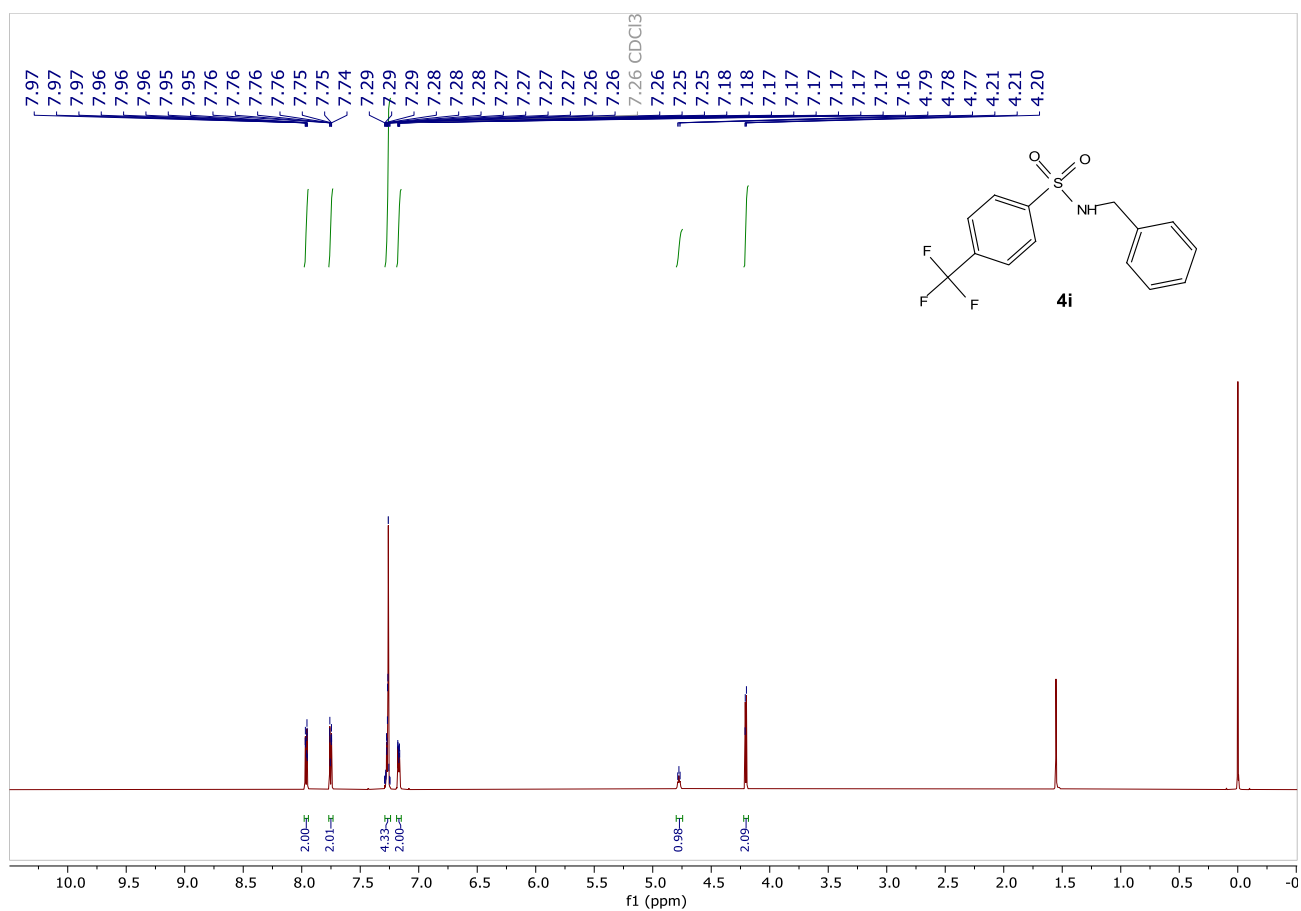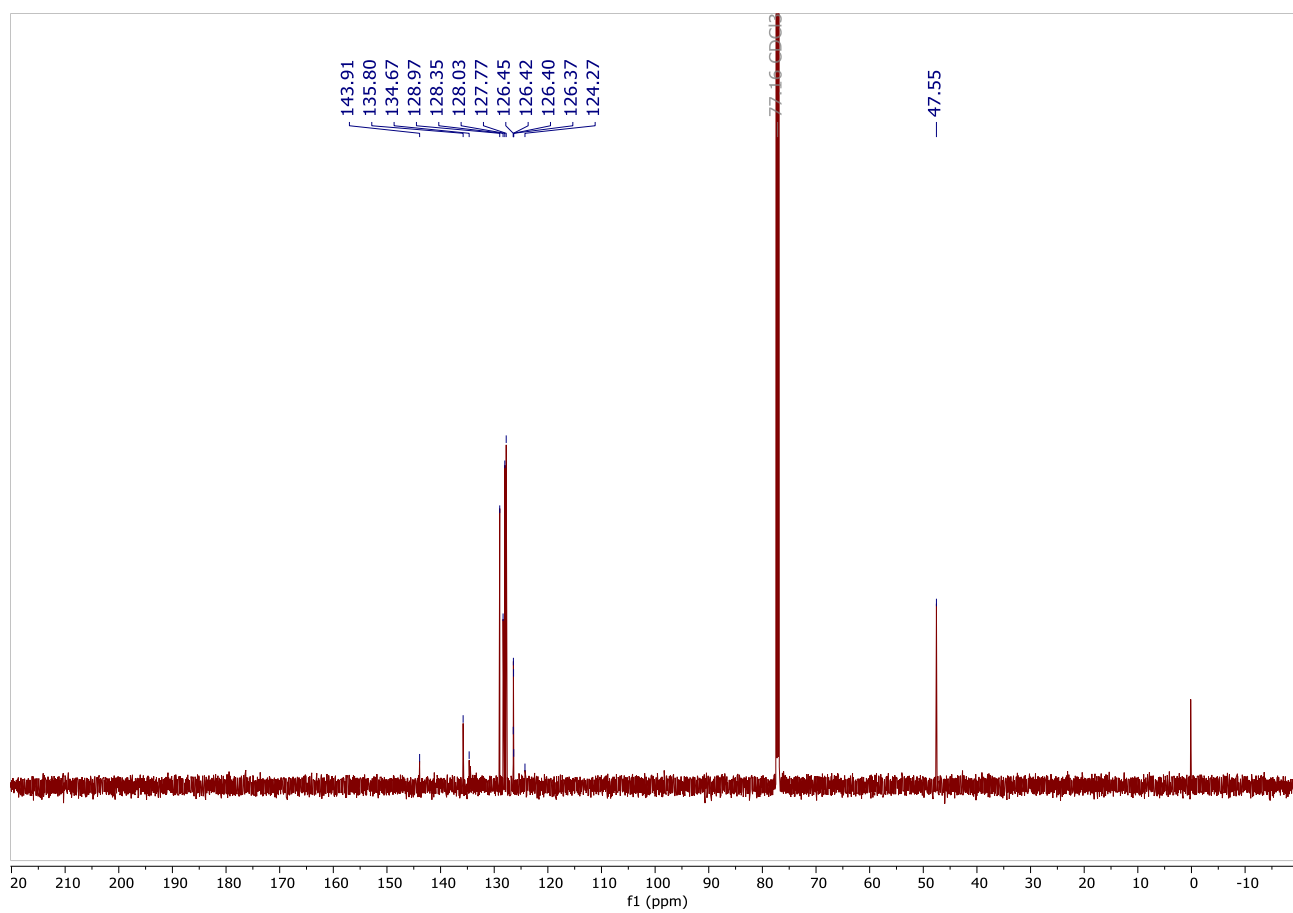

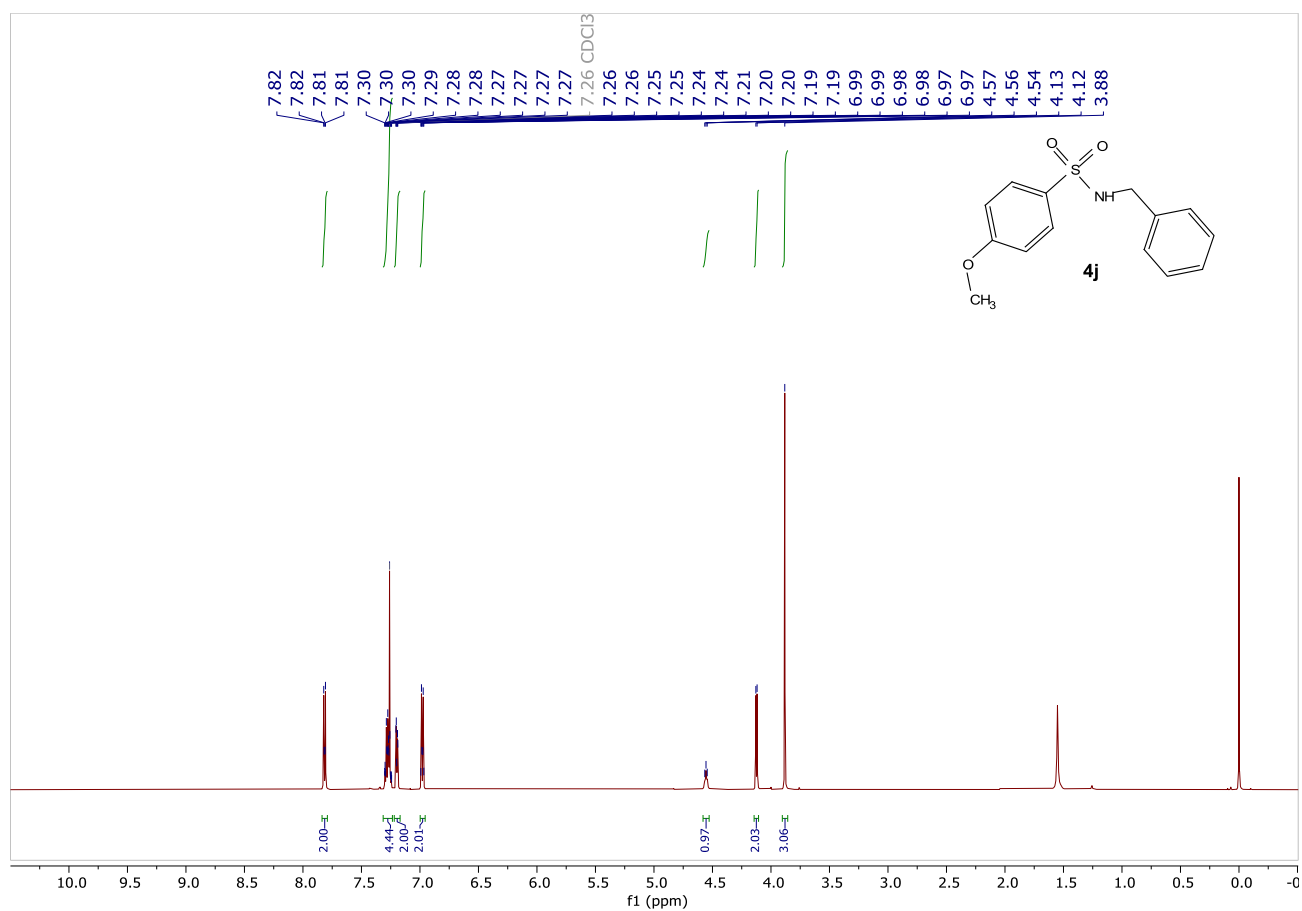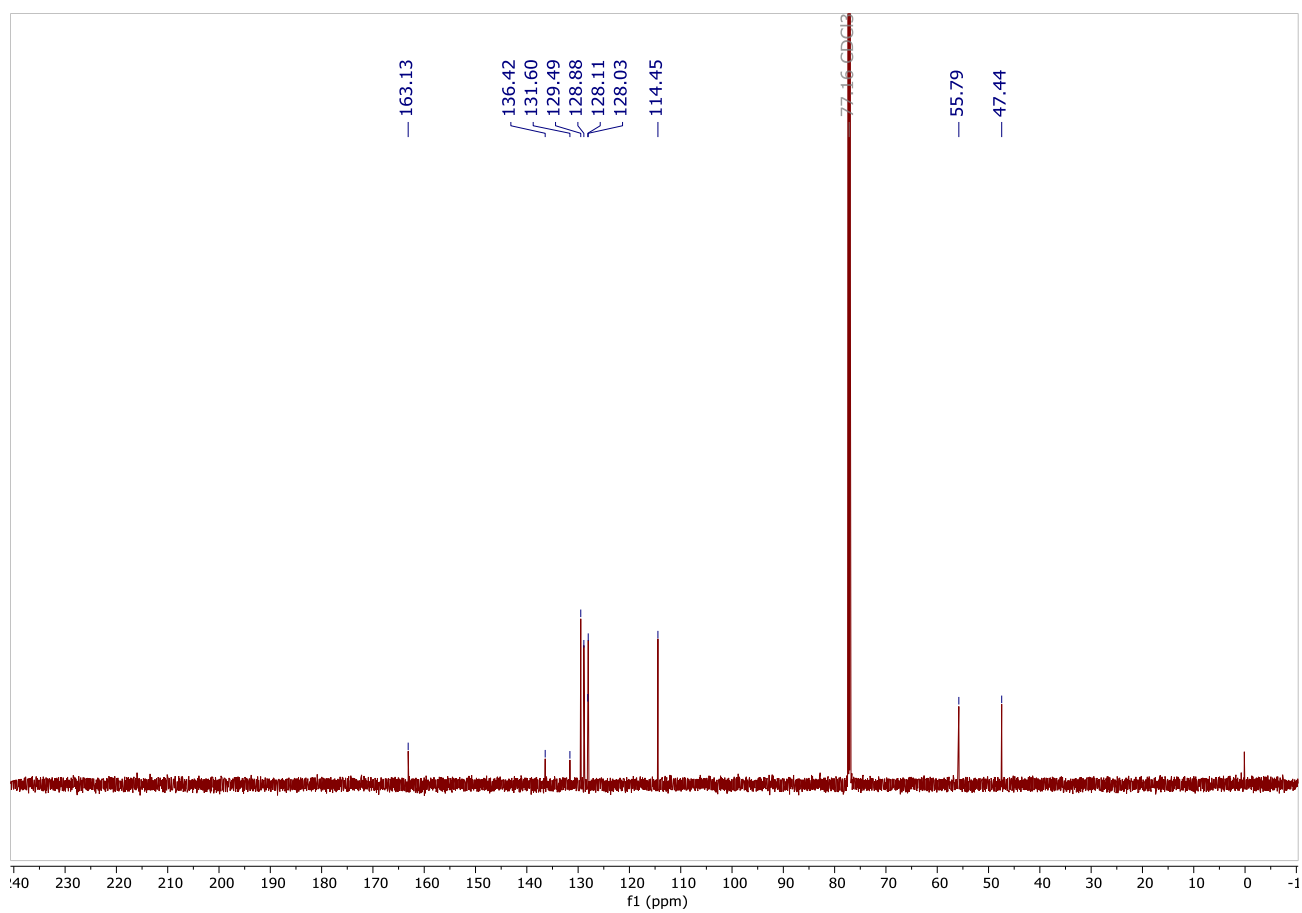

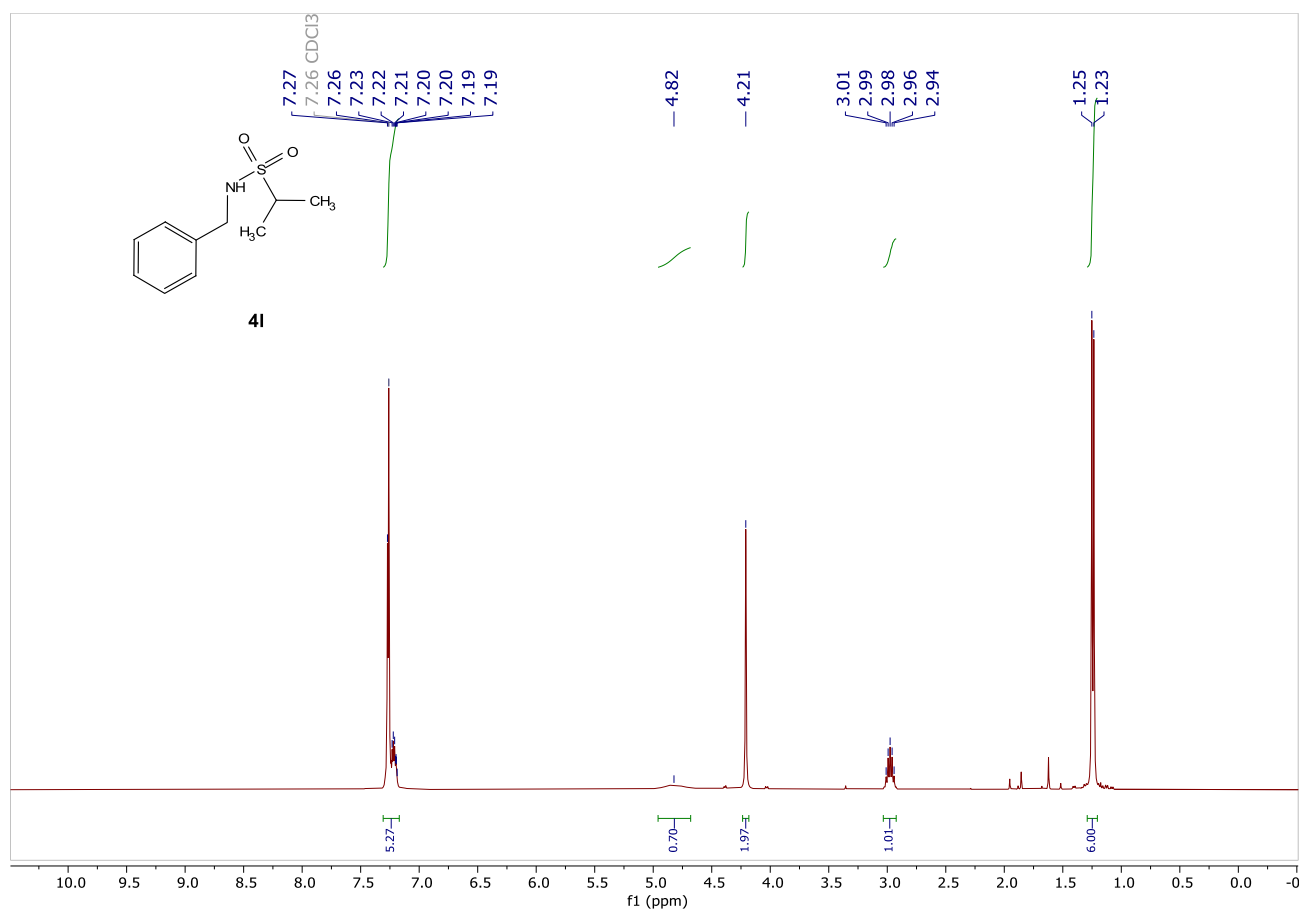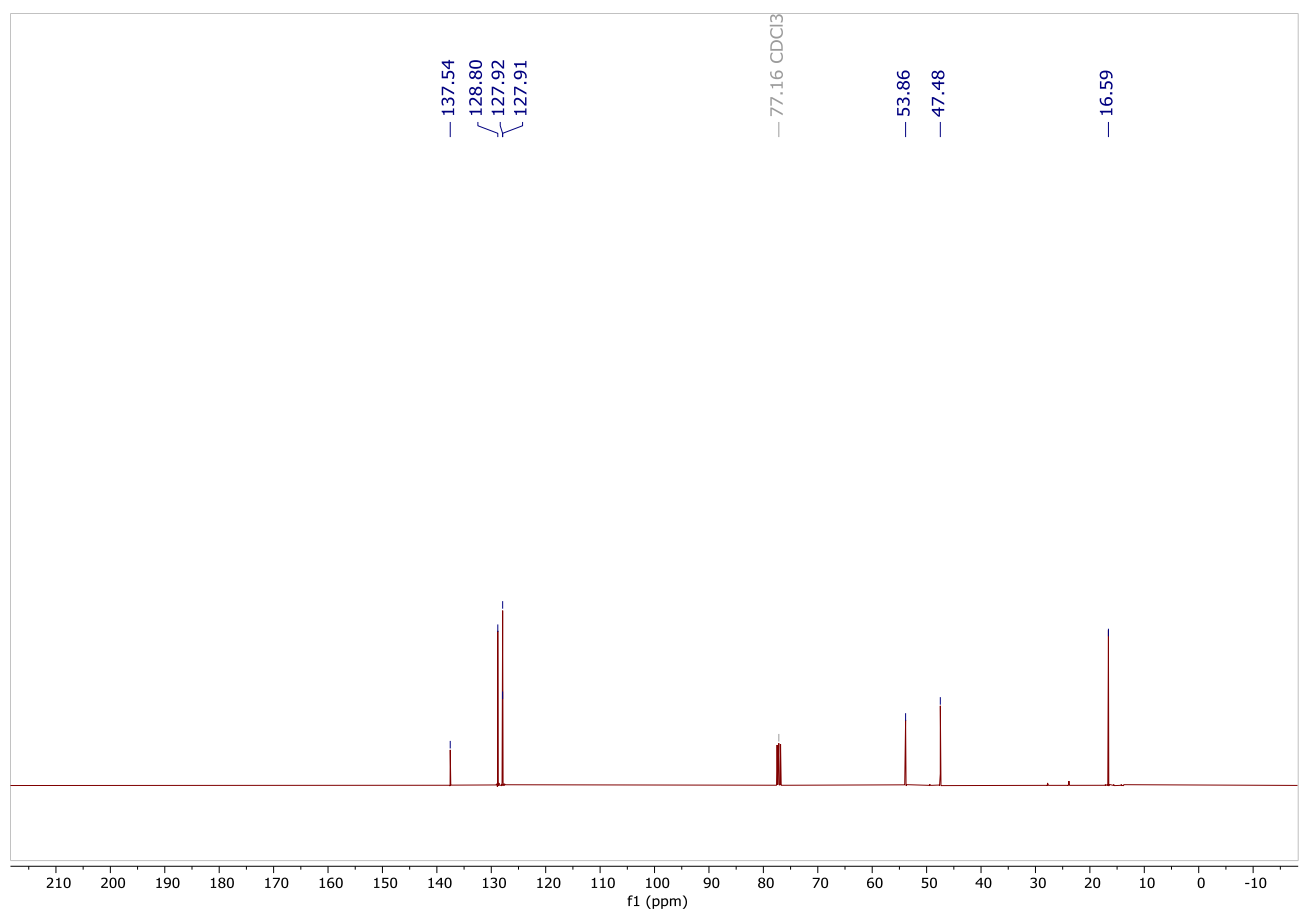

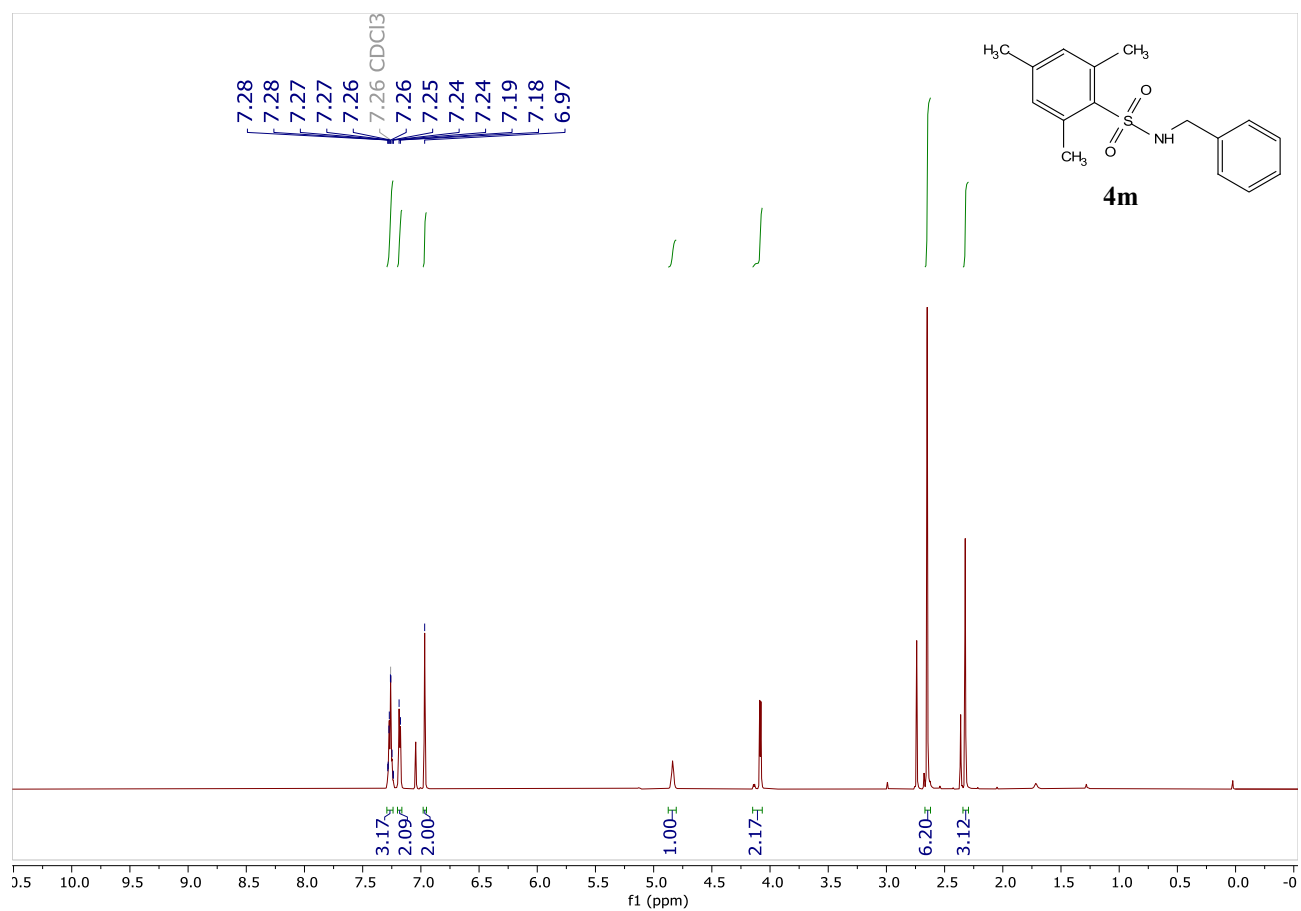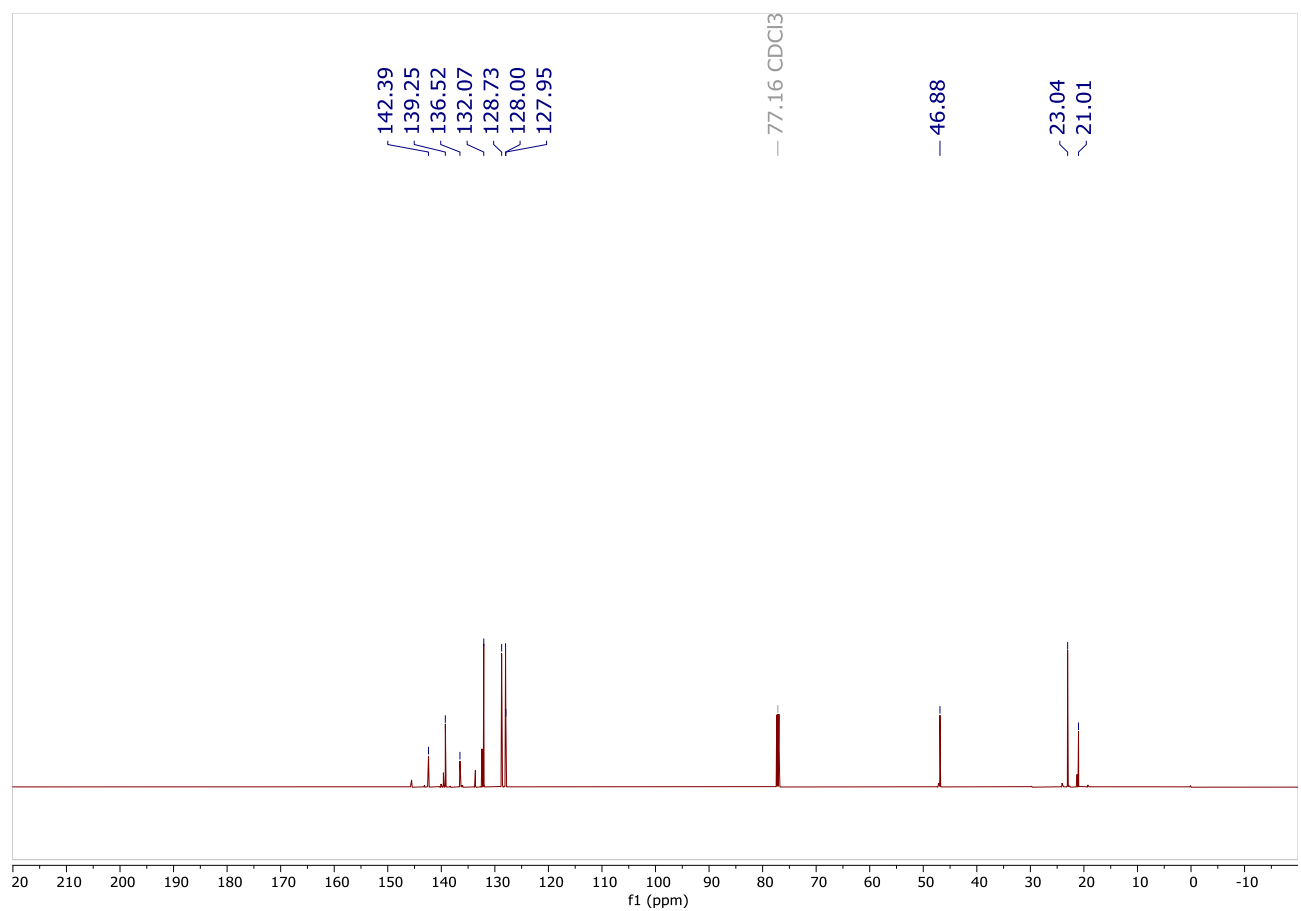

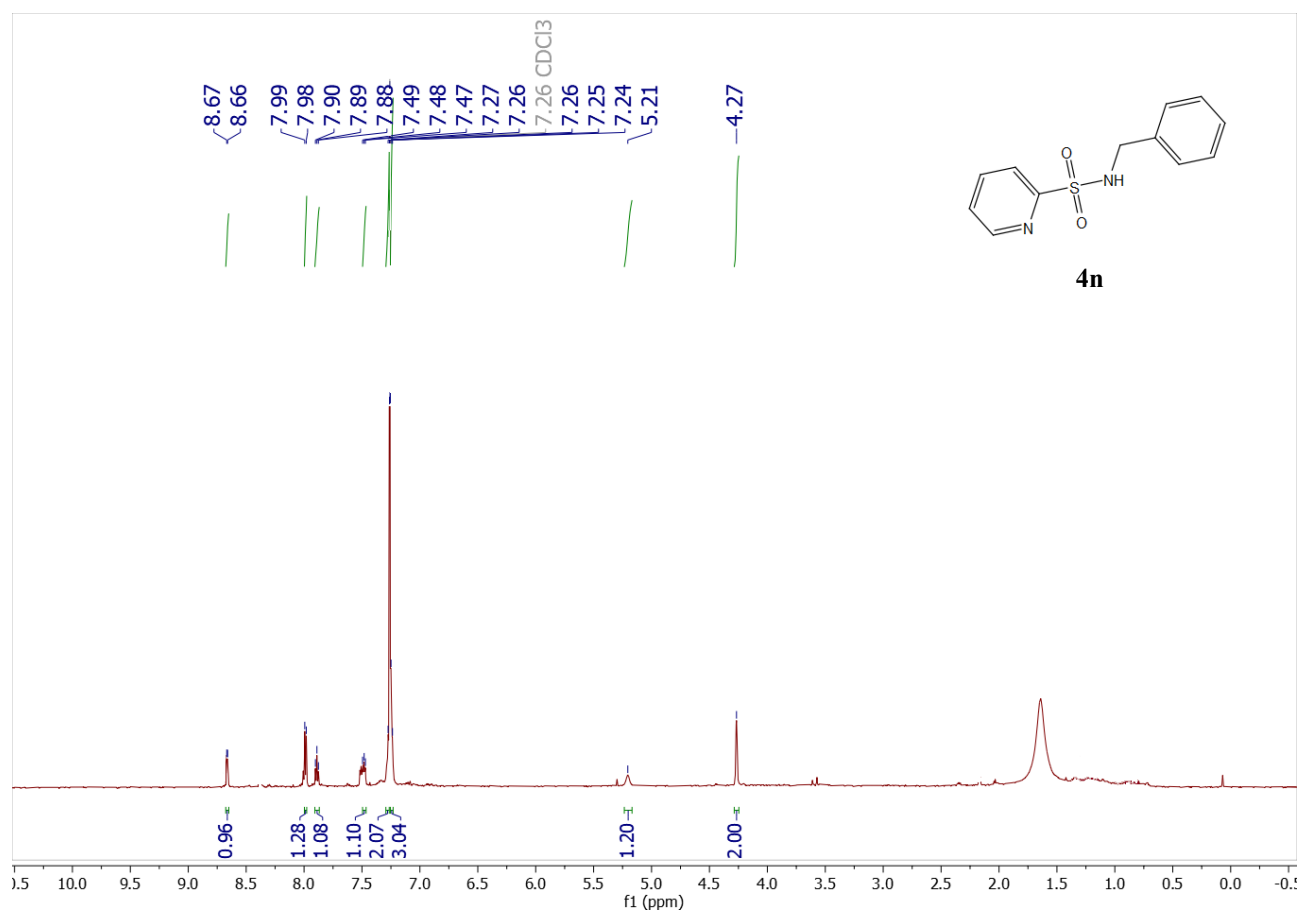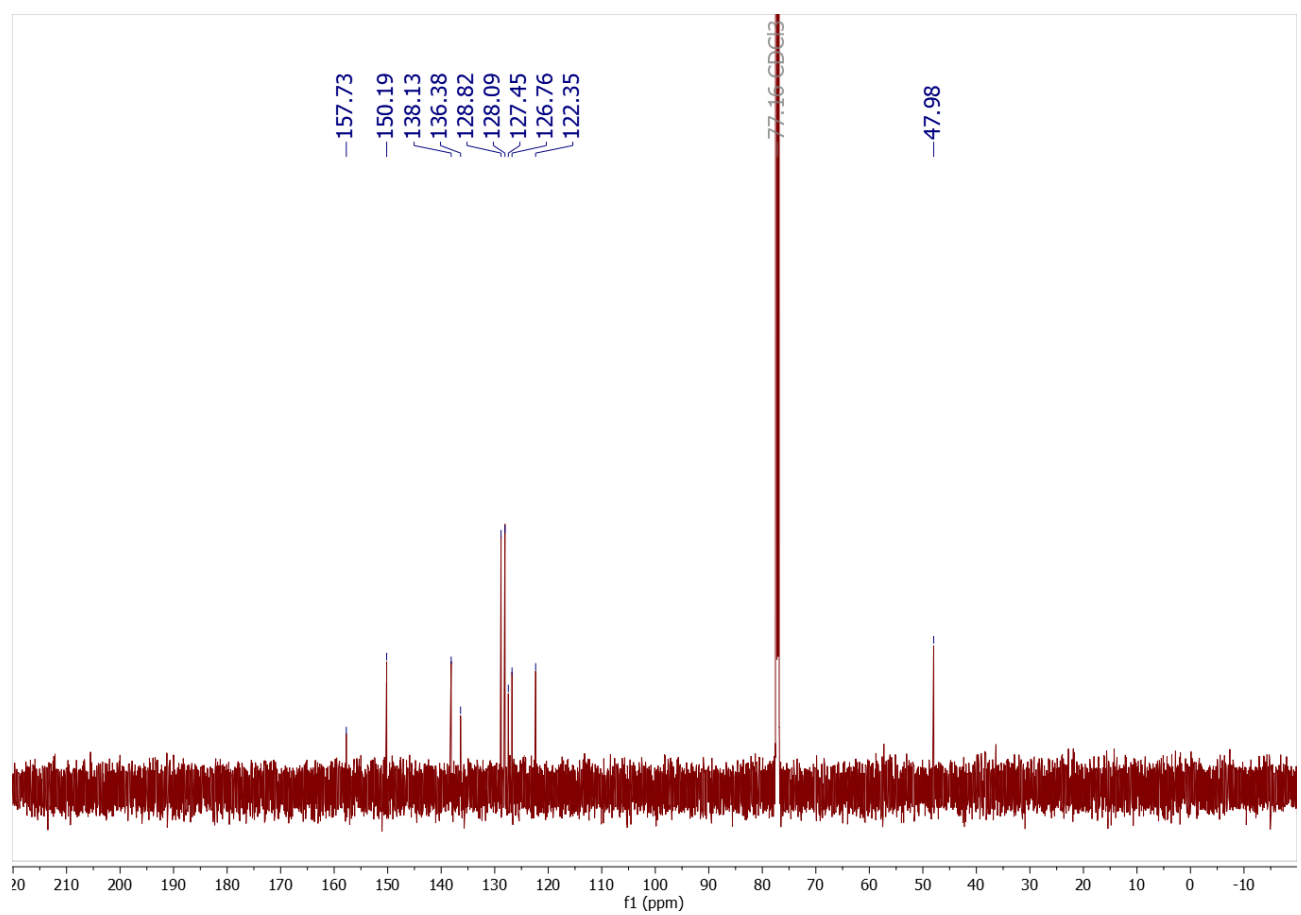



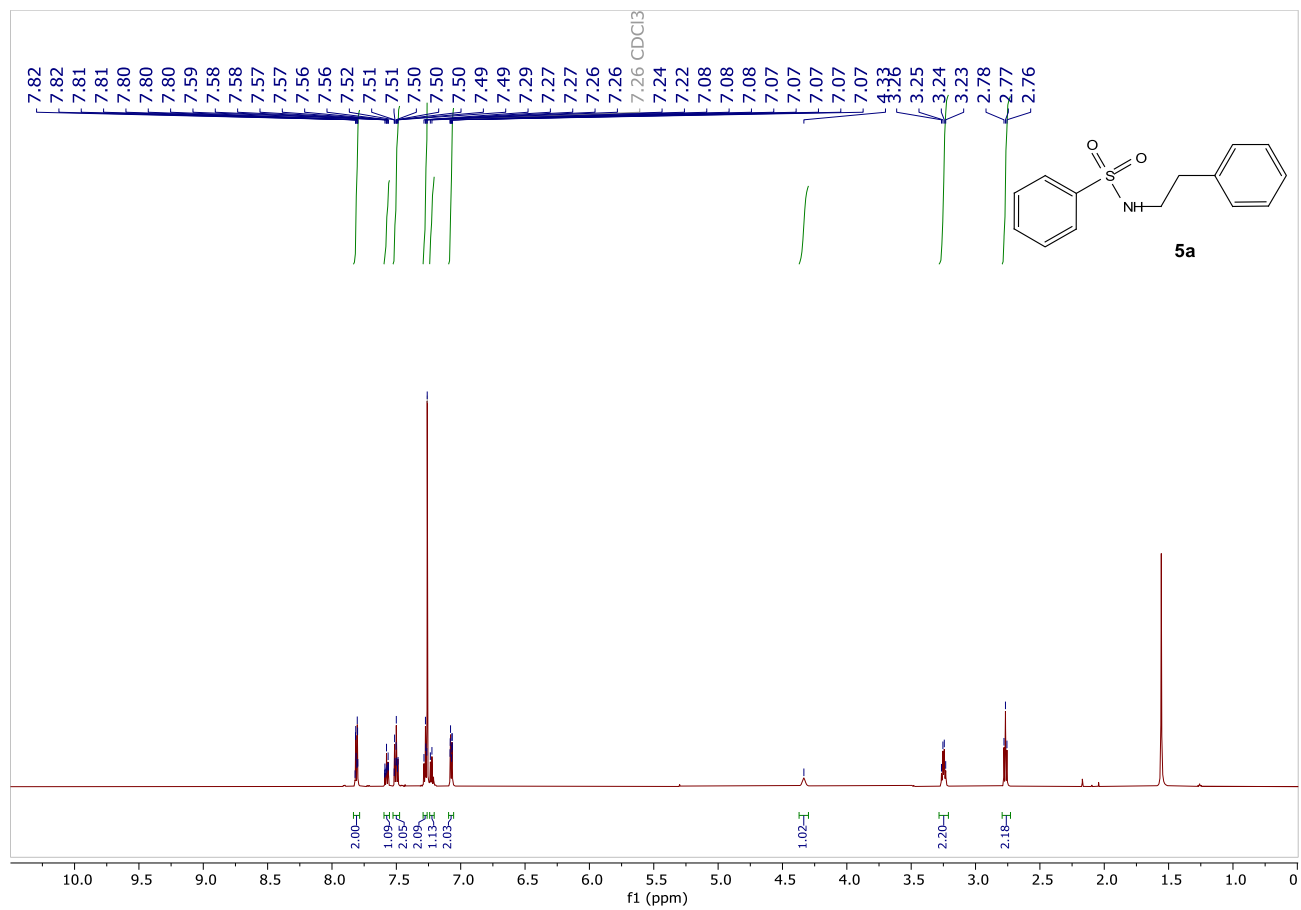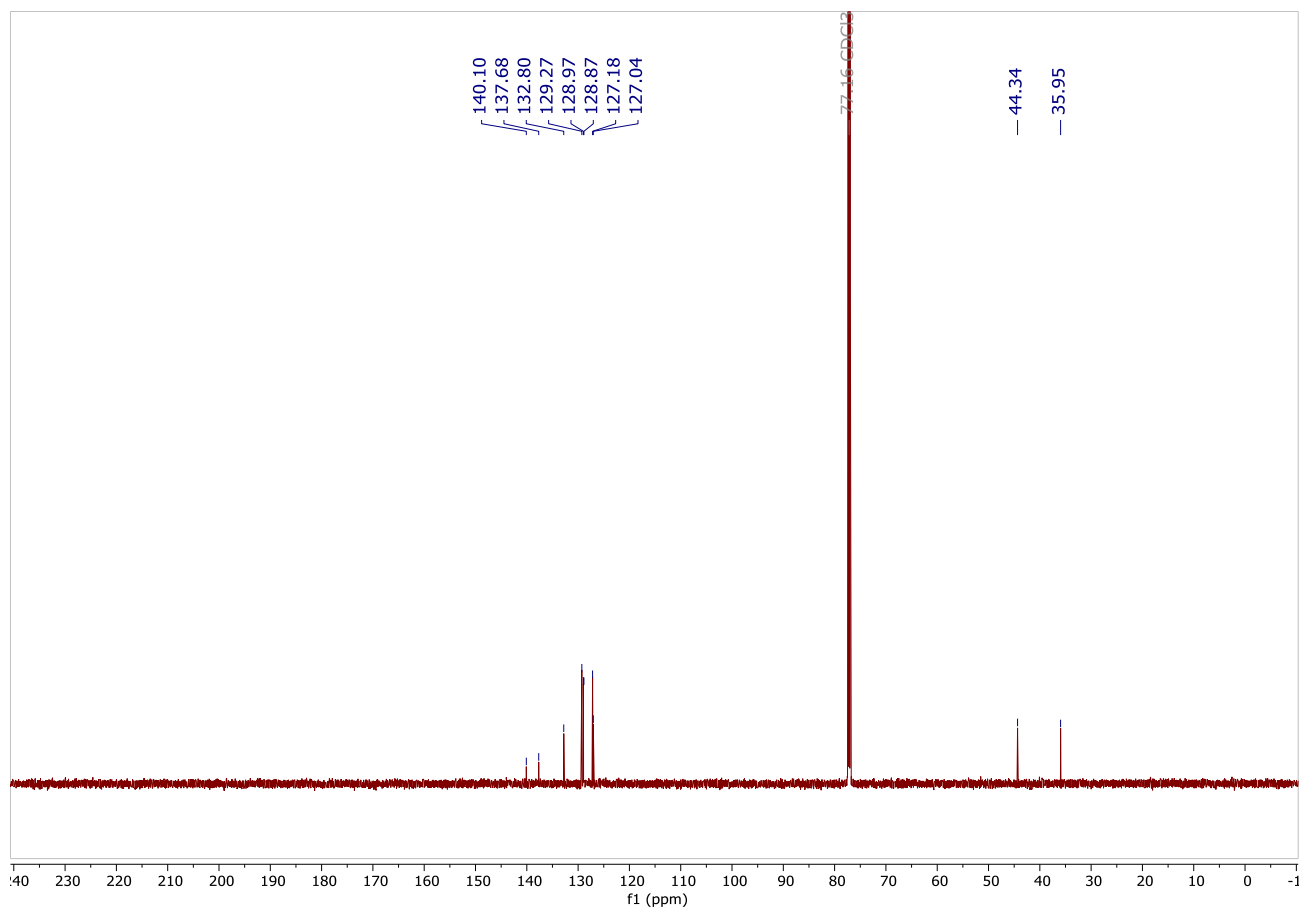

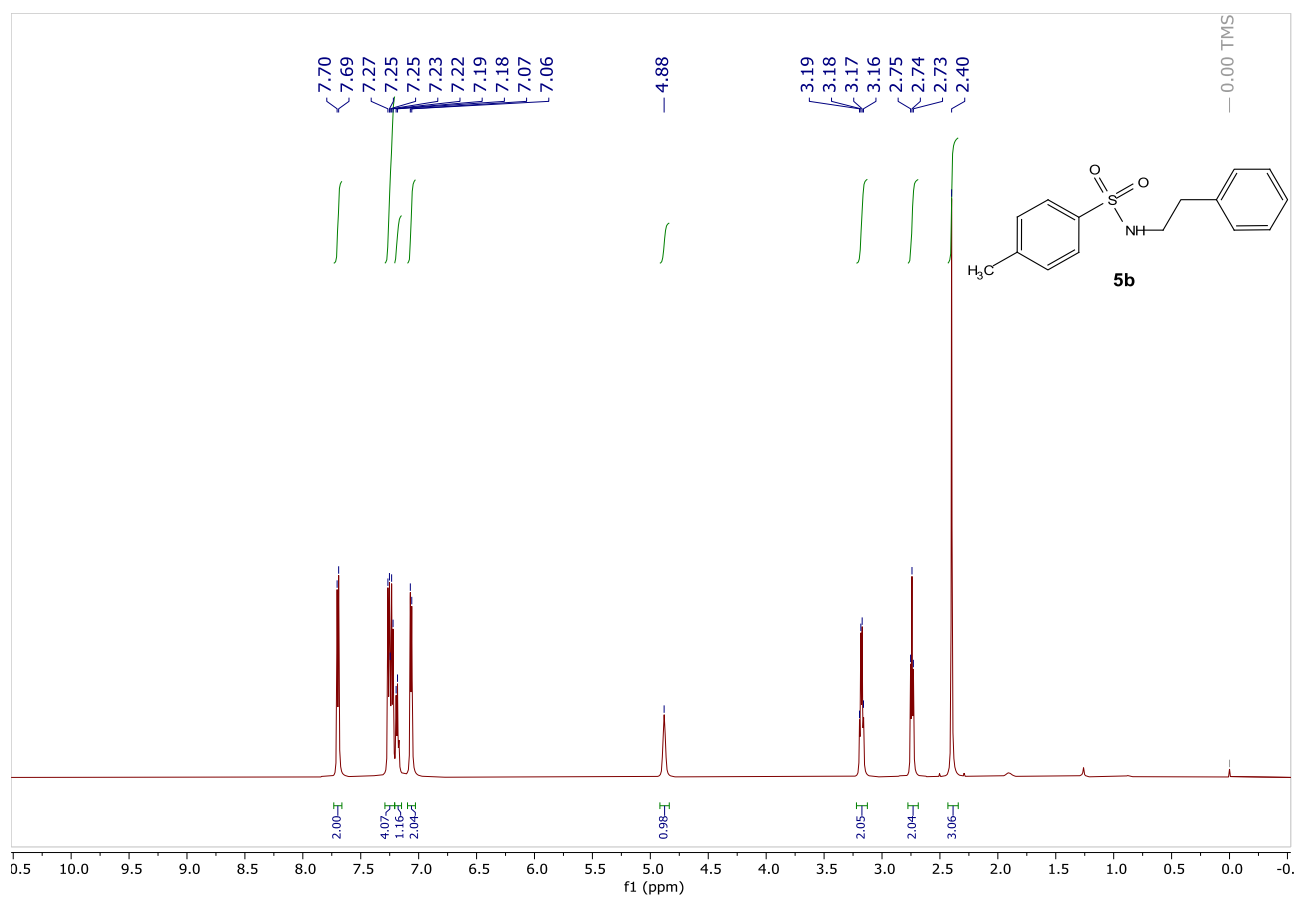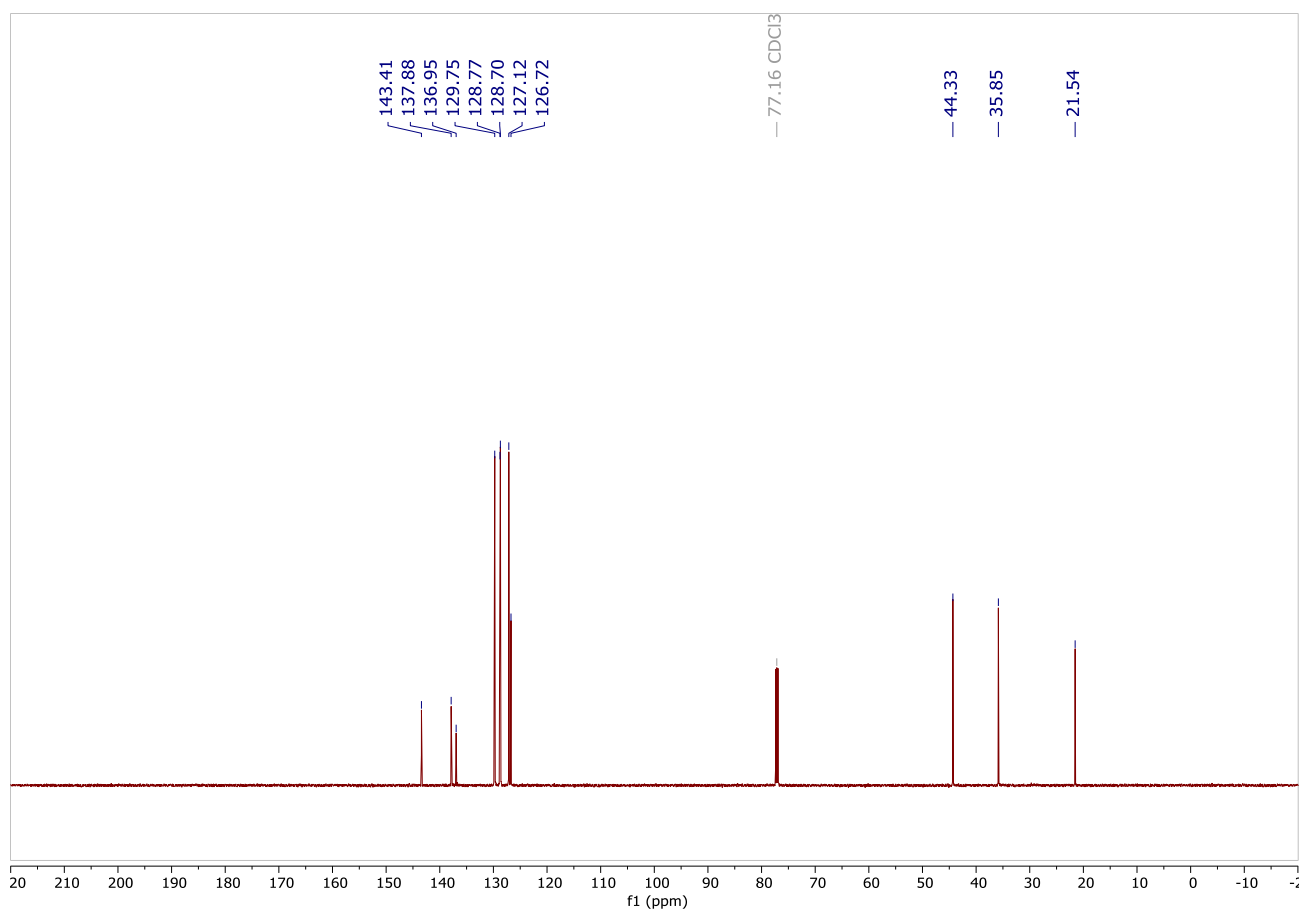

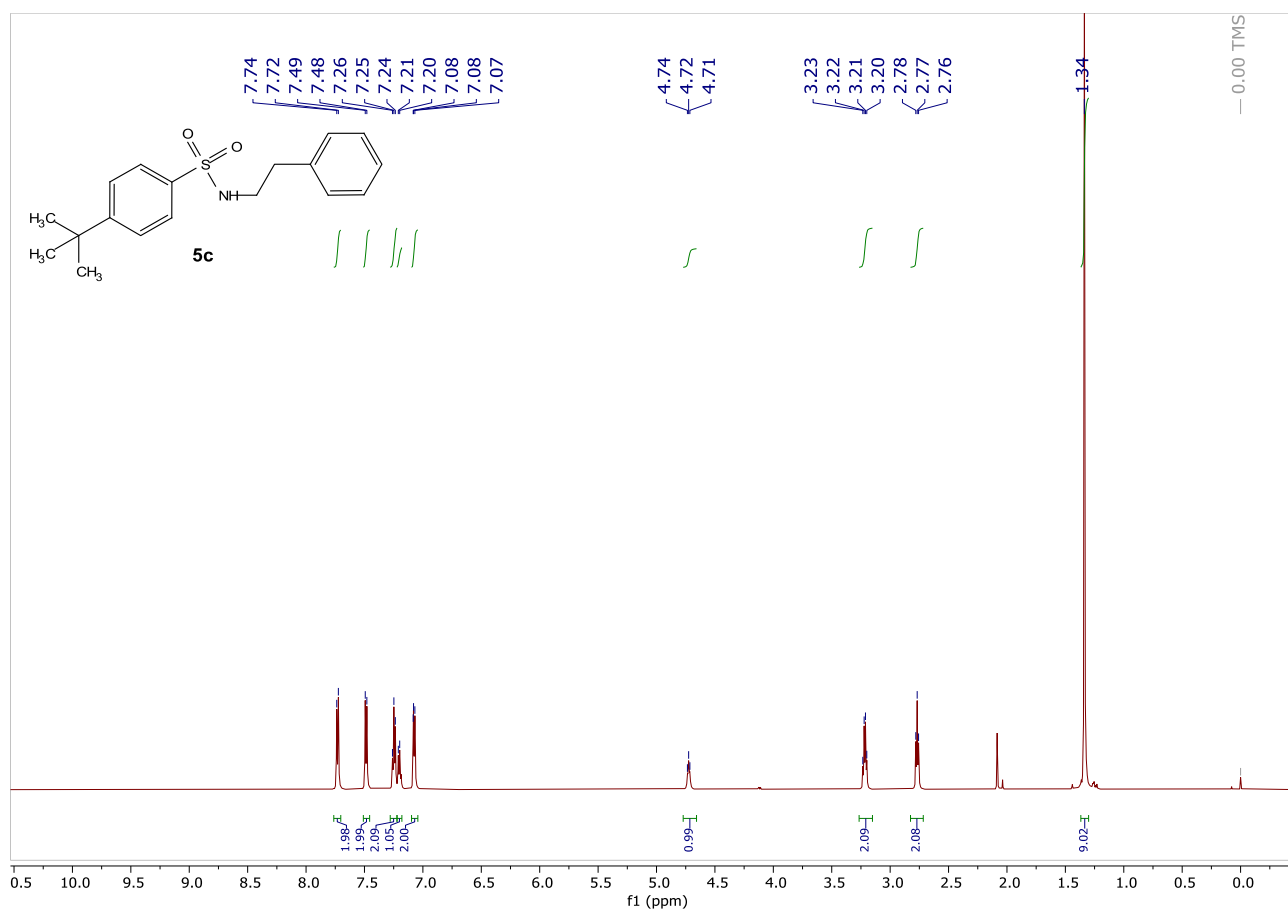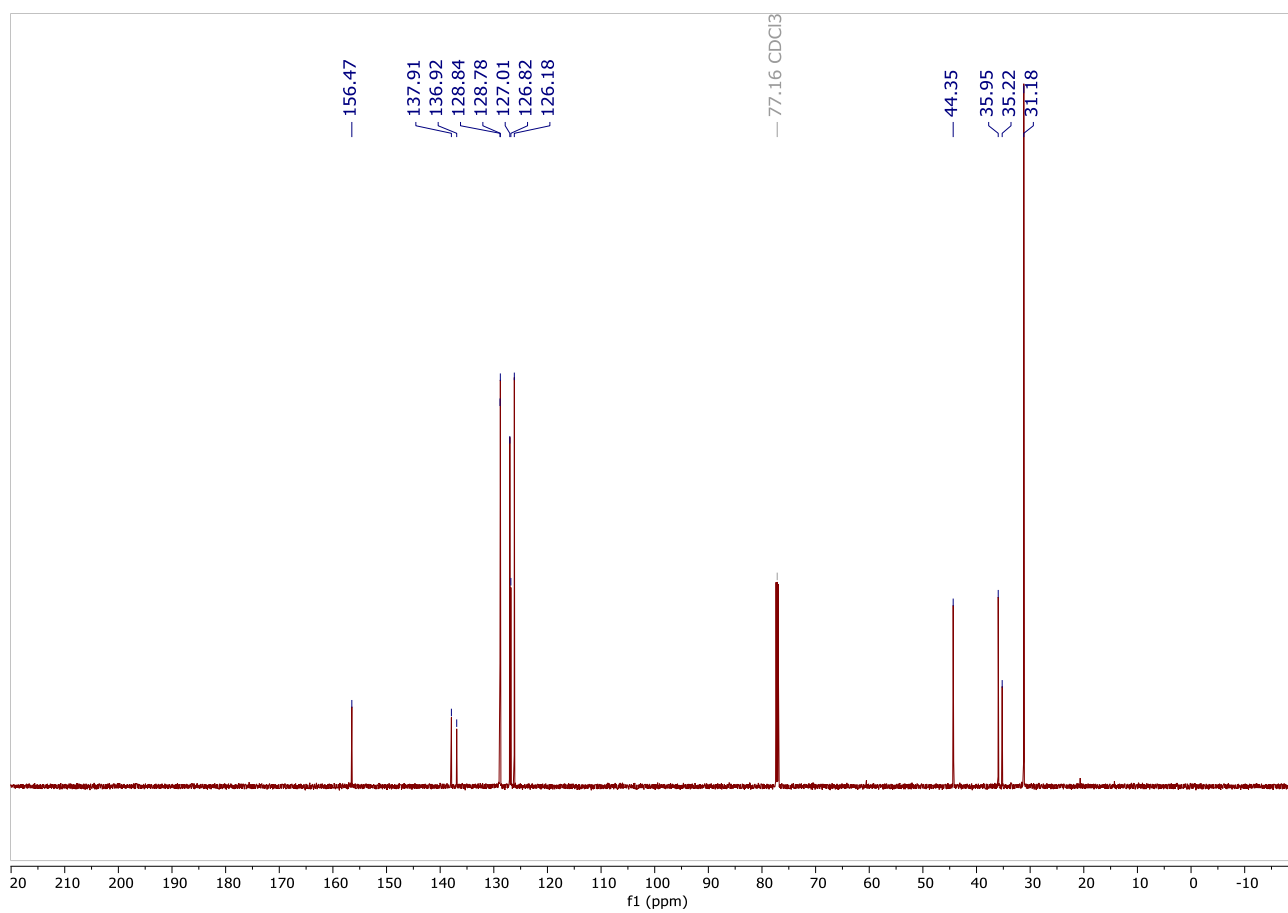

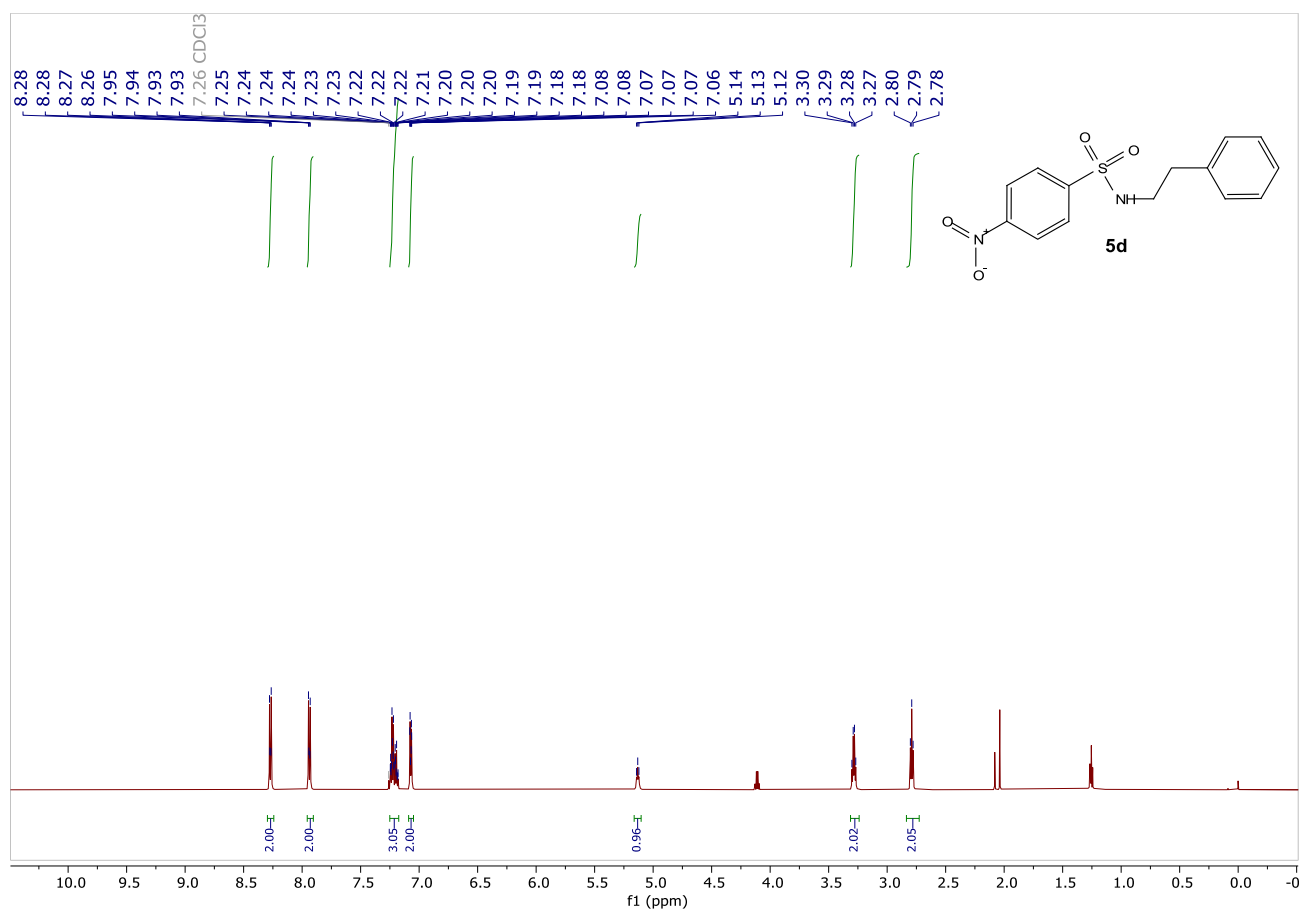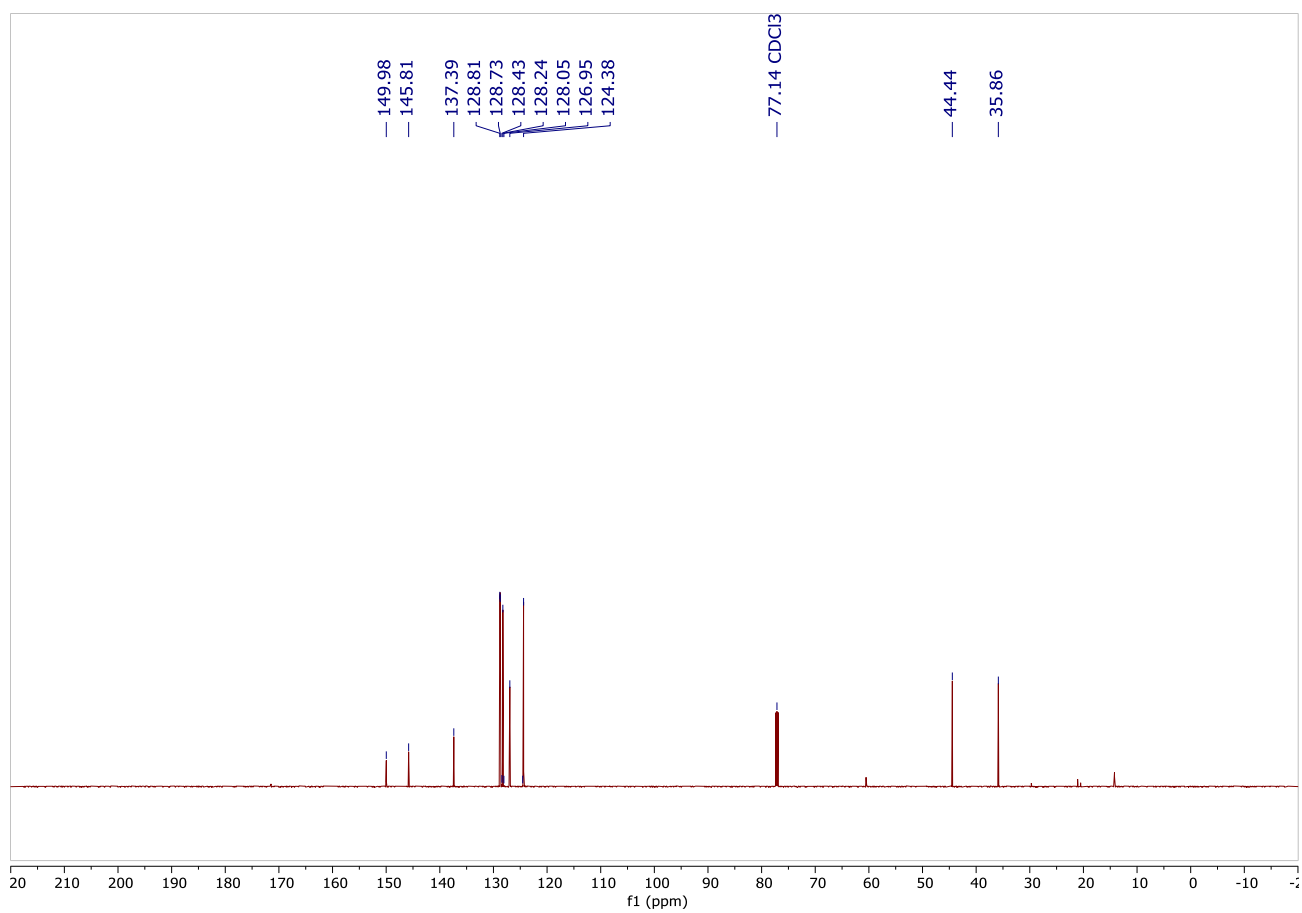

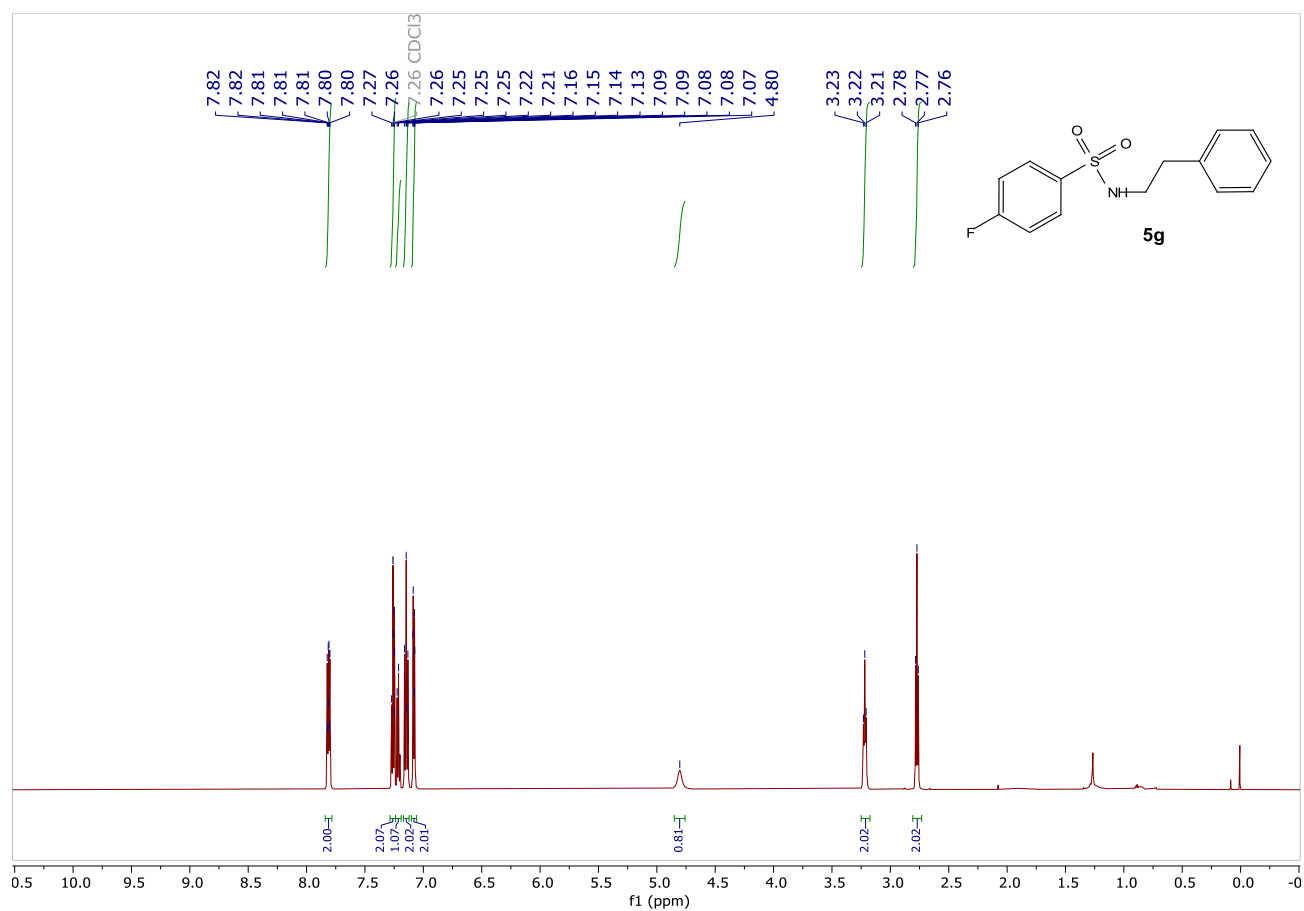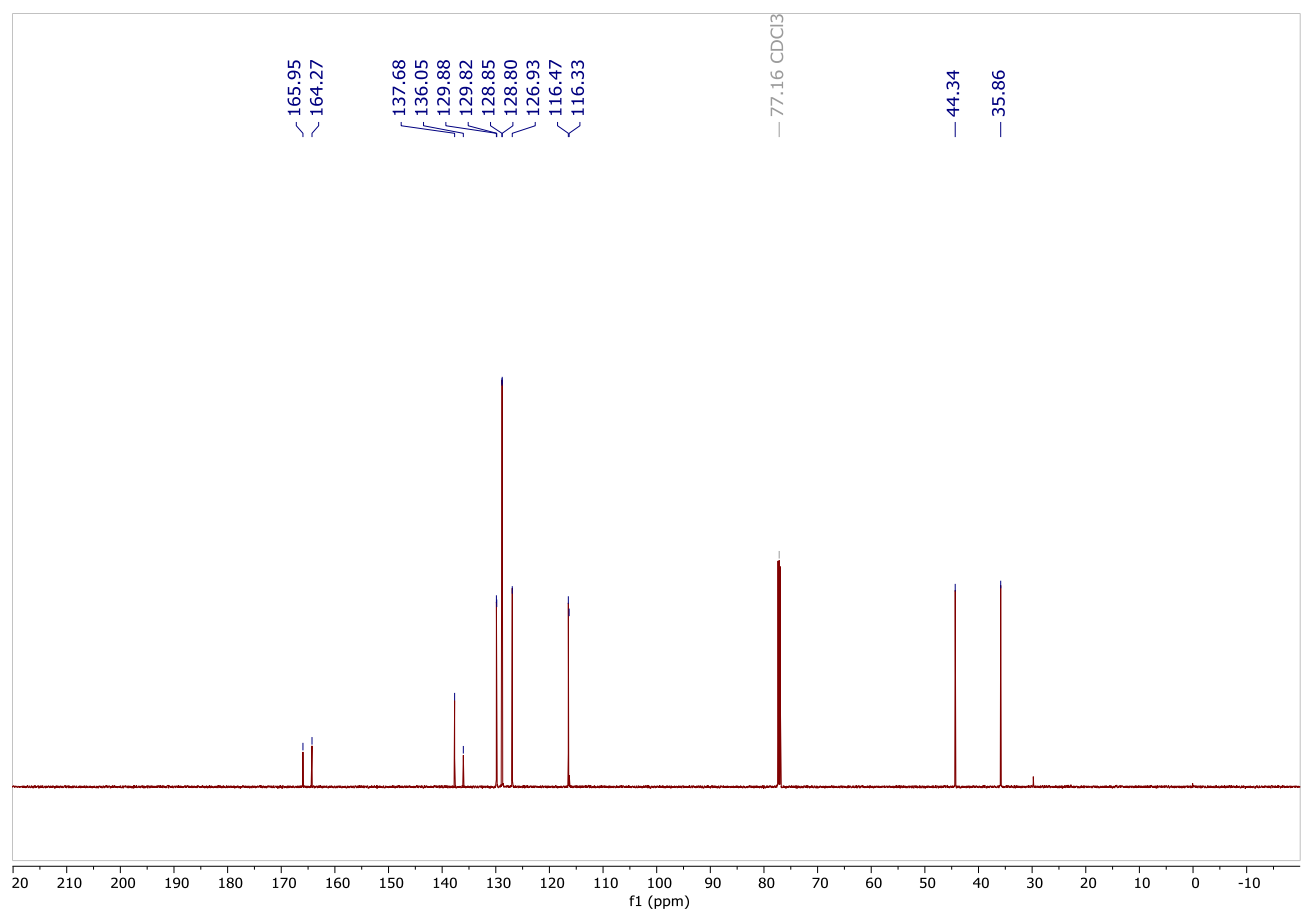

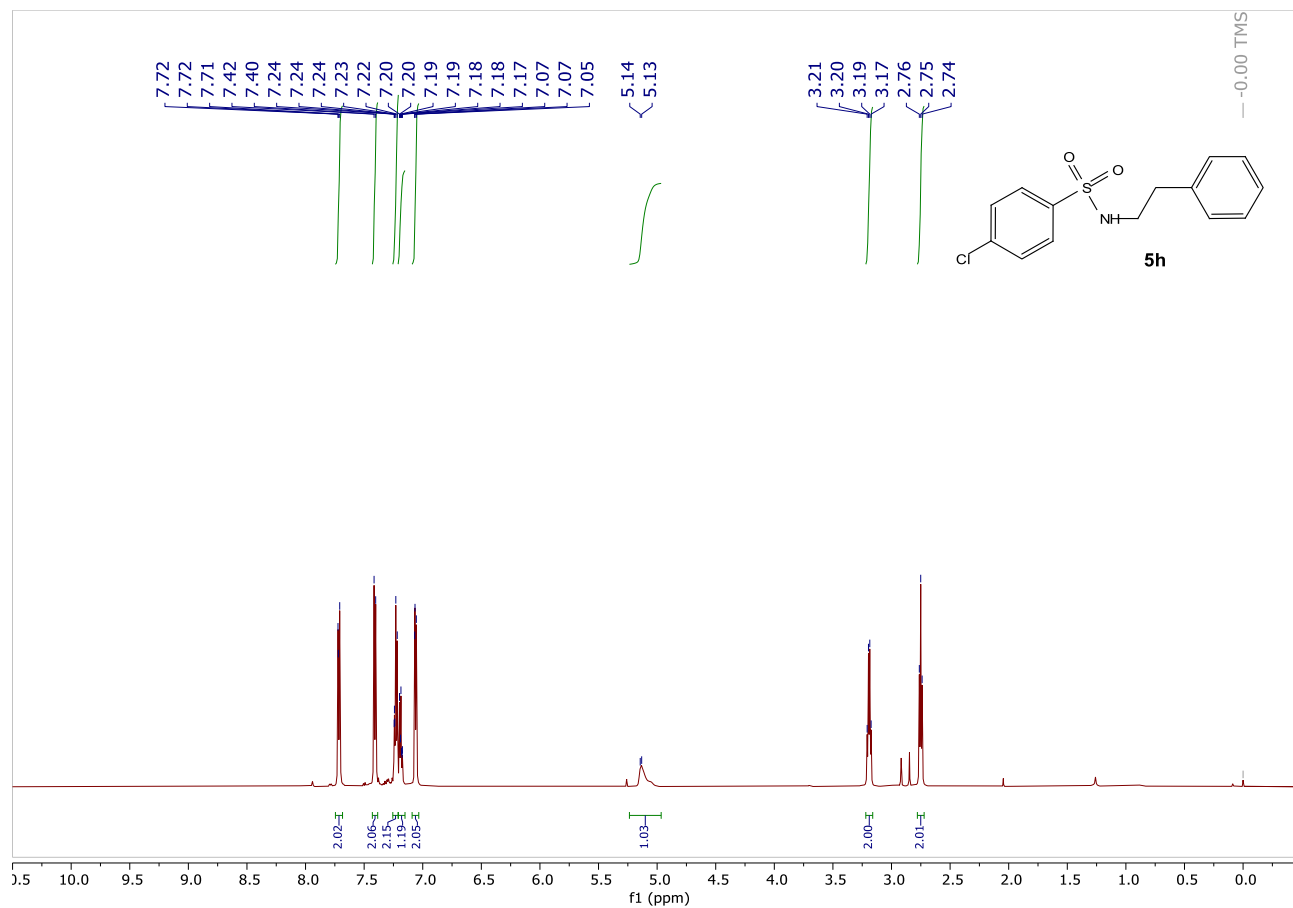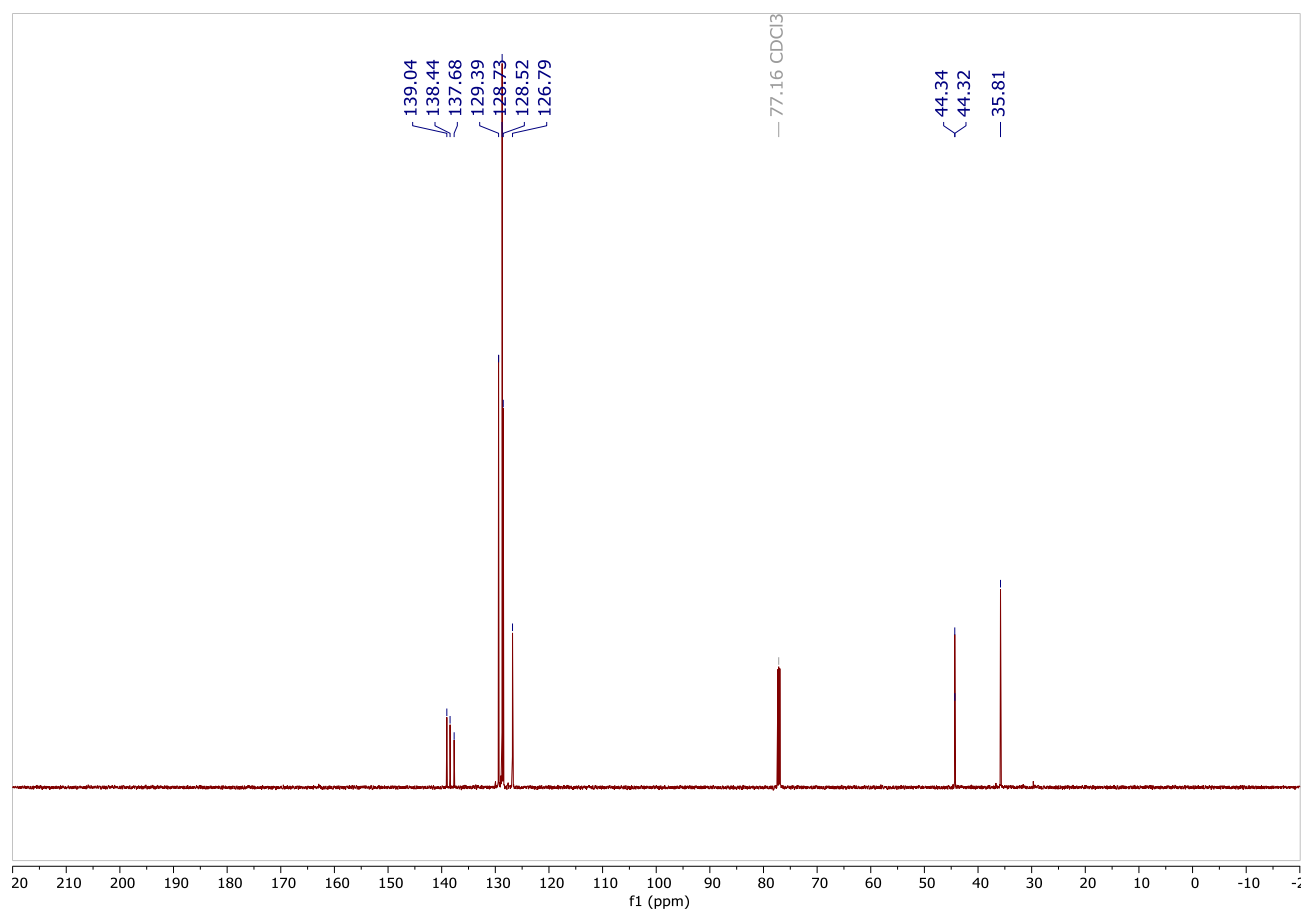

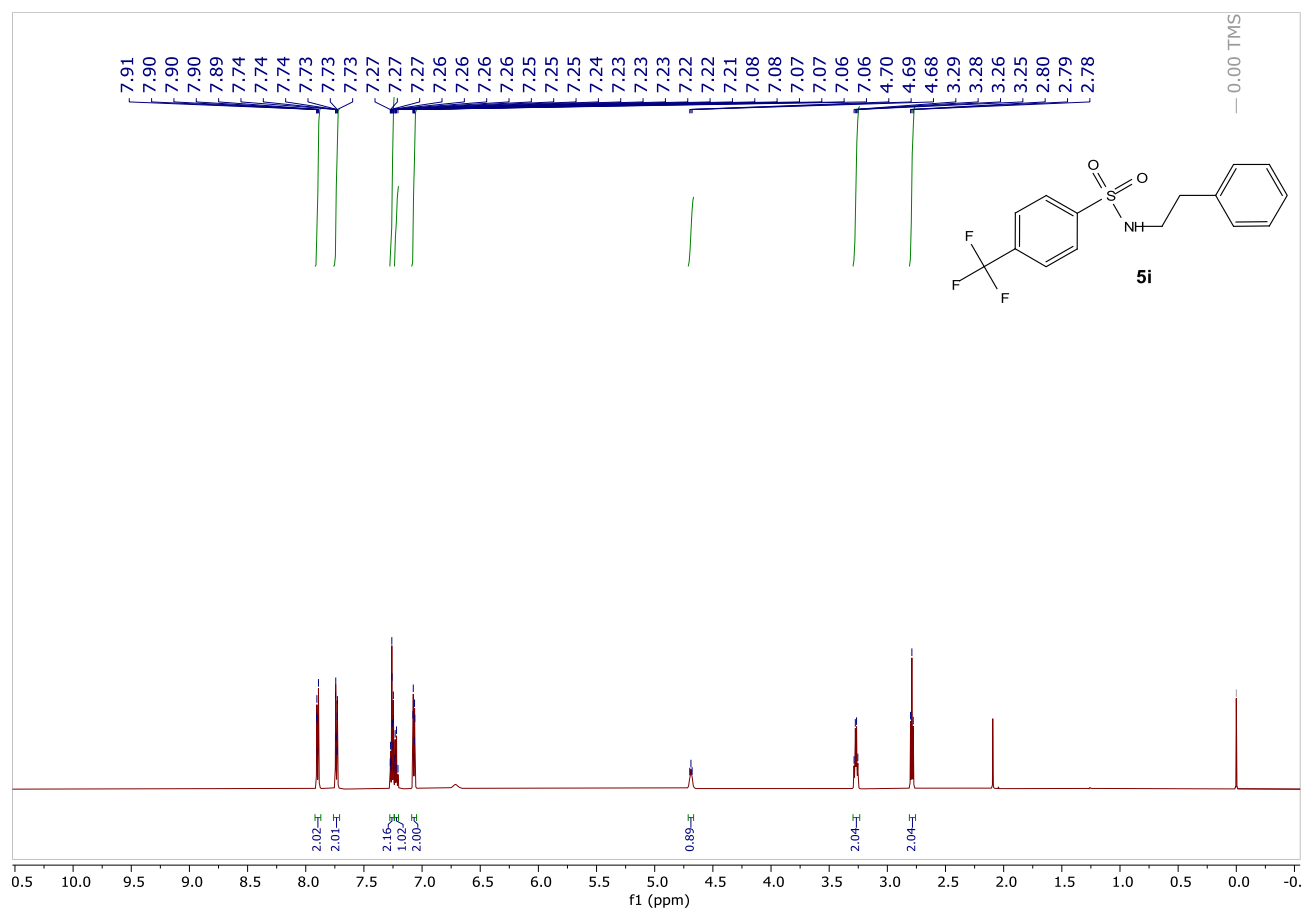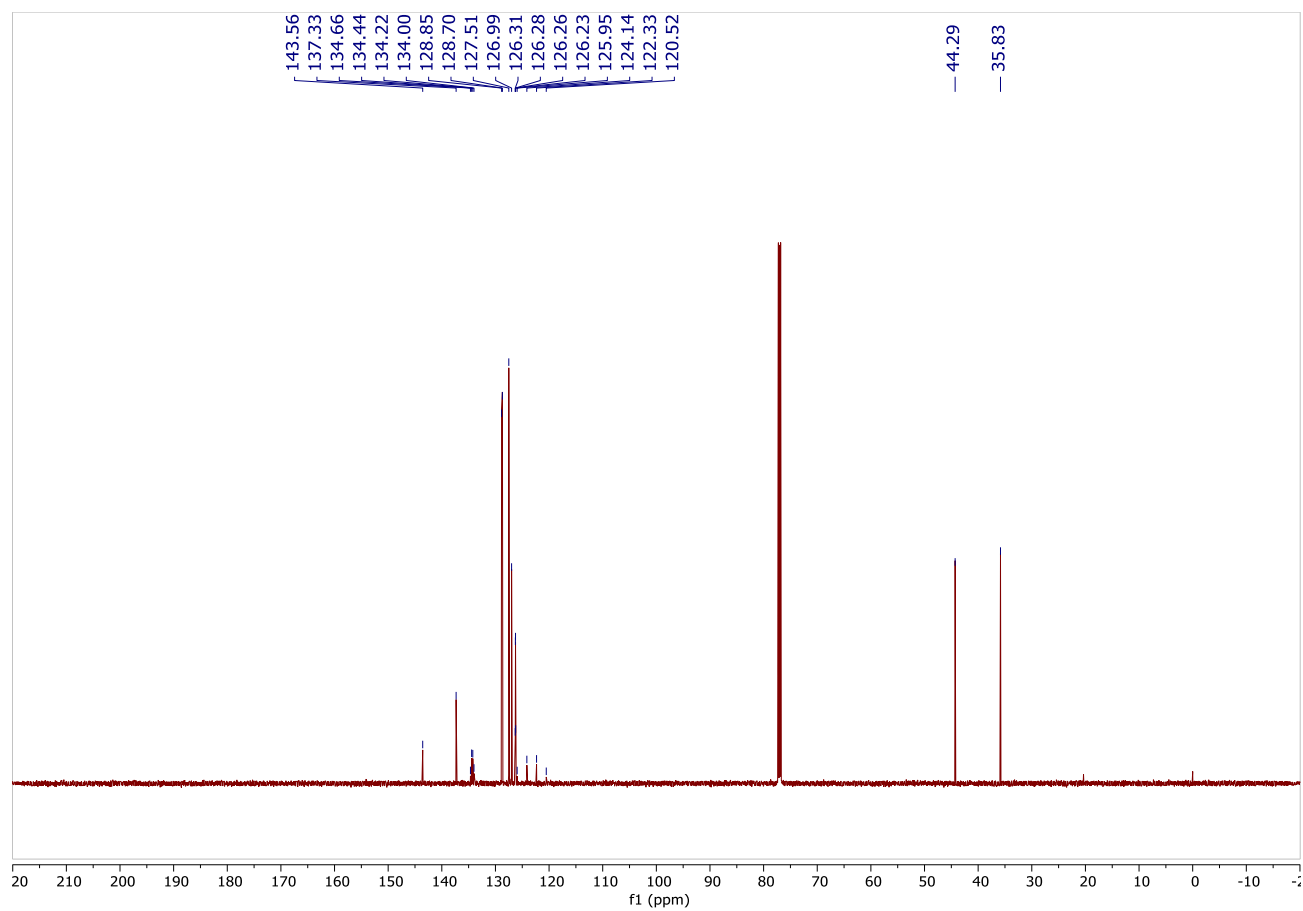

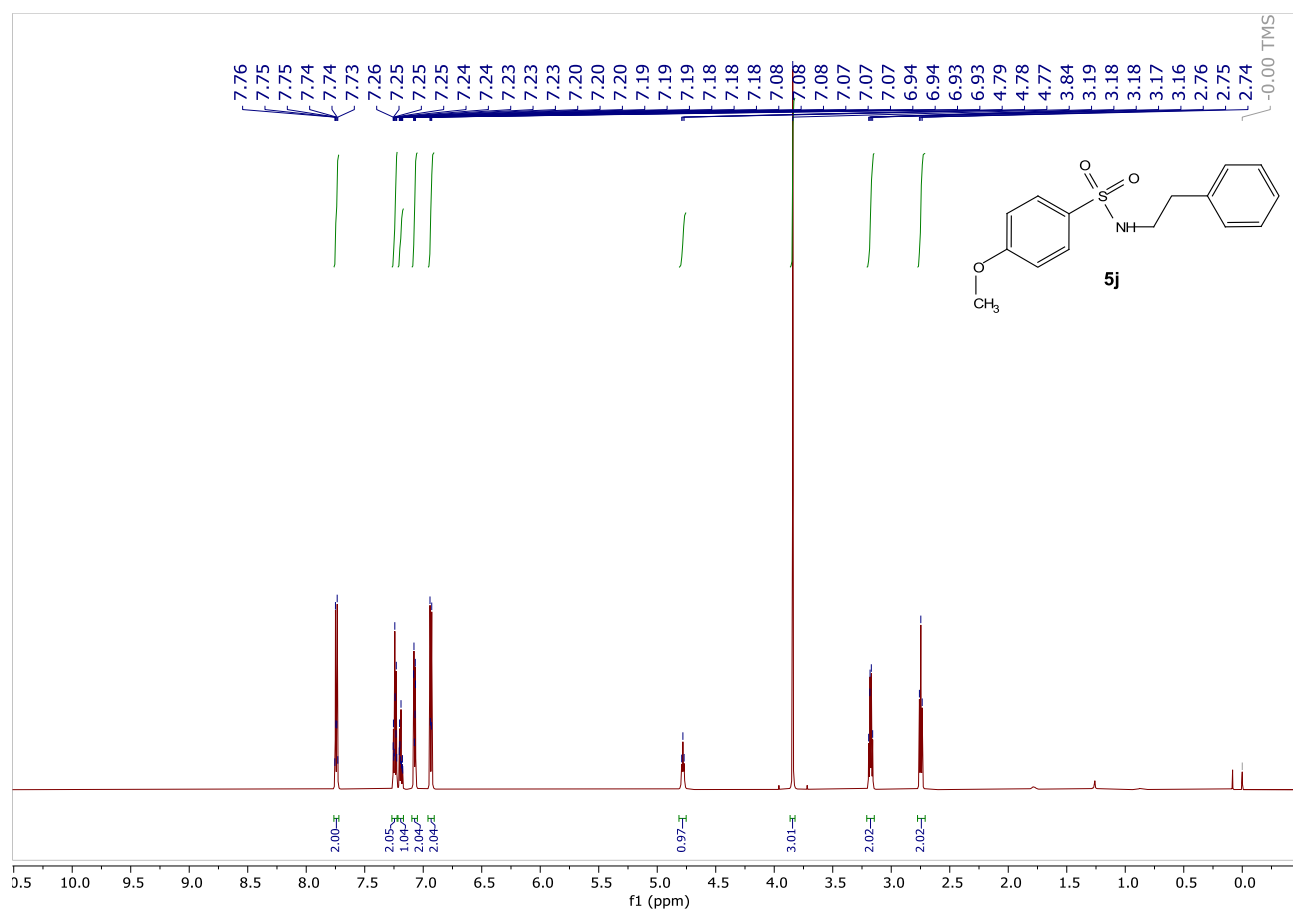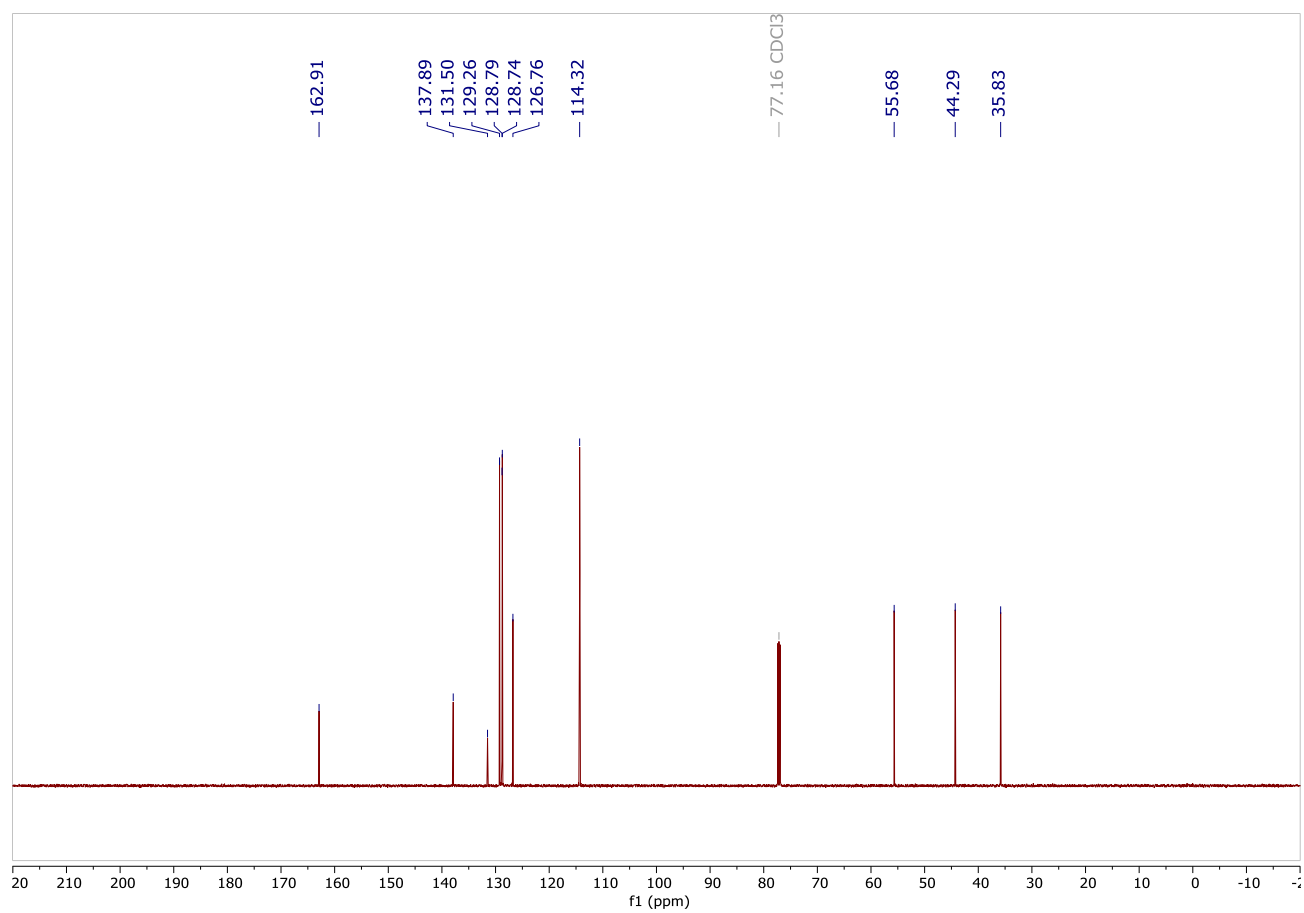



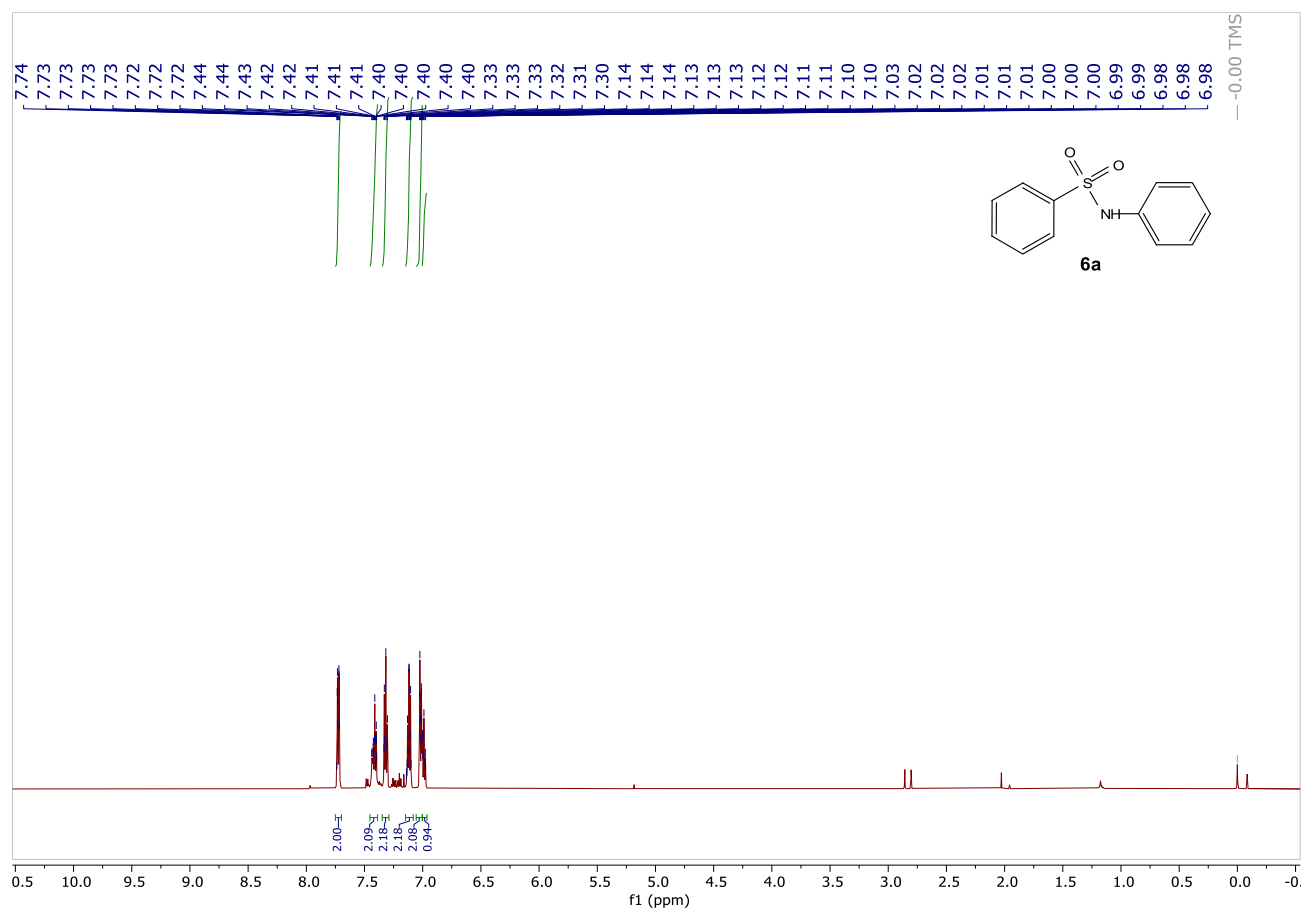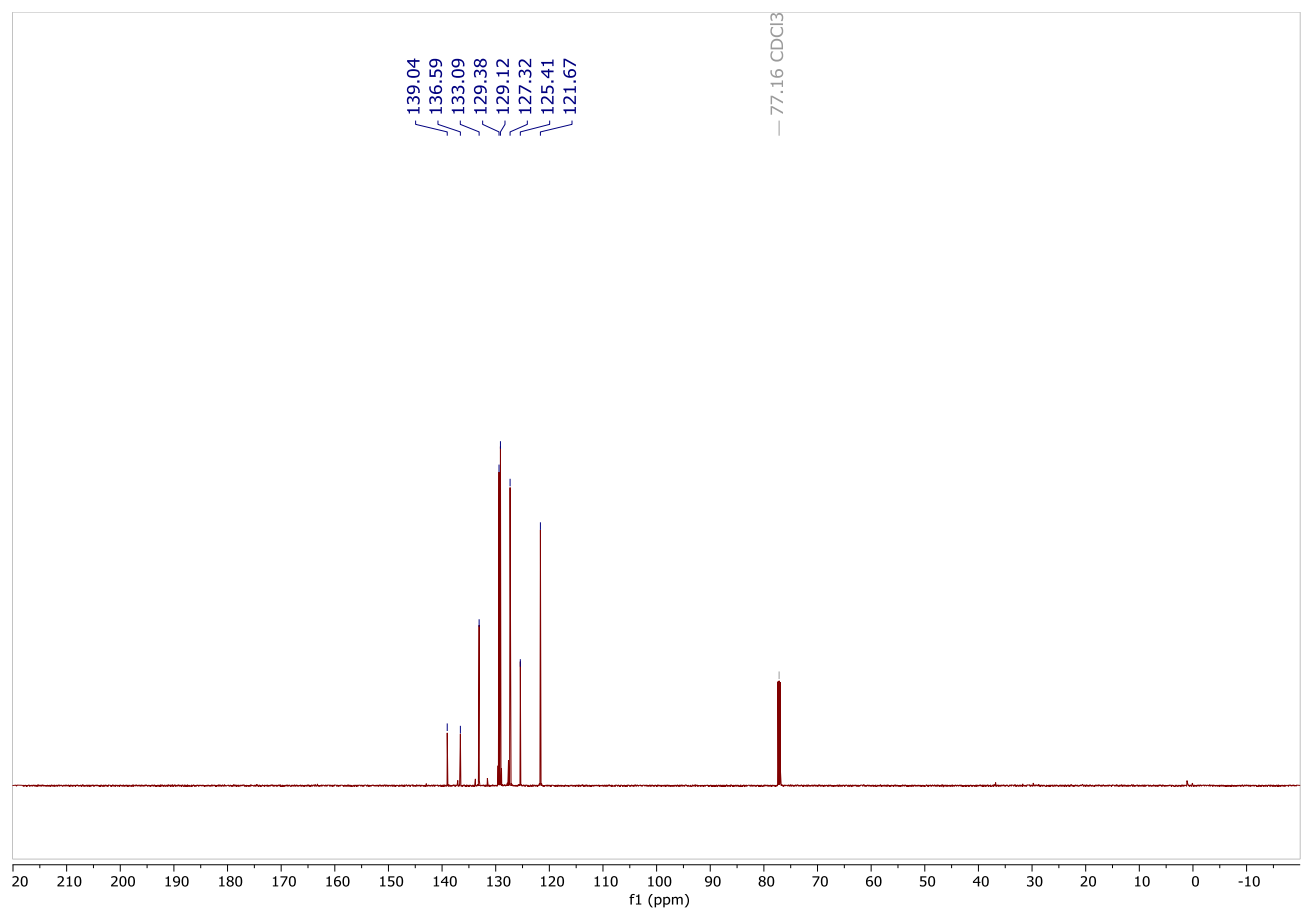

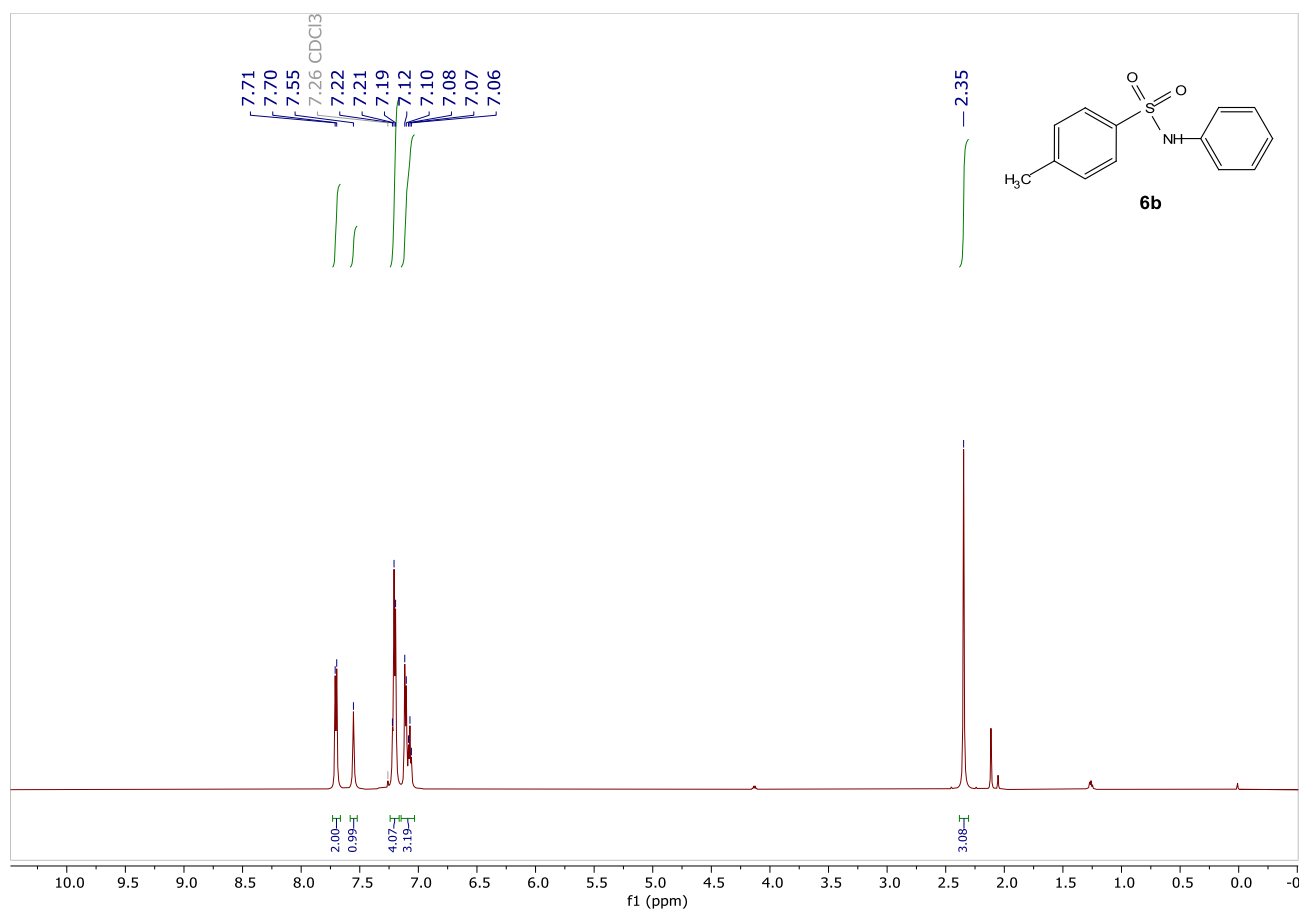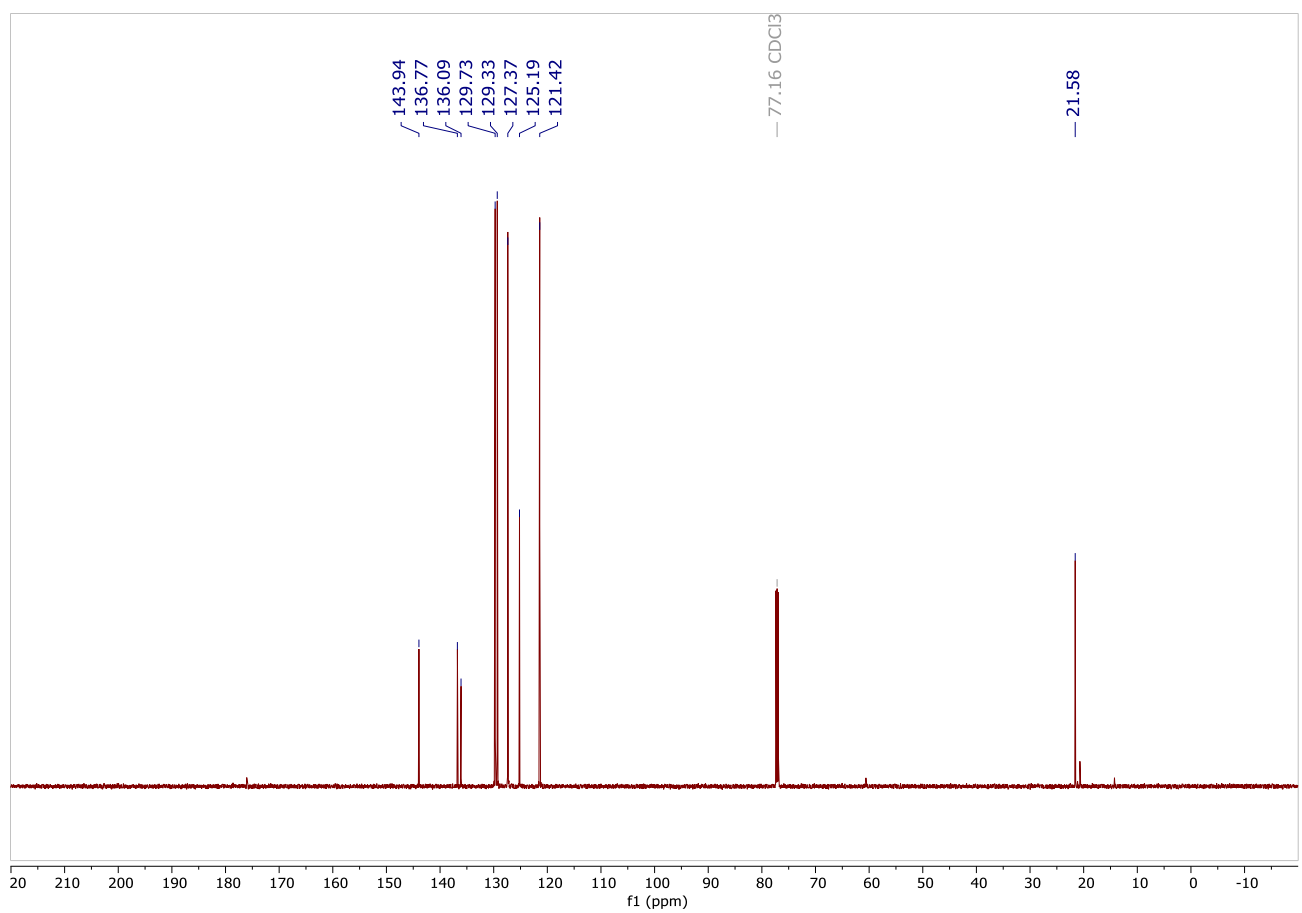

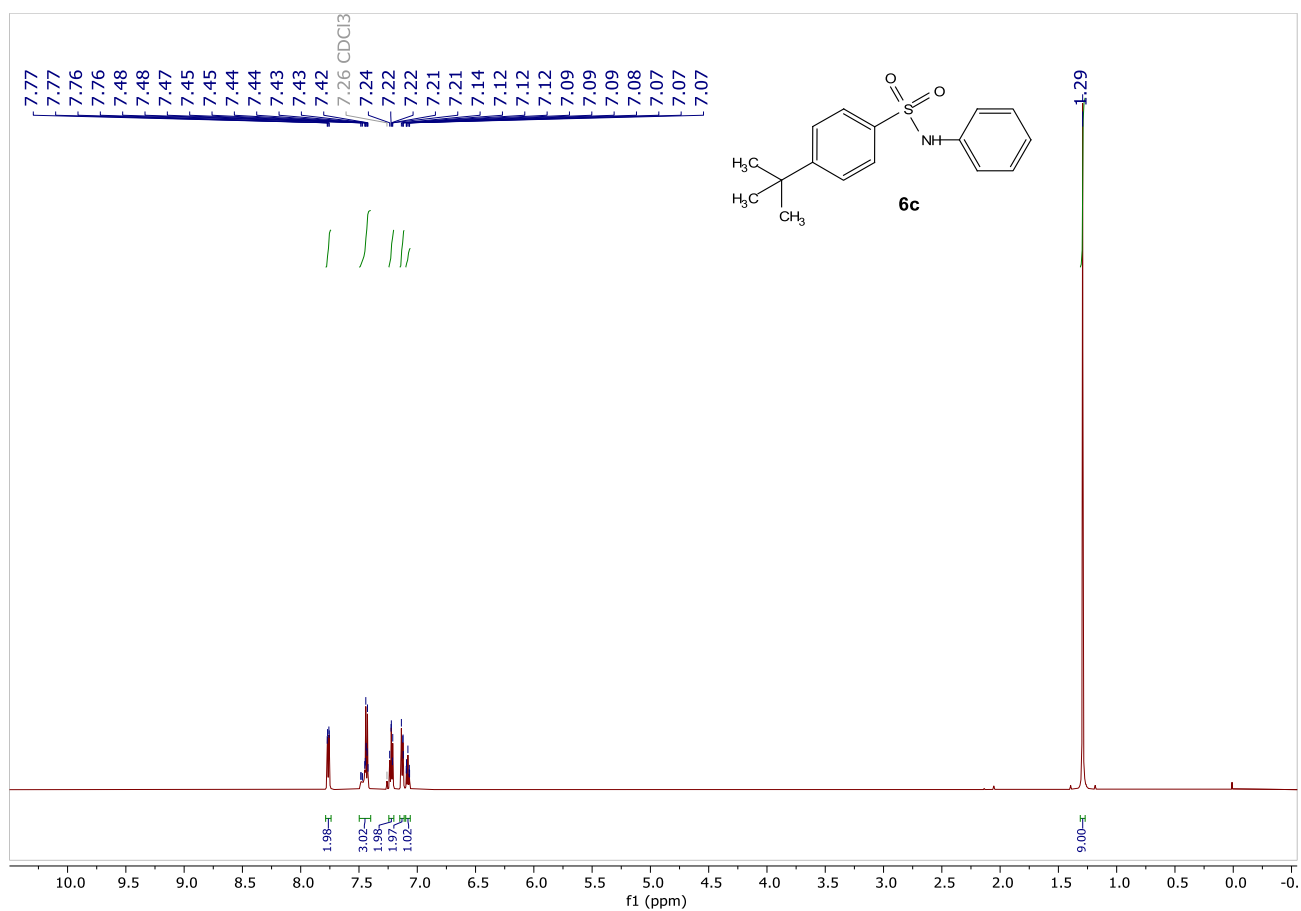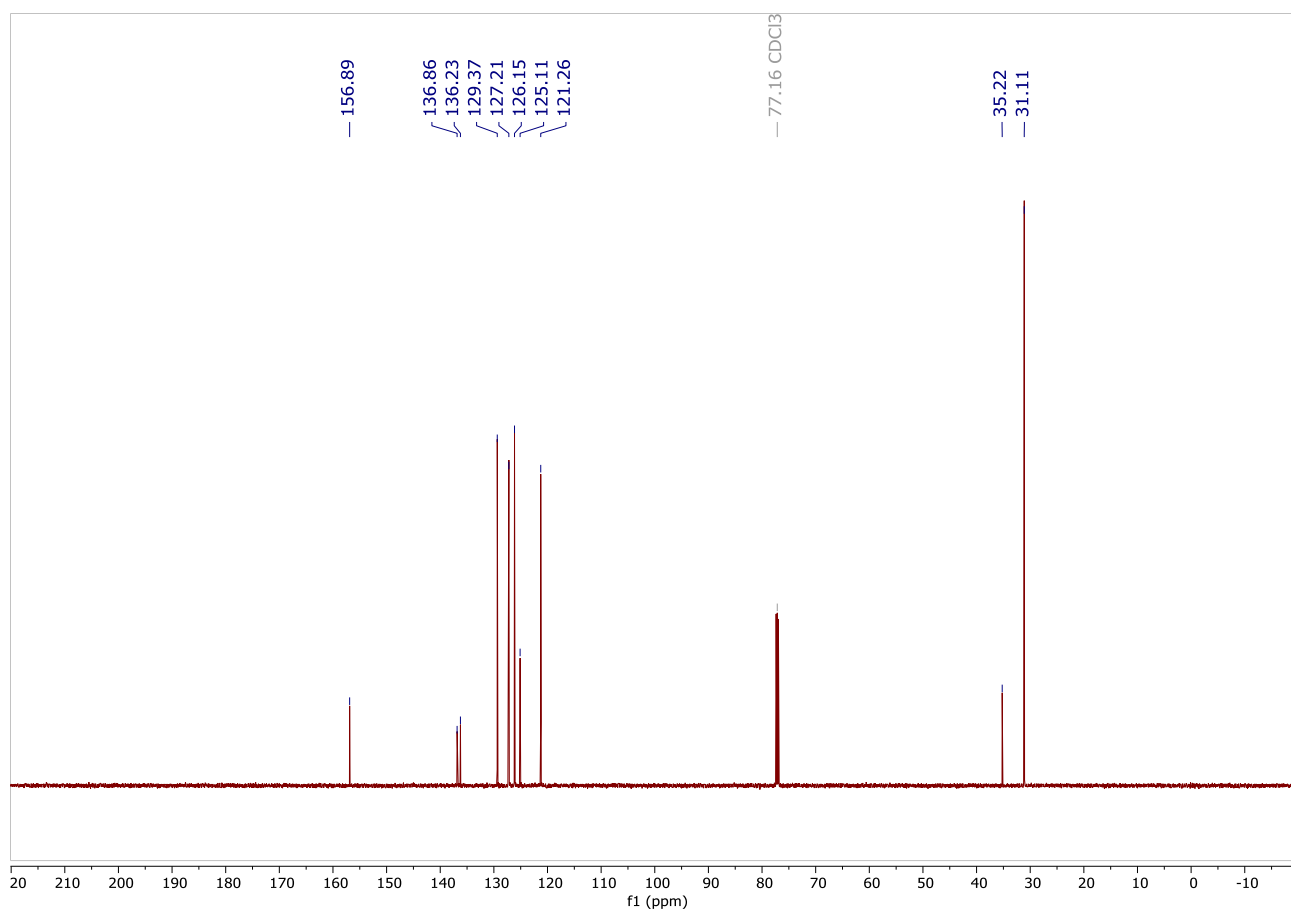

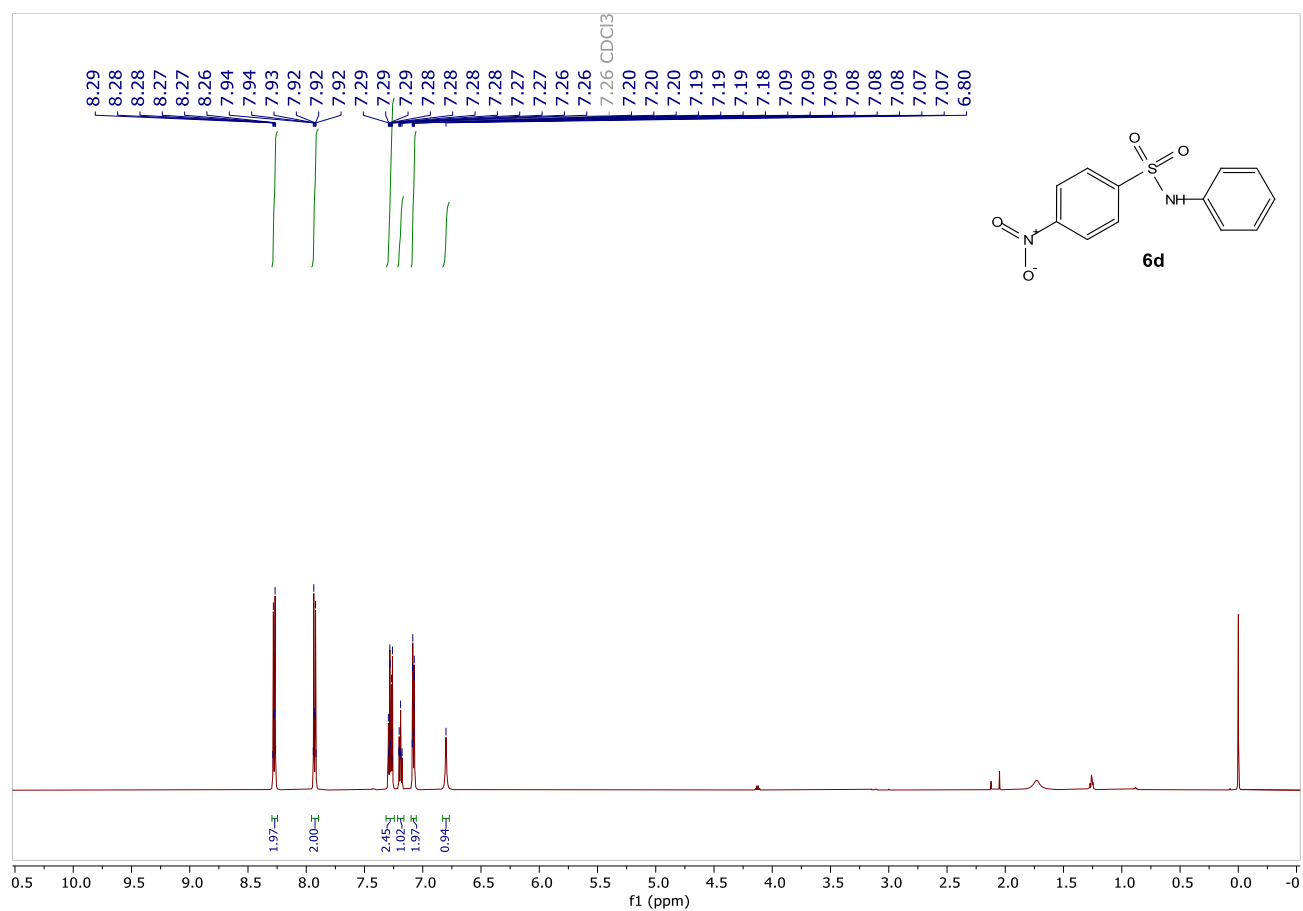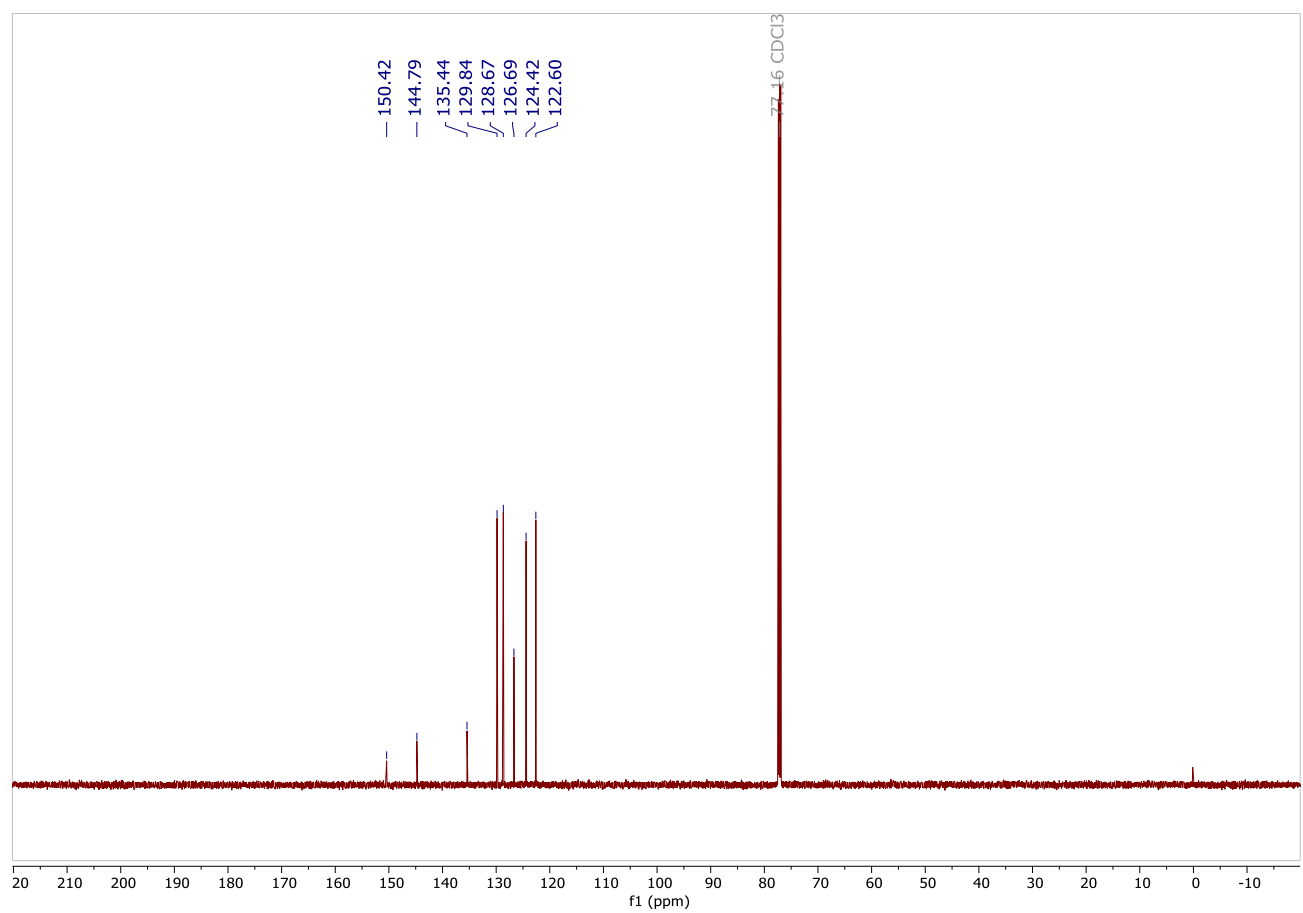

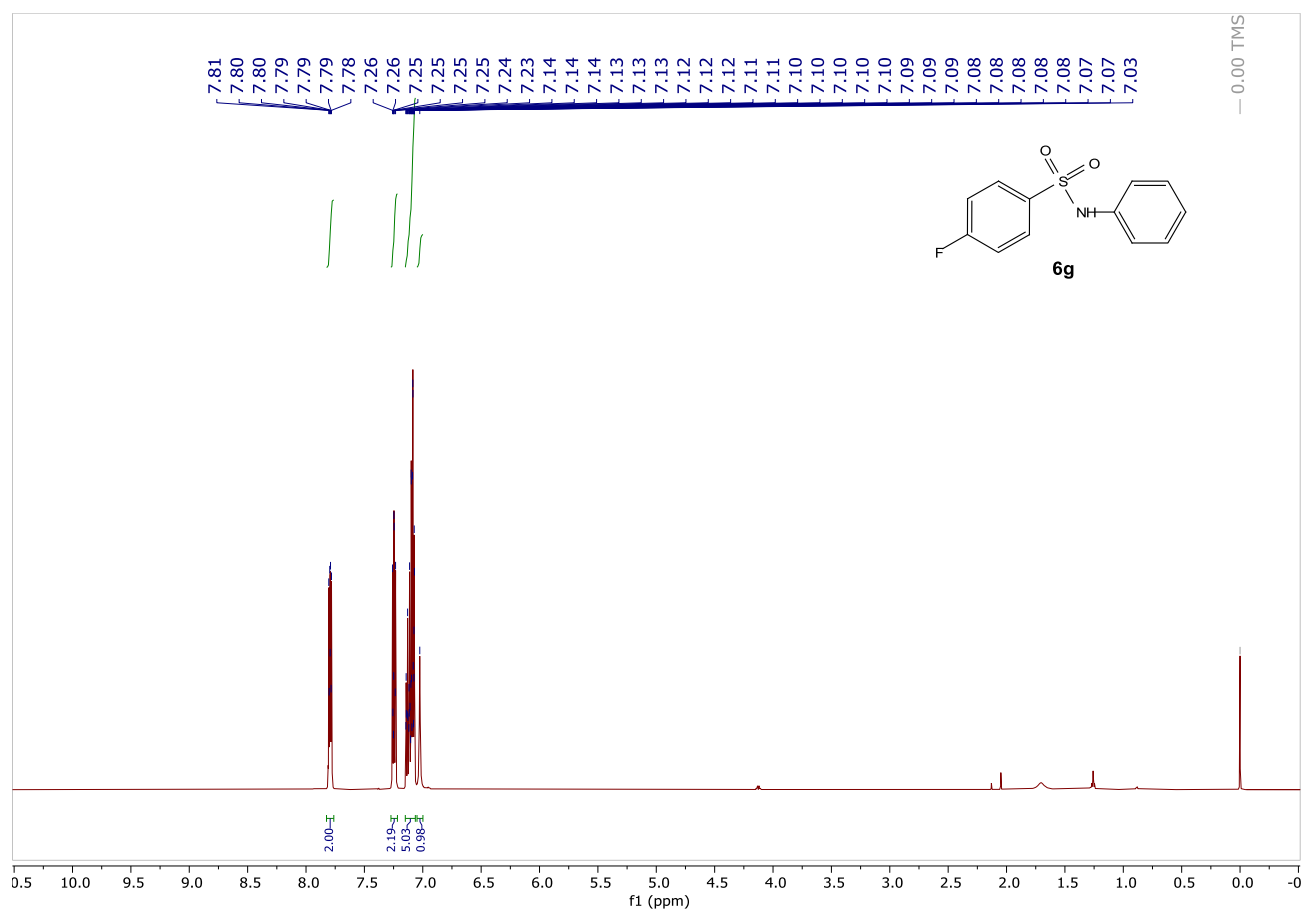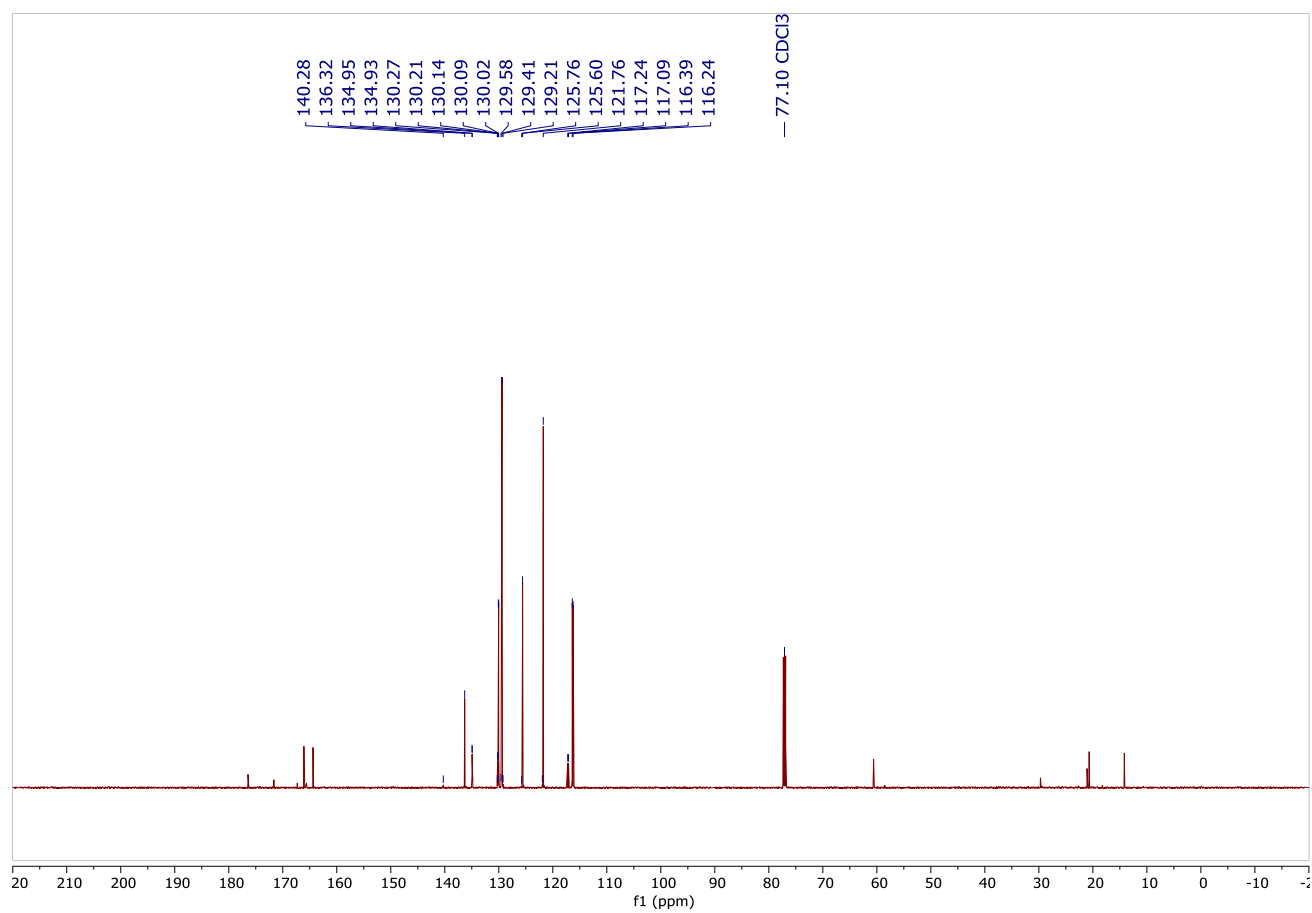

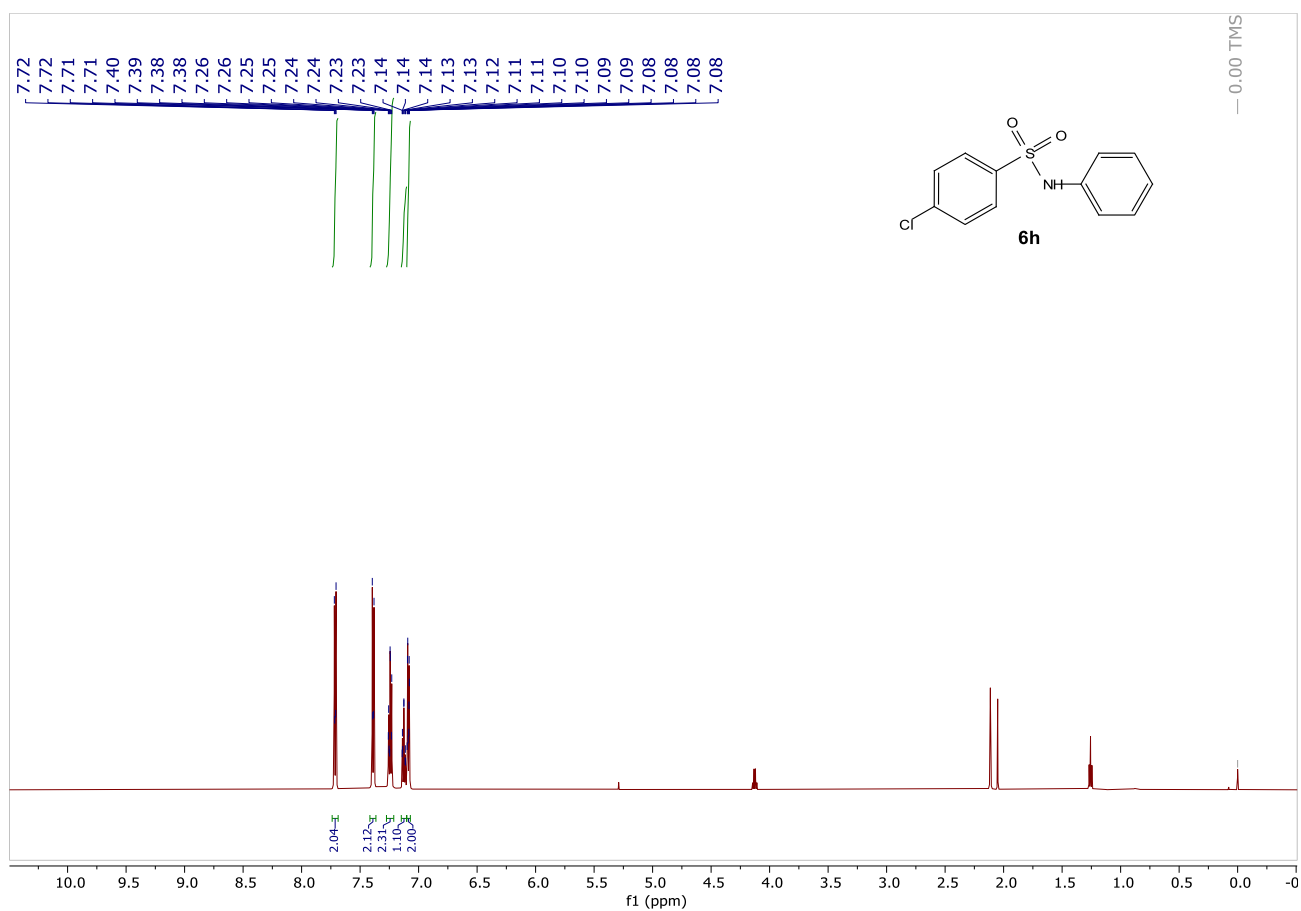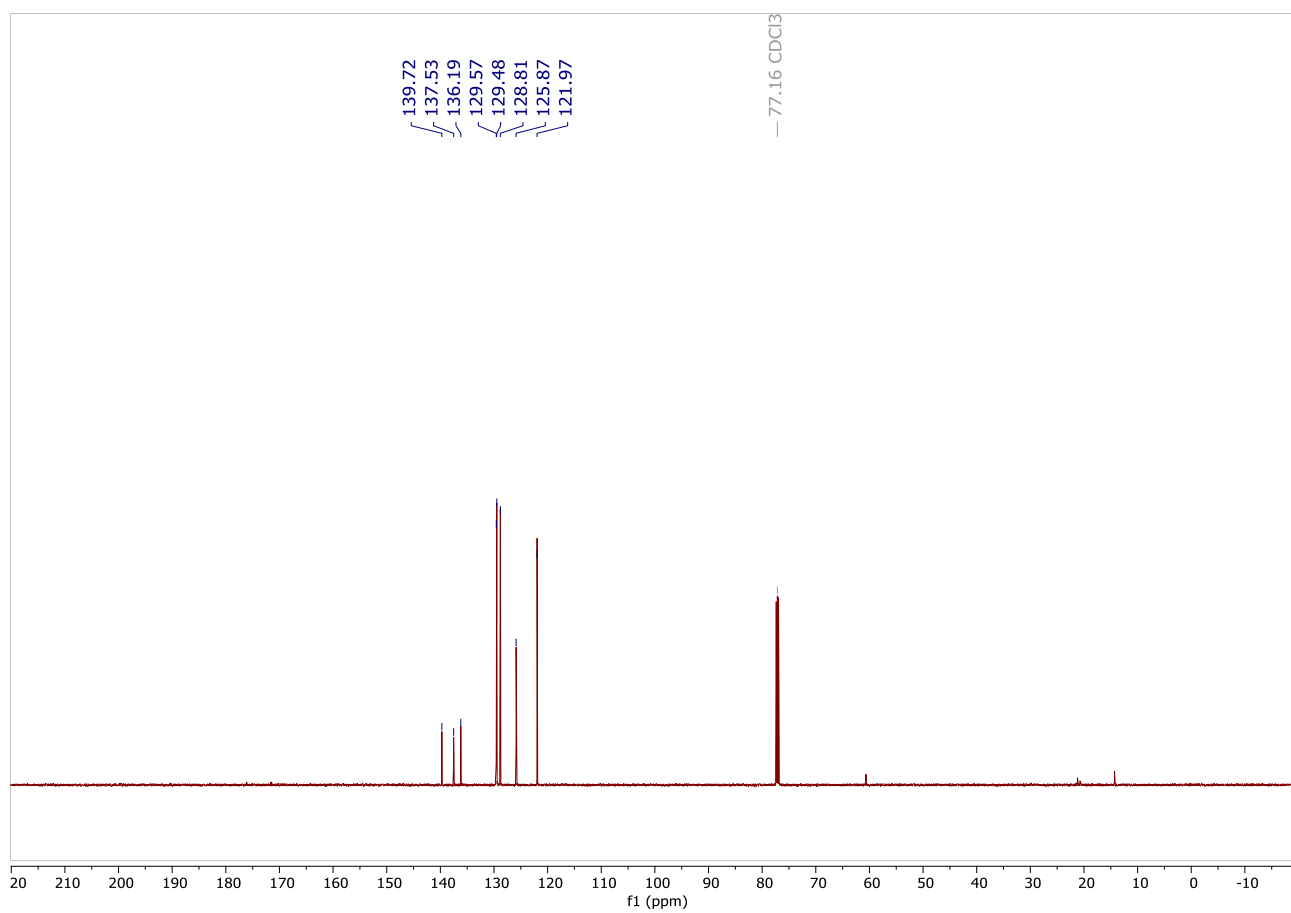

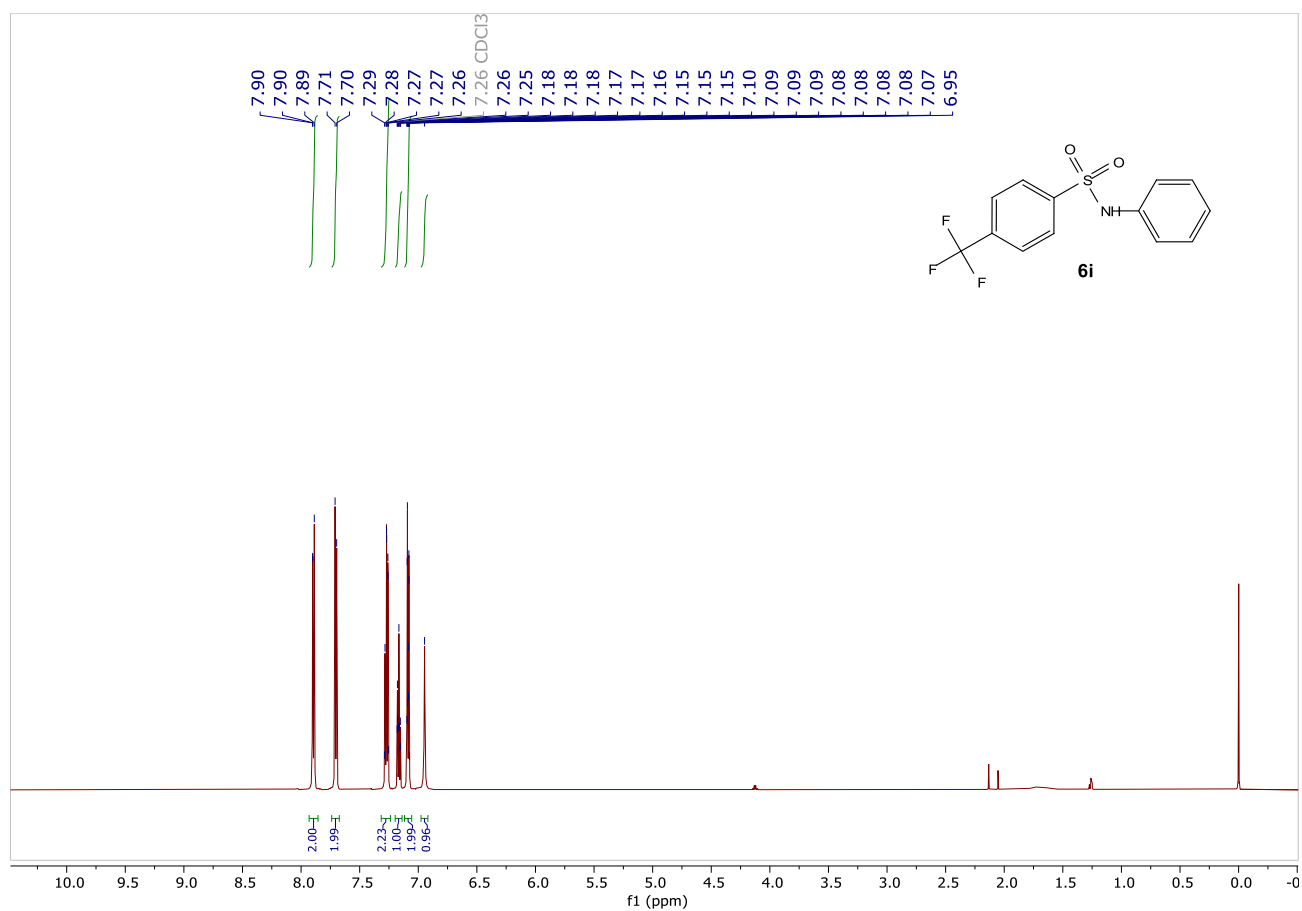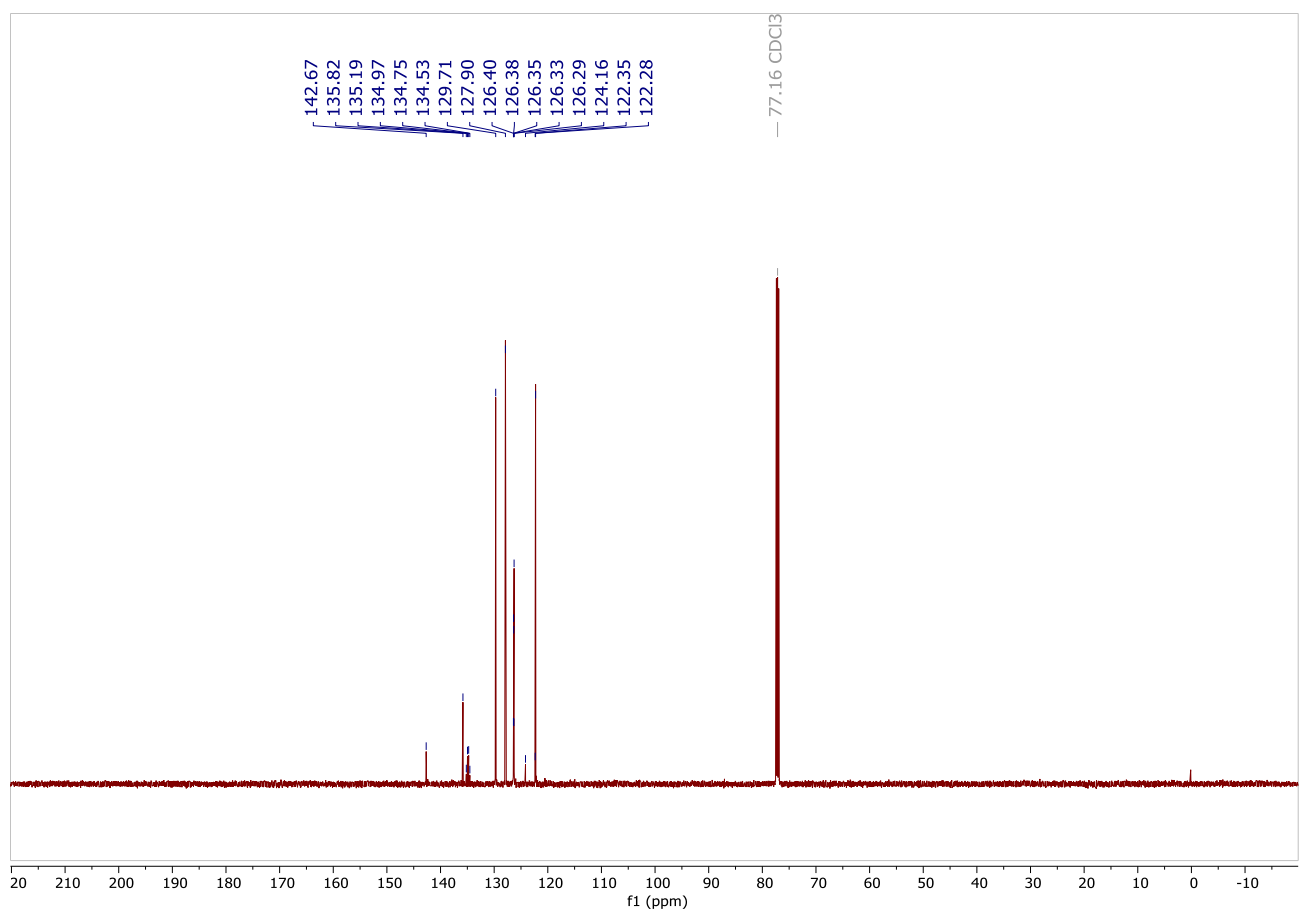

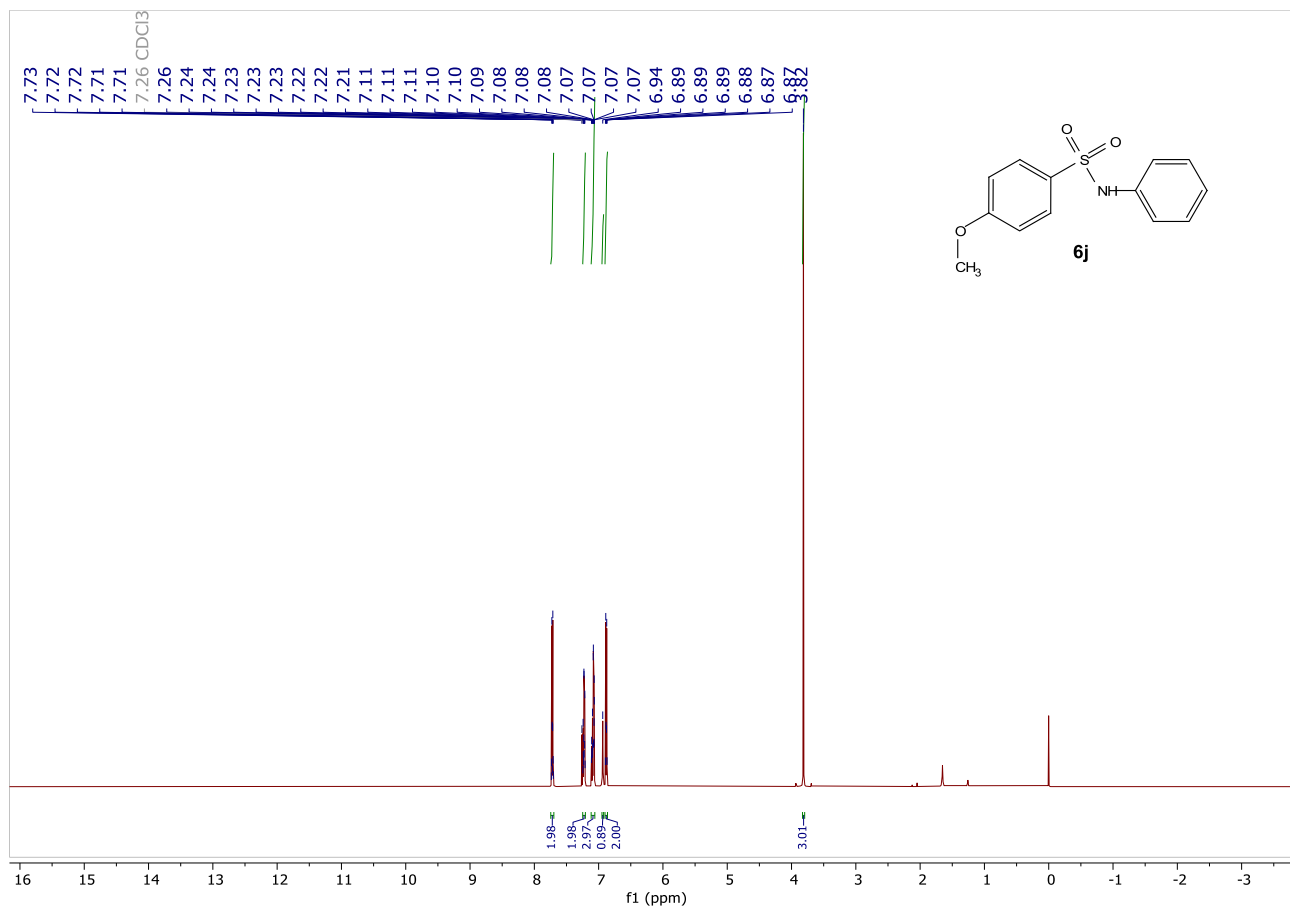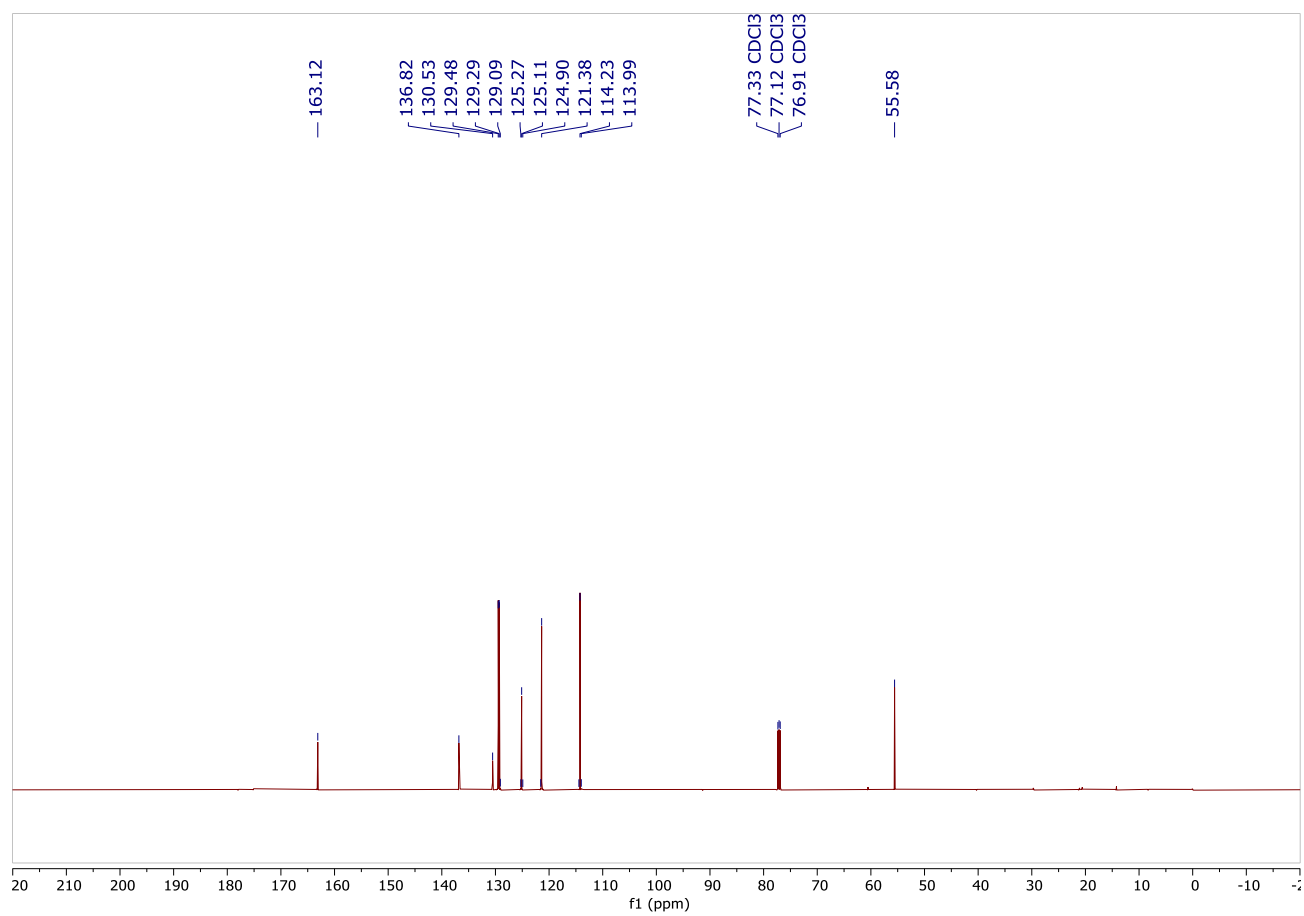



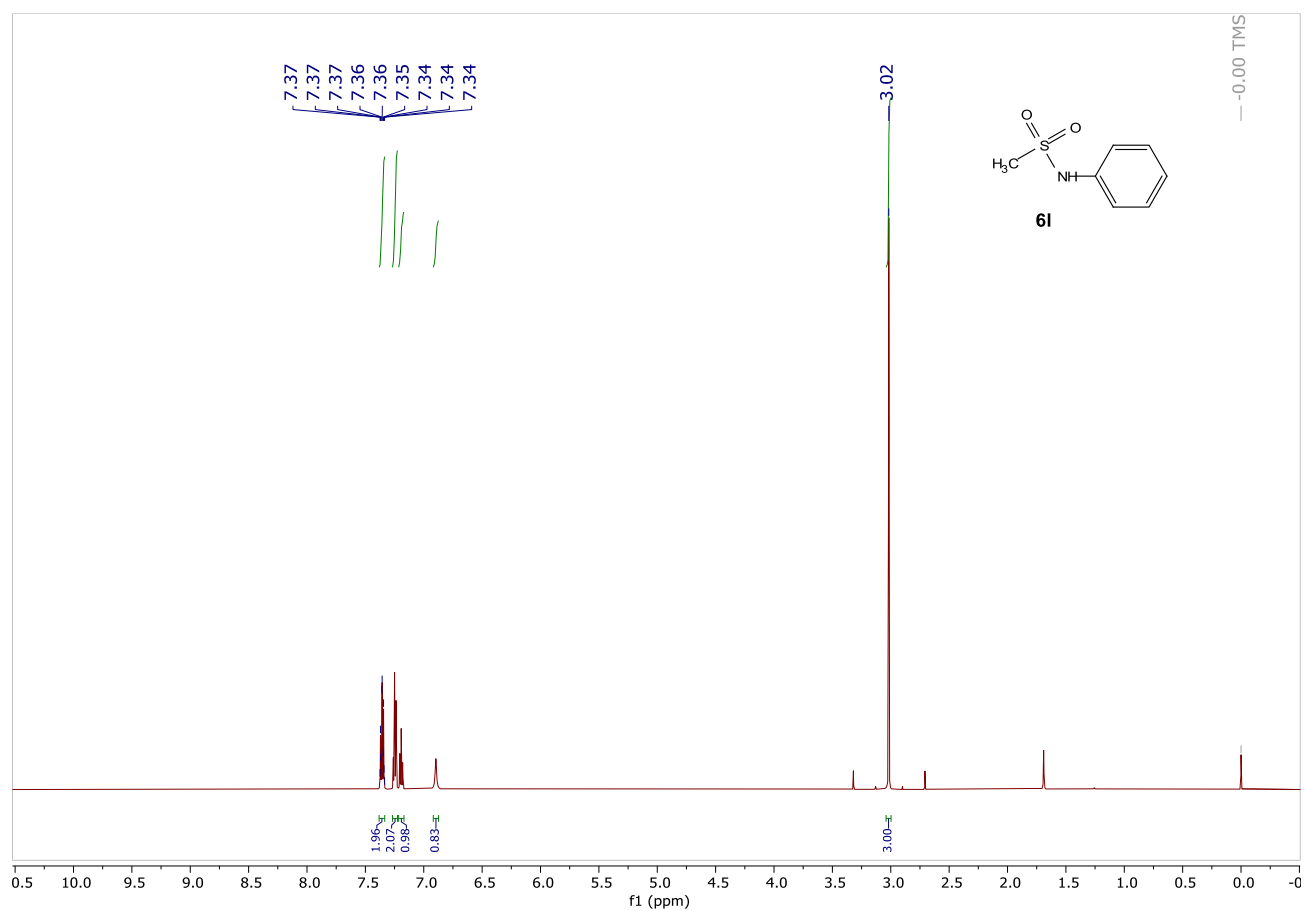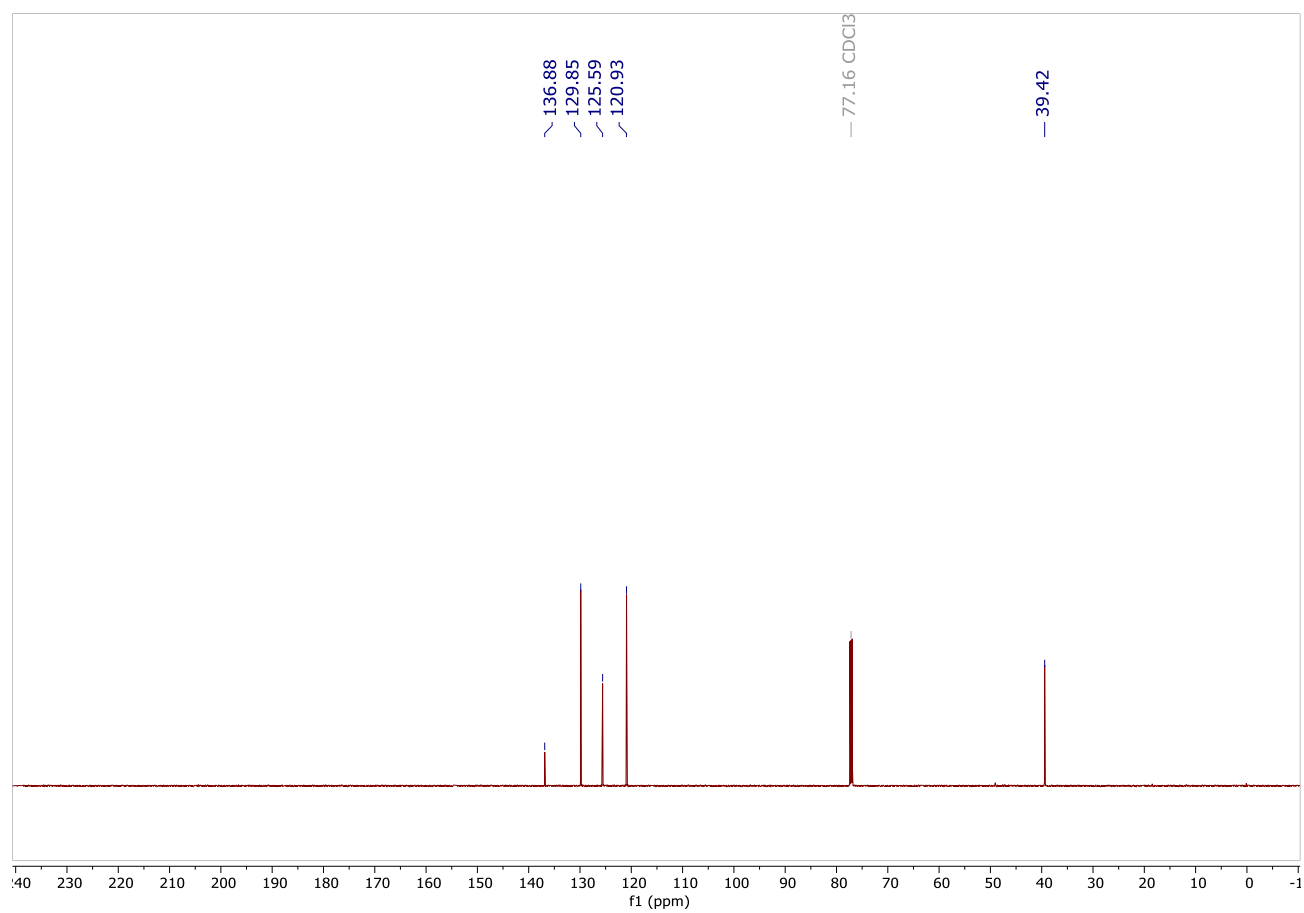

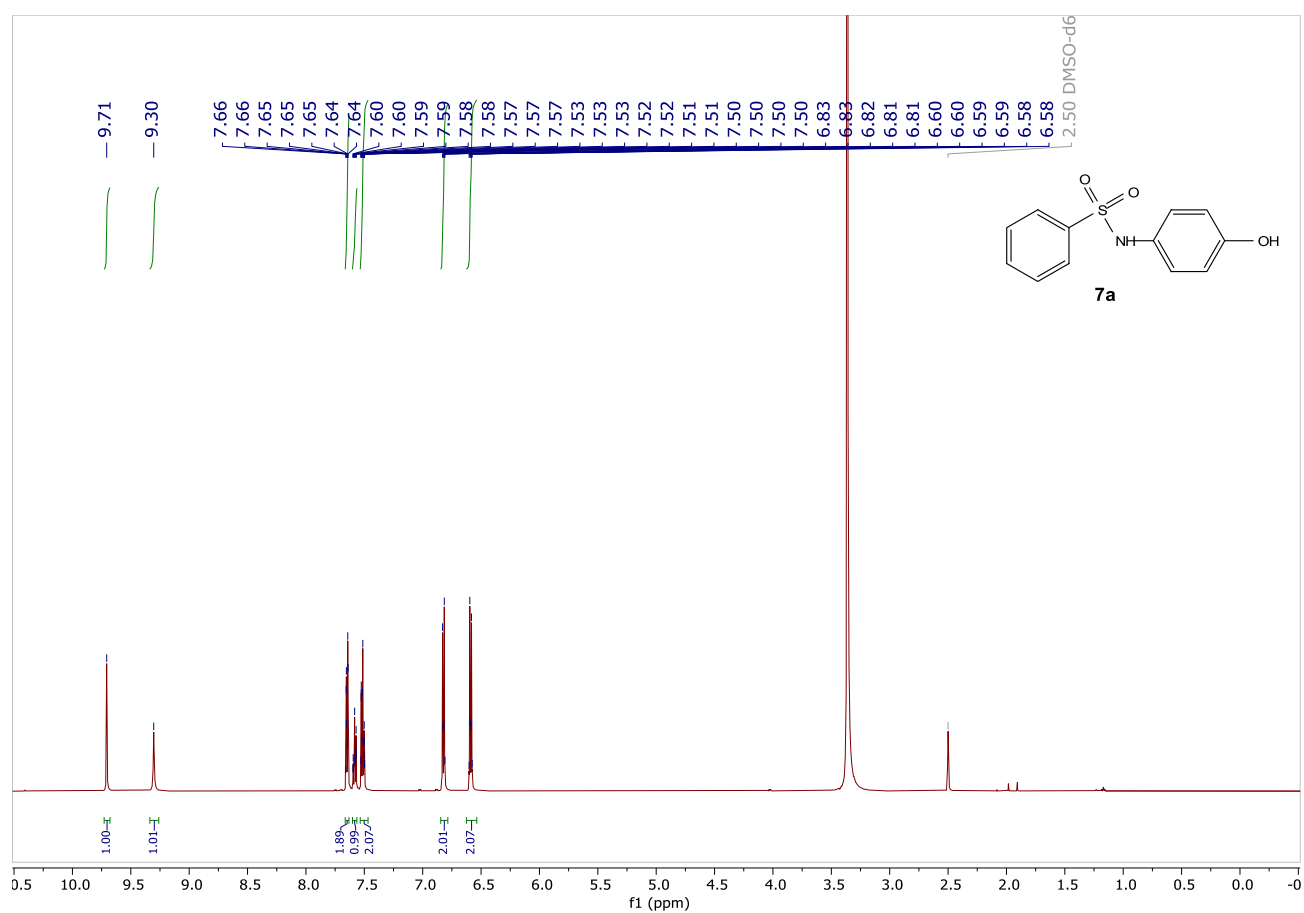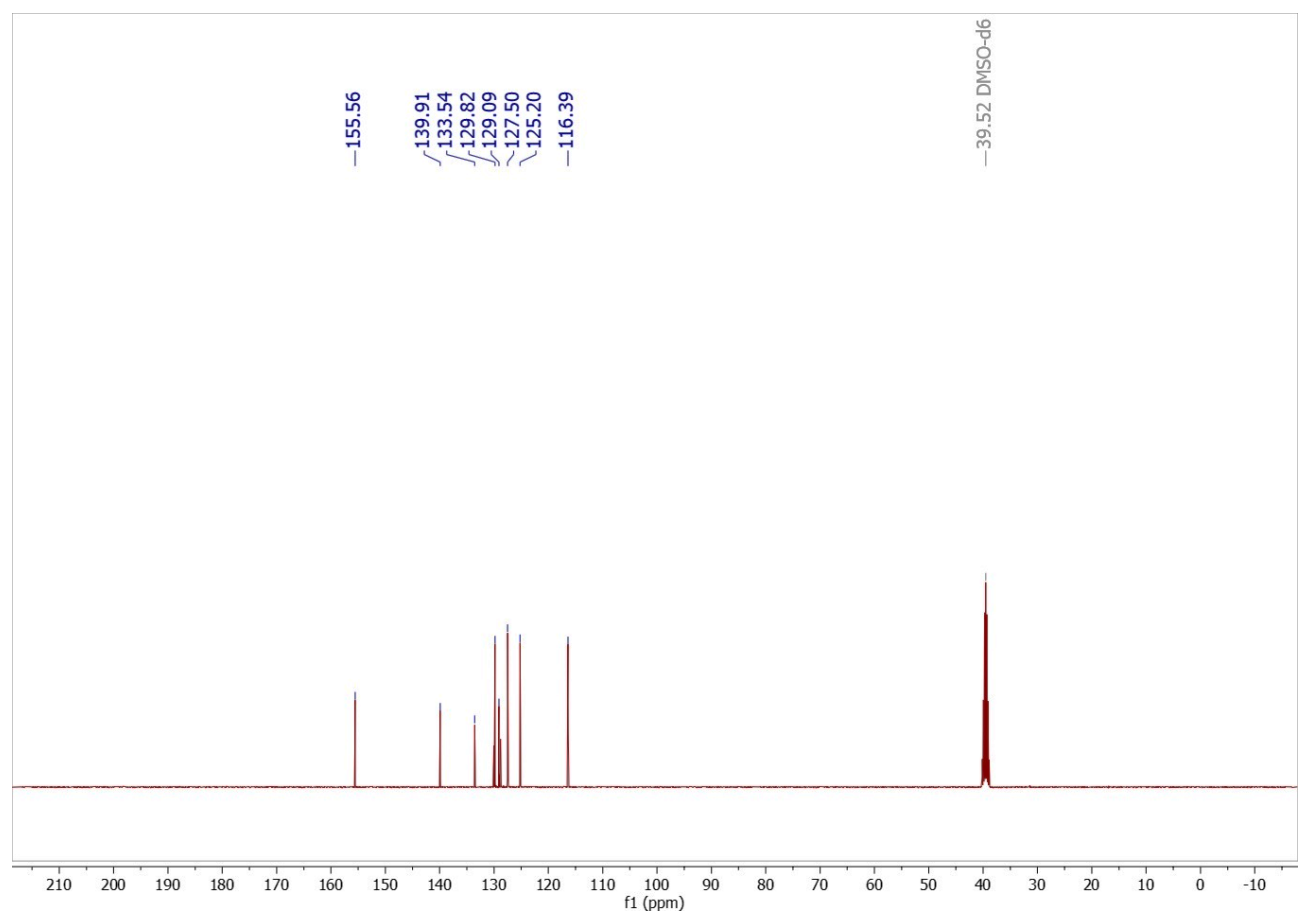

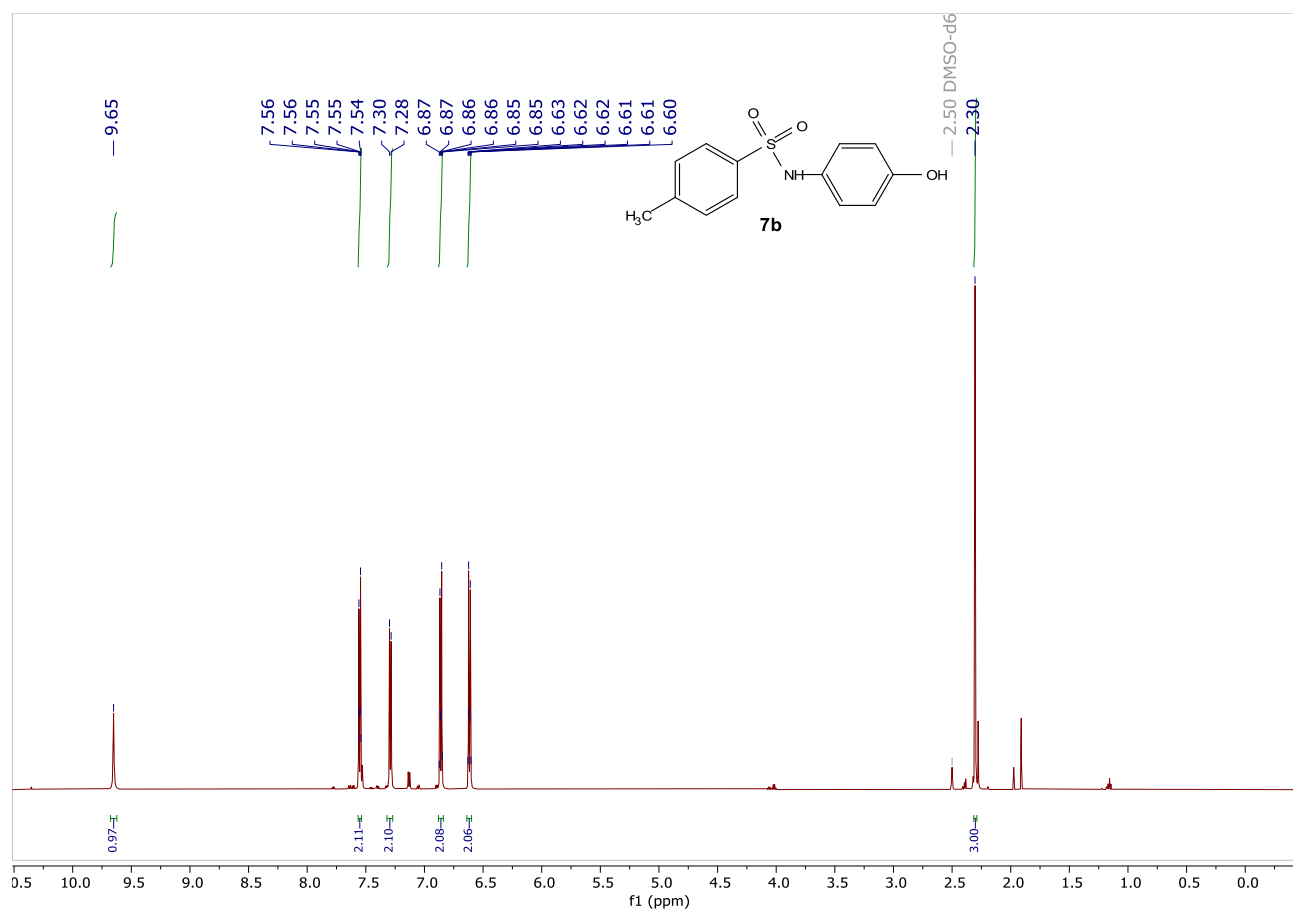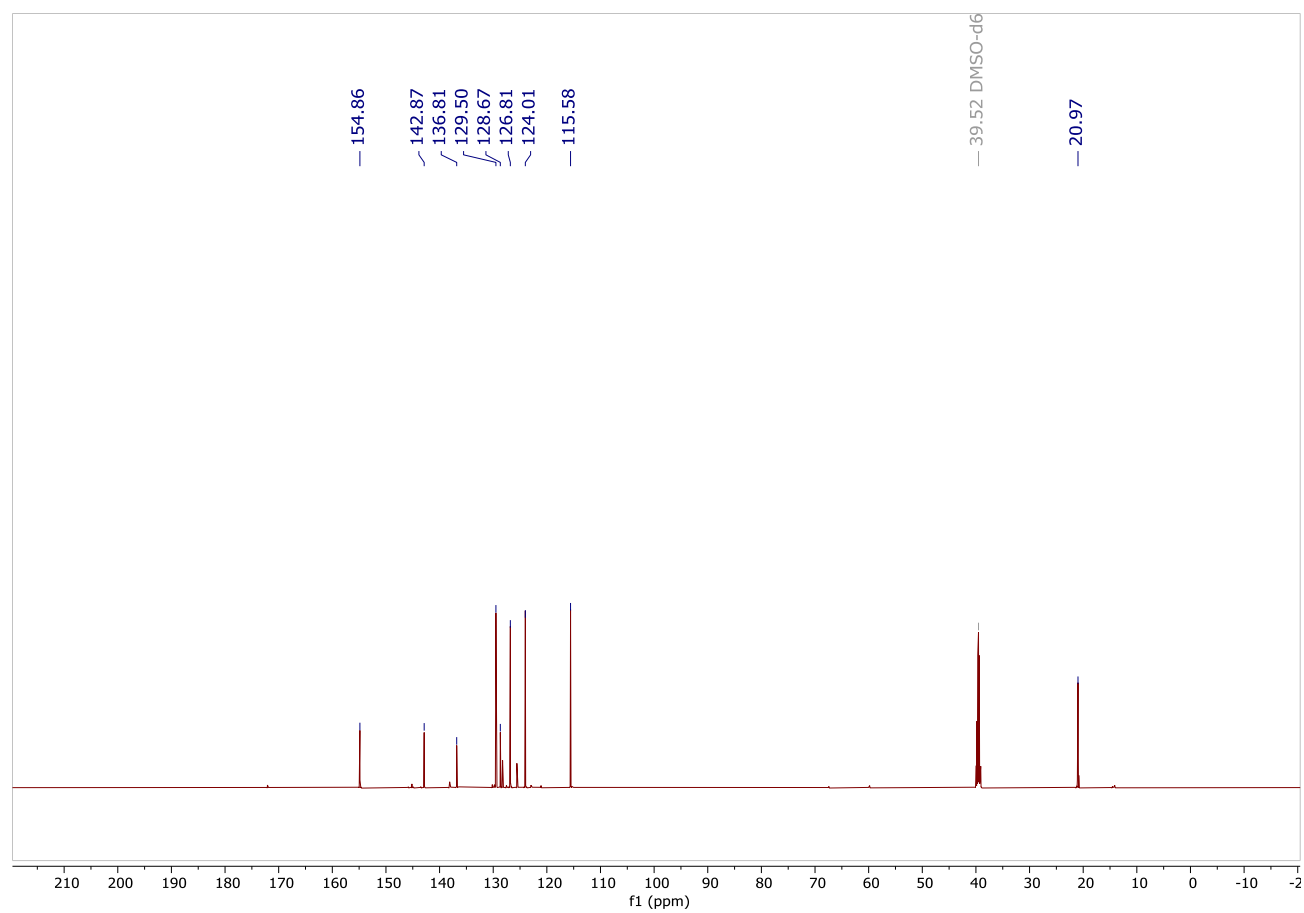

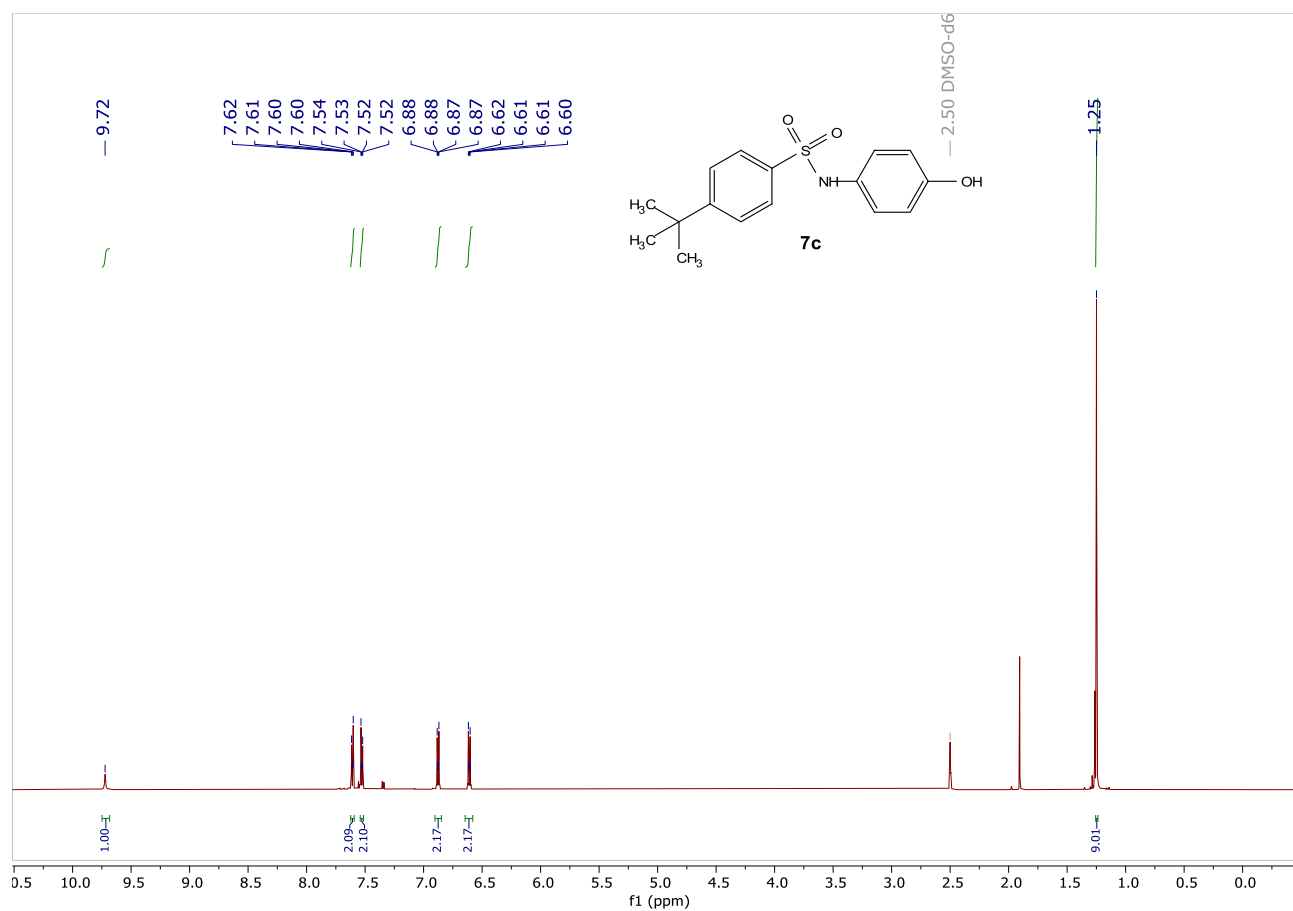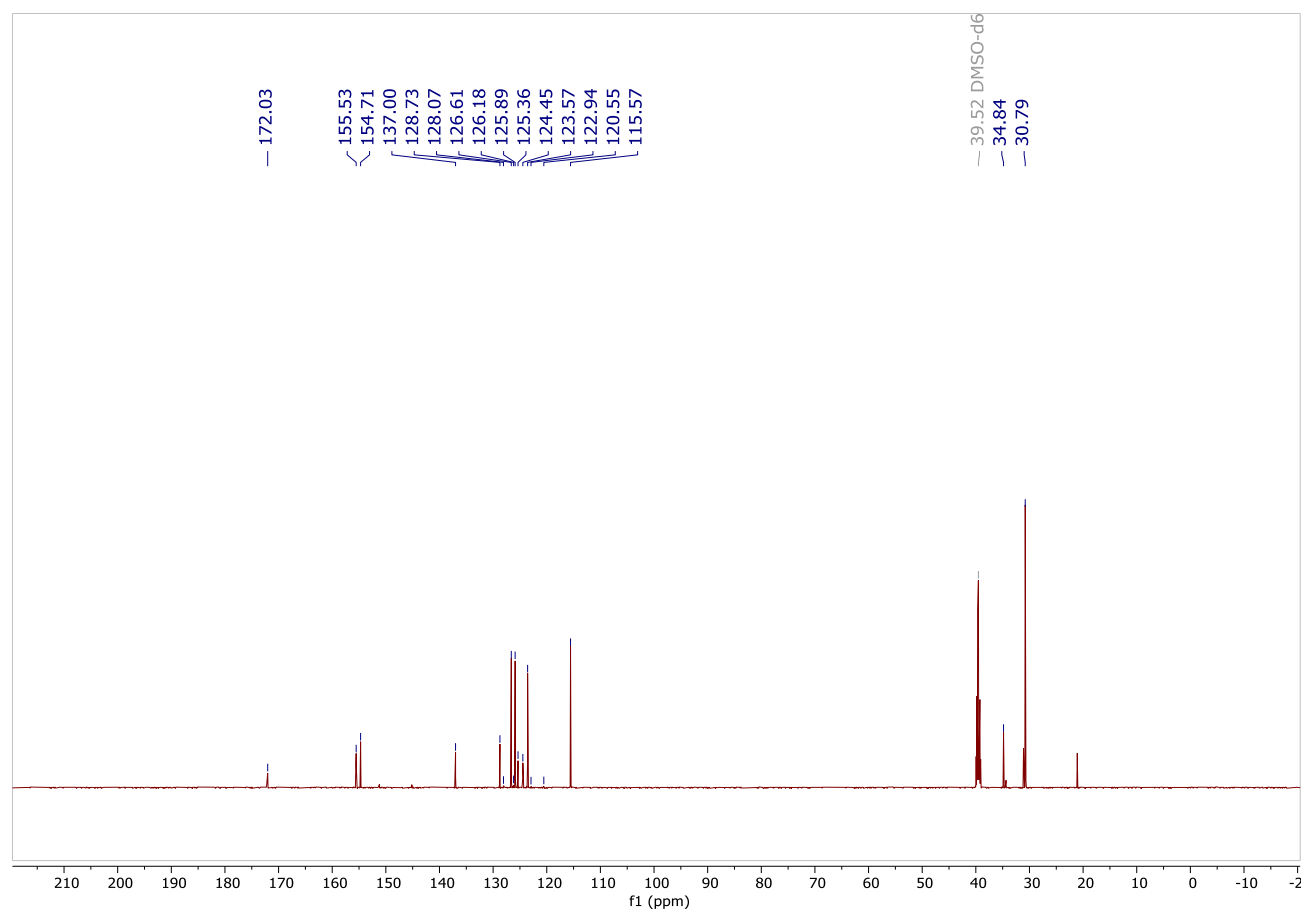

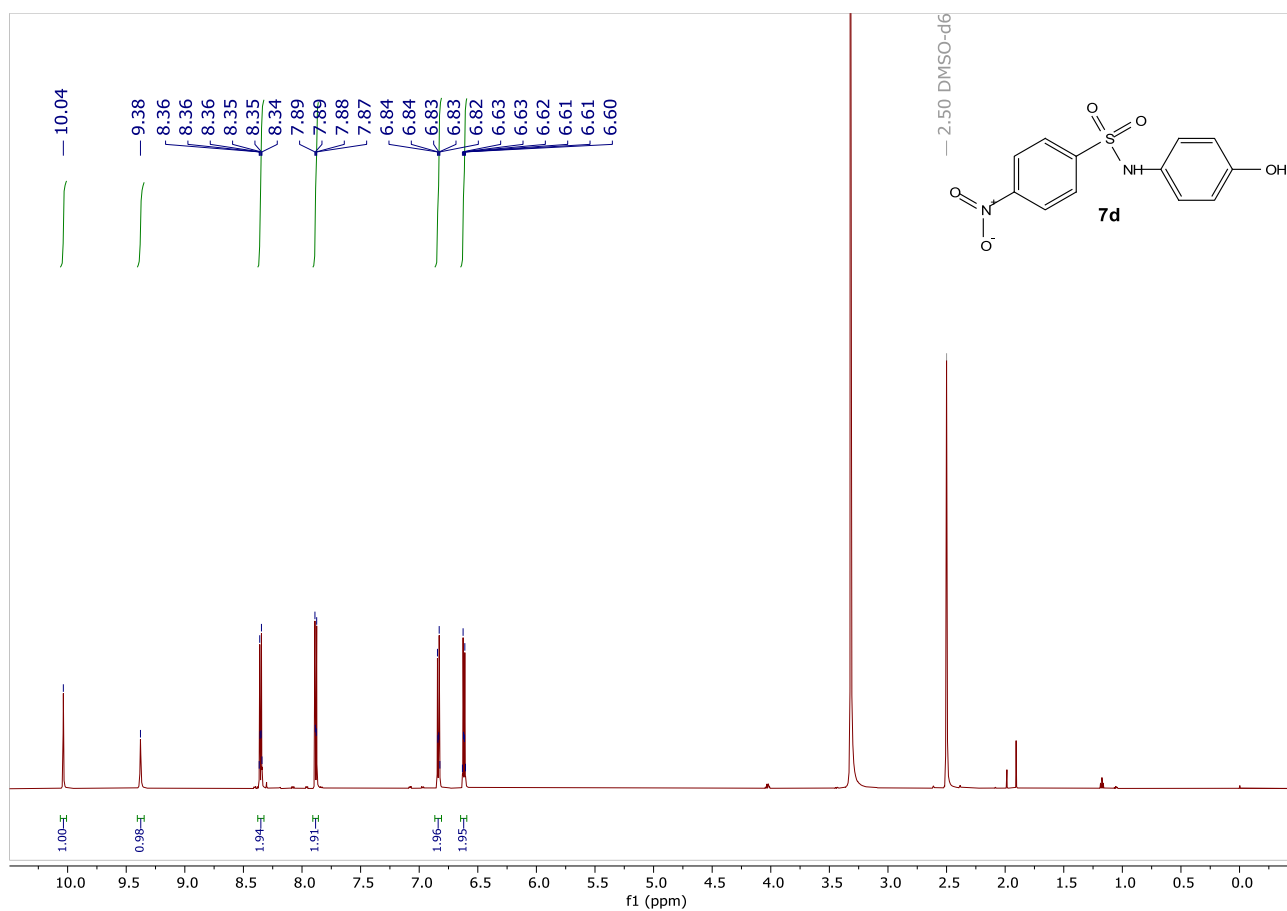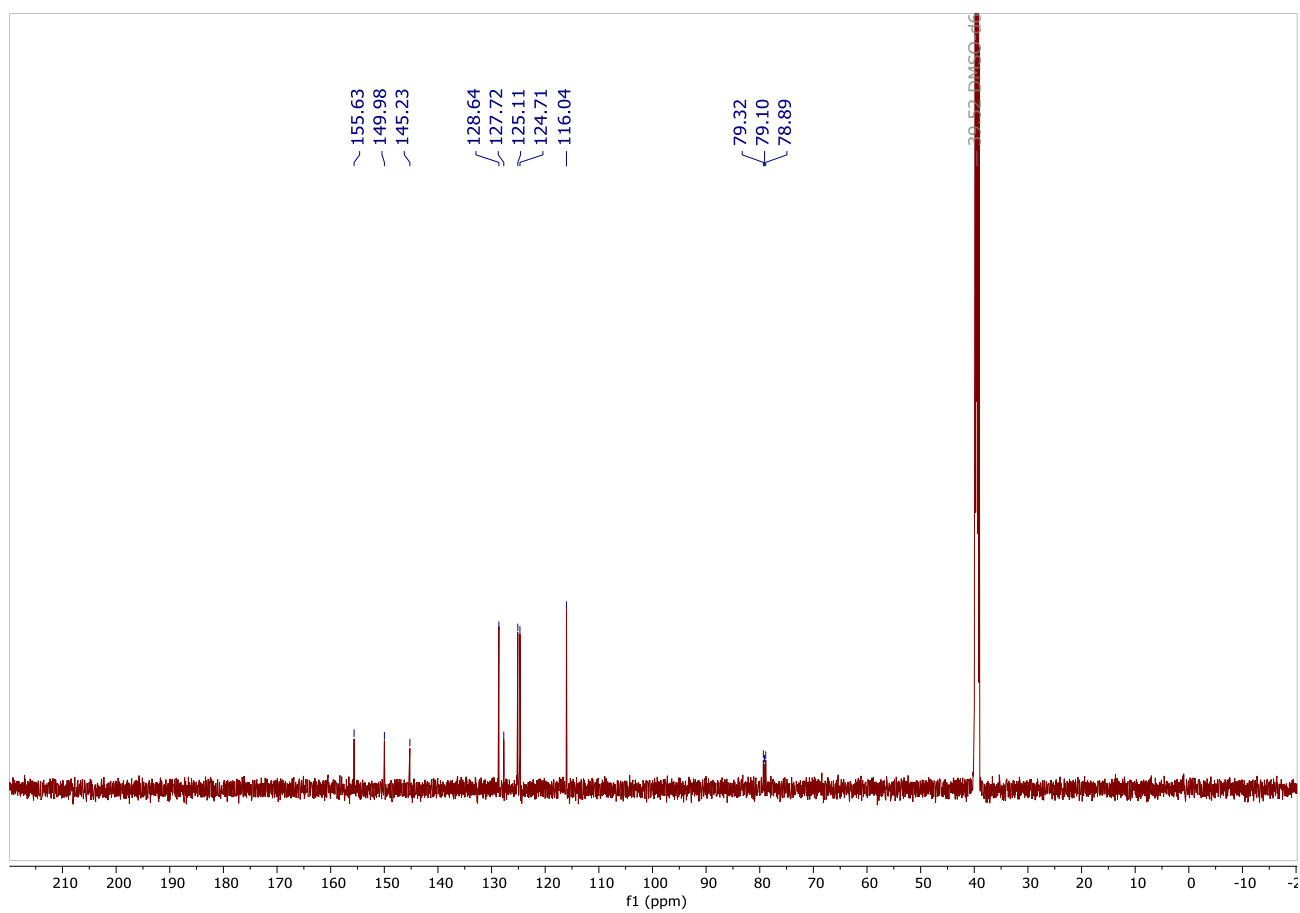

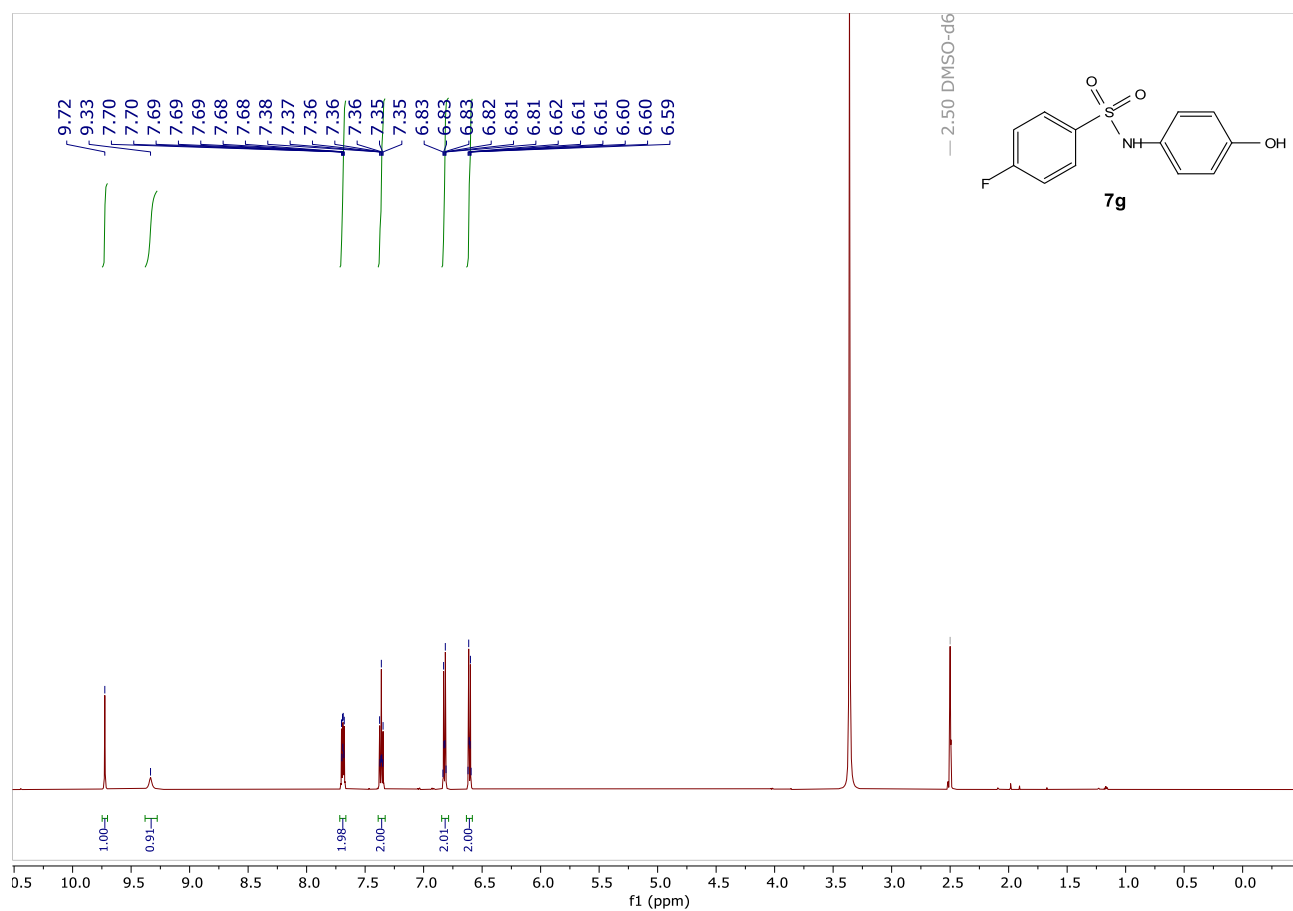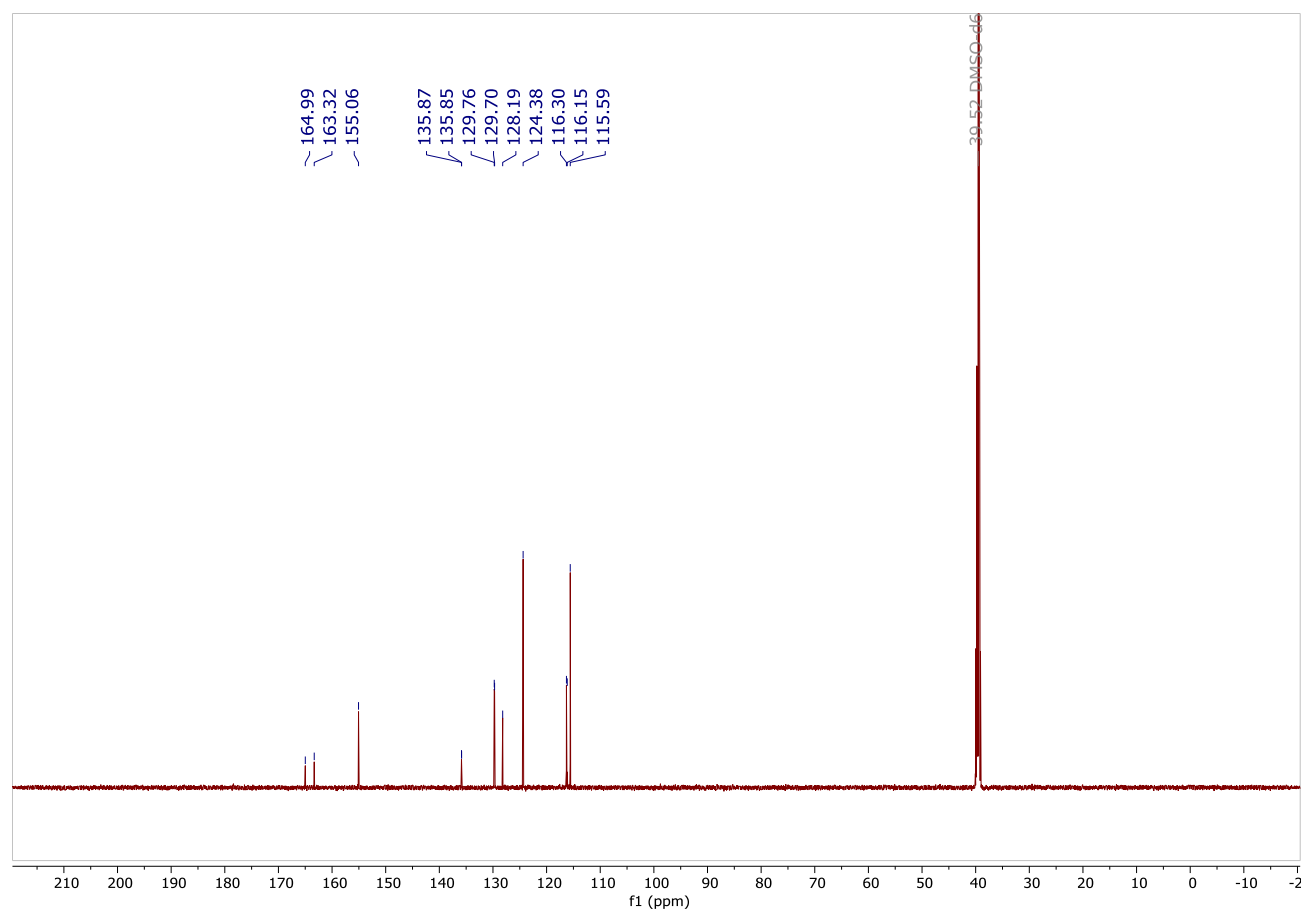

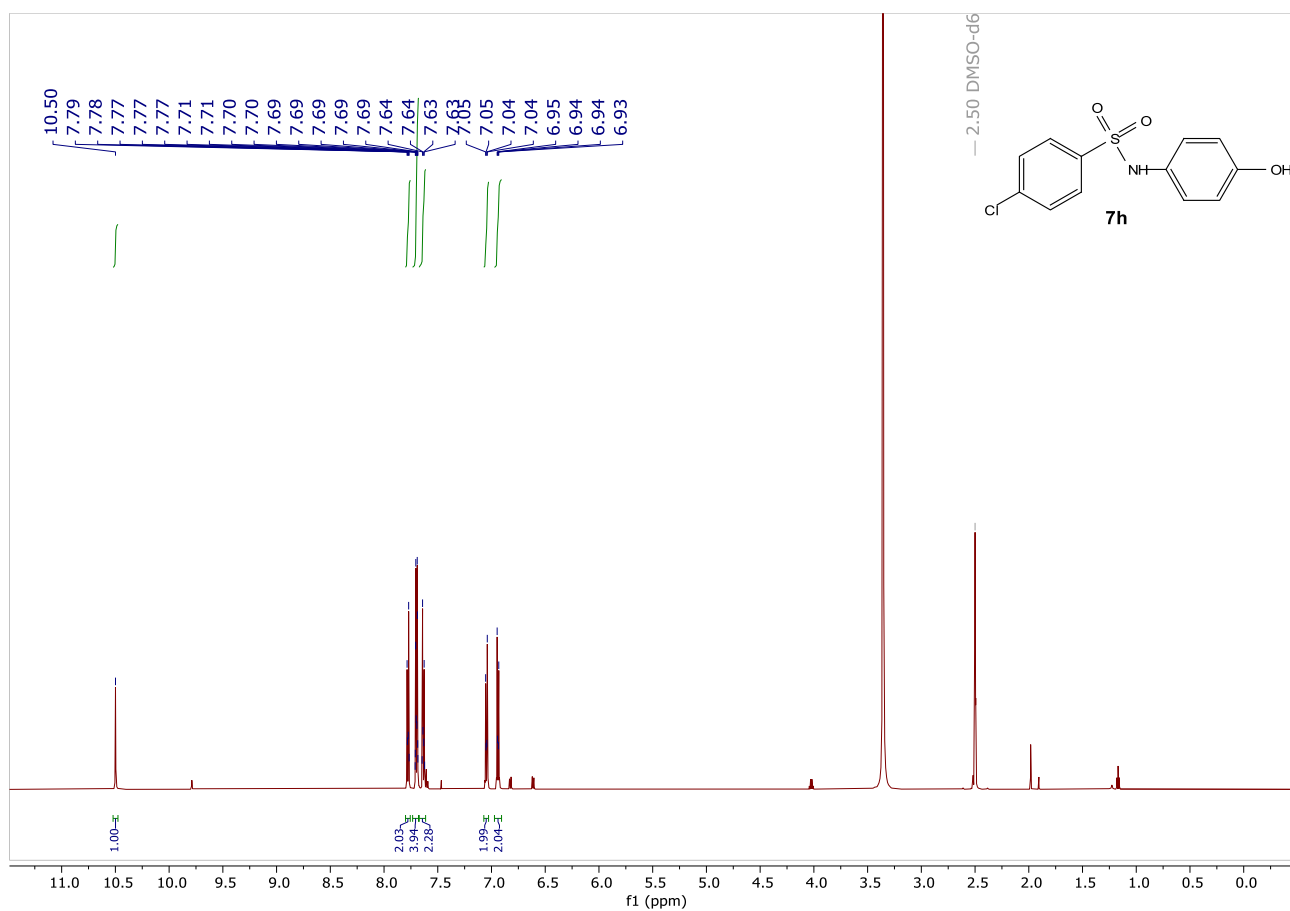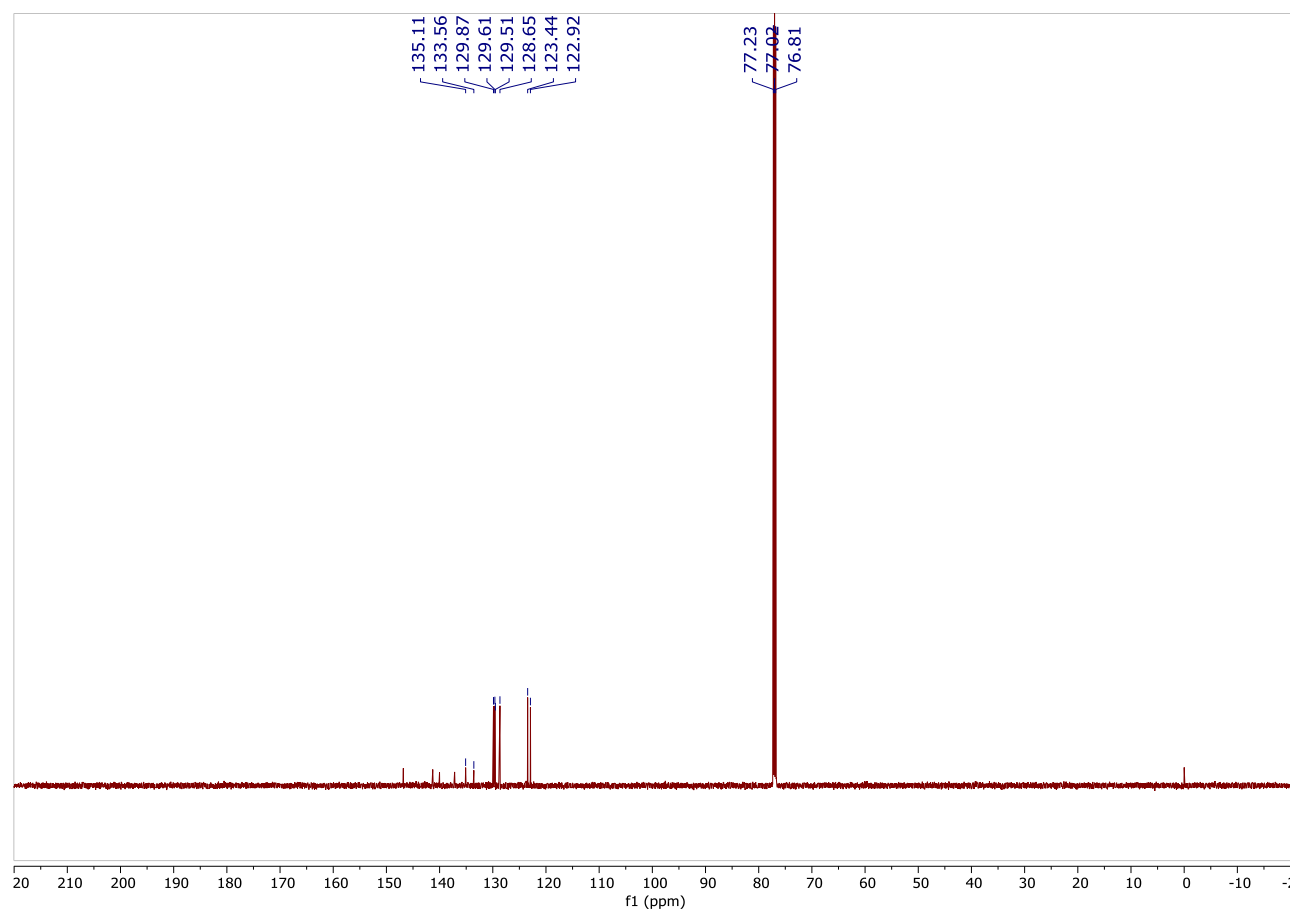

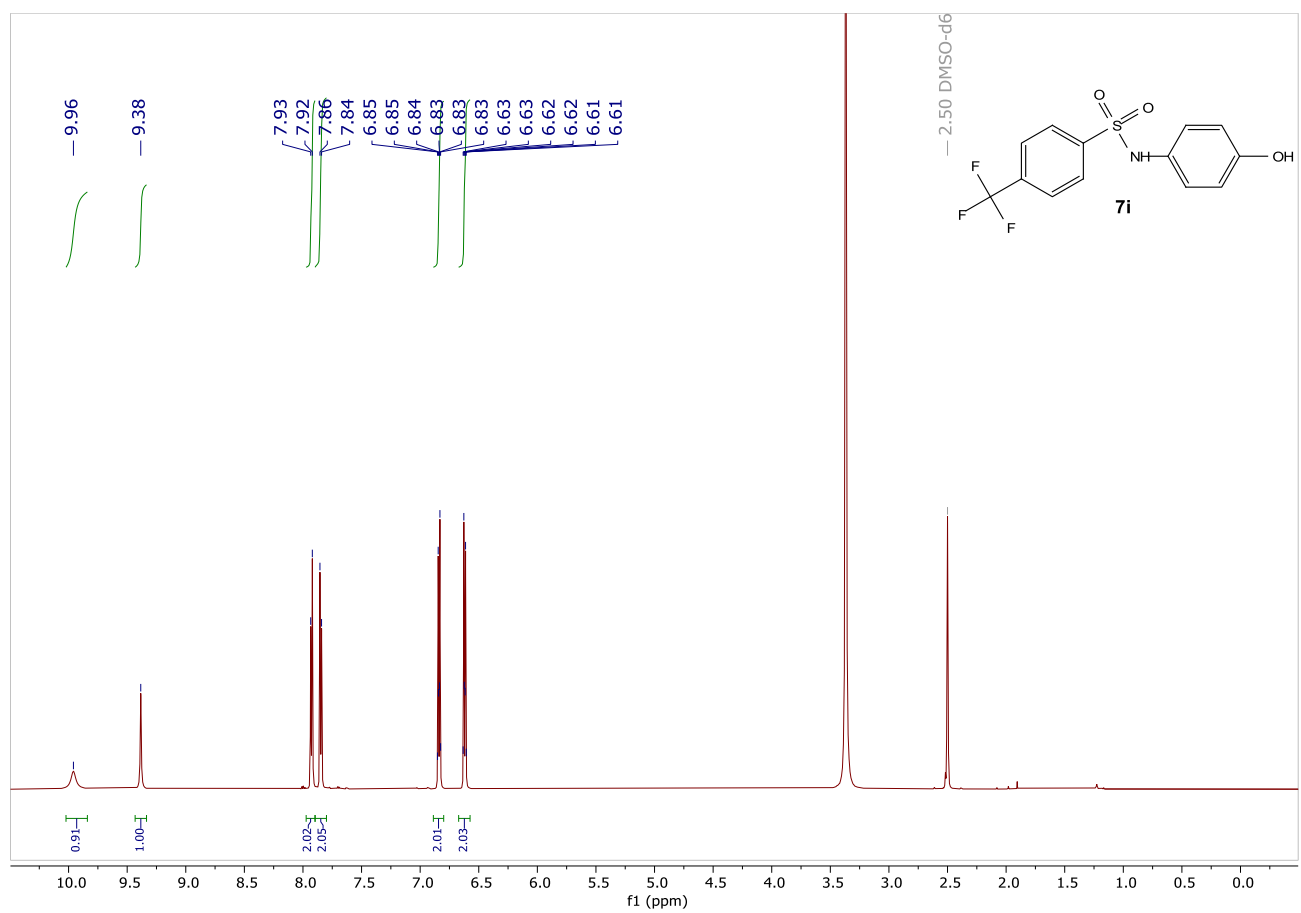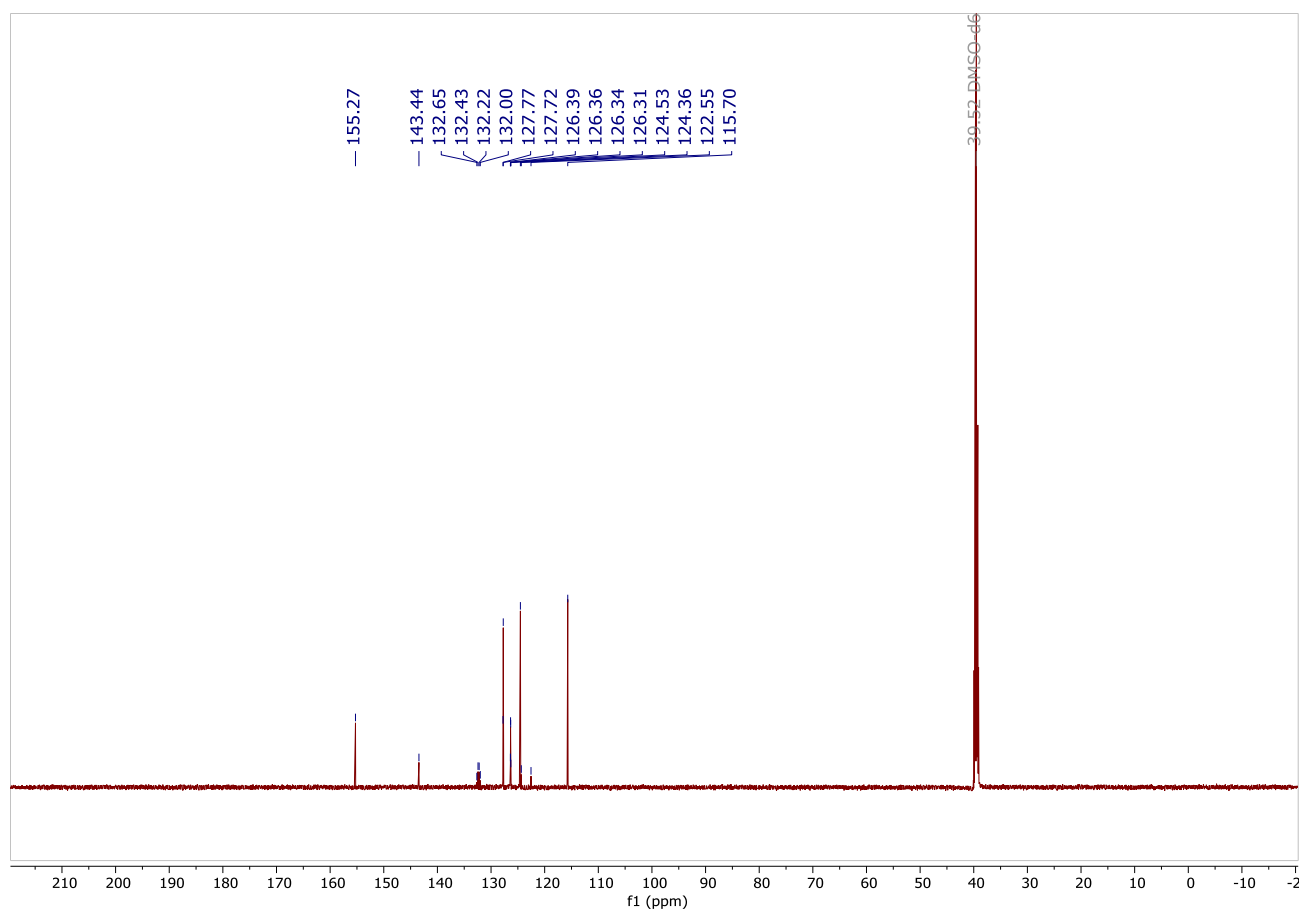



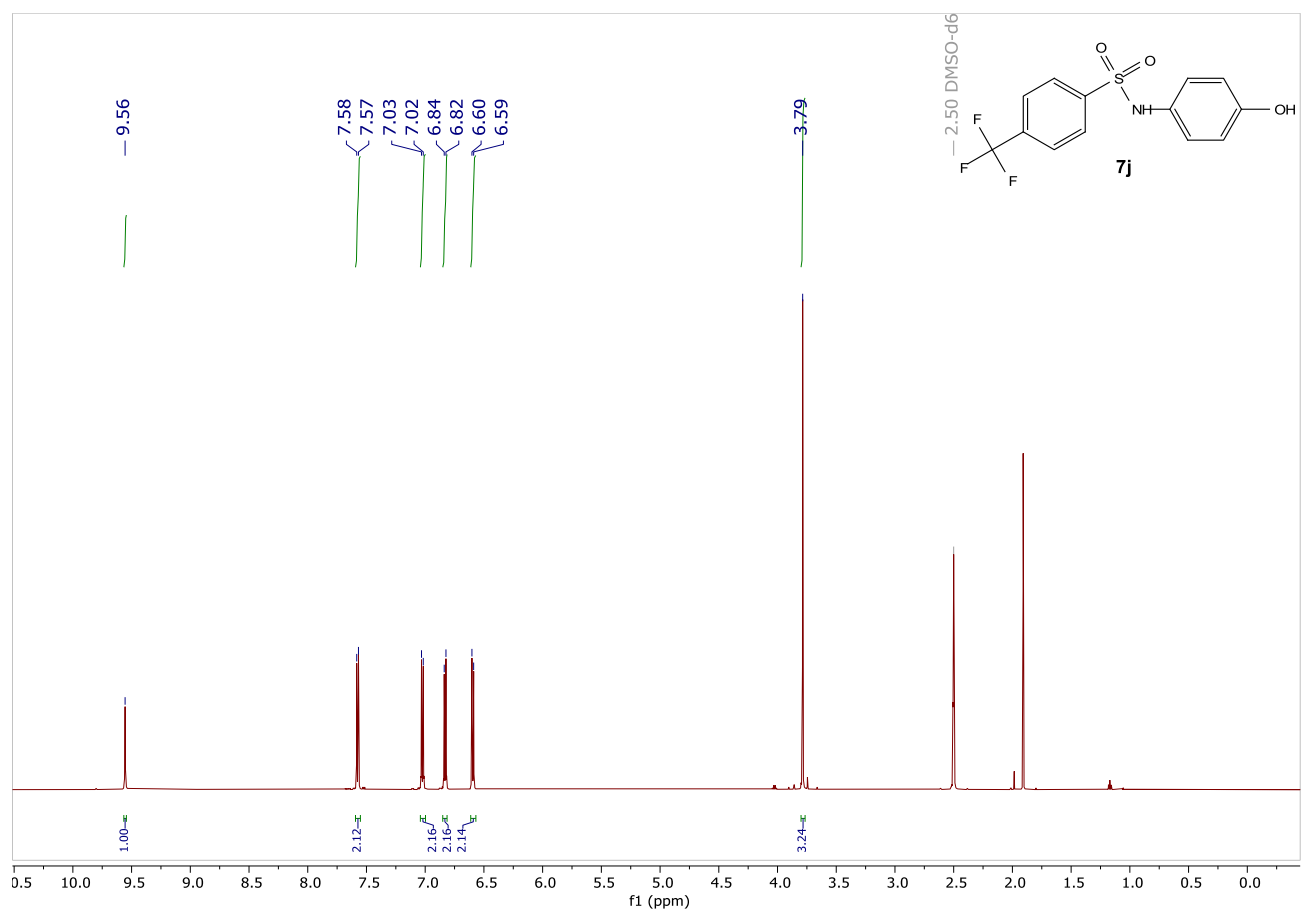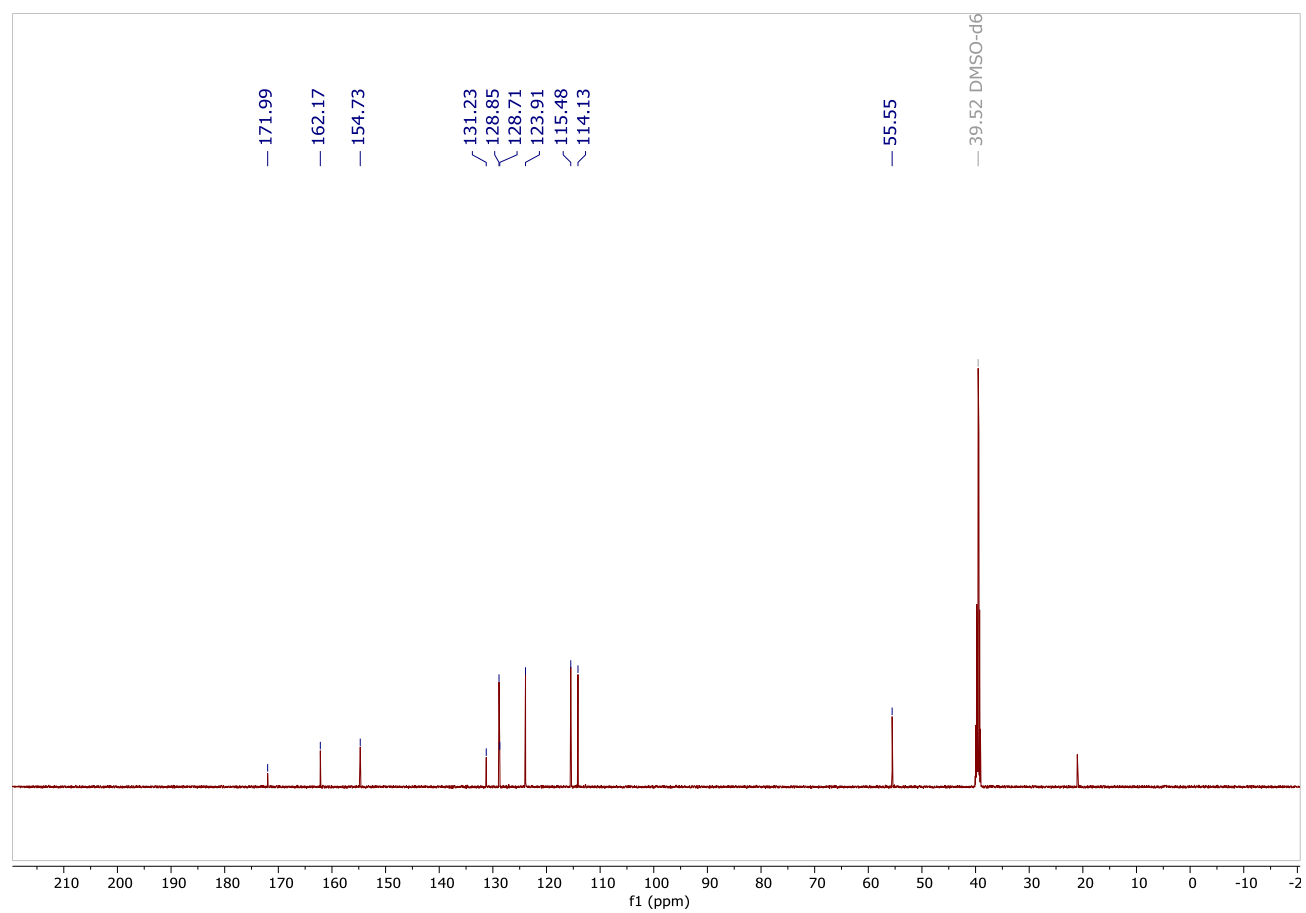

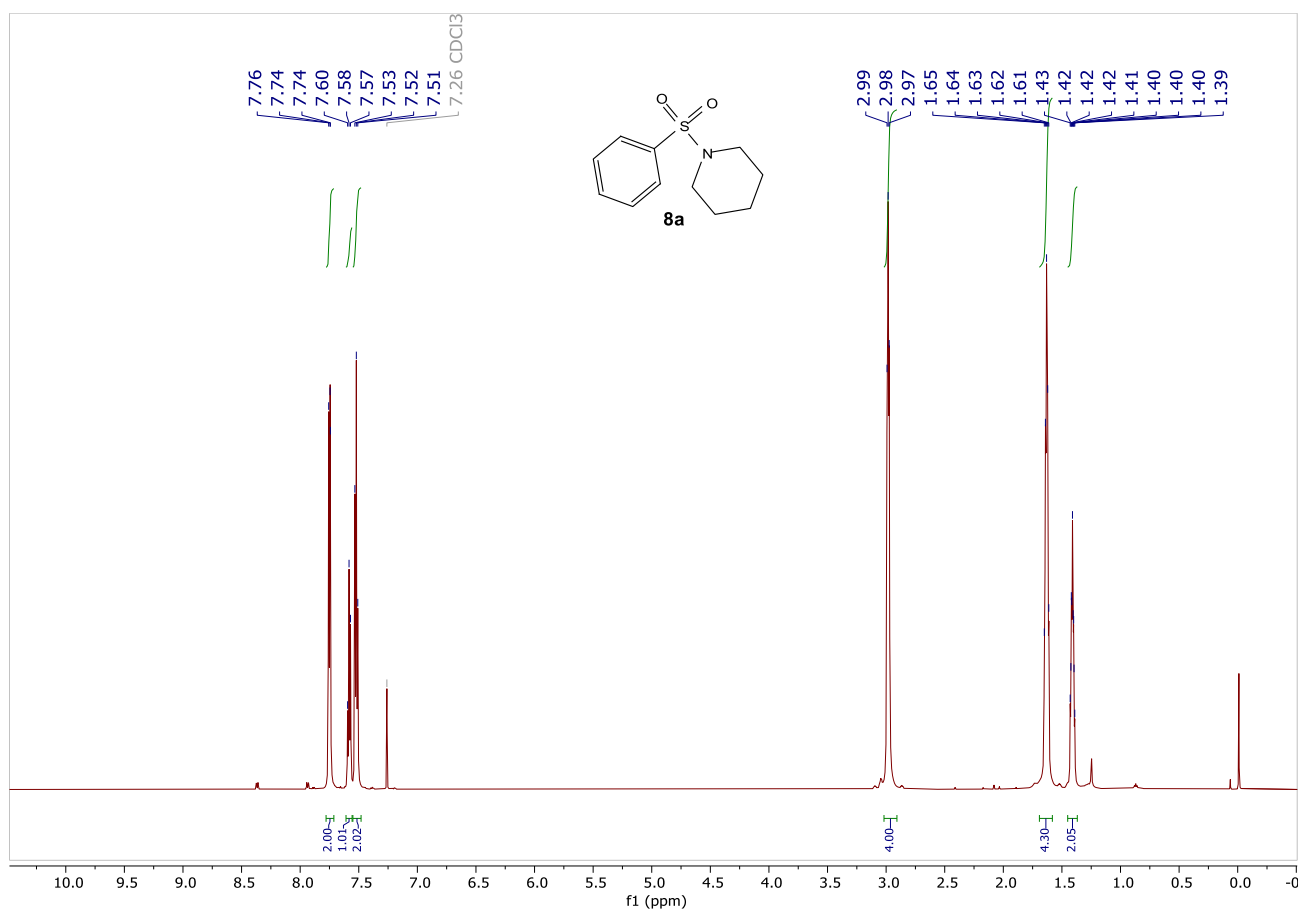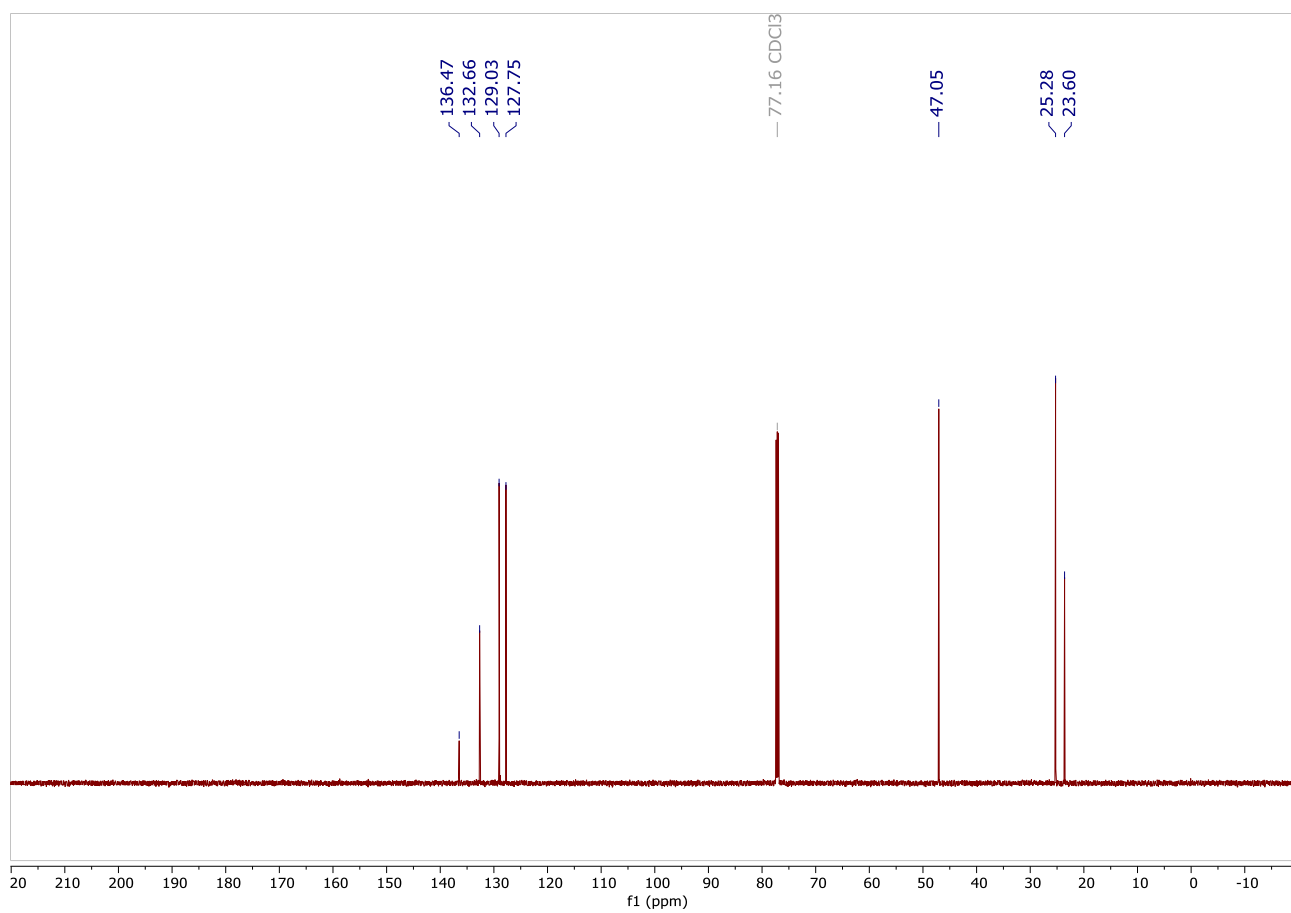

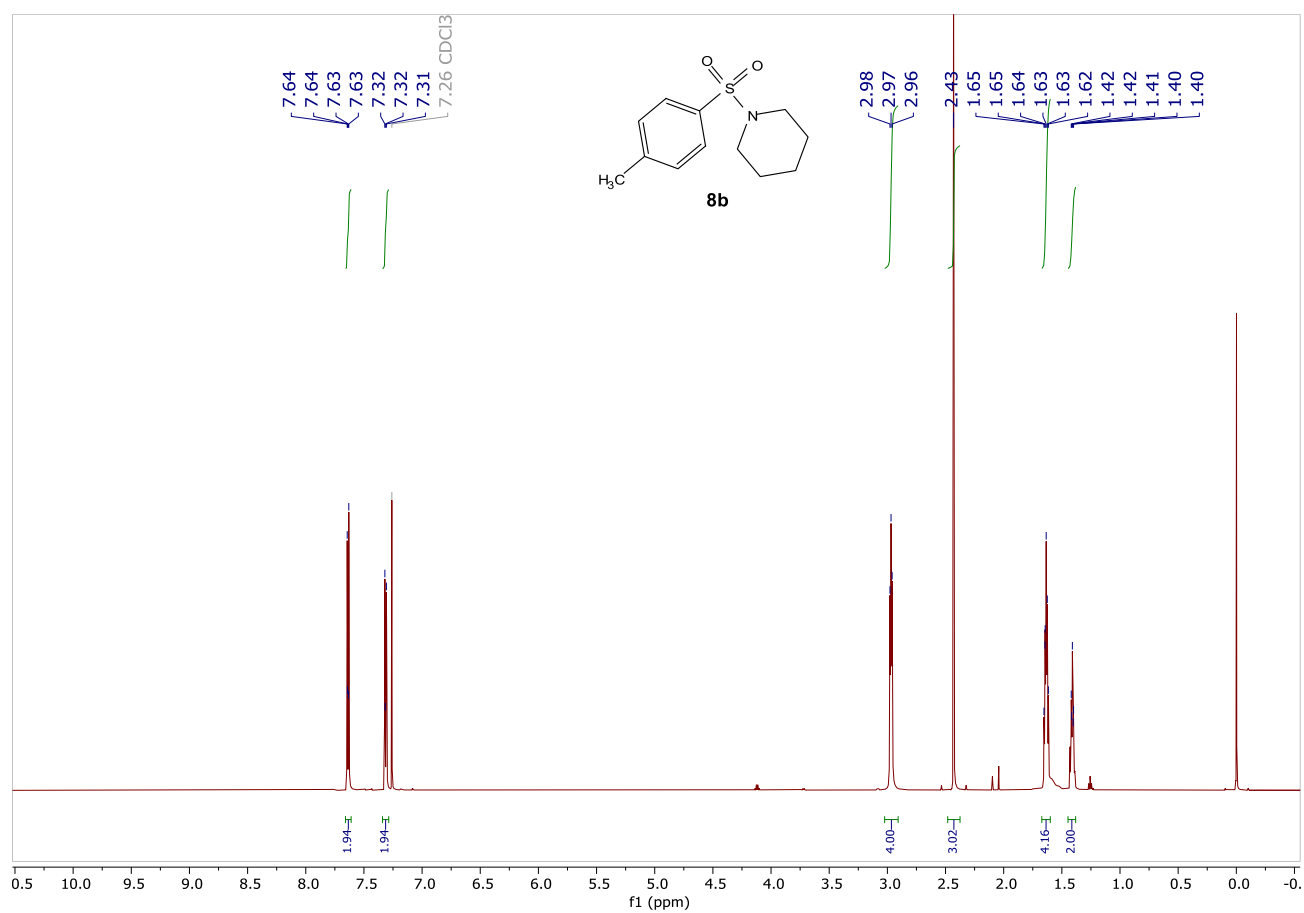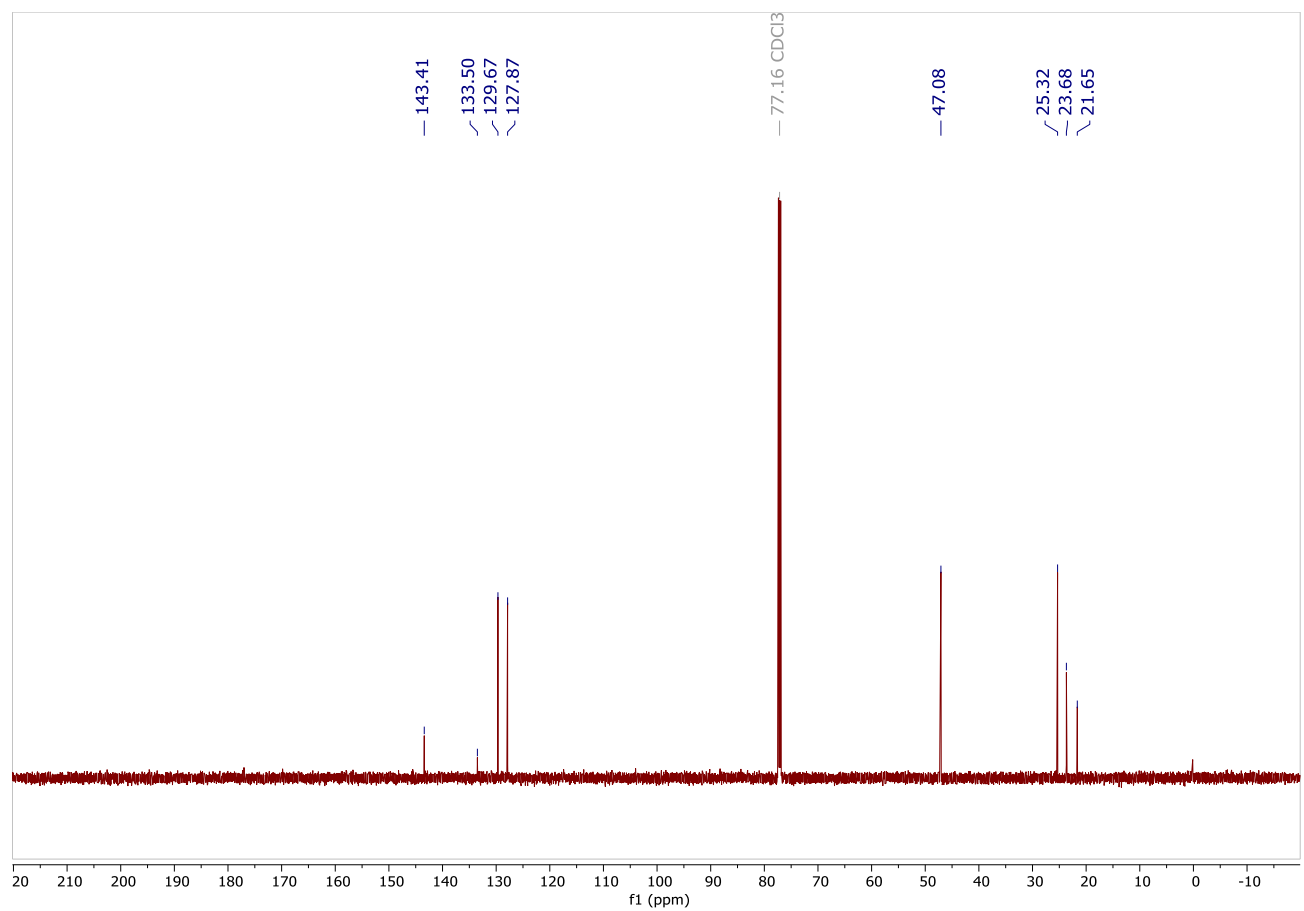

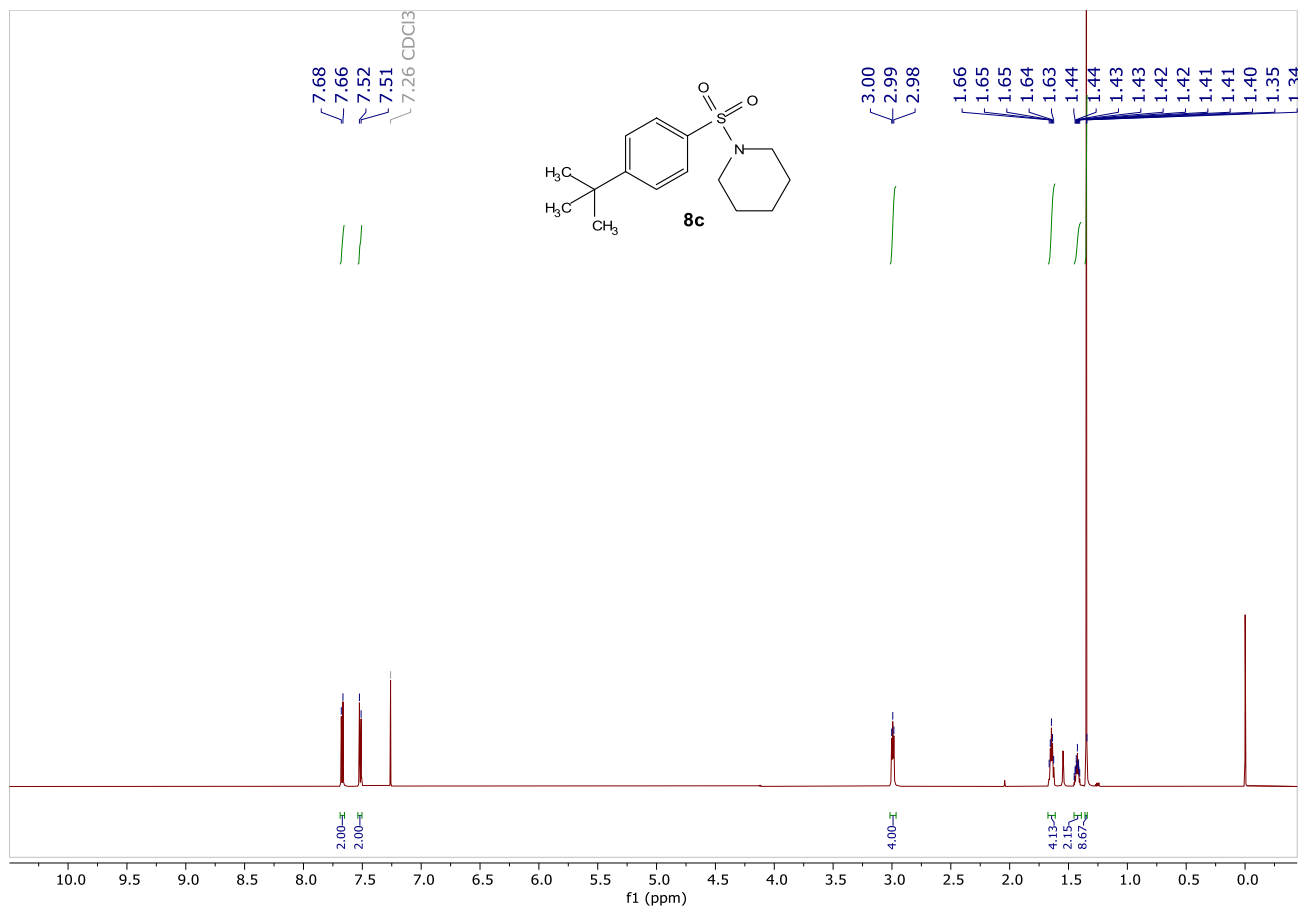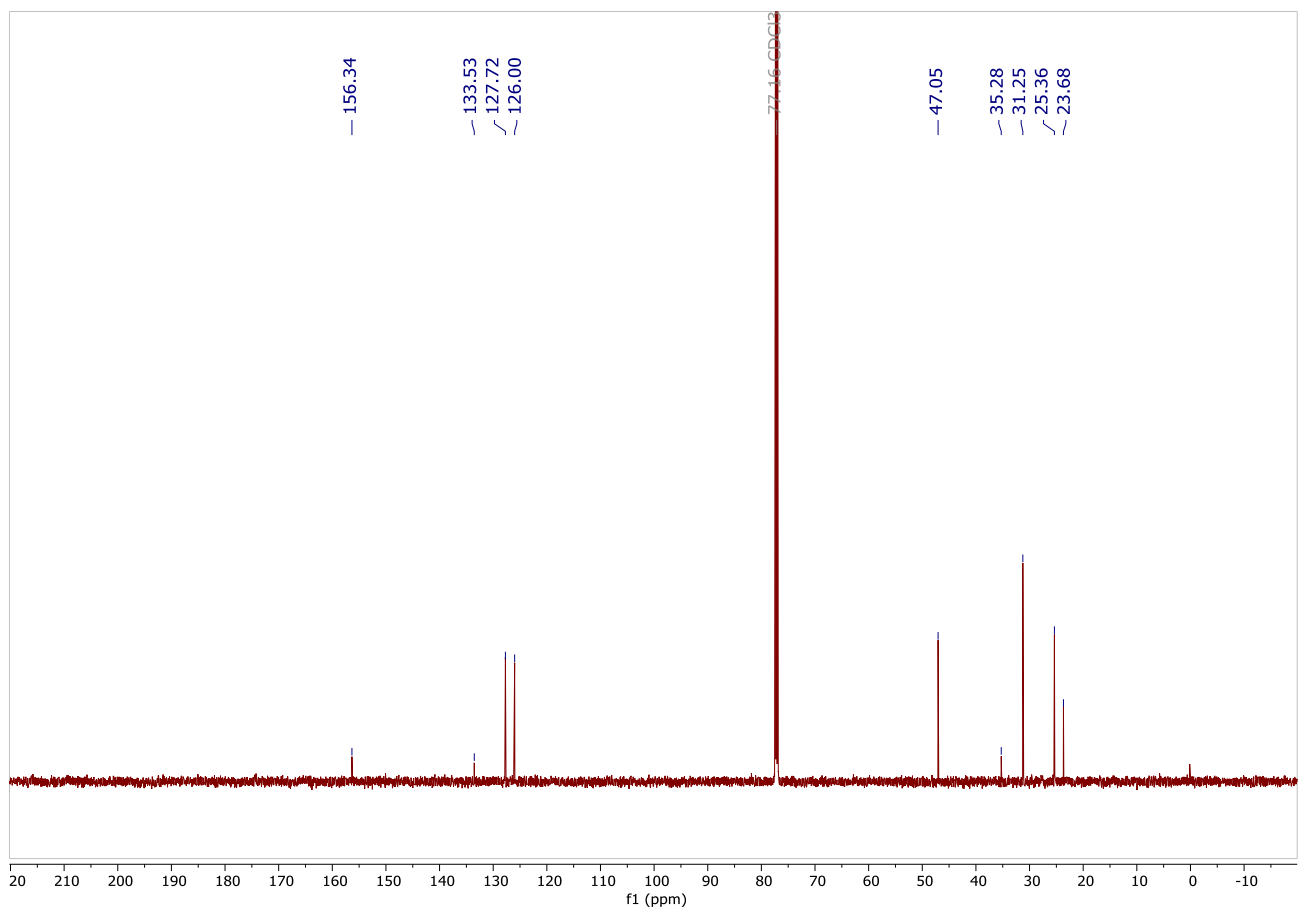

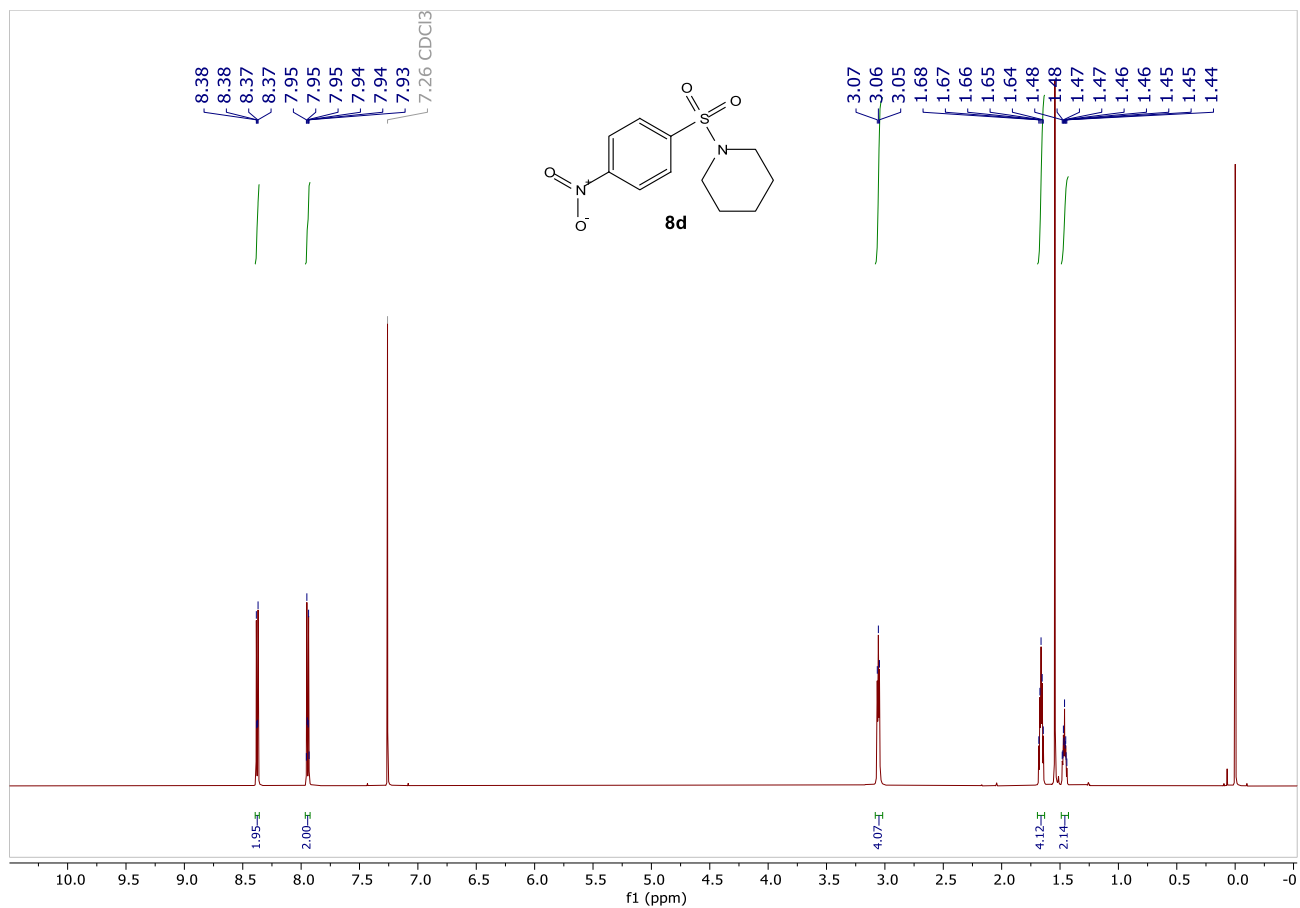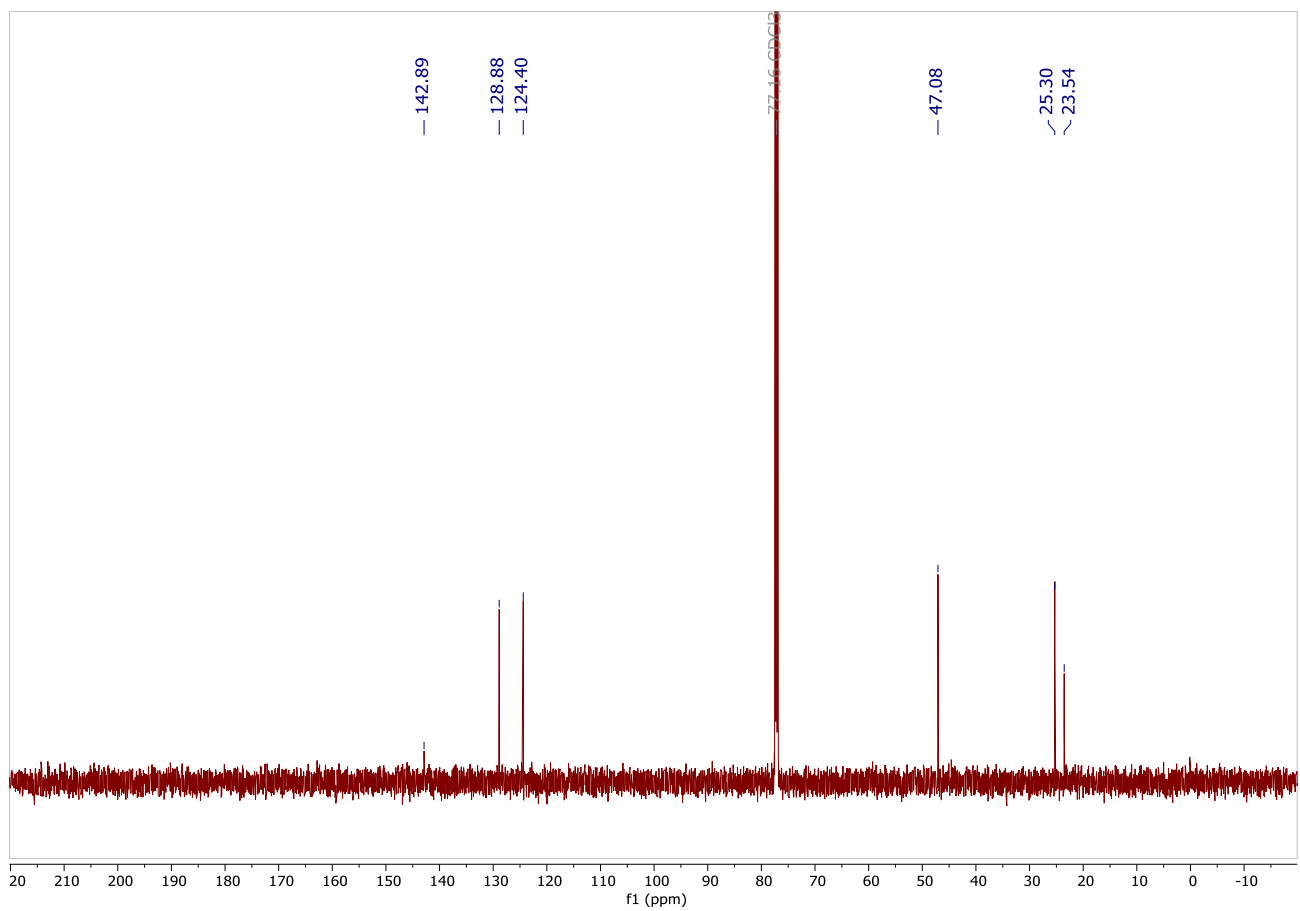

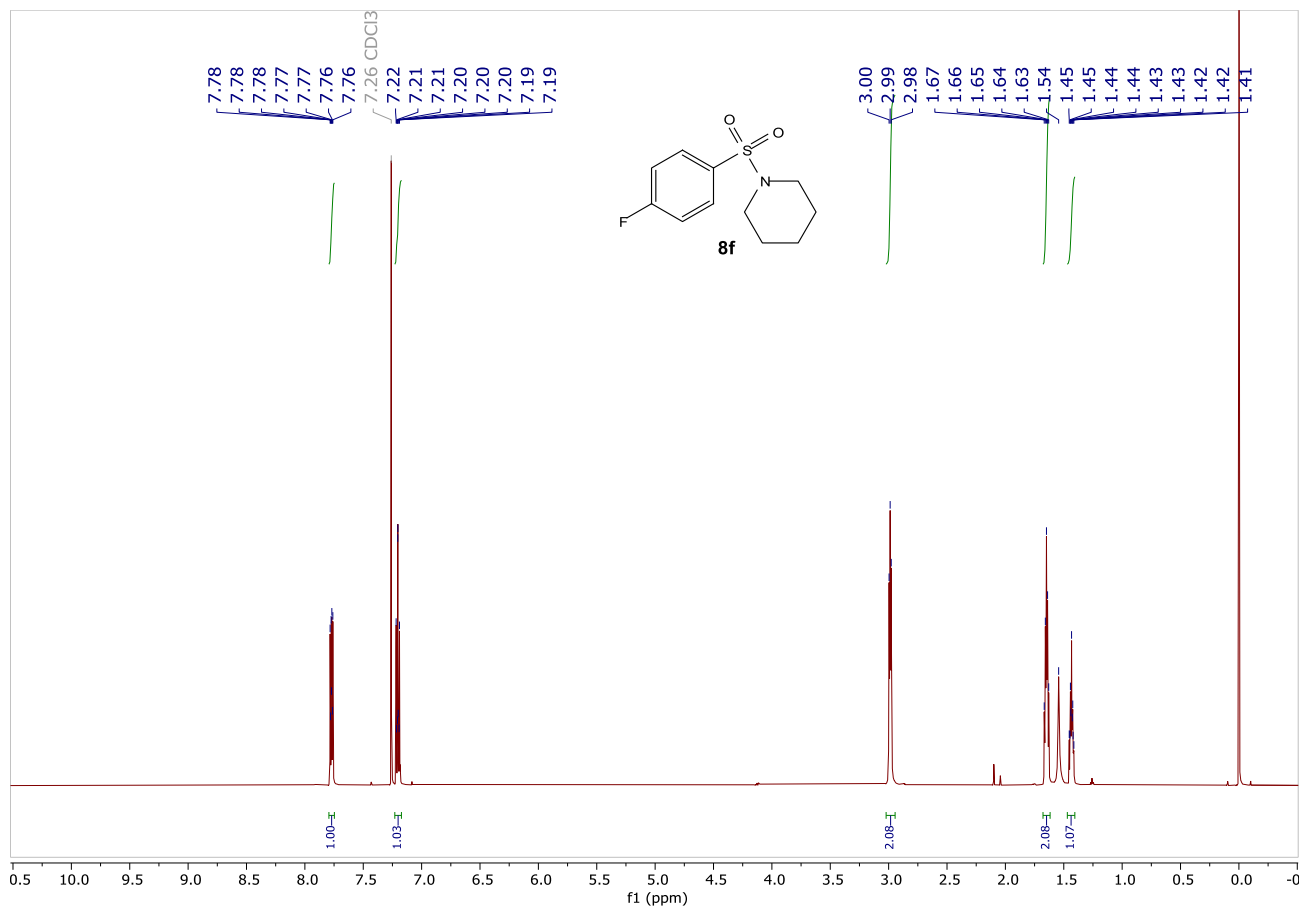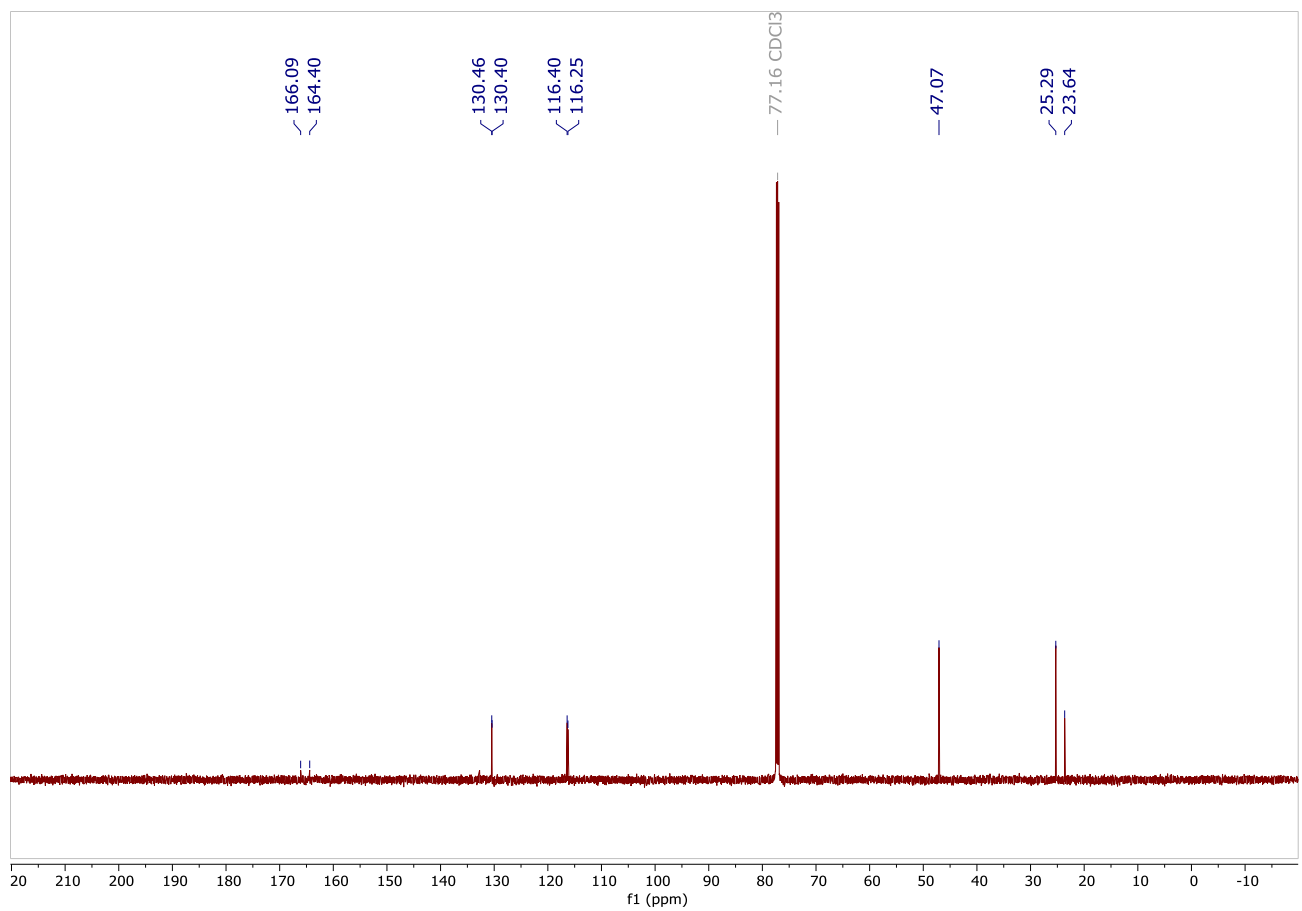

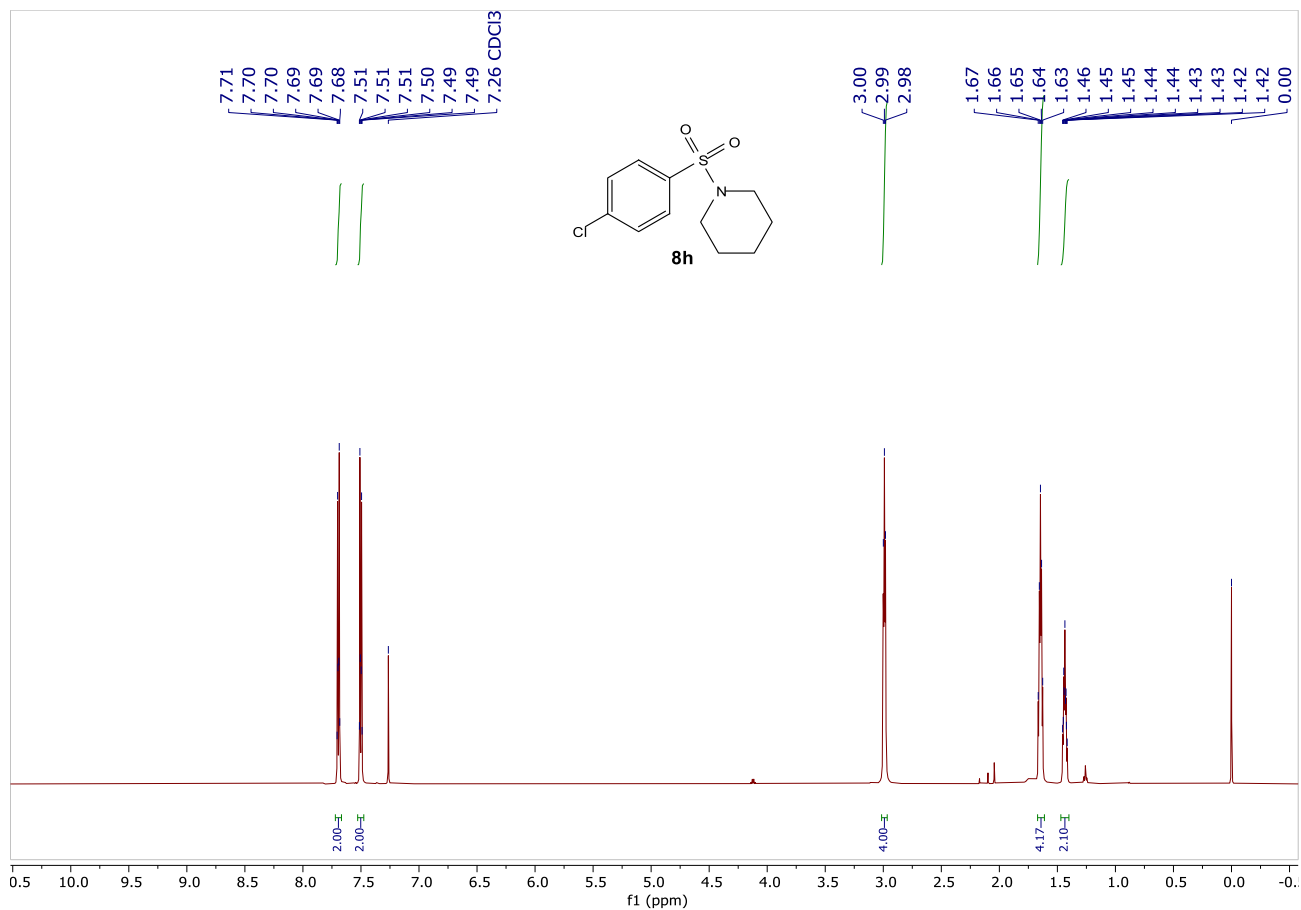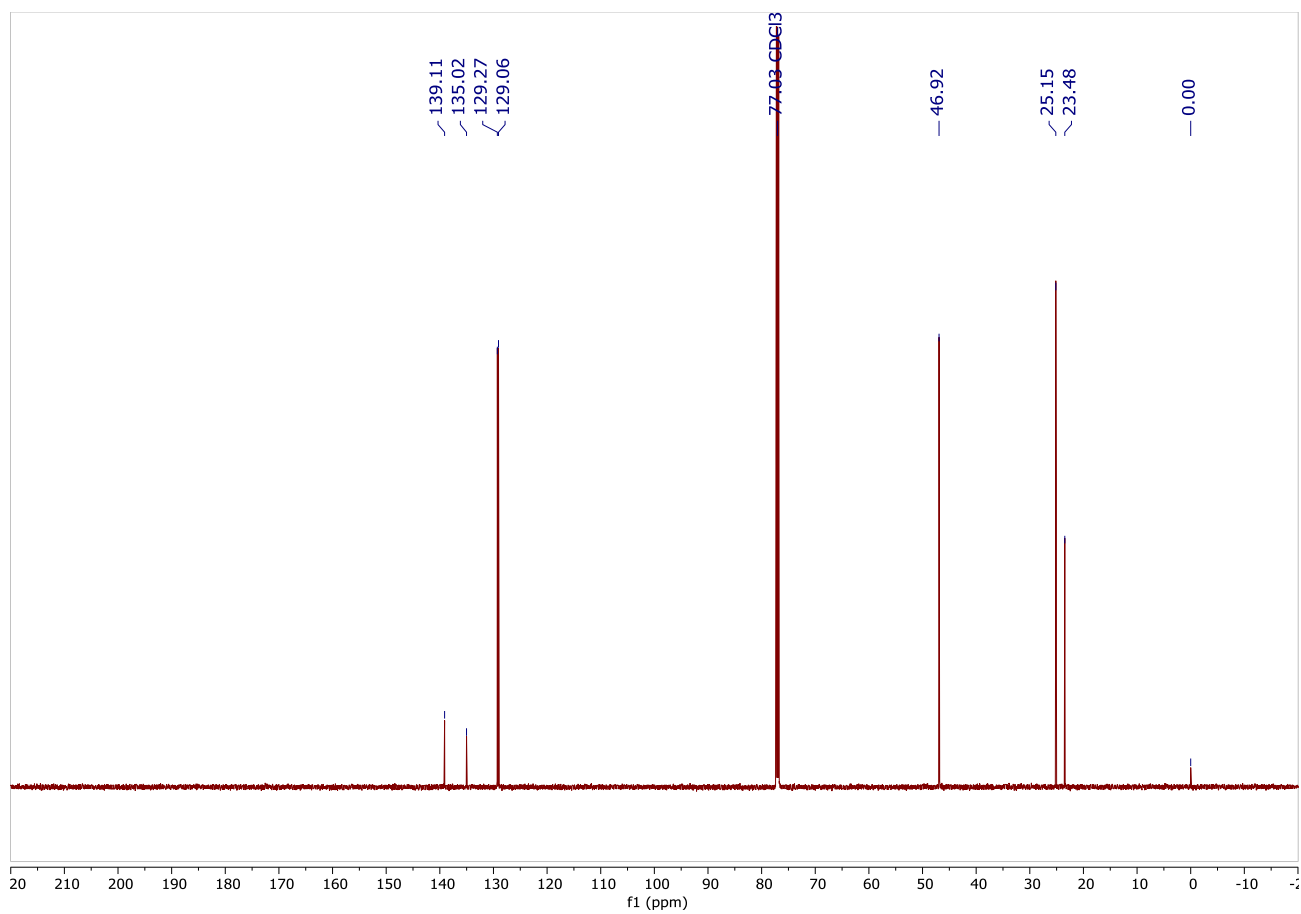

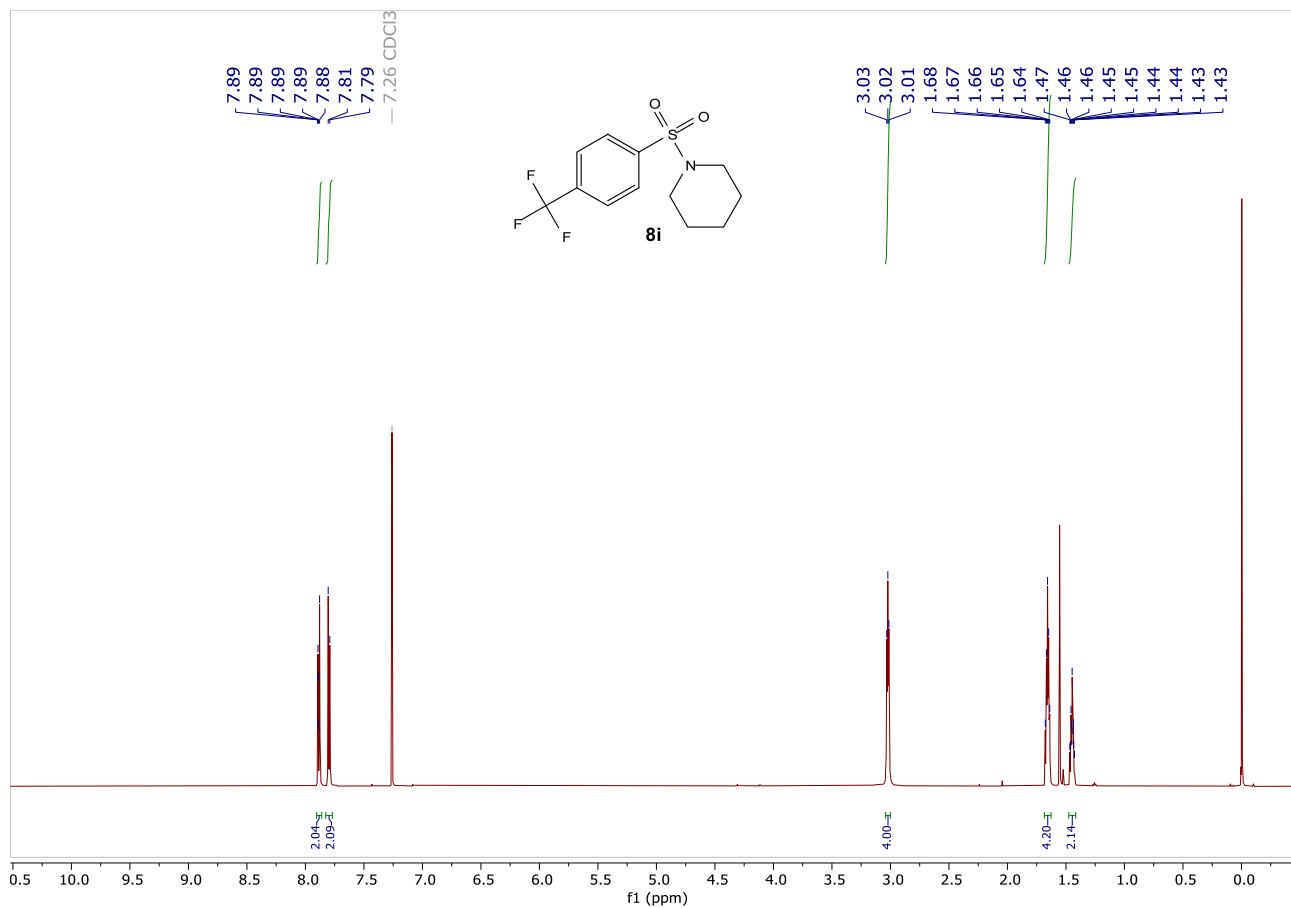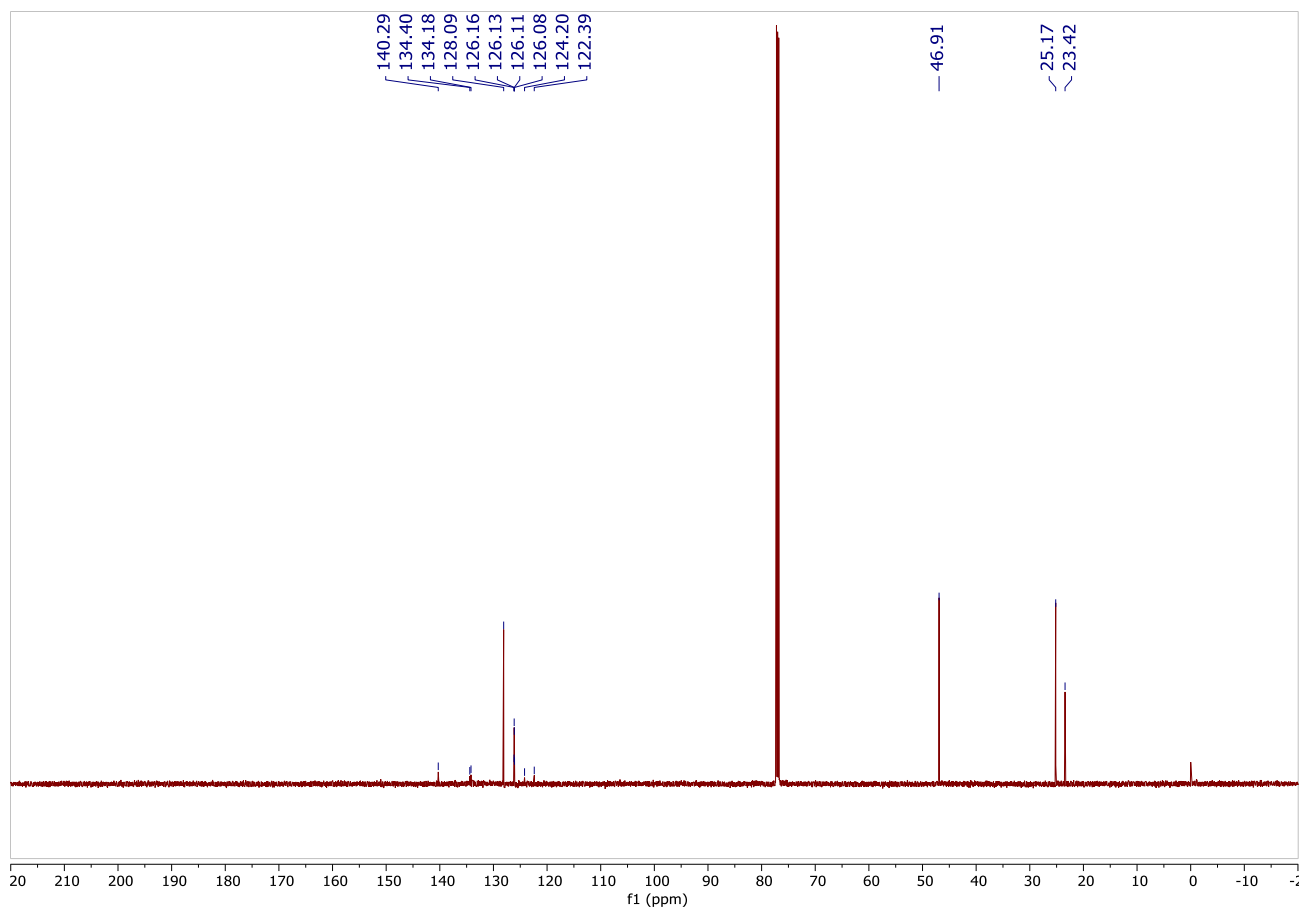



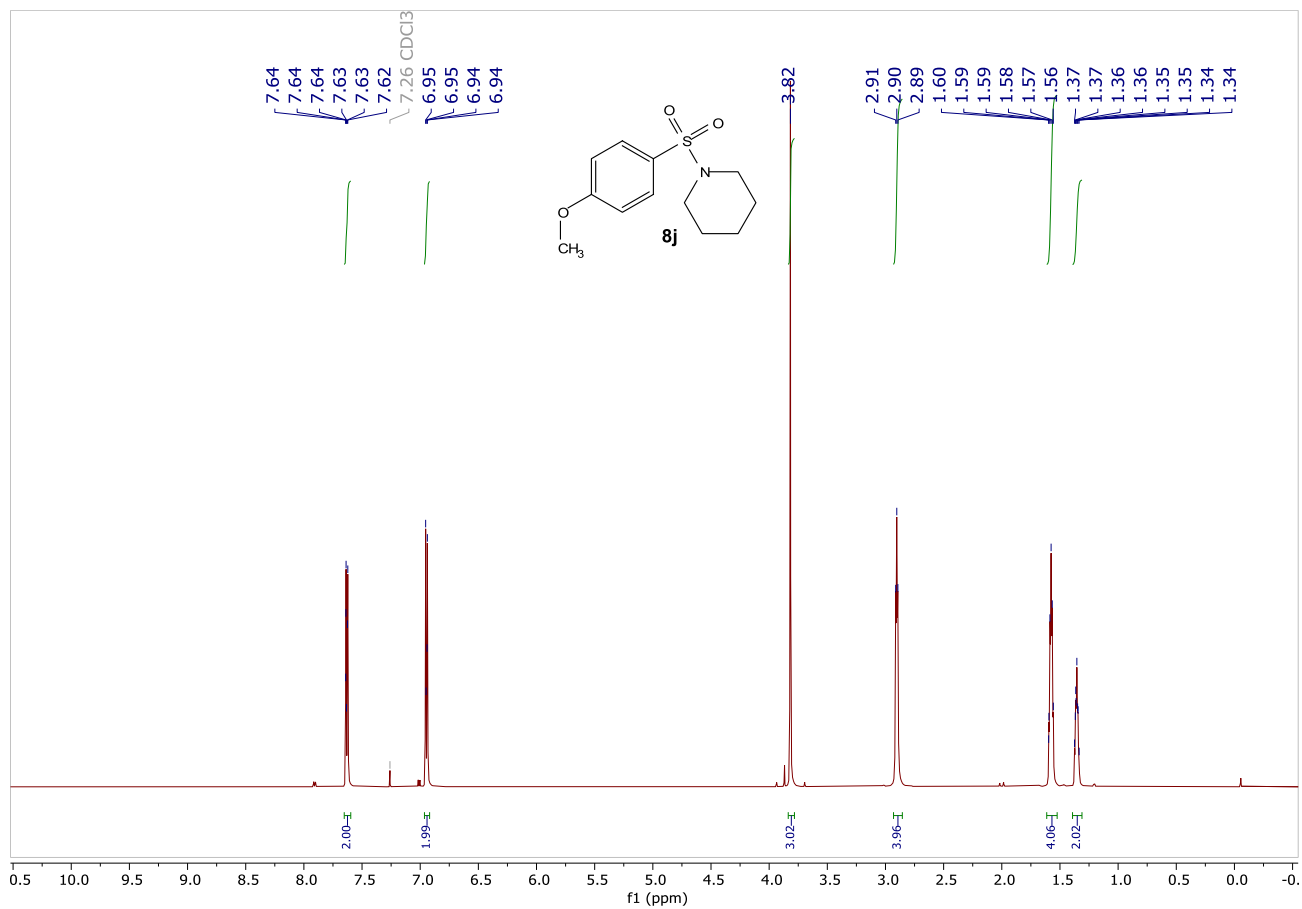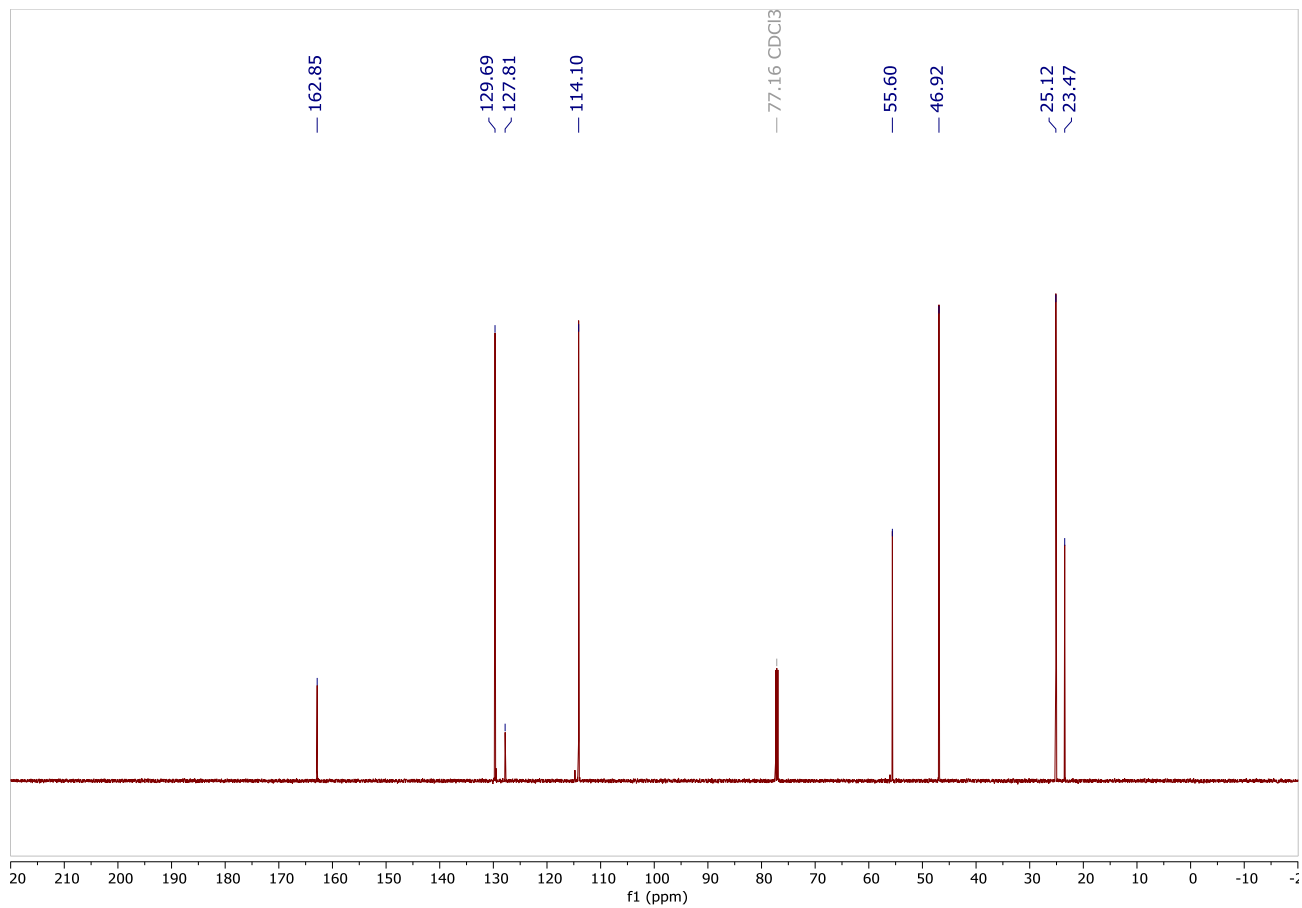

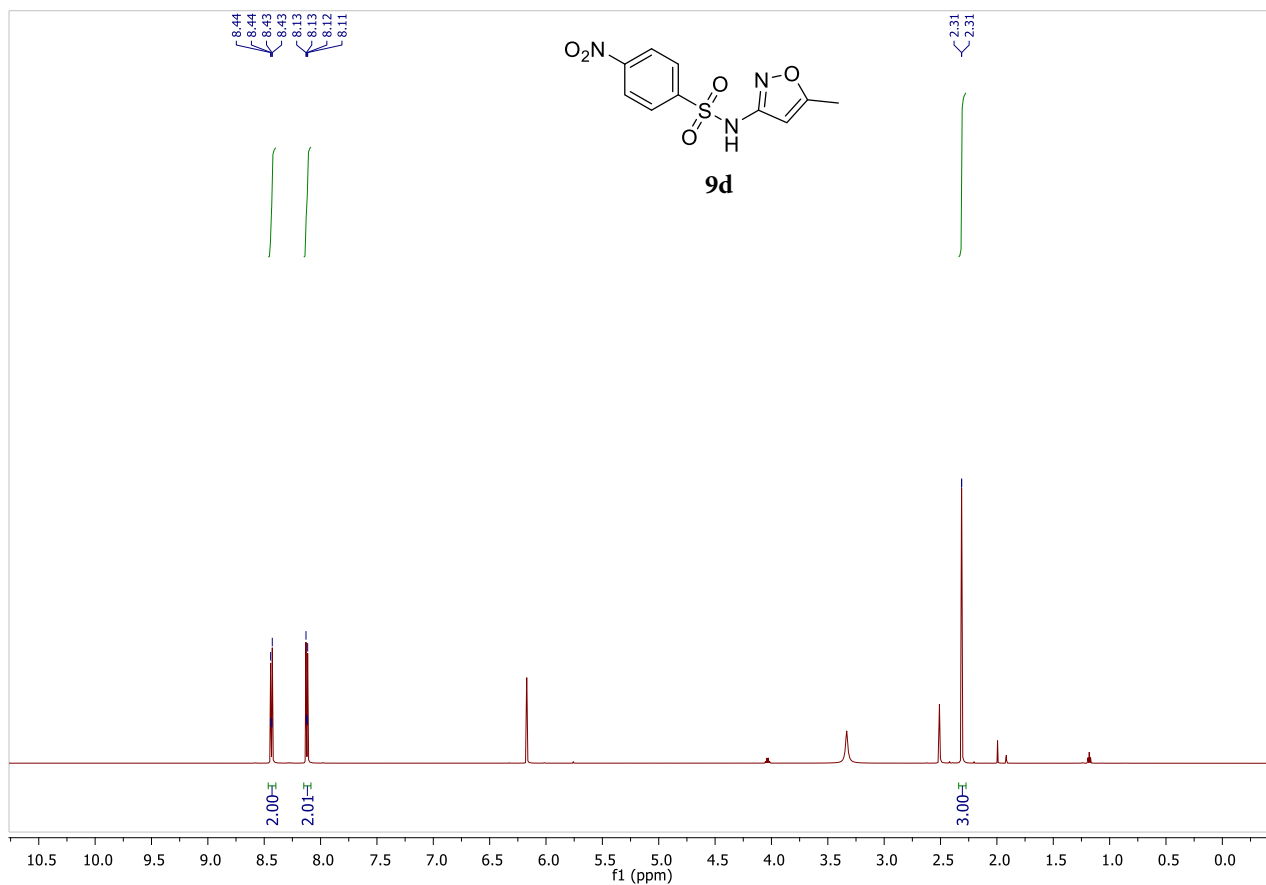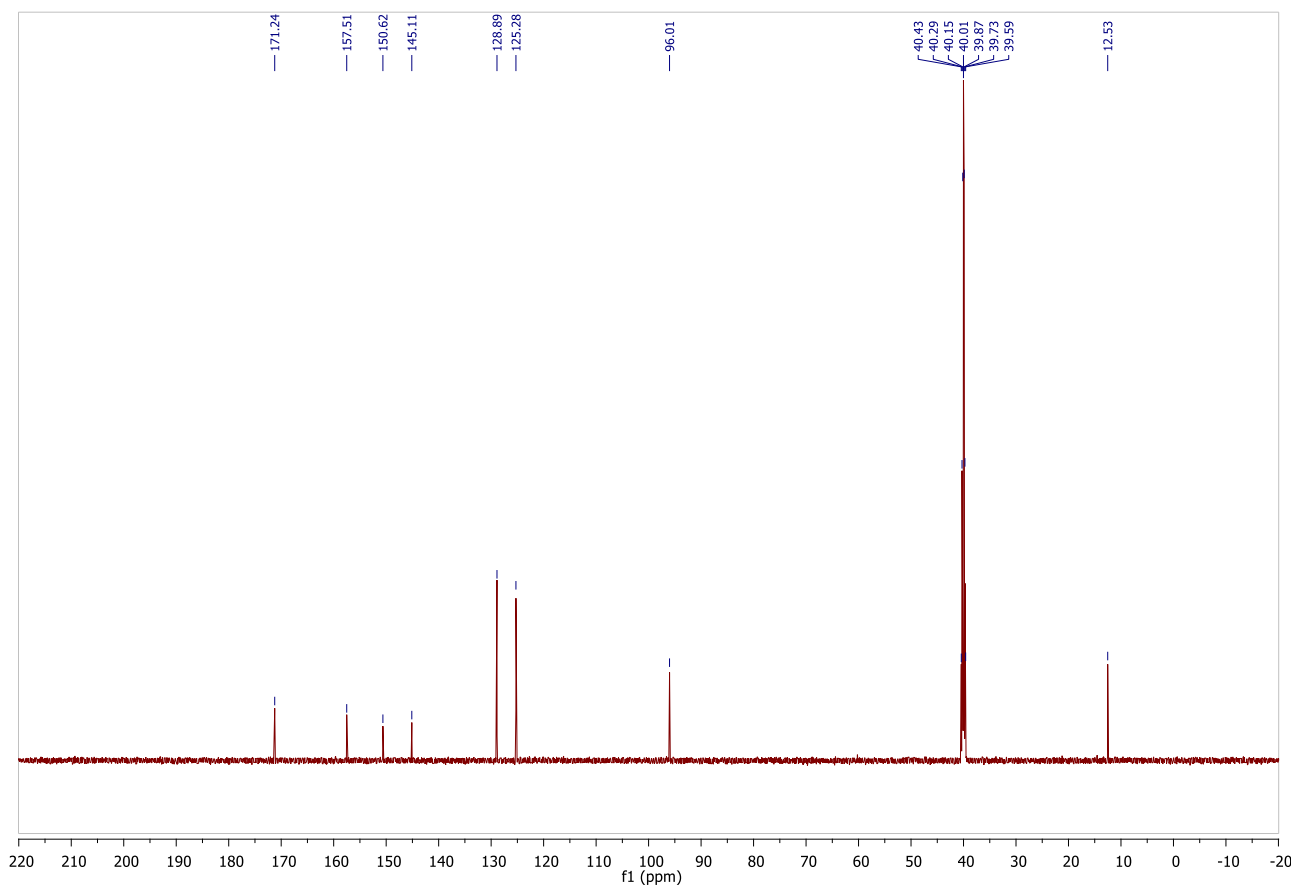

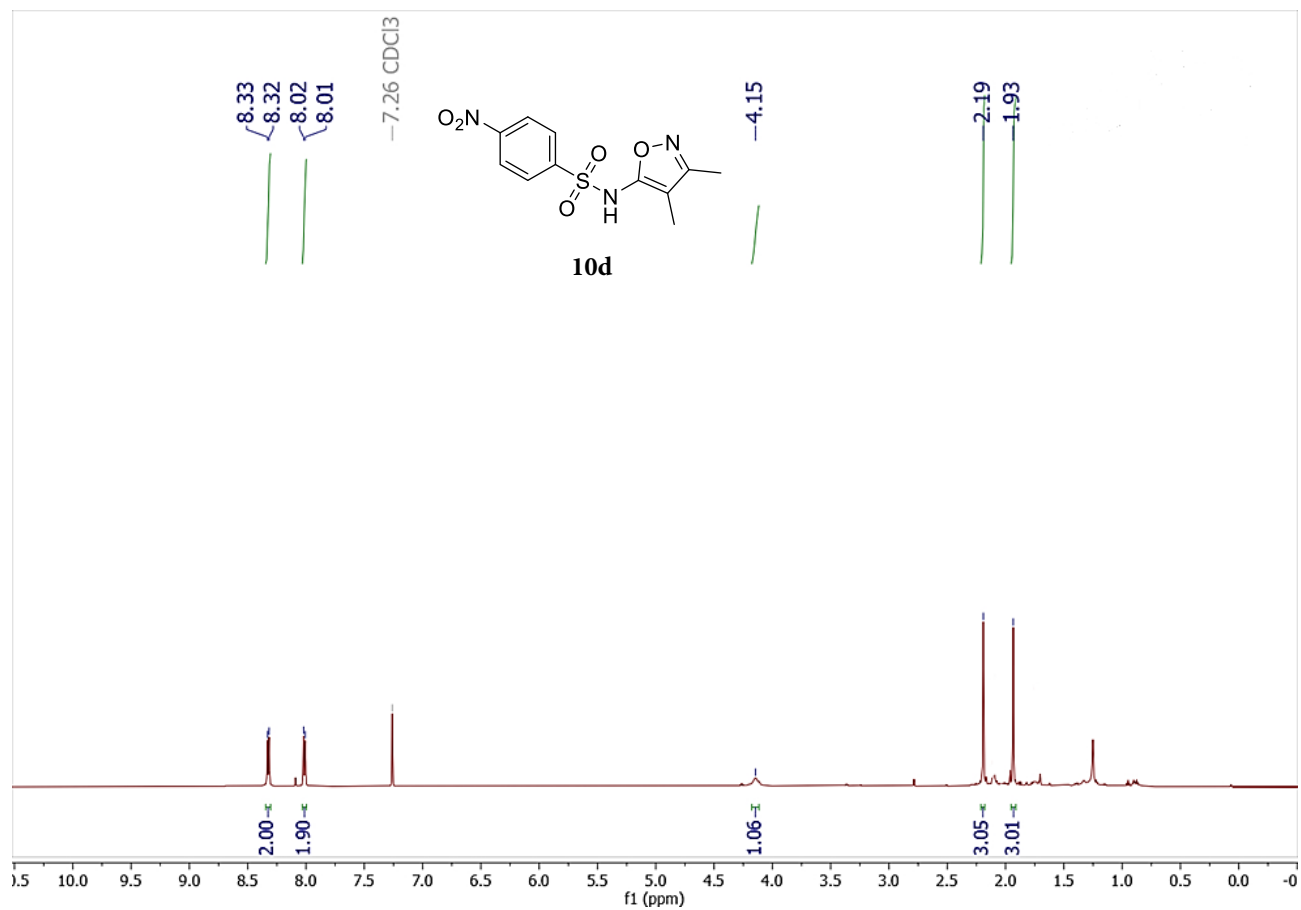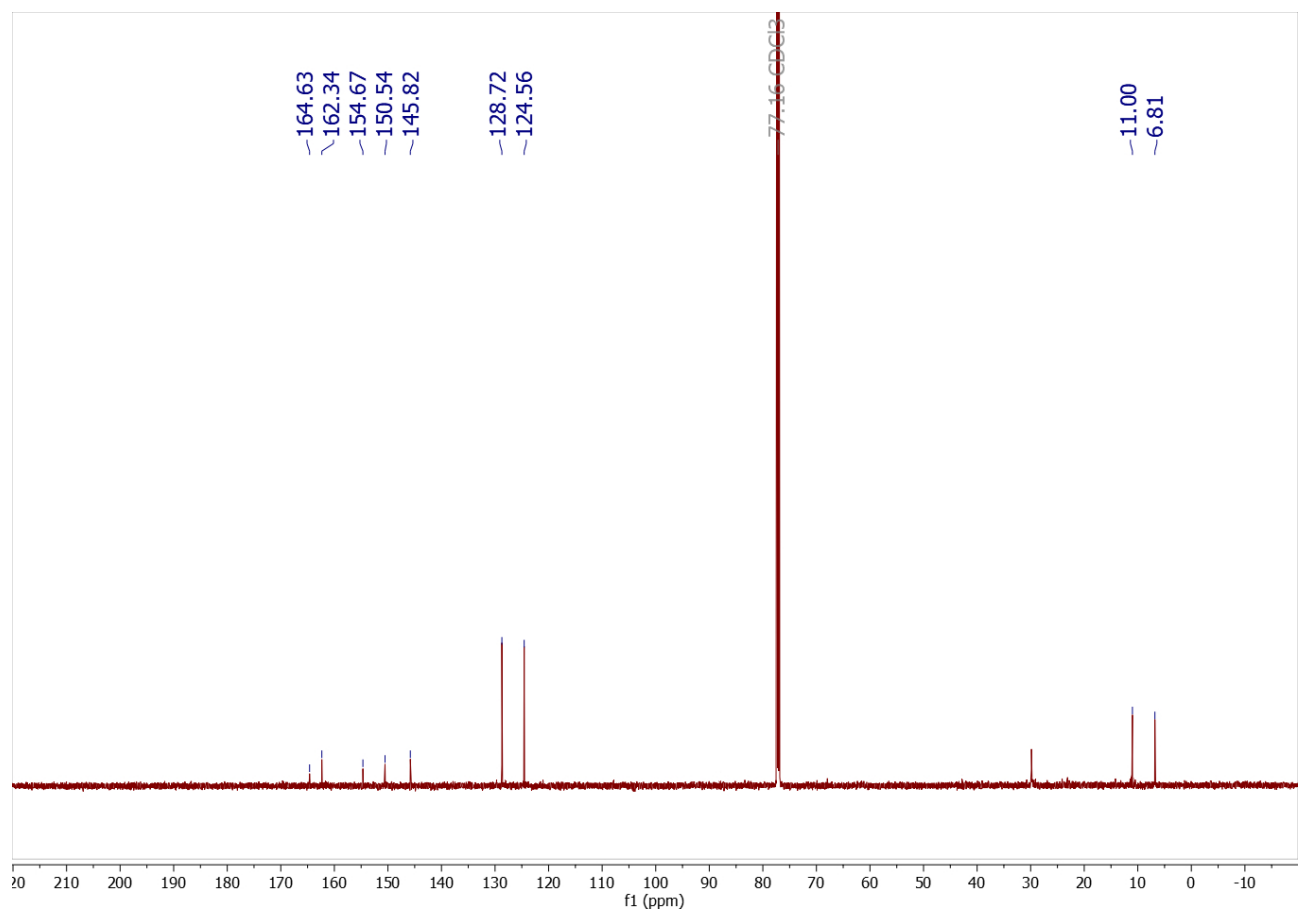

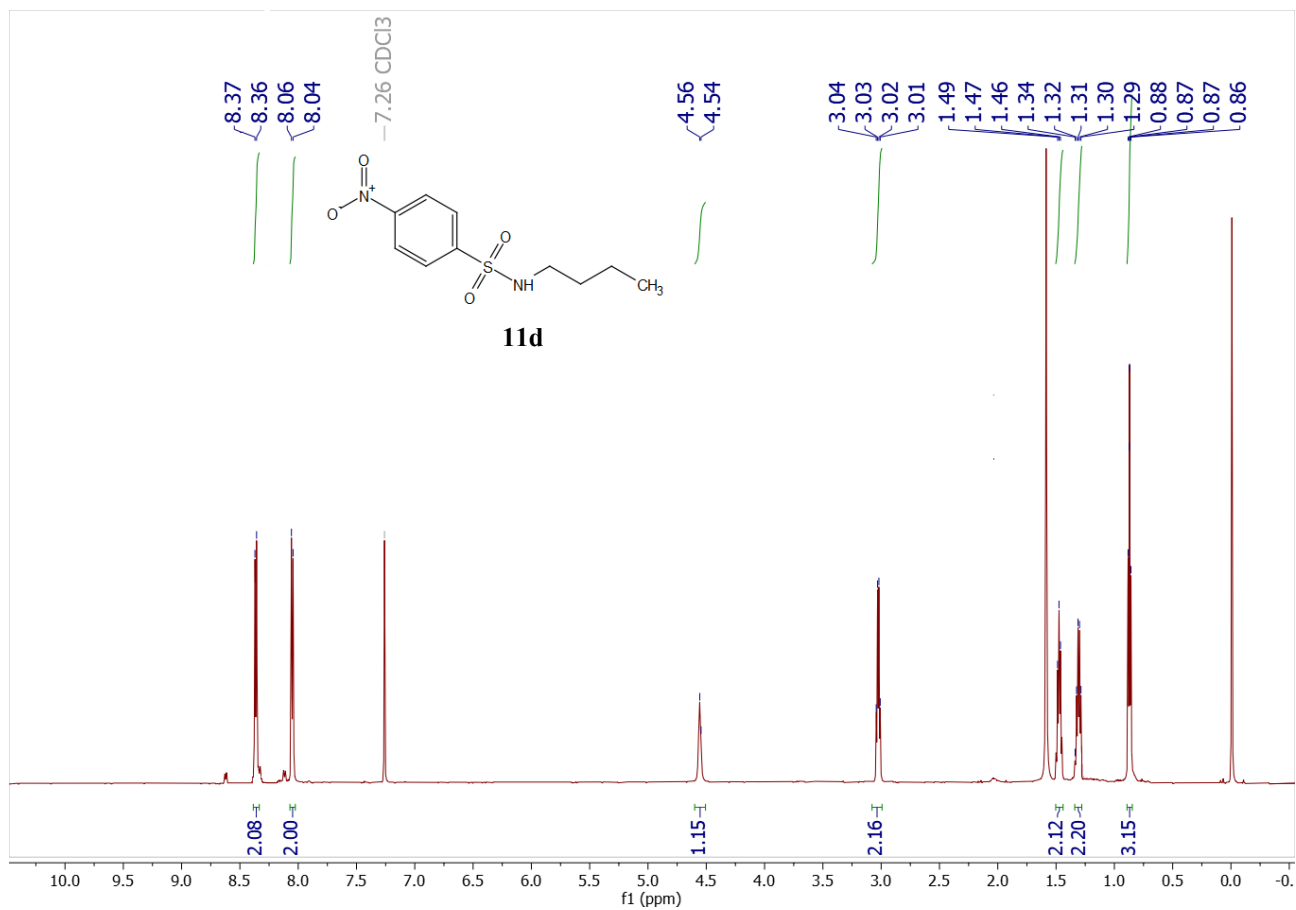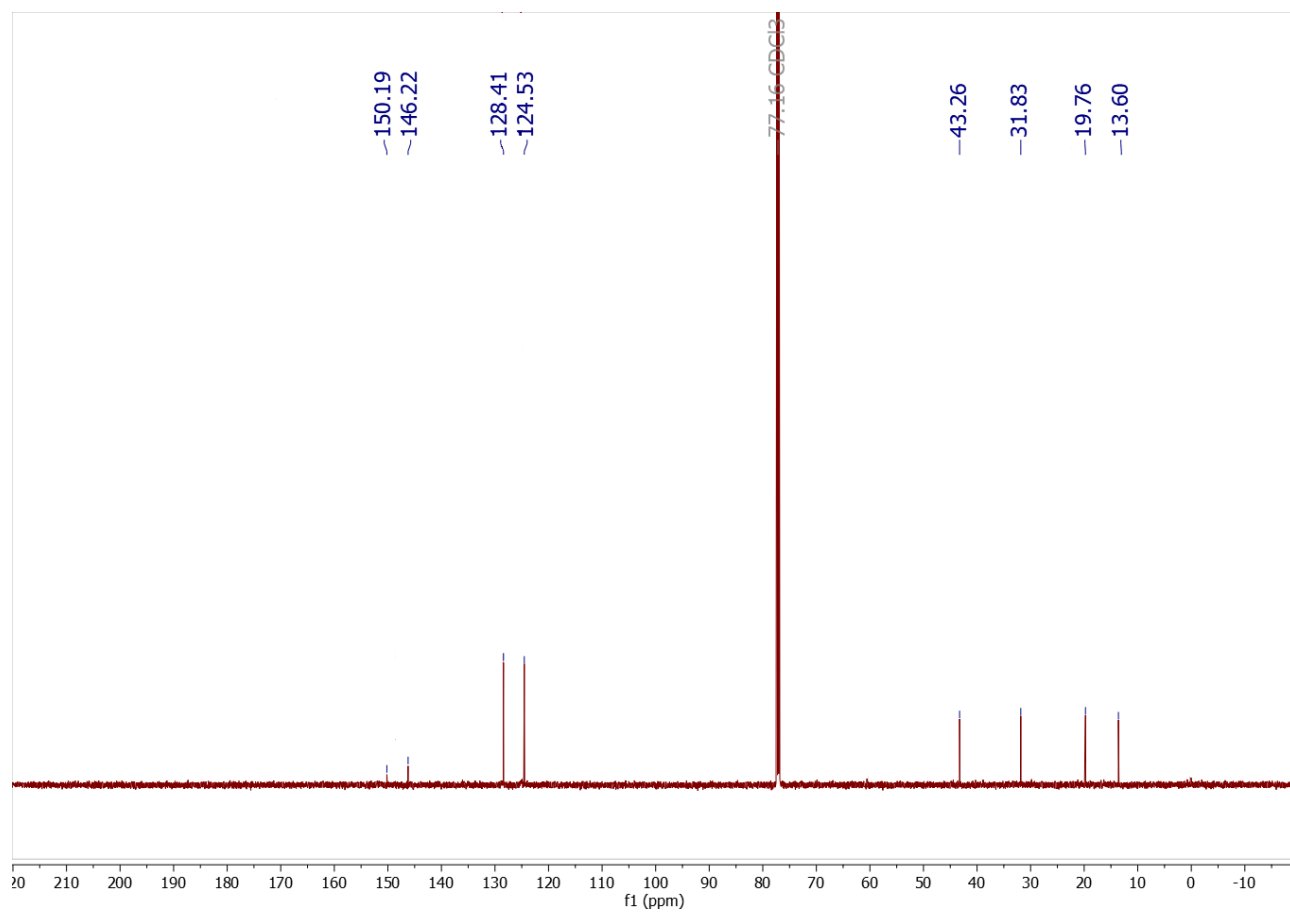

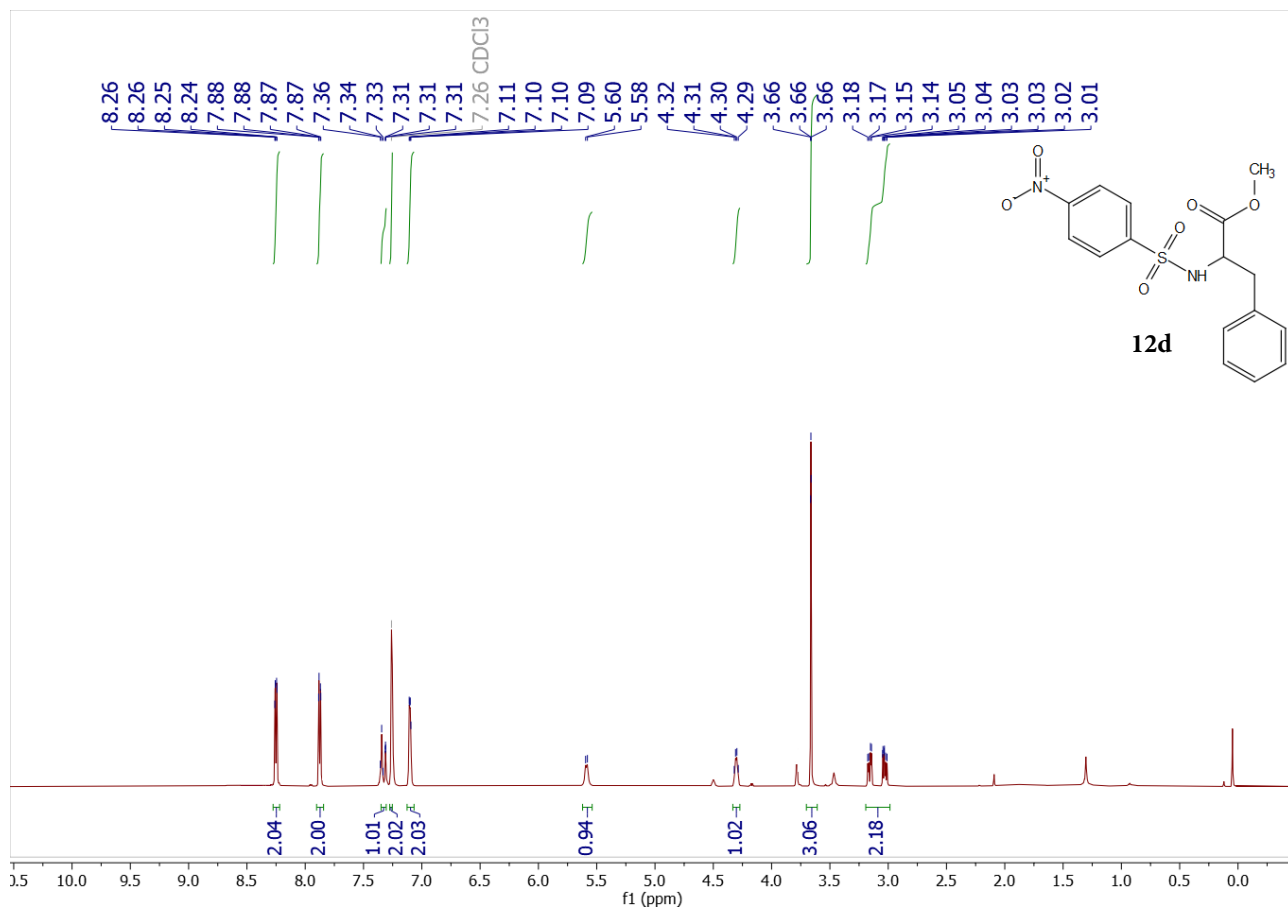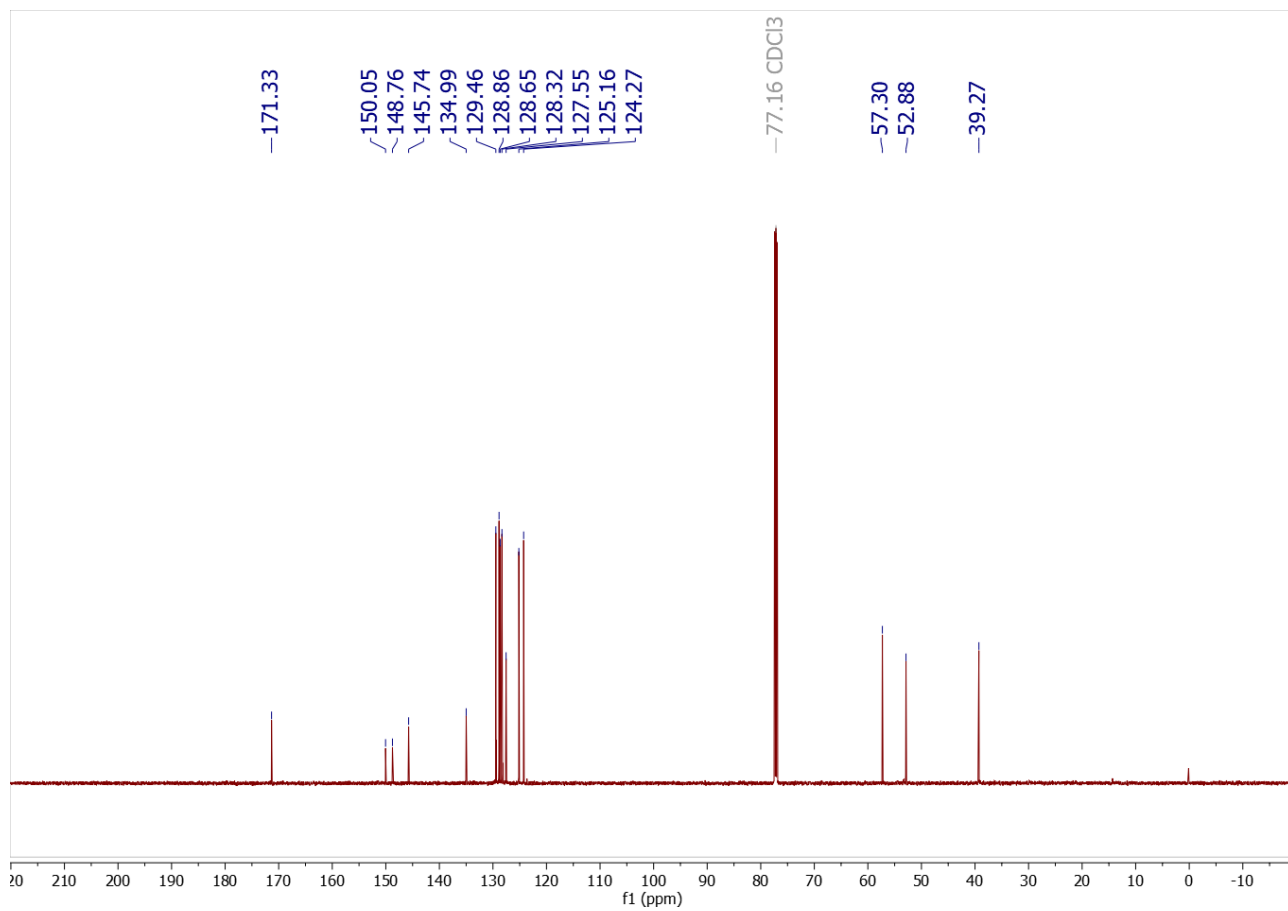

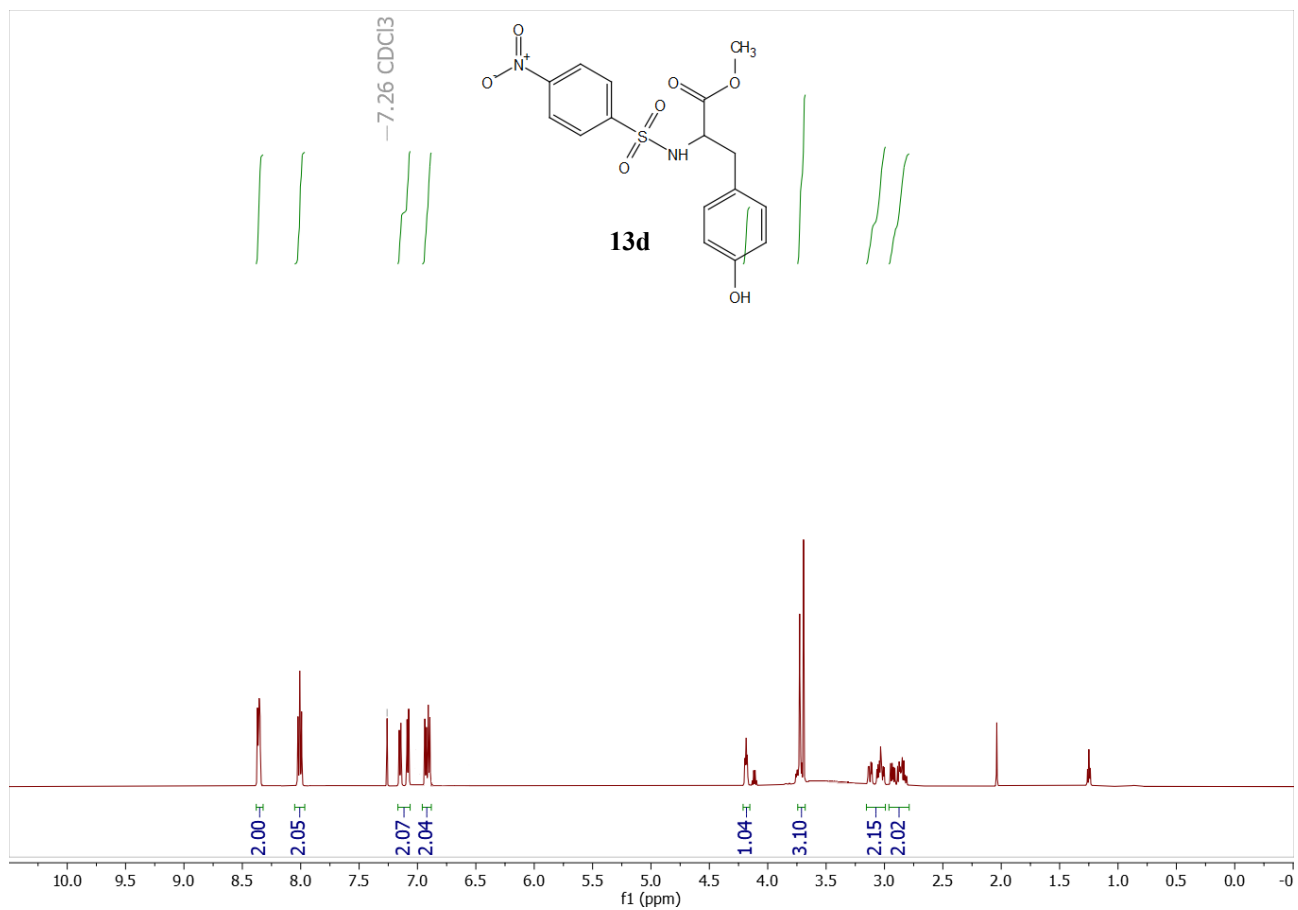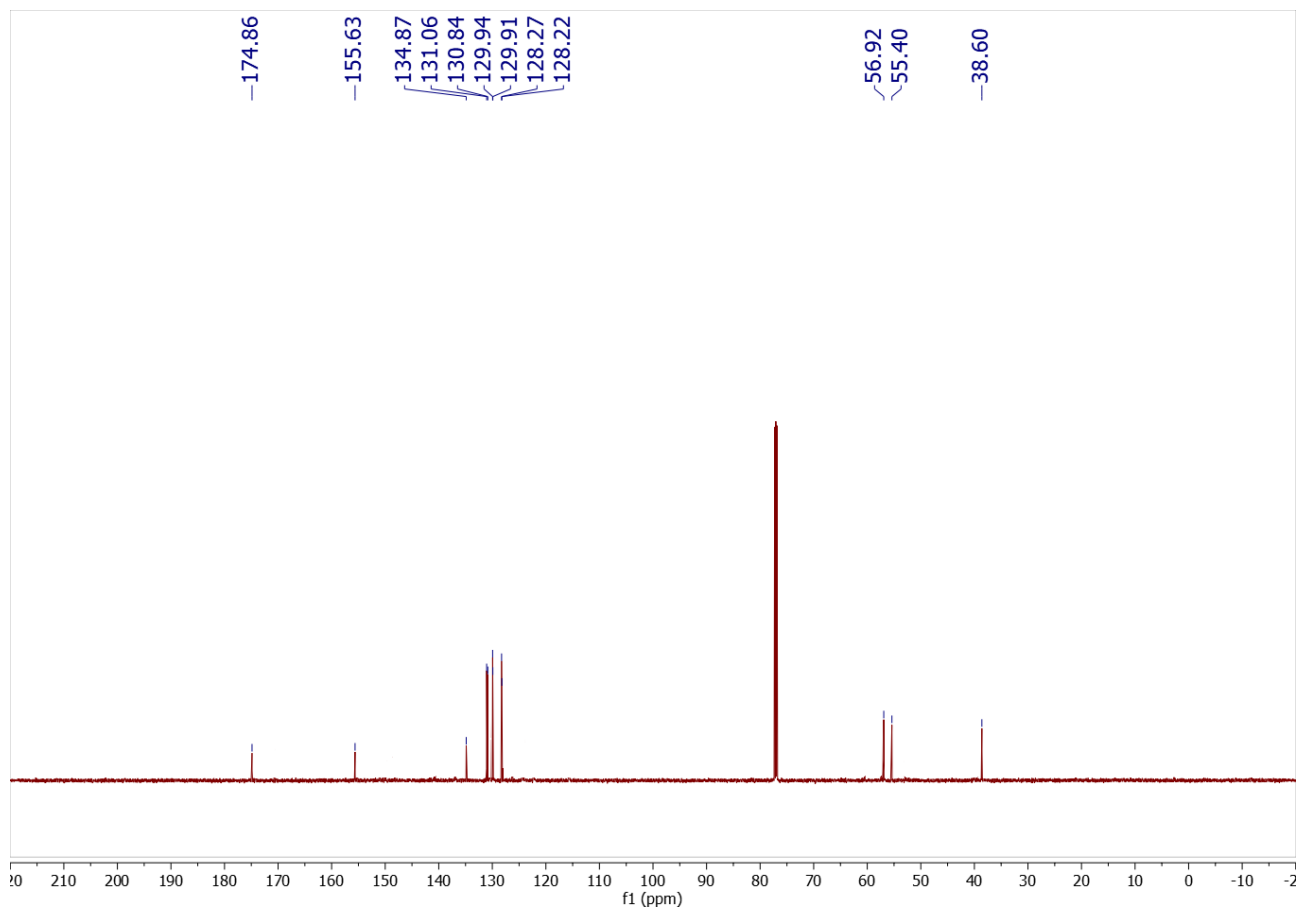

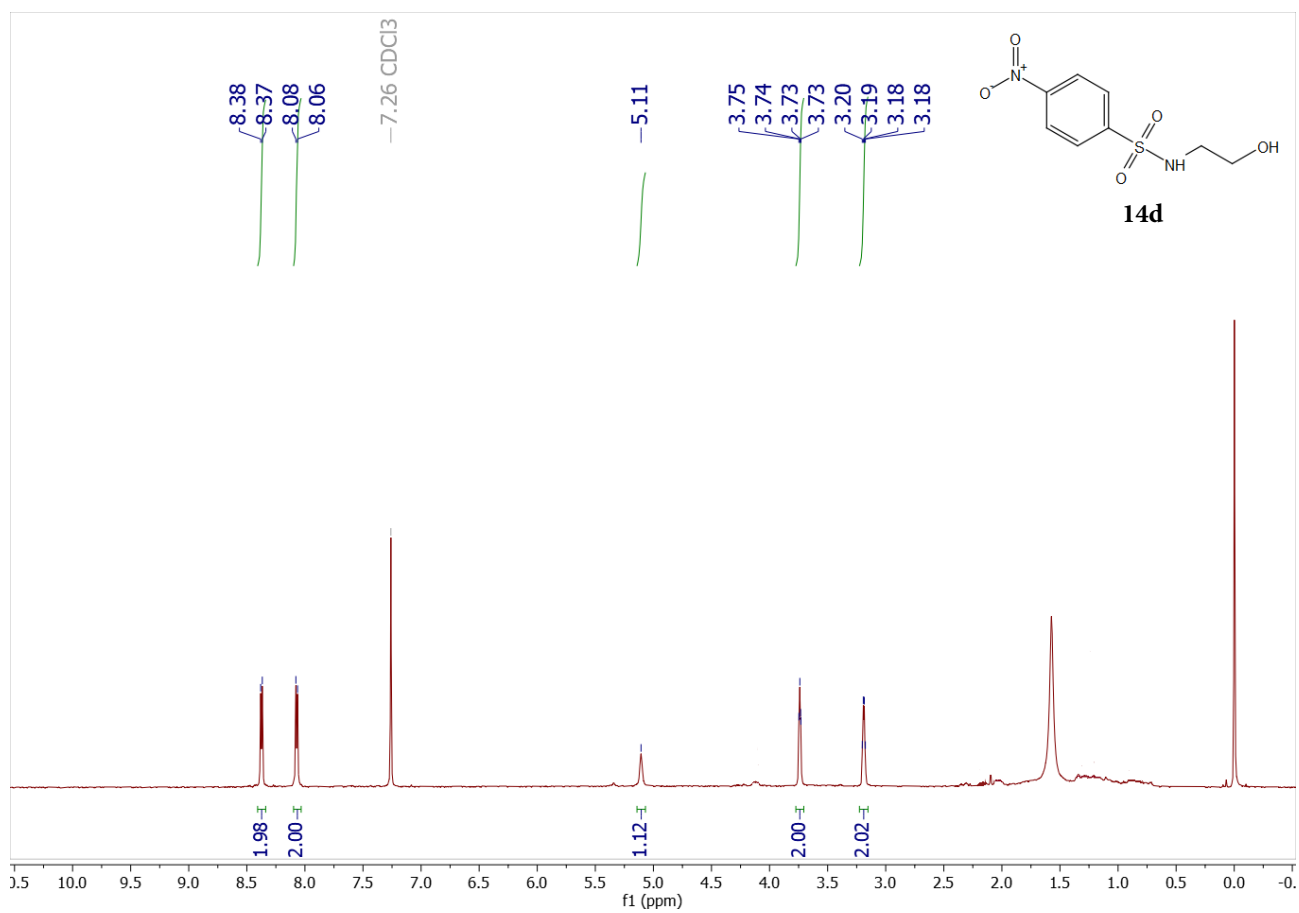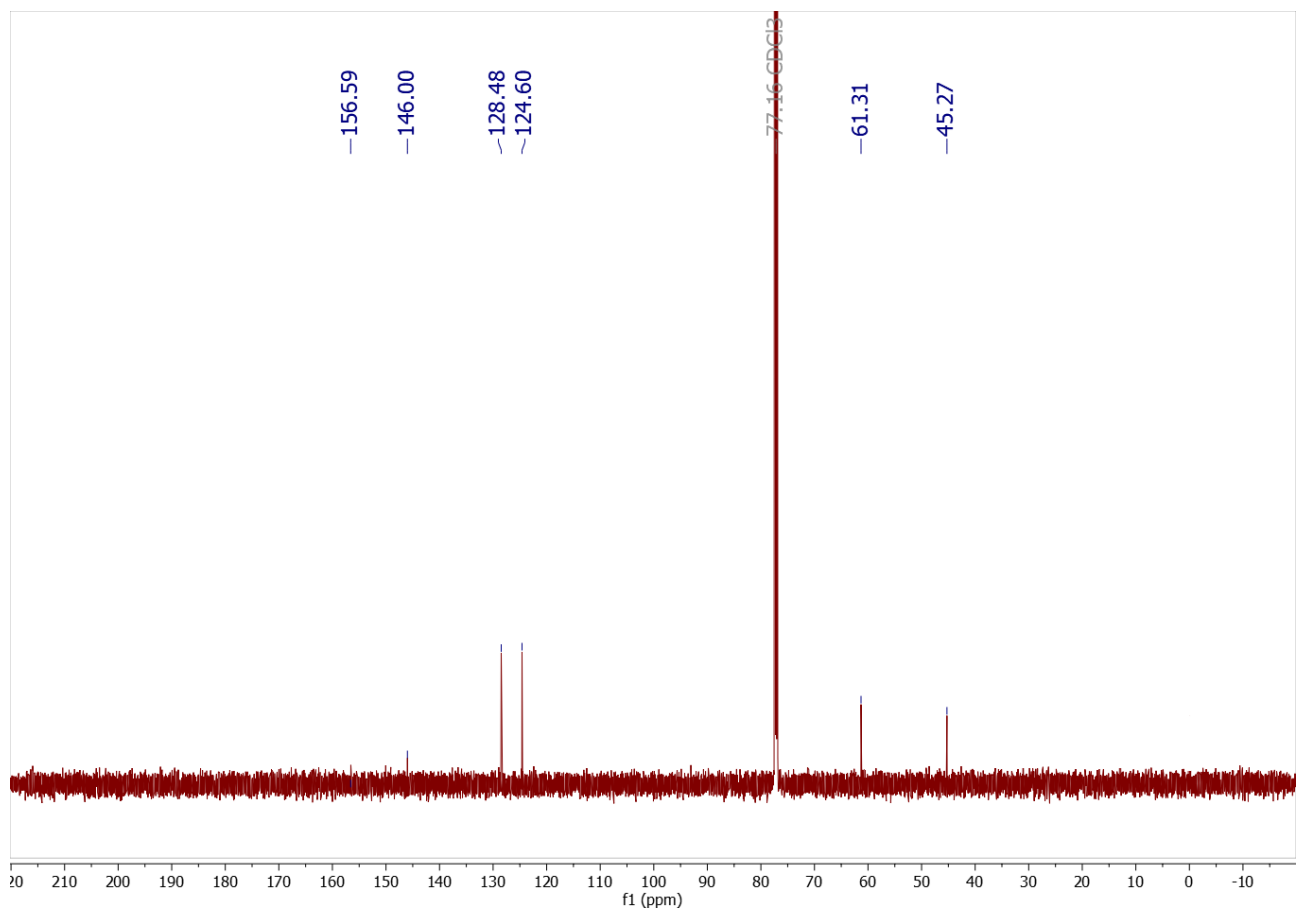

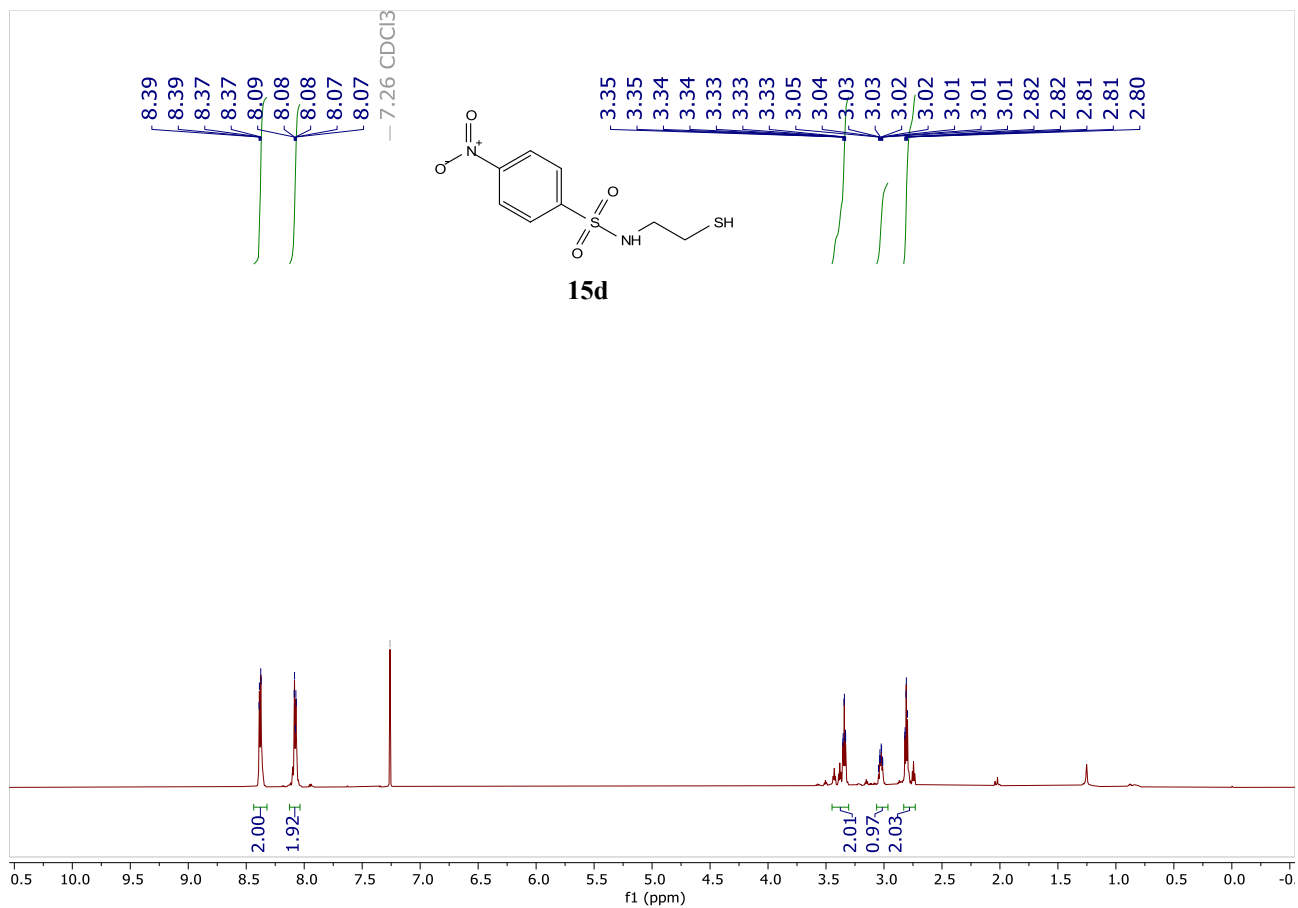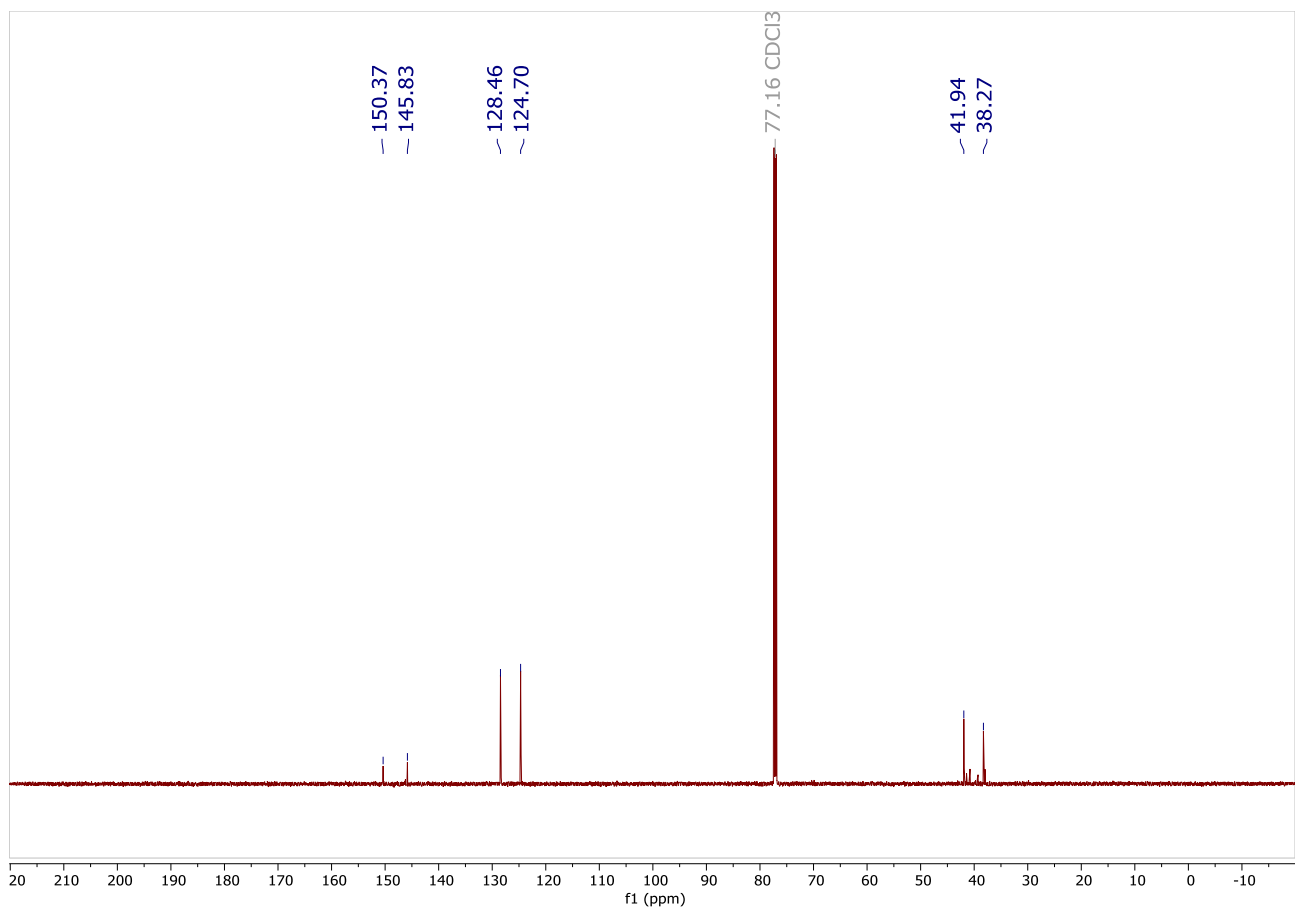



## 8. References

1. M. Kirihara, S. Yamahara, T. Okada, H. Matsumuro, Y. Kinoshita, A. Kitajima, Y. Takamura, T. Odagiri, T. Asawa, Y. Sugiyama and Y. Kimura, *Synth.*, 2022, **54**, 4120–4128.
2. R. Chen, S. Xu, F. Shen, C. Xu, K. Wang, Z. Wang and L. Liu, *Molecules*, DOI:10.3390/molecules26185551.
3. V. V. Sokolov, A. N. Butkevich, V. N. Yuskovets, A. A. Tomashevskii and A. A. Potekhin, *Russ. J. Org. Chem.*, 2005, **41**, 1023–1035.
4. A. Gómez-Palomino and J. Cornella, *Angew. Chemie - Int. Ed.*, 2019, **58**, 18235–18239.
5. H. Zhu, Y. Shen, Q. Deng and T. Tu, *Chem. Commun.*, 2015, **51**, 16573.
6. C. Buathongjan, D. Beukeaw and S. Yotphan, *European J. Org. Chem.*, 2015, **2015**, 1575–1582.
7. S. P. Miller, Y. L. Zhong, Z. Liu, M. Simeone, N. Yasuda, J. Limanto, Z. Chen, J. Lynch and V. Capodanno, *Org. Lett.*, 2014, **16**, 174–177.
8. S. Mkrtychyan and V. O. Iaroshenko, *Chem. Commun.*, 2021, **57**, 11029–11032.
9. N. Shohji, T. Kawaji and S. Okamoto, *Org. Lett.*, 2011, **13**, 2626–2629.
10. H. Jiang, X. Tang, Z. Xu, H. Wang, K. Han, X. Yang, Y. Zhou, Y. L. Feng, X. Y. Yu and Q. Gui, *Org. Biomol. Chem.*, 2019, **17**, 2715–2720.
11. W. Wei, C. Liu, D. Yang, J. Wen, J. You and H. Wang, *Adv. Synth. Catal.*, 2015, **357**, 987–992.
12. J. H. Xu, Z. K. Liu, Y. L. Tang, Y. Gao and X. Q. Hu, *Chem. Commun.*, 2022, **58**, 4180–4183.
13. K. Liu, G. Wang, Z. W. Zhang, Y. Y. Shi and Z. S. Ye, *Org. Lett.*, 2022, **24**, 6489–6493.
14. R. Pothikumar, C. Sivaraj, K. Giridharan, M. K. Ravva and K. Namitharan, *Org. Lett.*, 2022, **24**, 4310–4315.
15. A. J. Chinn, K. Sedillo and A. G. Doyle, *J. Am. Chem. Soc.*, 2021, **143**, 18331–18338.
16. R. L. Gawade, D. K. Chakravarty, A. Kotmale, E. Sangtani, P. V. Joshi, A. Ahmed, M. V. Mane, S. Das, K. Vanka, P. R. Rajamohanam, V. G. Puranik and R. G. Gonnade, *Cryst. Growth Des.*, 2016, **16**, 2416–2428.
17. A. Ramunno, S. Cosconati, S. Sartini, V. Maglio, S. Angiuoli, V. La Pietra, S. Di Maro, M. Giustiniano, C. La Motta, F. Da Settimo, L. Marinelli and E. Novellino, *Eur. J. Med. Chem.*, 2012, **51**, 216–226.
18. R. Pingaew, S. Prachayasittikul, S. Ruchirawat and V. Prachayasittikul, *Med. Chem. Res.*, 2013, **22**, 267–277.
19. W. D. Guerra, D. Lucena-Agell, R. Hortigüela, R. A. Rossi, J. Fernando Díaz, J. M. Padrón and S. M. Barolo, *ChemMedChem*, 2021, **16**, 3003–3016.
20. H. Yu and Y. Zhang, *Chinese J. Chem.*, 2016, **34**, 359–362.
21. M. E. Huber, L. Toy, M. F. Schmidt, H. Vogt, J. Budzinski, M. F. J. Wiefhoff, N. Merten, E. Kostenis, D. Weikert and M. Schiedel, *Angew. Chemie - Int. Ed.*, 2022, **61**, 1–5.
22. T. Sephton, J. M. Large, S. Butterworth and M. F. Greaney, *Org. Lett.*, 2022, **24**, 1132–1135.
23. L. Y. Lam, K. H. Chan and C. Ma, *J. Org. Chem.*, 2022, **87**, 8802–8810.
24. U. Kloeckner and B. J. Nachtsheim, *Chem. Commun.*, 2014, **50**, 10485–10487.
25. P. Mukherjee, C. P. Woroch, L. Cleary, M. Rusznak, R. W. Franzese, M. R. Reese, J. W. Tucker, J. M. Humphrey, S. M. Etuk, S. C. Kwan, C. W. Am Ende and N. D. Ball, *Org. Lett.*, 2018, **20**, 3943–3947.
26. H. J. Jung, M. Cho, Y. Kim, G. Han and H. J. Kwon, *J. Med. Chem.*, 2014, **57**, 7990–7998.
27. N. B. Palakurthy, D. Dev, S. Rana, K. C. Nadimpally and B. Mandal, *European J. Org. Chem.*, 2013, 2627–2633.
28. E. Başaran, R. Çakmak, M. Şentürk and T. Taskin-Tok, *J. Mol. Recognit.*, 2022, **35**, 1–13.
29. F. Xu, L. Zhang, Y. Jia, X. Wang, X. Li, Q. Wen, Y. Zhang and W. Xu, *Eur. J. Med. Chem.*, 2013, **69**, 191–200.
30. W. Liu, T. Babl, A. Röther, O. Reiser and H. M. L. Davies, *Chem. - A Eur. J.*, 2020, **26**, 4236–4241.
31. W. Zhang and M. Luo, *Chem. Commun.*, 2016, **52**, 2980–2983.
32. A. Çelik, G. Yetiş, M. Ay and T. Güngör, *Bioorganic Med. Chem. Lett.*, 2016, **26**, 4057–4060.
33. S. Costanzi, T. Santhosh Kumar, R. Balasubramanian, T. Kendall Harden and K. A. Jacobson, *Bioorganic Med. Chem.*, 2012, **20**, 5254–5261.
34. M. Kirihara, S. Yamahara, T. Okada, H. Matsumuro, Y. Kinoshita, A. Kitajima, Y. Takamura, T. Odagiri, T. Asawa, Y. Sugiyama and Y. Kimura, *Synth.*, 2022, **54**, 4120–4128.
35. K. Liu, G. Wang, Z. W. Zhang, Y. Y. Shi and Z. S. Ye, *Org. Lett.*, 2022, **24**, 6489–6493.
